# Supplementary material for: Hydrogen-rich water treatment targets RT1-Db1 and RT1-Bb to alleviate premature ovarian failure in rats
Source: PeerJ. 2023 Jun 28;11:e15564. doi: 10.7717/peerj.15564 (PMC10314742; doi:10.7717/peerj.15564)
Supplement: Table S1 [file peerj-11-15564-s002.xlsx]

## Sheet: Table S1
The 16 overlapped DEPs between POF vs. Control and POF+HRW vs. POF
Accession	Name
ENSRNOP00000060375	Dip2a
ENSRNOP00000046692	Ighm
ENSRNOP00000064865	AABR07051733.1
ENSRNOP00000000522	RT1-Db1
ENSRNOP00000033080	Sprtn
ENSRNOP00000000525	RT1-Bb
ENSRNOP00000075255	Grin2d
ENSRNOP00000072158	Fkbp11
ENSRNOP00000021884	Mcee
ENSRNOP00000001743	S100b
ENSRNOP00000018888	Cyld
ENSRNOP00000026514	Smg5
ENSRNOP00000013073	Akr1b8
ENSRNOP00000018460	Tubgcp4
ENSRNOP00000026364	Irf9
ENSRNOP00000000713	Cdk19

## Sheet: Raw data
Accession	Protein Name	Gene Name	Description	Coverage	Unique Peptides	Peptides	PSMs	AAs	MW [kDa]	calc. pI	Con1	Con2	Con3	CTX1	CTX2	CTX3	CTXH1	CTXH2	CTXH3	Identified or Quantified
ENSRNOP00000073548	plectin	Plec	pep chromosome:Rnor_6.0:7:117230321:117265493:-1 gene:ENSRNOG00000023781.7 transcript:ENSRNOT00000083429.1 gene_biotype:protein_coding transcript_biotype:protein_coding gene_symbol:Plec description:plectin [Source:RGD Symbol;Acc:621649]	50	235	236	456	4688	533.5	5.91	1.0007	0.999989	0.98714	0.9626	1.02212	1.03694	1.02288	0.989324	0.992535	Quantified
ENSRNOP00000069026	AHNAK nucleoprotein	Ahnak	pep chromosome:Rnor_6.0:1:225184939:225215015:1 gene:ENSRNOG00000057569.1 transcript:ENSRNOT00000079456.1 gene_biotype:protein_coding transcript_biotype:protein_coding gene_symbol:Ahnak description:AHNAK nucleoprotein [Source:RGD Symbol;Acc:619779]	62	178	178	576	5450	580.8	6.14	0.985298	0.995212	0.978738	0.94632	1.02767	1.03994	1.01057	1.01841	1.01292	Quantified
ENSRNOP00000035440	myosin heavy chain 9-like 1	Myh9l1	pep chromosome:Rnor_6.0:7:118992356:119071712:-1 gene:ENSRNOG00000049236.2 transcript:ENSRNOT00000037611.5 gene_biotype:protein_coding transcript_biotype:protein_coding gene_symbol:Myh9l1 description:myosin heavy chain 9-like 1 [Source:RGD Symbol;Acc:6492022]	59	101	125	710	1960	226.3	5.66	1.04918	0.957679	0.928419	0.926122	0.981831	1.13423	1.03189	0.979006	1.02884	Quantified
ENSRNOP00000074575	myosin heavy chain 11	Myh11	pep chromosome:Rnor_6.0:10:764421:859184:1 gene:ENSRNOG00000057880.1 transcript:ENSRNOT00000084608.1 gene_biotype:protein_coding transcript_biotype:protein_coding gene_symbol:Myh11 description:myosin heavy chain 11 [Source:RGD Symbol;Acc:3136]	58	2	126	547	1972	227.2	5.49	0.957296	1.2178	0.89083	1.02072	1.05274	0.906462	1.09671	0.962742	0.905176	Quantified
ENSRNOP00000073929	myosin heavy chain 11	Myh11	pep chromosome:Rnor_6.0:10:764430:858894:1 gene:ENSRNOG00000057880.1 transcript:ENSRNOT00000087567.1 gene_biotype:protein_coding transcript_biotype:protein_coding gene_symbol:Myh11 description:myosin heavy chain 11 [Source:RGD Symbol;Acc:3136]	58	1	125	545	1979	227.9	5.49	0.947573	1.22277	1.16013	1.01522	1.05364	0.897518	1.00805	0.876078	0.826051	Quantified
ENSRNOP00000070703	filamin A	Flna	pep chromosome:Rnor_6.0:X:156463953:156487245:1 gene:ENSRNOG00000054890.1 transcript:ENSRNOT00000079889.1 gene_biotype:protein_coding transcript_biotype:protein_coding gene_symbol:Flna description:filamin A [Source:RGD Symbol;Acc:1560614]	60	116	129	580	2639	280.3	6.04	0.997995	1.08837	0.927737	1.03691	1.01169	0.978816	1.05386	0.990768	0.926919	Quantified
ENSRNOP00000066312	dynein cytoplasmic 1 heavy chain 1	Dync1h1	pep chromosome:Rnor_6.0:6:134958854:135085769:1 gene:ENSRNOG00000006178.8 transcript:ENSRNOT00000073950.3 gene_biotype:protein_coding transcript_biotype:protein_coding gene_symbol:Dync1h1 description:dynein cytoplasmic 1 heavy chain 1 [Source:RGD Symbol;Acc:2511]	37	167	167	385	4644	531.7	6.42	1.00178	1.00941	0.98833	0.992404	0.992743	1.00018	1.00735	1.01252	1.00961	Quantified
ENSRNOP00000068710	spectrin, alpha, non-erythrocytic 1	Sptan1	pep chromosome:Rnor_6.0:3:8534476:8599260:1 gene:ENSRNOG00000015396.7 transcript:ENSRNOT00000082672.1 gene_biotype:protein_coding transcript_biotype:protein_coding gene_symbol:Sptan1 description:spectrin, alpha, non-erythrocytic 1 [Source:RGD Symbol;Acc:621714]	54	1	126	325	2452	282.2	5.31	0.981145	1.00513	0.912956	1.03259	1.02361	1.00471	0.994076	1.04765	1.01425	Quantified
ENSRNOP00000042382	spectrin, alpha, non-erythrocytic 1	Sptan1	pep chromosome:Rnor_6.0:3:8534440:8599258:1 gene:ENSRNOG00000015396.7 transcript:ENSRNOT00000045827.4 gene_biotype:protein_coding transcript_biotype:protein_coding gene_symbol:Sptan1 description:spectrin, alpha, non-erythrocytic 1 [Source:RGD Symbol;Acc:621714]	53	1	126	324	2472	284.5	5.33	0.992334	1.02442	0.983911	0.969329	1.04387	0.967553	1.0395	0.979437	1.01167	Quantified
ENSRNOP00000062744	myosin heavy chain 10	Myh10	pep chromosome:Rnor_6.0:10:55275411:55406732:1 gene:ENSRNOG00000002886.6 transcript:ENSRNOT00000065895.1 gene_biotype:protein_coding transcript_biotype:protein_coding gene_symbol:Myh10 description:myosin heavy chain 10 [Source:RGD Symbol;Acc:71000]	52	84	108	428	1976	228.9	5.54	0.995304	1.00317	0.943947	1.04576	0.97168	0.988815	1.0281	0.976607	1.06176	Quantified
ENSRNOP00000022401	talin 1	Tln1	pep chromosome:Rnor_6.0:5:59033636:59063592:-1 gene:ENSRNOG00000016630.6 transcript:ENSRNOT00000022400.5 gene_biotype:protein_coding transcript_biotype:protein_coding gene_symbol:Tln1 description:talin 1 [Source:RGD Symbol;Acc:1306247]	51	95	111	370	2541	269.5	6.2	1.01957	1.0217	0.976907	0.996612	1.00757	0.991895	1.02944	0.983962	0.985326	Quantified
ENSRNOP00000074766	spectrin, beta, non-erythrocytic 1	Sptbn1	pep chromosome:Rnor_6.0:14:114518943:114649173:-1 gene:ENSRNOG00000005434.7 transcript:ENSRNOT00000083528.1 gene_biotype:protein_coding transcript_biotype:protein_coding gene_symbol:Sptbn1 description:spectrin, beta, non-erythrocytic 1 [Source:RGD Symbol;Acc:727922]	55	103	114	283	2358	273.3	5.64	1.0006	1.01364	0.985361	0.992351	1.02291	0.991152	1.01566	0.977536	1.01413	Quantified
ENSRNOP00000066885	complement C3	C3	pep chromosome:Rnor_6.0:9:9721105:9747167:1 gene:ENSRNOG00000046834.3 transcript:ENSRNOT00000073042.3 gene_biotype:protein_coding transcript_biotype:protein_coding gene_symbol:C3 description:complement C3 [Source:RGD Symbol;Acc:2232]	54	83	83	458	1663	186.2	6.47	0.97935	1.11952	1.00101	1.10294	0.898093	0.966968	0.882006	1.0363	1.03176	Quantified
ENSRNOP00000075119	microtubule-actin crosslinking factor 1	Macf1	pep chromosome:Rnor_6.0:5:141039587:141242131:-1 gene:ENSRNOG00000016047.7 transcript:ENSRNOT00000081482.1 gene_biotype:protein_coding transcript_biotype:protein_coding gene_symbol:Macf1 description:microtubule-actin crosslinking factor 1 [Source:RGD Symbol;Acc:1306057]	20	14	139	198	7384	834.6	5.38	1.01158	0.97373	0.972749	0.969844	1.00159	1.06032	1.00229	1.00508	1.01865	Quantified
ENSRNOP00000005987	clathrin heavy chain	Cltc	pep chromosome:Rnor_6.0:10:74014562:74070266:-1 gene:ENSRNOG00000004291.6 transcript:ENSRNOT00000005987.3 gene_biotype:protein_coding transcript_biotype:protein_coding gene_symbol:Cltc description:clathrin heavy chain [Source:RGD Symbol;Acc:2364]	47	68	68	325	1675	191.4	5.69	1.02073	0.994582	0.957629	0.980468	0.978569	1.01541	1.01519	0.995533	1.05691	Quantified
ENSRNOP00000069001	microtubule-actin crosslinking factor 1	Macf1	pep chromosome:Rnor_6.0:5:141040752:141229781:-1 gene:ENSRNOG00000016047.7 transcript:ENSRNOT00000091828.1 gene_biotype:protein_coding transcript_biotype:protein_coding gene_symbol:Macf1 description:microtubule-actin crosslinking factor 1 [Source:RGD Symbol;Acc:1306057]	24	1	125	182	5358	611.1	5.39	0.99005	1.00893	1.04665	1.01764	1.02526	1.07485	1.02378	0.915128	0.911561	Quantified
ENSRNOP00000003921	albumin	Alb	pep chromosome:Rnor_6.0:14:19176277:19191863:-1 gene:ENSRNOG00000002911.5 transcript:ENSRNOT00000003921.4 gene_biotype:protein_coding transcript_biotype:protein_coding gene_symbol:Alb description:albumin [Source:RGD Symbol;Acc:2085]	79	47	47	1634	608	68.7	6.48	0.933719	1.20065	1.07258	1.08786	0.85361	0.968793	0.859198	1.09456	0.947649	Quantified
ENSRNOP00000019969	murinoglobulin 1	Mug1	pep chromosome:Rnor_6.0:4:154676427:154729310:1 gene:ENSRNOG00000037188.5 transcript:ENSRNOT00000019969.6 gene_biotype:protein_coding transcript_biotype:protein_coding gene_symbol:Mug1 description:murinoglobulin 1 [Source:RGD Symbol;Acc:621366]	39	8	46	380	1487	165.2	6.01	0.994943	1.07407	1.06692	1.03183	0.862802	0.987534	0.945258	1.03373	1.01932	Quantified
ENSRNOP00000070399	filamin B	Flnb	pep chromosome:Rnor_6.0:15:18750118:18883005:-1 gene:ENSRNOG00000009470.7 transcript:ENSRNOT00000088264.1 gene_biotype:protein_coding transcript_biotype:protein_coding gene_symbol:Flnb description:filamin B [Source:RGD Symbol;Acc:1311915]	41	78	90	240	2602	277.7	5.67	0.986542	0.9996	0.983703	0.986959	1.00023	1.02294	1.0137	0.983196	1.03818	Quantified
ENSRNOP00000074748	vinculin	Vcl	pep chromosome:Rnor_6.0:15:3456993:3544702:-1 gene:ENSRNOG00000010765.7 transcript:ENSRNOT00000085126.1 gene_biotype:protein_coding transcript_biotype:protein_coding gene_symbol:Vcl description:vinculin [Source:RGD Symbol;Acc:1311217]	59	68	68	274	1134	123.5	5.71	1.00438	1.08951	0.929119	1.00095	1.01357	0.984706	1.04902	0.994142	0.947692	Quantified
ENSRNOP00000040516	murinoglobulin 1	Mug1	pep chromosome:Rnor_6.0:4:154505826:154564976:1 gene:ENSRNOG00000037188.5 transcript:ENSRNOT00000044408.5 gene_biotype:protein_coding transcript_biotype:protein_coding gene_symbol:Mug1 description:murinoglobulin 1 [Source:RGD Symbol;Acc:621366]	35	10	44	411	1477	163.6	6.05	1.00402	1.07541	1.08128	1.05075	0.877936	0.961901	0.943731	1.02443	0.995571	Quantified
ENSRNOP00000070379	filamin C	Flnc	pep chromosome:Rnor_6.0:4:56711275:56738100:1 gene:ENSRNOG00000007281.7 transcript:ENSRNOT00000088149.1 gene_biotype:protein_coding transcript_biotype:protein_coding gene_symbol:Flnc description:filamin C [Source:RGD Symbol;Acc:1308807]	37	74	88	225	2726	290.8	5.9	0.972302	1.07554	0.988737	1.05708	1.02213	0.992901	0.998731	0.988182	0.918293	Quantified
ENSRNOP00000027773	actinin alpha 4	Actn4	pep chromosome:Rnor_6.0:1:87078020:87147308:-1 gene:ENSRNOG00000020433.7 transcript:ENSRNOT00000027773.7 gene_biotype:protein_coding transcript_biotype:protein_coding gene_symbol:Actn4 description:actinin alpha 4 [Source:RGD Symbol;Acc:61816]	65	40	55	281	911	104.8	5.44	0.98557	0.992872	0.940273	0.956357	1.03147	1.04112	1.05516	0.982673	1.0293	Quantified
ENSRNOP00000012725	transferrin	Tf	pep chromosome:Rnor_6.0:8:111673547:111721333:-1 gene:ENSRNOG00000030625.6 transcript:ENSRNOT00000012725.8 gene_biotype:protein_coding transcript_biotype:protein_coding gene_symbol:Tf description:transferrin [Source:RGD Symbol;Acc:3845]	51	11	50	561	979	107.3	8.05	0.946637	1.23111	1.07323	1.02328	0.866334	0.997549	0.871912	1.05891	0.94912	Quantified
ENSRNOP00000063666	heat shock protein family D (Hsp60) member 1	Hspd1	pep chromosome:Rnor_6.0:9:61680530:61690956:-1 gene:ENSRNOG00000014525.5 transcript:ENSRNOT00000066589.2 gene_biotype:protein_coding transcript_biotype:protein_coding gene_symbol:Hspd1 description:heat shock protein family D (Hsp60) member 1 [Source:RGD Symbol;Acc:621314]	72	38	38	395	573	60.9	6.18	0.968082	0.983945	0.932298	0.933899	1.0257	0.98968	1.04487	1.03297	1.10337	Quantified
ENSRNOP00000029373	IQ motif containing GTPase activating protein 2	Iqgap2	pep chromosome:Rnor_6.0:2:26167199:26438790:-1 gene:ENSRNOG00000025406.6 transcript:ENSRNOT00000035017.6 gene_biotype:protein_coding transcript_biotype:protein_coding gene_symbol:Iqgap2 description:IQ motif containing GTPase activating protein 2 [Source:RGD Symbol;Acc:2321734]	46	59	61	199	1425	162.9	5.44	0.966012	0.940502	0.941549	0.95121	1.0377	0.999329	1.05728	1.04632	1.07477	Quantified
ENSRNOP00000026920	heat shock protein 90 alpha family class B member 1	Hsp90ab1	pep chromosome:Rnor_6.0:9:17817791:17823163:1 gene:ENSRNOG00000019834.6 transcript:ENSRNOT00000026920.6 gene_biotype:protein_coding transcript_biotype:protein_coding gene_symbol:Hsp90ab1 description:heat shock protein 90 alpha family class B member 1 [Source:RGD Symbol;Acc:1303075]	52	29	46	271	724	83.2	5.03	1.06351	1.01847	1.01533	1.01458	0.945868	1.01273	0.970111	0.973164	1.00043	Quantified
ENSRNOP00000045637	transferrin	Tf	pep chromosome:Rnor_6.0:8:111694566:111721303:-1 gene:ENSRNOG00000030625.6 transcript:ENSRNOT00000045628.5 gene_biotype:protein_coding transcript_biotype:protein_coding gene_symbol:Tf description:transferrin [Source:RGD Symbol;Acc:3845]	57	1	40	545	698	76.3	7.28	0.93408	1.21045	1.10175	1.06812	0.915785	0.999113	0.819934	1.00886	0.959962	Quantified
ENSRNOP00000026705	lamin A/C	Lmna	pep chromosome:Rnor_6.0:2:187842885:187863516:-1 gene:ENSRNOG00000019638.7 transcript:ENSRNOT00000026705.6 gene_biotype:protein_coding transcript_biotype:protein_coding gene_symbol:Lmna description:lamin A/C [Source:RGD Symbol;Acc:620456]	68	49	51	230	665	74.3	6.98	0.973324	1.00927	0.999721	0.955927	1.05241	0.975611	1.07061	0.974371	1.00037	Quantified
ENSRNOP00000068851	actinin, alpha 1	Actn1	pep chromosome:Rnor_6.0:6:103375799:103470427:-1 gene:ENSRNOG00000056756.1 transcript:ENSRNOT00000091560.1 gene_biotype:protein_coding transcript_biotype:protein_coding gene_symbol:Actn1 description:actinin, alpha 1 [Source:RGD Symbol;Acc:70907]	58	3	50	211	914	105.4	5.39	0.977801	1.0901	0.928377	0.994895	1.02273	0.961396	1.04389	0.988583	1.00546	Quantified
ENSRNOP00000052465	ribosome binding protein 1	Rrbp1	pep chromosome:Rnor_6.0:3:138055240:138116664:-1 gene:ENSRNOG00000005958.8 transcript:ENSRNOT00000055602.5 gene_biotype:protein_coding transcript_biotype:protein_coding gene_symbol:Rrbp1 description:ribosome binding protein 1 [Source:RGD Symbol;Acc:1306536]	61	69	69	157	1453	157.4	9.07	1.09974	1.03629	1.03966	1.02283	0.951324	0.987199	0.936002	0.980959	0.95874	Quantified
ENSRNOP00000034210	LDL receptor related protein 1	Lrp1	pep chromosome:Rnor_6.0:7:70846344:70926903:-1 gene:ENSRNOG00000025053.5 transcript:ENSRNOT00000031005.5 gene_biotype:protein_coding transcript_biotype:protein_coding gene_symbol:Lrp1 description:LDL receptor related protein 1 [Source:RGD Symbol;Acc:1307535]	19	80	81	141	4545	504.6	5.36	1.03265	1.00306	0.958143	1.00464	0.962724	1.03411	0.999686	0.980797	1.03989	Quantified
ENSRNOP00000069598	actinin, alpha 1	Actn1	pep chromosome:Rnor_6.0:6:103376557:103470501:-1 gene:ENSRNOG00000056756.1 transcript:ENSRNOT00000088795.1 gene_biotype:protein_coding transcript_biotype:protein_coding gene_symbol:Actn1 description:actinin, alpha 1 [Source:RGD Symbol;Acc:70907]	59	1	48	205	892	102.9	5.38	0.927215	1.05282	0.978727	1.07277	1.13258	1.04839	0.930117	0.953967	0.919089	Quantified
ENSRNOP00000014464	annexin A6	Anxa6	pep chromosome:Rnor_6.0:10:40320581:40375605:-1 gene:ENSRNOG00000010668.7 transcript:ENSRNOT00000014464.7 gene_biotype:protein_coding transcript_biotype:protein_coding gene_symbol:Anxa6 description:annexin A6 [Source:RGD Symbol;Acc:621172]	68	45	46	325	673	75.7	5.57	1.05116	1.02838	0.954078	0.986802	1.00039	0.983983	1.01635	0.962695	1.02901	Quantified
ENSRNOP00000018021	IQ motif containing GTPase activating protein 1	Iqgap1	pep chromosome:Rnor_6.0:1:142525046:142615673:-1 gene:ENSRNOG00000012002.6 transcript:ENSRNOT00000018021.5 gene_biotype:protein_coding transcript_biotype:protein_coding gene_symbol:Iqgap1 description:IQ motif containing GTPase activating protein 1 [Source:RGD Symbol;Acc:1311884]	37	57	59	163	1657	188.7	6.43	1.03083	0.99448	0.986825	0.958973	0.984273	0.997733	1.02785	1.01504	1.01743	Quantified
ENSRNOP00000073574	pre-mRNA processing factor 8	Prpf8	pep chromosome:Rnor_6.0:10:63635219:63658361:1 gene:ENSRNOG00000003495.7 transcript:ENSRNOT00000081813.1 gene_biotype:protein_coding transcript_biotype:protein_coding gene_symbol:Prpf8 description:pre-mRNA processing factor 8 [Source:RGD Symbol;Acc:1305467]	35	76	76	165	2335	273.4	8.84	1.00772	0.986259	1.00342	0.996143	0.987126	0.964092	1.01607	1.00024	1.05217	Quantified
ENSRNOP00000009467	pregnancy-zone protein	Pzp	pep chromosome:Rnor_6.0:4:161804784:161850875:-1 gene:ENSRNOG00000006709.6 transcript:ENSRNOT00000009467.6 gene_biotype:protein_coding transcript_biotype:protein_coding gene_symbol:Pzp description:pregnancy-zone protein [Source:RGD Symbol;Acc:628643]	39	49	49	281	1500	167	6.9	0.908096	0.949616	0.992122	1.11213	0.972856	1.08161	0.929343	1.03532	1.03988	Quantified
ENSRNOP00000064445	fatty acid synthase	Fasn	pep chromosome:Rnor_6.0:10:109987735:110005901:-1 gene:ENSRNOG00000045636.2 transcript:ENSRNOT00000073321.2 gene_biotype:protein_coding transcript_biotype:protein_coding gene_symbol:Fasn description:fatty acid synthase [Source:RGD Symbol;Acc:620665]	31	70	70	145	2505	272.5	6.39	0.948099	1.03861	0.972183	0.953661	1.12532	1.00012	0.981834	1.02323	0.970448	Quantified
ENSRNOP00000034954		AABR07073181.1	pep chromosome:Rnor_6.0:5:155812105:155885829:1 gene:ENSRNOG00000021437.7 transcript:ENSRNOT00000039341.7 gene_biotype:protein_coding transcript_biotype:protein_coding gene_symbol:AABR07073181.1	30	58	58	148	2449	262.9	5.99	1.00816	1.03002	0.986167	1.00013	1.02813	0.975781	1.03152	1.00285	0.949457	Quantified
ENSRNOP00000065828		AABR07048992.1	pep chromosome:Rnor_6.0:5:99031013:99033107:-1 gene:ENSRNOG00000032585.5 transcript:ENSRNOT00000041306.5 gene_biotype:protein_coding transcript_biotype:protein_coding gene_symbol:AABR07048992.1	60	26	36	412	661	72.7	5.58	1.05262	0.993714	0.982586	0.99151	0.966835	1.02296	0.98054	0.993052	1.03107	Quantified
ENSRNOP00000041821	eukaryotic translation elongation factor 2	Eef2	pep chromosome:Rnor_6.0:7:11401501:11406771:-1 gene:ENSRNOG00000020266.5 transcript:ENSRNOT00000047450.3 gene_biotype:protein_coding transcript_biotype:protein_coding gene_symbol:Eef2 description:eukaryotic translation elongation factor 2 [Source:RGD Symbol;Acc:61979]	56	45	46	306	858	95.2	6.83	1.07295	0.979353	0.99397	1.01628	0.950283	1.06017	0.963548	0.972392	1.00677	Quantified
ENSRNOP00000001517	GCN1 activator of EIF2AK4	Gcn1	pep chromosome:Rnor_6.0:12:46728699:46789726:-1 gene:ENSRNOG00000021871.6 transcript:ENSRNOT00000001517.7 gene_biotype:protein_coding transcript_biotype:protein_coding gene_symbol:Gcn1 description:GCN1 activator of EIF2AK4 [Source:RGD Symbol;Acc:1593434]	29	72	72	138	2671	292.9	7.3	1.02322	1.00006	0.992744	1.00934	0.992179	1.0113	0.988668	0.997637	0.999244	Quantified
ENSRNOP00000019772	fibronectin 1	Fn1	pep chromosome:Rnor_6.0:9:78900113:78969013:-1 gene:ENSRNOG00000014288.8 transcript:ENSRNOT00000019772.6 gene_biotype:protein_coding transcript_biotype:protein_coding gene_symbol:Fn1 description:fibronectin 1 [Source:RGD Symbol;Acc:2624]	34	66	66	161	2477	272.3	5.67	1.07348	1.0782	0.962029	1.01115	0.992288	1.00125	0.973837	0.998483	0.92248	Quantified
ENSRNOP00000064788	murinoglobulin 2	Mug2	pep chromosome:Rnor_6.0:4:154215250:154282608:1 gene:ENSRNOG00000033245.5 transcript:ENSRNOT00000072465.2 gene_biotype:protein_coding transcript_biotype:protein_coding gene_symbol:Mug2 description:murinoglobulin 2 [Source:RGD Symbol;Acc:1302962]	28	2	30	268	1365	151.9	6.77	0.983319	1.06972	1.0629	1.03993	0.862134	1.06918	0.923357	1.02534	0.983118	Quantified
ENSRNOP00000009556	heat shock protein HSP 90-alpha	LOC103692716	pep chromosome:Rnor_6.0:6:135045363:135049728:-1 gene:ENSRNOG00000007219.7 transcript:ENSRNOT00000009556.7 gene_biotype:protein_coding transcript_biotype:protein_coding gene_symbol:LOC103692716 description:heat shock protein HSP 90-alpha [Source:RGD Symbol;Acc:9292348]	49	26	42	263	733	84.8	5.01	1.00197	0.98737	1.00437	0.999942	0.994042	0.984903	1.00042	1.00328	1.03768	Quantified
ENSRNOP00000040121	valosin-containing protein	Vcp	pep chromosome:Rnor_6.0:5:58426549:58445953:-1 gene:ENSRNOG00000034242.3 transcript:ENSRNOT00000046102.2 gene_biotype:protein_coding transcript_biotype:protein_coding gene_symbol:Vcp description:valosin-containing protein [Source:RGD Symbol;Acc:621595]	62	43	43	184	806	89.3	5.26	0.995914	0.982735	1.01147	0.999301	0.993099	1.01316	1.00715	0.990243	1.02142	Quantified
ENSRNOP00000026696	heat shock protein family A (Hsp70) member 9	Hspa9	pep chromosome:Rnor_6.0:18:27731072:27749235:-1 gene:ENSRNOG00000019525.6 transcript:ENSRNOT00000026696.6 gene_biotype:protein_coding transcript_biotype:protein_coding gene_symbol:Hspa9 description:heat shock protein family A (Hsp70) member 9 [Source:RGD Symbol;Acc:1311806]	63	39	40	198	679	73.7	6.16	0.954687	0.943308	0.934852	0.956935	1.01429	1.06206	1.06699	1.03382	1.04971	Quantified
ENSRNOP00000015331	pyruvate kinase M1/2	Pkm	pep chromosome:Rnor_6.0:8:64481172:64502722:1 gene:ENSRNOG00000011329.7 transcript:ENSRNOT00000015332.7 gene_biotype:protein_coding transcript_biotype:protein_coding gene_symbol:Pkm description:pyruvate kinase M1/2 [Source:RGD Symbol;Acc:3337]	67	6	33	248	531	57.8	7.06	1.00006	0.954779	1.00248	1.00905	0.985962	1.08389	1.00289	0.997731	0.979631	Quantified
ENSRNOP00000075422	collagen type XII alpha 1 chain	Col12a1	pep chromosome:Rnor_6.0:8:87040799:87158368:-1 gene:ENSRNOG00000058470.1 transcript:ENSRNOT00000077071.1 gene_biotype:protein_coding transcript_biotype:protein_coding gene_symbol:Col12a1 description:collagen type XII alpha 1 chain [Source:RGD Symbol;Acc:2374]	23	65	65	143	3143	342.3	5.64	0.944755	1.08823	0.966176	1.0606	0.964016	0.990786	0.98898	1.00332	1.00957	Quantified
ENSRNOP00000068674	2-oxoglutarate dehydrogenase, mitochondrial-like	LOC103693780	pep chromosome:Rnor_6.0:14:86414949:86613327:1 gene:ENSRNOG00000005130.7 transcript:ENSRNOT00000083394.1 gene_biotype:protein_coding transcript_biotype:protein_coding gene_symbol:LOC103693780 description:2-oxoglutarate dehydrogenase, mitochondrial-like [Source:RGD Symbol;Acc:9122992]	43	37	43	141	1023	116.2	6.77	0.926767	0.95779	0.89955	0.916166	1.07538	1.03491	1.07551	0.994313	1.1355	Quantified
ENSRNOP00000023628	heat shock protein family A (Hsp70) member 4	Hspa4	pep chromosome:Rnor_6.0:10:38601624:38642397:-1 gene:ENSRNOG00000016596.3 transcript:ENSRNOT00000023628.3 gene_biotype:protein_coding transcript_biotype:protein_coding gene_symbol:Hspa4 description:heat shock protein family A (Hsp70) member 4 [Source:RGD Symbol;Acc:628878]	50	36	38	136	840	94	5.21	1.03653	1.03592	0.970689	1.02016	0.965595	0.976333	0.998285	0.996061	1.01428	Quantified
ENSRNOP00000016273	utrophin	Utrn	pep chromosome:Rnor_6.0:1:6453549:6970040:-1 gene:ENSRNOG00000011058.7 transcript:ENSRNOT00000016273.5 gene_biotype:protein_coding transcript_biotype:protein_coding gene_symbol:Utrn description:utrophin [Source:RGD Symbol;Acc:3947]	22	71	75	99	3419	391.1	5.29	0.993438	0.978847	1.00251	0.955635	1.03626	1.03969	1.02539	0.998178	0.984028	Quantified
ENSRNOP00000072672	actin, beta	Actb	pep chromosome:Rnor_6.0:12:13716596:13718841:1 gene:ENSRNOG00000034254.4 transcript:ENSRNOT00000080216.1 gene_biotype:protein_coding transcript_biotype:protein_coding gene_symbol:Actb description:actin, beta [Source:RGD Symbol;Acc:628837]	68	10	19	750	378	42.1	5.48	1.02905	1.06276	0.974876	0.973822	1.00574	0.999992	1.03484	0.946003	0.985444	Quantified
ENSRNOP00000071057	glutamyl-prolyl-tRNA synthetase	Eprs	pep chromosome:Rnor_6.0:13:103300932:103371577:1 gene:ENSRNOG00000002393.7 transcript:ENSRNOT00000085214.1 gene_biotype:protein_coding transcript_biotype:protein_coding gene_symbol:Eprs description:glutamyl-prolyl-tRNA synthetase [Source:RGD Symbol;Acc:1310952]	39	52	53	136	1512	169.8	7.44	0.984745	0.998339	1.00138	1.00409	0.983996	1.03997	0.975686	1.00886	1.01925	Quantified
ENSRNOP00000069474	pyruvate kinase M1/2	Pkm	pep chromosome:Rnor_6.0:8:64489942:64502429:1 gene:ENSRNOG00000011329.7 transcript:ENSRNOT00000083666.1 gene_biotype:protein_coding transcript_biotype:protein_coding gene_symbol:Pkm description:pyruvate kinase M1/2 [Source:RGD Symbol;Acc:3337]	72	3	30	233	489	53.2	7.83	1.01105	0.971946	1.00065	1.00839	1.02394	1.14261	1.01961	0.975897	0.861989	Quantified
ENSRNOP00000029144	aconitase 2	Aco2	pep chromosome:Rnor_6.0:7:123102493:123145635:1 gene:ENSRNOG00000024128.6 transcript:ENSRNOT00000038612.5 gene_biotype:protein_coding transcript_biotype:protein_coding gene_symbol:Aco2 description:aconitase 2 [Source:RGD Symbol;Acc:621360]	55	37	37	164	780	85.4	7.83	0.957917	0.974163	0.93232	0.939524	1.02553	1.01698	1.04365	1.0291	1.09656	Quantified
ENSRNOP00000069699	complement C4-like	LOC103689965	pep chromosome:Rnor_6.0:20:4302347:4508197:-1 gene:ENSRNOG00000000443.7 transcript:ENSRNOT00000086027.1 gene_biotype:protein_coding transcript_biotype:protein_coding gene_symbol:LOC103689965 description:complement C4-like [Source:RGD Symbol;Acc:9245878]	32	10	53	178	1737	192.1	7.46	0.865494	0.94009	0.879407	1.12618	1.0015	1.06816	0.965441	1.0625	1.11393	Quantified
ENSRNOP00000046597	ATP citrate lyase	Acly	pep chromosome:Rnor_6.0:10:88392248:88442845:-1 gene:ENSRNOG00000016924.8 transcript:ENSRNOT00000043172.4 gene_biotype:protein_coding transcript_biotype:protein_coding gene_symbol:Acly description:ATP citrate lyase [Source:RGD Symbol;Acc:2018]	48	48	48	140	1091	119.6	7.44	0.981127	0.967181	1.00322	0.99384	1.06863	0.986974	1.00501	0.999644	1.00738	Quantified
ENSRNOP00000052876	fibrillin 1	Fbn1	pep chromosome:Rnor_6.0:3:117569697:117766120:-1 gene:ENSRNOG00000007302.7 transcript:ENSRNOT00000056022.3 gene_biotype:protein_coding transcript_biotype:protein_coding gene_symbol:Fbn1 description:fibrillin 1 [Source:RGD Symbol;Acc:620908]	21	55	57	110	2872	311.7	4.93	0.988325	1.10234	0.918756	1.02047	1.16259	1.05273	1.05627	1.08147	0.628619	Quantified
ENSRNOP00000008200	leucine-rich pentatricopeptide repeat containing	Lrpprc	pep chromosome:Rnor_6.0:6:7984019:8066868:-1 gene:ENSRNOG00000005877.6 transcript:ENSRNOT00000008200.6 gene_biotype:protein_coding transcript_biotype:protein_coding gene_symbol:Lrpprc description:leucine-rich pentatricopeptide repeat containing [Source:RGD Symbol;Acc:1306575]	43	61	61	120	1392	156.6	6.61	1.0116	1.01469	0.999809	1.02405	0.980915	0.983589	0.971167	1.00356	1.02512	Quantified
ENSRNOP00000052124	nuclear mitotic apparatus protein 1	Numa1	pep chromosome:Rnor_6.0:1:167051209:167091453:1 gene:ENSRNOG00000000417.7 transcript:ENSRNOT00000055249.2 gene_biotype:protein_coding transcript_biotype:protein_coding gene_symbol:Numa1 description:nuclear mitotic apparatus protein 1 [Source:RGD Symbol;Acc:1308777]	31	63	63	89	2091	234.8	5.73	1.01077	1.00124	1.01307	1.01661	1.01236	0.970248	1.00571	0.982317	1.0003	Quantified
ENSRNOP00000065052	laminin subunit beta 2	Lamb2	pep chromosome:Rnor_6.0:8:117268337:117280517:1 gene:ENSRNOG00000047768.2 transcript:ENSRNOT00000072098.2 gene_biotype:protein_coding transcript_biotype:protein_coding gene_symbol:Lamb2 description:laminin subunit beta 2 [Source:RGD Symbol;Acc:2988]	33	58	58	116	1801	196.4	6.8	0.934266	1.00671	1.03384	0.994862	1.08344	1.00889	1.03591	0.972163	0.942612	Quantified
ENSRNOP00000020478	protein disulfide isomerase family A, member 3	Pdia3	pep chromosome:Rnor_6.0:3:113376983:113400707:1 gene:ENSRNOG00000015018.7 transcript:ENSRNOT00000020478.7 gene_biotype:protein_coding transcript_biotype:protein_coding gene_symbol:Pdia3 description:protein disulfide isomerase family A, member 3 [Source:RGD Symbol;Acc:68430]	68	36	36	235	510	57	6.21	1.03337	0.981971	0.992879	1.03916	0.957365	0.988977	0.989074	0.953768	1.07797	Quantified
ENSRNOP00000024430	vimentin	Vim	pep chromosome:Rnor_6.0:17:80882666:80891212:1 gene:ENSRNOG00000018087.5 transcript:ENSRNOT00000024430.5 gene_biotype:protein_coding transcript_biotype:protein_coding gene_symbol:Vim description:vimentin [Source:RGD Symbol;Acc:621646]	74	30	39	332	466	53.7	5.12	0.97477	0.96863	0.860423	0.902847	1.01746	1.0534	1.11416	1.05838	1.0661	Quantified
ENSRNOP00000003605	laminin subunit gamma 1	Lamc1	pep chromosome:Rnor_6.0:13:70658707:70783515:-1 gene:ENSRNOG00000002680.7 transcript:ENSRNOT00000003605.7 gene_biotype:protein_coding transcript_biotype:protein_coding gene_symbol:Lamc1 description:laminin subunit gamma 1 [Source:RGD Symbol;Acc:621052]	31	47	48	117	1607	177.3	5.22	0.973098	1.0589	0.972272	0.979333	1.10166	0.945432	1.03933	0.995626	0.945102	Quantified
ENSRNOP00000008518	coatomer protein complex subunit alpha	Copa	pep chromosome:Rnor_6.0:13:90467265:90508932:1 gene:ENSRNOG00000006247.7 transcript:ENSRNOT00000008518.5 gene_biotype:protein_coding transcript_biotype:protein_coding gene_symbol:Copa description:coatomer protein complex subunit alpha [Source:RGD Symbol;Acc:1310525]	44	51	51	118	1224	138.3	7.65	1.02224	0.992008	1.0068	0.996713	1.00911	1.00933	0.991496	0.986849	0.999183	Quantified
ENSRNOP00000003965	ATP synthase F1 subunit beta	Atp5f1b	pep chromosome:Rnor_6.0:7:2504695:2511749:1 gene:ENSRNOG00000002840.4 transcript:ENSRNOT00000003965.4 gene_biotype:protein_coding transcript_biotype:protein_coding gene_symbol:Atp5f1b description:ATP synthase F1 subunit beta [Source:RGD Symbol;Acc:621368]	57	21	21	278	529	56.3	5.27	0.96735	0.97057	0.949167	0.949744	1.0321	0.999892	1.0394	0.992718	1.11381	Quantified
ENSRNOP00000073523	phosphoglycerate kinase 1	Pgk1	pep chromosome:Rnor_6.0:X:77263359:77279367:1 gene:ENSRNOG00000058249.1 transcript:ENSRNOT00000077604.1 gene_biotype:protein_coding transcript_biotype:protein_coding gene_symbol:Pgk1 description:phosphoglycerate kinase 1 [Source:RGD Symbol;Acc:619878]	75	23	28	225	417	44.5	7.9	1.0034	0.944384	0.971756	0.959748	0.969514	1.1323	1.0342	0.989089	1.01339	Quantified
ENSRNOP00000037902	complement C4B (Chido blood group)	C4b	pep chromosome:Rnor_6.0:20:4302344:4316715:-1 gene:ENSRNOG00000030729.5 transcript:ENSRNOT00000031704.6 gene_biotype:protein_coding transcript_biotype:protein_coding gene_symbol:C4b description:complement C4B (Chido blood group) [Source:RGD Symbol;Acc:1591983]	30	6	49	156	1737	192	7.05	0.860195	0.871889	0.839402	1.05372	0.945222	1.19011	1.001	1.07036	1.1953	Quantified
ENSRNOP00000025064	heat shock protein family A (Hsp70) member 5	Hspa5	pep chromosome:Rnor_6.0:3:13838304:13842762:1 gene:ENSRNOG00000018294.6 transcript:ENSRNOT00000025067.6 gene_biotype:protein_coding transcript_biotype:protein_coding gene_symbol:Hspa5 description:heat shock protein family A (Hsp70) member 5 [Source:RGD Symbol;Acc:2843]	56	33	36	246	654	72.3	5.16	1.06232	0.961025	1.01248	1.00837	0.934589	1.128	0.956696	0.971954	0.982243	Quantified
ENSRNOP00000069486	inner membrane mitochondrial protein	Immt	pep chromosome:Rnor_6.0:4:99753500:99792484:1 gene:ENSRNOG00000009097.7 transcript:ENSRNOT00000086291.1 gene_biotype:protein_coding transcript_biotype:protein_coding gene_symbol:Immt description:inner membrane mitochondrial protein [Source:RGD Symbol;Acc:1310684]	53	39	39	102	776	86.2	5.85	0.966203	0.973182	0.981711	0.955727	1.02444	1.00913	1.03823	0.994141	1.07173	Quantified
ENSRNOP00000019351	lamin B1	Lmnb1	pep chromosome:Rnor_6.0:18:51785111:51822264:1 gene:ENSRNOG00000013774.5 transcript:ENSRNOT00000019351.5 gene_biotype:protein_coding transcript_biotype:protein_coding gene_symbol:Lmnb1 description:lamin B1 [Source:RGD Symbol;Acc:620522]	58	36	39	123	587	66.6	5.16	1.00778	1.02599	1.00473	0.995061	1.01863	0.904848	1.03362	0.973787	1.04613	Quantified
ENSRNOP00000073101	actin alpha 2, smooth muscle	Acta2	pep chromosome:Rnor_6.0:1:252537615:252550394:-1 gene:ENSRNOG00000058039.1 transcript:ENSRNOT00000083468.1 gene_biotype:protein_coding transcript_biotype:protein_coding gene_symbol:Acta2 description:actin alpha 2, smooth muscle [Source:RGD Symbol;Acc:621676]	61	9	18	674	376	41.9	5.39	1.0064	1.07019	0.974697	0.978514	1.05117	1.00489	1.05688	0.945797	0.923134	Quantified
ENSRNOP00000058007	inter-alpha-trypsin inhibitor heavy chain 4	Itih4	pep chromosome:Rnor_6.0:16:6970342:6985579:1 gene:ENSRNOG00000017381.8 transcript:ENSRNOT00000061294.4 gene_biotype:protein_coding transcript_biotype:protein_coding gene_symbol:Itih4 description:inter-alpha-trypsin inhibitor heavy chain 4 [Source:RGD Symbol;Acc:70881]	39	35	35	175	933	103.7	6.2	0.921312	0.993456	0.922448	1.22022	0.987096	1.02848	0.89423	1.03411	1.01961	Quantified
ENSRNOP00000048598	small nuclear ribonucleoprotein U5 subunit 200	Snrnp200	pep chromosome:Rnor_6.0:3:119640298:119669639:1 gene:ENSRNOG00000012157.7 transcript:ENSRNOT00000043895.4 gene_biotype:protein_coding transcript_biotype:protein_coding gene_symbol:Snrnp200 description:small nuclear ribonucleoprotein U5 subunit 200 [Source:RGD Symbol;Acc:1561120]	27	54	54	110	2136	244.4	6.06	1.0044	1.00126	1.00882	1.01181	1.00183	0.95488	1.01209	0.982418	1.03514	Quantified
ENSRNOP00000075269	tubulin, beta 5 class I	Tubb5	pep chromosome:Rnor_6.0:20:3422489:3426371:1 gene:ENSRNOG00000061216.1 transcript:ENSRNOT00000079854.1 gene_biotype:protein_coding transcript_biotype:protein_coding gene_symbol:Tubb5 description:tubulin, beta 5 class I [Source:RGD Symbol;Acc:628596]	73	2	22	338	444	49.6	4.89	1.01312	1.03642	0.990949	1.00377	0.991479	0.951007	0.98869	0.998342	1.03942	Quantified
ENSRNOP00000063484	eukaryotic translation initiation factor 3, subunit A	Eif3a	pep chromosome:Rnor_6.0:1:282139823:282170017:-1 gene:ENSRNOG00000010117.7 transcript:ENSRNOT00000066947.3 gene_biotype:protein_coding transcript_biotype:protein_coding gene_symbol:Eif3a description:eukaryotic translation initiation factor 3, subunit A [Source:RGD Symbol;Acc:1307269]	40	65	65	134	1354	163.1	6.77	1.02811	0.989798	1.02914	0.987531	1.00299	1.01488	1.00338	0.984914	0.972396	Quantified
ENSRNOP00000034846	heat shock protein 90 beta family member 1	Hsp90b1	pep chromosome:Rnor_6.0:7:27226569:27240528:-1 gene:ENSRNOG00000026963.6 transcript:ENSRNOT00000029435.5 gene_biotype:protein_coding transcript_biotype:protein_coding gene_symbol:Hsp90b1 description:heat shock protein 90 beta family member 1 [Source:RGD Symbol;Acc:1310482]	46	38	39	254	804	92.8	4.81	1.08873	0.969648	0.990399	1.06599	0.918692	1.08882	0.933749	0.957844	1.0035	Quantified
ENSRNOP00000029578	nicotinamide nucleotide transhydrogenase	Nnt	pep chromosome:Rnor_6.0:2:52189529:52282548:-1 gene:ENSRNOG00000026842.5 transcript:ENSRNOT00000033627.3 gene_biotype:protein_coding transcript_biotype:protein_coding gene_symbol:Nnt description:nicotinamide nucleotide transhydrogenase [Source:RGD Symbol;Acc:1587346]	38	37	37	159	1086	113.8	7.88	0.958459	0.980493	1.01094	1.00176	1.02369	0.95691	1.02011	1.00261	1.0584	Quantified
ENSRNOP00000023460	microtubule-associated protein 1B	Map1b	pep chromosome:Rnor_6.0:2:29675391:29768750:-1 gene:ENSRNOG00000017428.5 transcript:ENSRNOT00000023460.5 gene_biotype:protein_coding transcript_biotype:protein_coding gene_symbol:Map1b description:microtubule-associated protein 1B [Source:RGD Symbol;Acc:3043]	24	52	53	98	2461	269.5	4.81	0.973934	0.950236	1.00899	0.973215	1.00492	1.04775	1.01365	1.01803	1.02498	Quantified
ENSRNOP00000045650	ATPase Na+/K+ transporting subunit alpha 1	Atp1a1	pep chromosome:Rnor_6.0:2:204003742:204032023:-1 gene:ENSRNOG00000030019.4 transcript:ENSRNOT00000040430.4 gene_biotype:protein_coding transcript_biotype:protein_coding gene_symbol:Atp1a1 description:ATPase Na+/K+ transporting subunit alpha 1 [Source:RGD Symbol;Acc:2167]	41	28	41	103	1023	113	5.45	0.992524	0.987009	1.00274	0.990859	1.02061	0.984358	1.01825	0.987602	1.02931	Quantified
ENSRNOP00000062172	translocated promoter region, nuclear basket protein	Tpr	pep chromosome:Rnor_6.0:13:67611708:67672827:1 gene:ENSRNOG00000002394.6 transcript:ENSRNOT00000063833.2 gene_biotype:protein_coding transcript_biotype:protein_coding gene_symbol:Tpr description:translocated promoter region, nuclear basket protein [Source:RGD Symbol;Acc:1310664]	26	61	61	85	2360	267.1	5	0.966365	0.992977	0.96153	1.04112	1.00548	0.990379	1.00185	1.0133	1.04254	Quantified
ENSRNOP00000001679	collagen type VI alpha 1 chain	Col6a1	pep chromosome:Rnor_6.0:20:12658065:12675561:1 gene:ENSRNOG00000001249.8 transcript:ENSRNOT00000001679.7 gene_biotype:protein_coding transcript_biotype:protein_coding gene_symbol:Col6a1 description:collagen type VI alpha 1 chain [Source:RGD Symbol;Acc:1565398]	34	29	29	167	1025	108.7	5.36	0.810417	1.07797	0.873101	1.1015	1.07137	1.06082	1.06163	1.07027	0.892248	Quantified
ENSRNOP00000010831	cytochrome P450, family 11, subfamily a, polypeptide 1	Cyp11a1	pep chromosome:Rnor_6.0:8:62779875:62809893:1 gene:ENSRNOG00000008074.6 transcript:ENSRNOT00000010831.6 gene_biotype:protein_coding transcript_biotype:protein_coding gene_symbol:Cyp11a1 description:cytochrome P450, family 11, subfamily a, polypeptide 1 [Source:RGD Symbol;Acc:69325]	51	23	23	597	490	57	9.2	0.926587	1.01014	0.931588	0.980535	1.01642	0.940484	1.07647	1.02086	1.11105	Quantified
ENSRNOP00000068883	collagen type VI alpha 5 chain	Col6a5	pep chromosome:Rnor_6.0:8:114529016:114617466:-1 gene:ENSRNOG00000010663.6 transcript:ENSRNOT00000082992.1 gene_biotype:protein_coding transcript_biotype:protein_coding gene_symbol:Col6a5 description:collagen type VI alpha 5 chain [Source:RGD Symbol;Acc:1565804]	20	46	52	91	2632	288.8	6.39	0.826245	1.24404	0.808723	1.07847	1.05777	1.08715	0.888558	1.07123	0.96145	Quantified
ENSRNOP00000060140	acetyl-CoA acyltransferase 2	Acaa2	pep chromosome:Rnor_6.0:18:70733872:70762395:1 gene:ENSRNOG00000013766.7 transcript:ENSRNOT00000067018.3 gene_biotype:protein_coding transcript_biotype:protein_coding gene_symbol:Acaa2 description:acetyl-CoA acyltransferase 2 [Source:RGD Symbol;Acc:620482]	78	21	21	185	397	41.9	8.15	0.924223	1.00912	0.960328	0.955158	1.07338	0.991023	1.01863	1.04023	1.04264	Quantified
ENSRNOP00000013863	tubulin, beta 4B class IVb	Tubb4b	pep chromosome:Rnor_6.0:3:2441733:2444281:-1 gene:ENSRNOG00000010170.5 transcript:ENSRNOT00000013863.5 gene_biotype:protein_coding transcript_biotype:protein_coding gene_symbol:Tubb4b description:tubulin, beta 4B class IVb [Source:RGD Symbol;Acc:735101]	59	1	21	319	548	61.1	4.86	0.954522	1.015	1.04441	1.03791	0.992887	0.975988	0.989379	1.00557	0.998593	Quantified
ENSRNOP00000018328	transglutaminase 2	Tgm2	pep chromosome:Rnor_6.0:3:154597168:154627257:-1 gene:ENSRNOG00000012956.6 transcript:ENSRNOT00000018328.5 gene_biotype:protein_coding transcript_biotype:protein_coding gene_symbol:Tgm2 description:transglutaminase 2 [Source:RGD Symbol;Acc:621081]	50	32	32	141	686	76.9	5.1	1.05361	1.03311	1.01784	0.990154	1.01231	0.997911	1.0087	0.959307	0.938721	Quantified
ENSRNOP00000075010	ceruloplasmin	Cp	pep chromosome:Rnor_6.0:2:104744476:104799853:1 gene:ENSRNOG00000011913.7 transcript:ENSRNOT00000082627.1 gene_biotype:protein_coding transcript_biotype:protein_coding gene_symbol:Cp description:ceruloplasmin [Source:RGD Symbol;Acc:2387]	36	35	35	165	1084	123.6	5.68	0.943683	1.00304	0.935204	1.1663	0.977806	1.00382	0.917739	1.08645	0.98525	Quantified
ENSRNOP00000012996	dihydropyrimidinase-like 2	Dpysl2	pep chromosome:Rnor_6.0:15:43477629:43542939:-1 gene:ENSRNOG00000009625.6 transcript:ENSRNOT00000012996.6 gene_biotype:protein_coding transcript_biotype:protein_coding gene_symbol:Dpysl2 description:dihydropyrimidinase-like 2 [Source:RGD Symbol;Acc:2517]	63	23	27	134	572	62.2	6.38	0.937916	1.02661	0.956973	0.981312	1.05159	0.948244	1.0325	1.01612	1.0623	Quantified
ENSRNOP00000068603	tubulin, alpha 1C	Tuba1c	pep chromosome:Rnor_6.0:7:140716113:140723714:1 gene:ENSRNOG00000021438.3 transcript:ENSRNOT00000033450.3 gene_biotype:protein_coding transcript_biotype:protein_coding gene_symbol:Tuba1c description:tubulin, alpha 1C [Source:RGD Symbol;Acc:1307226]	58	4	21	344	449	49.9	5.1	1.02249	1.03428	0.990407	1.0253	0.969151	0.937323	0.974505	0.999647	1.06039	Quantified
ENSRNOP00000033950	ubiquitin-like modifier activating enzyme 1	Uba1	pep chromosome:Rnor_6.0:X:1723174:1741701:-1 gene:ENSRNOG00000019164.7 transcript:ENSRNOT00000031115.4 gene_biotype:protein_coding transcript_biotype:protein_coding gene_symbol:Uba1 description:ubiquitin-like modifier activating enzyme 1 [Source:RGD Symbol;Acc:1359327]	42	36	36	136	1058	117.7	5.57	1.02983	1.01994	1.01925	1.00927	0.992682	0.996444	0.975024	0.973548	0.997528	Quantified
ENSRNOP00000065882	aldehyde dehydrogenase 1 family, member L1	Aldh1l1	pep chromosome:Rnor_6.0:4:123516788:123557501:-1 gene:ENSRNOG00000047023.2 transcript:ENSRNOT00000075042.2 gene_biotype:protein_coding transcript_biotype:protein_coding gene_symbol:Aldh1l1 description:aldehyde dehydrogenase 1 family, member L1 [Source:RGD Symbol;Acc:621294]	43	33	38	96	907	99.1	5.54	0.973128	0.985397	0.967905	0.922013	0.986072	1.03459	1.03841	1.04039	1.068	Quantified
ENSRNOP00000068359	moesin	Msn	pep chromosome:Rnor_6.0:X:65226748:65295810:1 gene:ENSRNOG00000030118.7 transcript:ENSRNOT00000076181.1 gene_biotype:protein_coding transcript_biotype:protein_coding gene_symbol:Msn description:moesin [Source:RGD Symbol;Acc:621260]	52	26	38	159	577	67.8	6.47	1.0516	1.08372	1.01279	0.97376	0.962211	0.960116	0.995605	0.982836	0.989432	Quantified
ENSRNOP00000071884	tenascin C	Tnc	pep chromosome:Rnor_6.0:5:79789671:79874671:-1 gene:ENSRNOG00000058645.1 transcript:ENSRNOT00000084563.1 gene_biotype:protein_coding transcript_biotype:protein_coding gene_symbol:Tnc description:tenascin C [Source:RGD Symbol;Acc:621057]	24	44	44	89	2019	221.6	4.92	1.21237	1.08204	0.815581	0.994146	0.892336	1.14624	1.08021	0.889643	0.902685	Quantified
ENSRNOP00000023611	tubulin, beta 2A class IIa	Tubb2a	pep chromosome:Rnor_6.0:17:31493107:31496825:1 gene:ENSRNOG00000017558.6 transcript:ENSRNOT00000023611.6 gene_biotype:protein_coding transcript_biotype:protein_coding gene_symbol:Tubb2a description:tubulin, beta 2A class IIa [Source:RGD Symbol;Acc:1588452]	65	1	21	304	445	49.9	4.89	1.01932	1.00617	0.971574	0.966139	0.968347	0.983241	1.0186	1.0045	1.0763	Quantified
ENSRNOP00000013608	eukaryotic translation elongation factor 1 alpha 1	Eef1a1	pep chromosome:Rnor_6.0:8:85838869:85840818:-1 gene:ENSRNOG00000009439.6 transcript:ENSRNOT00000013608.6 gene_biotype:protein_coding transcript_biotype:protein_coding gene_symbol:Eef1a1 description:eukaryotic translation elongation factor 1 alpha 1 [Source:RGD Symbol;Acc:67387]	56	22	22	266	462	50.1	9.01	1.07651	0.972054	1.02475	1.02521	0.938241	1.07803	0.980102	0.953082	0.967335	Quantified
ENSRNOP00000038073	hydroxyacyl-CoA dehydrogenase trifunctional multienzyme complex subunit alpha	Hadha	pep chromosome:Rnor_6.0:6:27589657:27629175:1 gene:ENSRNOG00000024629.6 transcript:ENSRNOT00000038649.6 gene_biotype:protein_coding transcript_biotype:protein_coding gene_symbol:Hadha description:hydroxyacyl-CoA dehydrogenase trifunctional multienzyme complex subunit alpha [Source:RGD Symbol;Acc:620512]	51	33	33	163	763	82.6	9.06	0.984786	0.917693	0.953936	0.962172	1.01716	0.922801	1.05496	1.03803	1.1615	Quantified
ENSRNOP00000030667	ubiquitin-like modifier activating enzyme 6	Uba6	pep chromosome:Rnor_6.0:14:23507628:23571446:1 gene:ENSRNOG00000021931.5 transcript:ENSRNOT00000037509.5 gene_biotype:protein_coding transcript_biotype:protein_coding gene_symbol:Uba6 description:ubiquitin-like modifier activating enzyme 6 [Source:RGD Symbol;Acc:1308324]	42	37	37	89	1053	117.9	6.07	1.00948	1.01039	0.950851	1.01185	0.962958	1.0131	0.984368	0.989144	1.08414	Quantified
ENSRNOP00000075248	ferredoxin reductase	Fdxr	pep chromosome:Rnor_6.0:10:103817704:103826448:-1 gene:ENSRNOG00000058497.1 transcript:ENSRNOT00000085636.1 gene_biotype:protein_coding transcript_biotype:protein_coding gene_symbol:Fdxr description:ferredoxin reductase [Source:RGD Symbol;Acc:621648]	70	29	29	214	494	54.3	9.23	0.906858	0.953908	0.894231	0.872902	1.06294	1.09385	1.08996	1.02169	1.12143	Quantified
ENSRNOP00000015886	chaperonin containing TCP1 subunit 5	Cct5	pep chromosome:Rnor_6.0:2:84667633:84678790:-1 gene:ENSRNOG00000011632.6 transcript:ENSRNOT00000015886.6 gene_biotype:protein_coding transcript_biotype:protein_coding gene_symbol:Cct5 description:chaperonin containing TCP1 subunit 5 [Source:RGD Symbol;Acc:735161]	54	30	30	129	541	59.5	5.72	1.04202	1.00319	1.00874	1.02378	0.965596	0.98293	0.997524	0.979105	1.01046	Quantified
ENSRNOP00000022892	ATP synthase F1 subunit alpha	Atp5f1a	pep chromosome:Rnor_6.0:18:74156553:74164495:1 gene:ENSRNOG00000017032.5 transcript:ENSRNOT00000022892.5 gene_biotype:protein_coding transcript_biotype:protein_coding gene_symbol:Atp5f1a description:ATP synthase F1 subunit alpha [Source:RGD Symbol;Acc:619993]	55	28	28	256	553	59.8	9.26	0.979971	0.978656	0.950602	0.95592	1.01859	1.00835	1.02345	1.00923	1.09039	Quantified
ENSRNOP00000073323	tubulin, beta 2B class IIb	Tubb2b	pep chromosome:Rnor_6.0:17:31441630:31482759:1 gene:ENSRNOG00000017445.5 transcript:ENSRNOT00000083705.1 gene_biotype:protein_coding transcript_biotype:protein_coding gene_symbol:Tubb2b description:tubulin, beta 2B class IIb [Source:RGD Symbol;Acc:1309427]	65	1	21	298	445	49.9	4.89	0.999336	0.985822	1.03801	0.993029	0.998247	1.00491	1.01558	1.02539	0.953048	Quantified
ENSRNOP00000032108	heterogeneous nuclear ribonucleoprotein M	Hnrnpm	pep chromosome:Rnor_6.0:7:18516512:18554227:-1 gene:ENSRNOG00000007921.8 transcript:ENSRNOT00000036172.6 gene_biotype:protein_coding transcript_biotype:protein_coding gene_symbol:Hnrnpm description:heterogeneous nuclear ribonucleoprotein M [Source:RGD Symbol;Acc:620369]	55	39	40	152	729	77.6	8.63	0.986588	1.00721	0.994633	1.02007	0.992482	0.91026	1.01654	1.01346	1.07131	Quantified
ENSRNOP00000008728	protein disulfide isomerase family A, member 4	Pdia4	pep chromosome:Rnor_6.0:4:77470636:77489535:-1 gene:ENSRNOG00000006228.5 transcript:ENSRNOT00000008728.5 gene_biotype:protein_coding transcript_biotype:protein_coding gene_symbol:Pdia4 description:protein disulfide isomerase family A, member 4 [Source:RGD Symbol;Acc:619835]	49	33	33	133	643	72.7	5.15	1.07887	1.00264	1.05324	0.962544	0.946703	0.980435	0.994263	0.974934	1.01836	Quantified
ENSRNOP00000032156	ubiquitin protein ligase E3 component n-recognin 4	Ubr4	pep chromosome:Rnor_6.0:5:157848206:157955991:1 gene:ENSRNOG00000018183.7 transcript:ENSRNOT00000039663.5 gene_biotype:protein_coding transcript_biotype:protein_coding gene_symbol:Ubr4 description:ubiquitin protein ligase E3 component n-recognin 4 [Source:RGD Symbol;Acc:1563121]	11	58	58	85	5194	573.4	6.05	0.991028	0.99785	0.99866	1.00107	1.00358	1.05076	0.995858	1.02252	0.954224	Quantified
ENSRNOP00000004797	tubulin, alpha 4A	Tuba4a	pep chromosome:Rnor_6.0:9:82415605:82419288:-1 gene:ENSRNOG00000003597.5 transcript:ENSRNOT00000004797.5 gene_biotype:protein_coding transcript_biotype:protein_coding gene_symbol:Tuba4a description:tubulin, alpha 4A [Source:RGD Symbol;Acc:1359623]	58	5	21	262	448	49.9	5.06	1.06868	1.07066	1.00417	1.02764	0.935359	0.866105	0.950077	1.02331	1.06556	Quantified
ENSRNOP00000021840	insulin-like growth factor 2 receptor	Igf2r	pep chromosome:Rnor_6.0:1:48176106:48264477:1 gene:ENSRNOG00000014997.4 transcript:ENSRNOT00000021840.4 gene_biotype:protein_coding transcript_biotype:protein_coding gene_symbol:Igf2r description:insulin-like growth factor 2 receptor [Source:RGD Symbol;Acc:2871]	20	49	49	76	2481	273.4	5.71	1.03465	0.954671	0.927894	0.973483	0.967035	1.13408	0.981647	1.00762	1.03796	Quantified
ENSRNOP00000020322	isocitrate dehydrogenase (NADP(+)) 1	Idh1	pep chromosome:Rnor_6.0:9:71882105:71900044:-1 gene:ENSRNOG00000015020.7 transcript:ENSRNOT00000020322.5 gene_biotype:protein_coding transcript_biotype:protein_coding gene_symbol:Idh1 description:isocitrate dehydrogenase (NADP(+)) 1 [Source:RGD Symbol;Acc:2862]	65	26	27	283	414	46.7	6.99	0.967851	1.02481	0.862196	0.905261	1.01356	0.97019	1.06005	1.03667	1.17487	Quantified
ENSRNOP00000074707	high density lipoprotein binding protein	Hdlbp	pep chromosome:Rnor_6.0:9:100554563:100588951:-1 gene:ENSRNOG00000031479.4 transcript:ENSRNOT00000085448.1 gene_biotype:protein_coding transcript_biotype:protein_coding gene_symbol:Hdlbp description:high density lipoprotein binding protein [Source:RGD Symbol;Acc:620962]	37	44	44	109	1268	141.6	6.95	1.03803	0.978901	1.00991	0.99631	0.971524	1.01743	0.99324	0.99039	1.01859	Quantified
ENSRNOP00000010720	cullin-associated and neddylation-dissociated 1	Cand1	pep chromosome:Rnor_6.0:7:62124362:62162453:-1 gene:ENSRNOG00000007834.5 transcript:ENSRNOT00000010720.3 gene_biotype:protein_coding transcript_biotype:protein_coding gene_symbol:Cand1 description:cullin-associated and neddylation-dissociated 1 [Source:RGD Symbol;Acc:620479]	32	38	40	113	1230	136.3	5.78	1.00756	1.04594	0.957079	1.01742	0.989313	0.967964	0.996631	1.0077	1.02454	Quantified
ENSRNOP00000061853	spectrin, alpha, erythrocytic 1	Spta1	pep chromosome:Rnor_6.0:13:92264231:92340083:1 gene:ENSRNOG00000003537.8 transcript:ENSRNOT00000066509.4 gene_biotype:protein_coding transcript_biotype:protein_coding gene_symbol:Spta1 description:spectrin, alpha, erythrocytic 1 [Source:RGD Symbol;Acc:1305194]	24	51	52	74	2416	279.9	5.03	0.965446	0.929719	0.977139	1.03575	1.00191	1.1565	0.953436	1.02781	0.972626	Quantified
ENSRNOP00000071968	malic enzyme 1	Me1	pep chromosome:Rnor_6.0:8:94258198:94368834:-1 gene:ENSRNOG00000009715.6 transcript:ENSRNOT00000078977.1 gene_biotype:protein_coding transcript_biotype:protein_coding gene_symbol:Me1 description:malic enzyme 1 [Source:RGD Symbol;Acc:3074]	51	24	24	148	571	63.8	6.67	0.912091	1.05104	0.999164	0.993639	1.07057	0.83651	0.988451	1.10467	1.05537	Quantified
ENSRNOP00000061368	DExH-box helicase 9	Dhx9	pep chromosome:Rnor_6.0:13:70885504:70922245:-1 gene:ENSRNOG00000002735.6 transcript:ENSRNOT00000064860.1 gene_biotype:protein_coding transcript_biotype:protein_coding gene_symbol:Dhx9 description:DExH-box helicase 9 [Source:RGD Symbol;Acc:1308548]	37	39	39	95	1174	131.6	6.35	1.01184	1.00095	0.998428	1.01139	0.989898	0.946653	1.02247	0.978234	1.05266	Quantified
ENSRNOP00000074084	laminin subunit alpha 5	Lama5	pep chromosome:Rnor_6.0:3:175553045:175601127:-1 gene:ENSRNOG00000053691.1 transcript:ENSRNOT00000081226.1 gene_biotype:protein_coding transcript_biotype:protein_coding gene_symbol:Lama5 description:laminin subunit alpha 5 [Source:RGD Symbol;Acc:621023]	15	45	45	76	3713	403.5	6.68	1.00193	1.04071	1.02464	0.992895	1.0127	1.01099	1.02948	0.999848	0.899431	Quantified
ENSRNOP00000060992	adaptor related protein complex 2 subunit alpha 2	Ap2a2	pep chromosome:Rnor_6.0:1:214534284:214606169:1 gene:ENSRNOG00000019534.7 transcript:ENSRNOT00000064254.2 gene_biotype:protein_coding transcript_biotype:protein_coding gene_symbol:Ap2a2 description:adaptor related protein complex 2 subunit alpha 2 [Source:RGD Symbol;Acc:71015]	44	1	39	109	939	104.1	6.83	1.0299	1.00718	0.98	0.973476	0.97548	1.01292	1.01081	0.997164	1.02743	Quantified
ENSRNOP00000020558	UDP-glucose glycoprotein glucosyltransferase 1	Uggt1	pep chromosome:Rnor_6.0:9:42692105:42805673:-1 gene:ENSRNOG00000014901.5 transcript:ENSRNOT00000020558.5 gene_biotype:protein_coding transcript_biotype:protein_coding gene_symbol:Uggt1 description:UDP-glucose glycoprotein glucosyltransferase 1 [Source:RGD Symbol;Acc:619710]	29	38	38	75	1551	176.3	5.66	0.995132	1.02975	1.05852	0.999033	0.983593	0.980594	0.982894	0.993244	0.990512	Quantified
ENSRNOP00000023370	plasminogen	Plg	pep chromosome:Rnor_6.0:1:48521772:48563776:-1 gene:ENSRNOG00000017223.7 transcript:ENSRNOT00000023368.5 gene_biotype:protein_coding transcript_biotype:protein_coding gene_symbol:Plg description:plasminogen [Source:RGD Symbol;Acc:619893]	48	36	36	127	812	90.5	7.08	0.948837	0.993961	0.977172	0.991455	0.937371	1.08828	0.947744	1.07468	1.06097	Quantified
ENSRNOP00000064663		AABR07052523.1	pep chromosome:Rnor_6.0:3:59408546:59410211:1 gene:ENSRNOG00000028543.2 transcript:ENSRNOT00000031418.2 gene_biotype:protein_coding transcript_biotype:protein_coding gene_symbol:AABR07052523.1	64	16	21	156	434	47	6.37	0.992773	0.965133	1.01002	1.04306	1.0162	1.03304	1.00325	1.0126	0.938614	Quantified
ENSRNOP00000072797	coatomer protein complex, subunit beta 1	Copb1	pep chromosome:Rnor_6.0:1:183695481:183729569:-1 gene:ENSRNOG00000057623.1 transcript:ENSRNOT00000083293.1 gene_biotype:protein_coding transcript_biotype:protein_coding gene_symbol:Copb1 description:coatomer protein complex, subunit beta 1 [Source:RGD Symbol;Acc:620861]	37	32	32	73	953	106.9	5.96	1.03591	0.996989	1.02081	1.00645	1.00248	1.00977	0.987343	0.974566	0.978973	Quantified
ENSRNOP00000021862	transketolase	Tkt	pep chromosome:Rnor_6.0:16:6609668:6634595:1 gene:ENSRNOG00000016064.6 transcript:ENSRNOT00000021862.6 gene_biotype:protein_coding transcript_biotype:protein_coding gene_symbol:Tkt description:transketolase [Source:RGD Symbol;Acc:621036]	46	27	27	146	655	71.1	7.62	0.991173	0.993744	1.00806	1.00436	1.02442	0.971918	1.00047	1.00834	1.01072	Quantified
ENSRNOP00000074852	adaptor related protein complex 2 subunit alpha 2	Ap2a2	pep chromosome:Rnor_6.0:1:214562897:214605841:1 gene:ENSRNOG00000019534.7 transcript:ENSRNOT00000085125.1 gene_biotype:protein_coding transcript_biotype:protein_coding gene_symbol:Ap2a2 description:adaptor related protein complex 2 subunit alpha 2 [Source:RGD Symbol;Acc:71015]	44	1	38	104	915	101.5	7.08	0.995424	0.997445	1.0024	0.987314	0.989326	0.991077	1.02374	1.01676	1.01035	Quantified
ENSRNOP00000025824	chaperonin containing TCP1 subunit 3	Cct3	pep chromosome:Rnor_6.0:2:187668796:187693610:1 gene:ENSRNOG00000019090.6 transcript:ENSRNOT00000025824.6 gene_biotype:protein_coding transcript_biotype:protein_coding gene_symbol:Cct3 description:chaperonin containing TCP1 subunit 3 [Source:RGD Symbol;Acc:735038]	55	30	30	129	545	60.6	6.64	1.02915	1.01529	1.01571	1.01901	0.987827	0.980245	0.993061	0.971506	1.0012	Quantified
ENSRNOP00000051841	prolyl 4-hydroxylase subunit beta	P4hb	pep chromosome:Rnor_6.0:10:109736458:109747987:-1 gene:ENSRNOG00000036689.2 transcript:ENSRNOT00000054958.2 gene_biotype:protein_coding transcript_biotype:protein_coding gene_symbol:P4hb description:prolyl 4-hydroxylase subunit beta [Source:RGD Symbol;Acc:3244]	58	30	30	186	509	56.9	4.93	1.07271	0.99152	0.968806	1.02262	0.947411	1.03279	1.0036	0.972655	1.00261	Quantified
ENSRNOP00000026860	desmin	Des	pep chromosome:Rnor_6.0:9:82556573:82564294:1 gene:ENSRNOG00000019810.4 transcript:ENSRNOT00000026860.4 gene_biotype:protein_coding transcript_biotype:protein_coding gene_symbol:Des description:desmin [Source:RGD Symbol;Acc:620686]	67	27	32	166	469	53.4	5.27	0.916137	1.17721	0.925	1.05056	1.08815	0.914656	1.12954	1.00153	0.80704	Quantified
ENSRNOP00000003349	nidogen 1	Nid1	pep chromosome:Rnor_6.0:17:90553394:90627101:-1 gene:ENSRNOG00000002461.7 transcript:ENSRNOT00000003349.7 gene_biotype:protein_coding transcript_biotype:protein_coding gene_symbol:Nid1 description:nidogen 1 [Source:RGD Symbol;Acc:3178]	32	32	33	120	1246	137	5.47	0.988282	1.01923	0.959934	0.996417	1.01922	0.961248	1.02999	1.02818	1.01078	Quantified
ENSRNOP00000001816	aldehyde dehydrogenase 2 family member	Aldh2	pep chromosome:Rnor_6.0:12:40466495:40498752:1 gene:ENSRNOG00000001344.7 transcript:ENSRNOT00000001816.6 gene_biotype:protein_coding transcript_biotype:protein_coding gene_symbol:Aldh2 description:aldehyde dehydrogenase 2 family member [Source:RGD Symbol;Acc:69219]	55	22	24	191	519	56.5	7.33	0.895557	0.988468	1.07609	1.05737	0.994083	0.898015	1.00274	1.08234	1.01879	Quantified
ENSRNOP00000009028	spectrin, beta, erythrocytic	Sptb	pep chromosome:Rnor_6.0:6:99659651:99783047:-1 gene:ENSRNOG00000006911.7 transcript:ENSRNOT00000009028.7 gene_biotype:protein_coding transcript_biotype:protein_coding gene_symbol:Sptb description:spectrin, beta, erythrocytic [Source:RGD Symbol;Acc:1303243]	20	41	48	80	2329	267.9	5.45	0.965611	0.944945	0.962484	1.02014	1.00077	1.12378	0.983107	1.03693	0.981456	Quantified
ENSRNOP00000024347	ATPase sarcoplasmic/endoplasmic reticulum Ca2+ transporting 2	Atp2a2	pep chromosome:Rnor_6.0:12:39554171:39601778:1 gene:ENSRNOG00000001285.8 transcript:ENSRNOT00000024347.7 gene_biotype:protein_coding transcript_biotype:protein_coding gene_symbol:Atp2a2 description:ATPase sarcoplasmic/endoplasmic reticulum Ca2+ transporting 2 [Source:RGD Symbol;Acc:2174]	35	1	33	111	1043	114.7	5.34	1.00651	1.02845	1.00975	1.02121	0.999244	1.01762	0.98011	0.988624	0.962909	Quantified
ENSRNOP00000039152	tubulin, alpha 3B	Tuba3b	pep chromosome:Rnor_6.0:4:179905116:179910704:1 gene:ENSRNOG00000032967.3 transcript:ENSRNOT00000052352.3 gene_biotype:protein_coding transcript_biotype:protein_coding gene_symbol:Tuba3b description:tubulin, alpha 3B [Source:RGD Symbol;Acc:1565155]	51	1	18	300	450	49.9	5.1	0.901024	0.969188	1.03231	1.04616	1.11854	0.9361	1.02663	1.02934	0.952534	Quantified
ENSRNOP00000066618	lon peptidase 1, mitochondrial	Lonp1	pep chromosome:Rnor_6.0:9:10428853:10441177:1 gene:ENSRNOG00000046502.1 transcript:ENSRNOT00000074253.1 gene_biotype:protein_coding transcript_biotype:protein_coding gene_symbol:Lonp1 description:lon peptidase 1, mitochondrial [Source:RGD Symbol;Acc:621598]	34	30	30	110	950	105.7	6.6	0.996289	0.990476	0.941744	0.967652	1.0152	0.993086	1.03163	0.995557	1.08275	Quantified
ENSRNOP00000016449	kinectin 1	Ktn1	pep chromosome:Rnor_6.0:15:24479761:24553197:1 gene:ENSRNOG00000012255.8 transcript:ENSRNOT00000016449.8 gene_biotype:protein_coding transcript_biotype:protein_coding gene_symbol:Ktn1 description:kinectin 1 [Source:RGD Symbol;Acc:1308719]	31	44	44	74	1325	151.7	6.01	0.995237	0.989582	1.03213	0.997586	1.00431	0.985513	1.00146	0.98893	1.01859	Quantified
ENSRNOP00000024973	acyl-CoA dehydrogenase, very long chain	Acadvl	pep chromosome:Rnor_6.0:10:56619303:56624526:-1 gene:ENSRNOG00000018114.7 transcript:ENSRNOT00000024973.6 gene_biotype:protein_coding transcript_biotype:protein_coding gene_symbol:Acadvl description:acyl-CoA dehydrogenase, very long chain [Source:RGD Symbol;Acc:2014]	58	32	32	88	655	70.8	8.81	0.965514	0.966369	0.964835	0.951459	1.03412	1.02624	1.01695	1.03129	1.05877	Quantified
ENSRNOP00000011166	ATP binding cassette subfamily B member 4	Abcb4	pep chromosome:Rnor_6.0:4:22339831:22425381:-1 gene:ENSRNOG00000008012.7 transcript:ENSRNOT00000011166.5 gene_biotype:protein_coding transcript_biotype:protein_coding gene_symbol:Abcb4 description:ATP binding cassette subfamily B member 4 [Source:RGD Symbol;Acc:620248]	33	22	43	80	1272	140.2	8.62	0.833539	0.956789	0.879962	0.870255	1.11411	0.96055	1.03366	1.06696	1.30154	Quantified
ENSRNOP00000001738	ATPase sarcoplasmic/endoplasmic reticulum Ca2+ transporting 2	Atp2a2	pep chromosome:Rnor_6.0:12:39553903:39603326:1 gene:ENSRNOG00000001285.8 transcript:ENSRNOT00000001738.7 gene_biotype:protein_coding transcript_biotype:protein_coding gene_symbol:Atp2a2 description:ATPase sarcoplasmic/endoplasmic reticulum Ca2+ transporting 2 [Source:RGD Symbol;Acc:2174]	36	1	33	110	997	109.6	5.36	0.963523	1.0017	0.9726	0.948561	1.10355	0.941322	1.03187	0.979878	1.06851	Quantified
ENSRNOP00000002169	chaperonin containing TCP1 subunit 8	Cct8	pep chromosome:Rnor_6.0:11:27130172:27141881:-1 gene:ENSRNOG00000001592.6 transcript:ENSRNOT00000002169.6 gene_biotype:protein_coding transcript_biotype:protein_coding gene_symbol:Cct8 description:chaperonin containing TCP1 subunit 8 [Source:RGD Symbol;Acc:1305452]	61	31	31	128	548	59.6	5.54	1.03667	0.994864	1.0272	1.04574	0.974572	0.987951	0.99014	0.983369	0.97274	Quantified
ENSRNOP00000073619	adaptor related protein complex 2 subunit beta 1	Ap2b1	pep chromosome:Rnor_6.0:10:70520254:70621977:1 gene:ENSRNOG00000061543.1 transcript:ENSRNOT00000090446.1 gene_biotype:protein_coding transcript_biotype:protein_coding gene_symbol:Ap2b1 description:adaptor related protein complex 2 subunit beta 1 [Source:RGD Symbol;Acc:71048]	38	19	38	94	951	105.6	5.34	1.02832	0.98904	0.965142	0.983183	0.982761	1.01078	1.00309	1.00386	1.04863	Quantified
ENSRNOP00000069540	aldolase, fructose-bisphosphate A	Aldoa	pep chromosome:Rnor_6.0:1:198228387:198233588:-1 gene:ENSRNOG00000052802.1 transcript:ENSRNOT00000088473.1 gene_biotype:protein_coding transcript_biotype:protein_coding gene_symbol:Aldoa description:aldolase, fructose-bisphosphate A [Source:RGD Symbol;Acc:2089]	80	22	26	150	364	39.3	8.09	0.990791	1.01109	0.976529	1.04349	0.994437	1.00753	0.988534	0.998126	1.00481	Quantified
ENSRNOP00000020304	adaptor related protein complex 2 subunit alpha 1	Ap2a1	pep chromosome:Rnor_6.0:1:100896947:100926335:-1 gene:ENSRNOG00000026243.5 transcript:ENSRNOT00000020304.6 gene_biotype:protein_coding transcript_biotype:protein_coding gene_symbol:Ap2a1 description:adaptor related protein complex 2 subunit alpha 1 [Source:RGD Symbol;Acc:1306254]	41	24	38	97	977	107.6	7.06	1.01863	0.994093	0.983243	0.963938	1.01361	1.00097	1.01712	0.994565	1.0273	Quantified
ENSRNOP00000061523	myosin Ib	Myo1b	pep chromosome:Rnor_6.0:9:54558202:54766054:1 gene:ENSRNOG00000048152.2 transcript:ENSRNOT00000068433.3 gene_biotype:protein_coding transcript_biotype:protein_coding gene_symbol:Myo1b description:myosin Ib [Source:RGD Symbol;Acc:70994]	34	40	40	111	1136	131.8	9.36	1.04902	0.982678	0.957872	0.924613	0.959807	1.02102	1.01057	1.00349	1.10599	Quantified
ENSRNOP00000071154	selenium-binding protein 1	LOC103689947	pep chromosome:Rnor_6.0:2:196105569:196113149:-1 gene:ENSRNOG00000053812.1 transcript:ENSRNOT00000088465.1 gene_biotype:protein_coding transcript_biotype:protein_coding gene_symbol:LOC103689947 description:selenium-binding protein 1 [Source:RGD Symbol;Acc:9292945]	65	25	25	86	496	55.1	6.86	1.01525	1.05571	0.963598	1.04355	1.01455	0.94626	0.993514	1.00109	0.979268	Quantified
ENSRNOP00000024712	nucleolin	Ncl	pep chromosome:Rnor_6.0:9:93368932:93377643:-1 gene:ENSRNOG00000018273.7 transcript:ENSRNOT00000024712.5 gene_biotype:protein_coding transcript_biotype:protein_coding gene_symbol:Ncl description:nucleolin [Source:RGD Symbol;Acc:3153]	44	39	39	160	714	77.2	4.73	1.02366	0.980802	1.01019	1.01875	0.983406	0.970818	0.997965	0.9786	1.04914	Quantified
ENSRNOP00000029234	chaperonin containing TCP1 subunit 2	Cct2	pep chromosome:Rnor_6.0:7:60109974:60122805:-1 gene:ENSRNOG00000021317.5 transcript:ENSRNOT00000037946.5 gene_biotype:protein_coding transcript_biotype:protein_coding gene_symbol:Cct2 description:chaperonin containing TCP1 subunit 2 [Source:RGD Symbol;Acc:1359143]	63	29	29	101	535	57.4	6.46	1.00212	0.96799	1.01191	1.02883	0.969506	0.982675	1.00441	1.02083	1.0261	Quantified
ENSRNOP00000008321	laminin subunit beta 1	Lamb1	pep chromosome:Rnor_6.0:6:50528823:50596079:1 gene:ENSRNOG00000005678.7 transcript:ENSRNOT00000008321.7 gene_biotype:protein_coding transcript_biotype:protein_coding gene_symbol:Lamb1 description:laminin subunit beta 1 [Source:RGD Symbol;Acc:1306311]	22	42	42	101	1786	197.3	4.97	0.999159	1.02438	0.940986	0.988608	1.07921	0.945612	1.03445	1.02903	0.97016	Quantified
ENSRNOP00000056859	complement factor H	Cfh	pep chromosome:Rnor_6.0:13:56979169:57080622:-1 gene:ENSRNOG00000030715.6 transcript:ENSRNOT00000060111.4 gene_biotype:protein_coding transcript_biotype:protein_coding gene_symbol:Cfh description:complement factor H [Source:RGD Symbol;Acc:620428]	41	41	42	91	1235	140.1	6.77	0.918246	1.04215	0.945686	1.04675	0.97065	0.986534	0.979697	1.02629	1.1019	Quantified
ENSRNOP00000008337	aconitase 1	Aco1	pep chromosome:Rnor_6.0:5:56425024:56481218:1 gene:ENSRNOG00000005849.7 transcript:ENSRNOT00000008337.4 gene_biotype:protein_coding transcript_biotype:protein_coding gene_symbol:Aco1 description:aconitase 1 [Source:RGD Symbol;Acc:2019]	45	37	38	119	889	98.1	7.39	0.990783	1.03536	0.948033	1.05092	1.00902	0.994917	0.998122	1.02308	0.964683	Quantified
ENSRNOP00000028929	myosin 1C	Myo1c	pep chromosome:Rnor_6.0:10:63803309:63819614:1 gene:ENSRNOG00000004072.6 transcript:ENSRNOT00000036666.5 gene_biotype:protein_coding transcript_biotype:protein_coding gene_symbol:Myo1c description:myosin 1C [Source:RGD Symbol;Acc:620443]	41	40	40	93	1044	119.7	9.39	0.97783	1.03749	0.954665	0.978665	1.03819	0.971138	1.01667	1.02647	1.01249	Quantified
ENSRNOP00000065633	tubulin, beta 4A class IVa	Tubb4a	pep chromosome:Rnor_6.0:9:9961021:9968486:1 gene:ENSRNOG00000047505.2 transcript:ENSRNOT00000075767.2 gene_biotype:protein_coding transcript_biotype:protein_coding gene_symbol:Tubb4a description:tubulin, beta 4A class IVa [Source:RGD Symbol;Acc:619730]	57	1	17	275	444	49.6	4.88	1.24216	1.03716	0.779863	0.726198	1.14345	1.03694	0.777314	0.811141	1.46053	Quantified
ENSRNOP00000023224	laminin subunit alpha 1	Lama1	pep chromosome:Rnor_6.0:9:115916907:116042123:1 gene:ENSRNOG00000017237.6 transcript:ENSRNOT00000023226.6 gene_biotype:protein_coding transcript_biotype:protein_coding gene_symbol:Lama1 description:laminin subunit alpha 1 [Source:RGD Symbol;Acc:1307207]	16	47	47	67	3083	338	6.67	0.972728	0.96857	1.01121	1.01951	1.02878	0.931313	1.03819	0.960626	1.08107	Quantified
ENSRNOP00000066002	ribophorin I	Rpn1	pep chromosome:Rnor_6.0:4:119997268:120018679:1 gene:ENSRNOG00000046345.2 transcript:ENSRNOT00000073429.2 gene_biotype:protein_coding transcript_biotype:protein_coding gene_symbol:Rpn1 description:ribophorin I [Source:RGD Symbol;Acc:3594]	58	31	31	104	606	68.4	6.51	1.02735	0.964404	1.00321	1.01025	0.980645	0.993055	1.0079	0.976178	1.05081	Quantified
ENSRNOP00000015956	glutamic-oxaloacetic transaminase 2	Got2	pep chromosome:Rnor_6.0:19:9587653:9613340:1 gene:ENSRNOG00000011782.6 transcript:ENSRNOT00000015956.6 gene_biotype:protein_coding transcript_biotype:protein_coding gene_symbol:Got2 description:glutamic-oxaloacetic transaminase 2 [Source:RGD Symbol;Acc:2722]	58	24	24	121	430	47.3	9	1.00781	0.962239	0.938579	0.911288	1.00561	1.05299	1.02299	1.02697	1.08759	Quantified
ENSRNOP00000024885	talin 2	Tln2	pep chromosome:Rnor_6.0:8:73014137:73194837:-1 gene:ENSRNOG00000018373.8 transcript:ENSRNOT00000024885.7 gene_biotype:protein_coding transcript_biotype:protein_coding gene_symbol:Tln2 description:talin 2 [Source:RGD Symbol;Acc:1565416]	15	20	36	85	2542	271.5	5.55	0.958872	1.00269	0.992423	0.978708	1.07923	1.01142	1.02641	0.993724	0.969839	Quantified
ENSRNOP00000003072	SEC31 homolog A, COPII coat complex component	Sec31a	pep chromosome:Rnor_6.0:14:10854737:10909576:1 gene:ENSRNOG00000002251.8 transcript:ENSRNOT00000003072.5 gene_biotype:protein_coding transcript_biotype:protein_coding gene_symbol:Sec31a description:SEC31 homolog A, COPII coat complex component [Source:RGD Symbol;Acc:620233]	31	41	41	94	1249	135.1	6.93	1.02801	1.03234	0.990649	1.03007	0.985652	0.979497	0.996959	1.00996	0.960219	Quantified
ENSRNOP00000010158	glycogen phosphorylase B	Pygb	pep chromosome:Rnor_6.0:3:146582752:146634535:1 gene:ENSRNOG00000007583.7 transcript:ENSRNOT00000010157.6 gene_biotype:protein_coding transcript_biotype:protein_coding gene_symbol:Pygb description:glycogen phosphorylase B [Source:RGD Symbol;Acc:3460]	37	21	28	97	846	96.7	6.9	0.995214	1.06765	0.99572	1.01974	0.983453	0.952217	1.02718	0.994485	0.976971	Quantified
ENSRNOP00000072696	valyl-tRNA synthetase 1	Vars1	pep chromosome:Rnor_6.0:20:4993690:5008255:1 gene:ENSRNOG00000000867.6 transcript:ENSRNOT00000087861.1 gene_biotype:protein_coding transcript_biotype:protein_coding gene_symbol:Vars1 description:valyl-tRNA synthetase 1 [Source:RGD Symbol;Acc:3950]	28	35	35	100	1264	140.3	7.61	1.02097	0.995457	1.01378	1.0226	0.989281	1.009	0.991612	0.984357	0.986946	Quantified
ENSRNOP00000066611	hexokinase 1	Hk1	pep chromosome:Rnor_6.0:20:31912262:31956649:-1 gene:ENSRNOG00000046891.2 transcript:ENSRNOT00000072429.2 gene_biotype:protein_coding transcript_biotype:protein_coding gene_symbol:Hk1 description:hexokinase 1 [Source:RGD Symbol;Acc:2796]	38	28	32	120	893	99.5	7.14	1.01346	1.01982	0.928357	0.940173	1.02376	0.980395	1.00372	1.02732	1.07719	Quantified
ENSRNOP00000003748	serpin family C member 1	Serpinc1	pep chromosome:Rnor_6.0:13:78805347:78820381:1 gene:ENSRNOG00000002783.8 transcript:ENSRNOT00000003748.7 gene_biotype:protein_coding transcript_biotype:protein_coding gene_symbol:Serpinc1 description:serpin family C member 1 [Source:RGD Symbol;Acc:1307404]	48	22	22	112	465	52.2	6.57	0.950492	1.02773	0.989126	1.01932	0.982055	0.972001	1.00221	1.00562	1.06669	Quantified
ENSRNOP00000024000	aldehyde dehydrogenase 1 family, member A1	Aldh1a1	pep chromosome:Rnor_6.0:1:238222521:238264330:1 gene:ENSRNOG00000017619.7 transcript:ENSRNOT00000024000.6 gene_biotype:protein_coding transcript_biotype:protein_coding gene_symbol:Aldh1a1 description:aldehyde dehydrogenase 1 family, member A1 [Source:RGD Symbol;Acc:2087]	44	13	24	99	521	56.6	7.8	0.849959	0.990969	0.955884	1.07639	0.93408	0.839293	1.08389	1.16496	1.11994	Quantified
ENSRNOP00000023252	phosphofructokinase, platelet	Pfkp	pep chromosome:Rnor_6.0:17:68511064:68559471:-1 gene:ENSRNOG00000017163.7 transcript:ENSRNOT00000023252.7 gene_biotype:protein_coding transcript_biotype:protein_coding gene_symbol:Pfkp description:phosphofructokinase, platelet [Source:RGD Symbol;Acc:61893]	42	24	27	87	749	81.7	7.69	0.99075	1.01327	0.974701	1.0532	0.996256	0.95224	1.01886	1.02075	0.993461	Quantified
ENSRNOP00000064899		AABR07070043.1	pep chromosome:Rnor_6.0:8:45561390:45562574:1 gene:ENSRNOG00000050630.2 transcript:ENSRNOT00000047820.5 gene_biotype:protein_coding transcript_biotype:protein_coding gene_symbol:AABR07070043.1	65	9	16	233	333	35.8	8.25	0.997661	0.981781	1.00578	1.02993	0.983533	1.02705	1.00791	1.01246	0.968926	Quantified
ENSRNOP00000002343	OPA1, mitochondrial dynamin like GTPase	Opa1	pep chromosome:Rnor_6.0:11:74720254:74793803:-1 gene:ENSRNOG00000001717.8 transcript:ENSRNOT00000002343.7 gene_biotype:protein_coding transcript_biotype:protein_coding gene_symbol:Opa1 description:OPA1, mitochondrial dynamin like GTPase [Source:RGD Symbol;Acc:708423]	37	34	34	82	960	111.2	7.53	0.929992	0.952735	0.964648	0.940234	1.03886	1.05995	1.05465	1.02769	1.04758	Quantified
ENSRNOP00000004770	leucine aminopeptidase 3	Lap3	pep chromosome:Rnor_6.0:14:70102814:70121797:-1 gene:ENSRNOG00000003289.8 transcript:ENSRNOT00000004770.5 gene_biotype:protein_coding transcript_biotype:protein_coding gene_symbol:Lap3 description:leucine aminopeptidase 3 [Source:RGD Symbol;Acc:1307985]	56	26	26	83	519	56.1	7.21	1.00292	0.986357	1.00451	1.04598	0.984466	1.01547	0.99239	0.979586	1.00327	Quantified
ENSRNOP00000000737	laminin subunit alpha 4	Lama4	pep chromosome:Rnor_6.0:20:44060731:44209614:1 gene:ENSRNOG00000000599.7 transcript:ENSRNOT00000000737.7 gene_biotype:protein_coding transcript_biotype:protein_coding gene_symbol:Lama4 description:laminin subunit alpha 4 [Source:RGD Symbol;Acc:1560062]	24	44	44	79	1773	196.8	6.33	0.968038	1.04353	0.96833	0.953337	1.10555	0.931955	1.02154	1.00902	1.00986	Quantified
ENSRNOP00000008041	catenin alpha 1	Ctnna1	pep chromosome:Rnor_6.0:18:27923572:28055960:1 gene:ENSRNOG00000005796.7 transcript:ENSRNOT00000008041.7 gene_biotype:protein_coding transcript_biotype:protein_coding gene_symbol:Ctnna1 description:catenin alpha 1 [Source:RGD Symbol;Acc:1359485]	45	30	39	72	908	100.2	6.23	0.982925	0.983359	1.03448	1.00062	0.992635	0.997818	1.00233	1.02243	0.997577	Quantified
ENSRNOP00000033290	aminopeptidase puromycin sensitive	Npepps	pep chromosome:Rnor_6.0:10:85140370:85222861:-1 gene:ENSRNOG00000023095.5 transcript:ENSRNOT00000031045.5 gene_biotype:protein_coding transcript_biotype:protein_coding gene_symbol:Npepps description:aminopeptidase puromycin sensitive [Source:RGD Symbol;Acc:619962]	43	35	35	89	920	103.3	5.77	1	1.0051	0.968344	1.00432	0.976573	1.00886	1.04193	0.991788	1.01764	Quantified
ENSRNOP00000009813	fibrinogen beta chain	Fgb	pep chromosome:Rnor_6.0:2:182028113:182035032:-1 gene:ENSRNOG00000007092.7 transcript:ENSRNOT00000009813.3 gene_biotype:protein_coding transcript_biotype:protein_coding gene_symbol:Fgb description:fibrinogen beta chain [Source:RGD Symbol;Acc:2604]	53	26	26	132	479	54.2	7.78	0.963395	0.993004	0.961649	1.1741	1.03188	1.03217	0.962893	0.970645	0.926891	Quantified
ENSRNOP00000067749	heat shock 70 kDa protein 1A	LOC108348108	pep chromosome:Rnor_6.0:20:2699715:2701815:-1 gene:ENSRNOG00000045654.2 transcript:ENSRNOT00000061950.4 gene_biotype:protein_coding transcript_biotype:protein_coding gene_symbol:LOC108348108 description:heat shock 70 kDa protein 1A [Source:RGD Symbol;Acc:11425585]	51	20	27	107	641	70.1	5.82	0.982326	1.00909	0.896202	1.0766	0.942045	1.1881	1.01236	0.985818	0.928941	Quantified
ENSRNOP00000025939	glutathione S-transferase, mu 7	Gstm7	pep chromosome:Rnor_6.0:2:210778388:210782746:-1 gene:ENSRNOG00000018937.4 transcript:ENSRNOT00000025939.4 gene_biotype:protein_coding transcript_biotype:protein_coding gene_symbol:Gstm7 description:glutathione S-transferase, mu 7 [Source:RGD Symbol;Acc:621287]	84	13	22	167	218	25.7	7.39	1.01498	1.06026	1.01435	1.04793	1.01584	0.887041	0.935322	1.01367	1.0224	Quantified
ENSRNOP00000021030	chaperonin containing TCP1 subunit 7	Cct7	pep chromosome:Rnor_6.0:4:117235023:117252265:1 gene:ENSRNOG00000015630.5 transcript:ENSRNOT00000021030.5 gene_biotype:protein_coding transcript_biotype:protein_coding gene_symbol:Cct7 description:chaperonin containing TCP1 subunit 7 [Source:RGD Symbol;Acc:1306422]	56	29	29	110	544	59.6	8	1.03676	1.00535	1.02842	1.02316	0.96353	0.969589	1.00184	0.974717	1.00938	Quantified
ENSRNOP00000041531	staphylococcal nuclease and tudor domain containing 1	Snd1	pep chromosome:Rnor_6.0:4:55772377:56171668:1 gene:ENSRNOG00000031173.6 transcript:ENSRNOT00000047698.5 gene_biotype:protein_coding transcript_biotype:protein_coding gene_symbol:Snd1 description:staphylococcal nuclease and tudor domain containing 1 [Source:RGD Symbol;Acc:631340]	43	36	36	87	909	101.9	7.18	1.05845	0.980733	0.996468	0.992096	0.984307	1.03126	0.975324	0.993417	1.00239	Quantified
ENSRNOP00000029515	glucose-6-phosphate isomerase	Gpi	pep chromosome:Rnor_6.0:1:90063411:90091287:-1 gene:ENSRNOG00000023150.5 transcript:ENSRNOT00000032613.4 gene_biotype:protein_coding transcript_biotype:protein_coding gene_symbol:Gpi description:glucose-6-phosphate isomerase [Source:RGD Symbol;Acc:2727]	47	25	25	110	558	62.8	7.77	1.00175	1.02938	1.00099	1.04436	0.998764	0.991208	0.990038	1.0026	0.954841	Quantified
ENSRNOP00000075032	glutamate dehydrogenase 1	Glud1	pep chromosome:Rnor_6.0:16:10662021:10695557:1 gene:ENSRNOG00000057367.1 transcript:ENSRNOT00000083446.1 gene_biotype:protein_coding transcript_biotype:protein_coding gene_symbol:Glud1 description:glutamate dehydrogenase 1 [Source:RGD Symbol;Acc:2708]	51	27	27	90	558	61.4	8	0.999237	1.01553	0.949424	0.948377	1.00719	0.994639	1.04085	1.00014	1.05858	Quantified
ENSRNOP00000018336	succinate dehydrogenase complex flavoprotein subunit A	Sdha	pep chromosome:Rnor_6.0:1:31545631:31570601:1 gene:ENSRNOG00000013331.5 transcript:ENSRNOT00000018336.4 gene_biotype:protein_coding transcript_biotype:protein_coding gene_symbol:Sdha description:succinate dehydrogenase complex flavoprotein subunit A [Source:RGD Symbol;Acc:621557]	42	23	23	72	656	71.6	7.17	1.01278	0.970485	0.95933	0.973096	0.99933	0.978445	1.03544	0.997708	1.08711	Quantified
ENSRNOP00000072324	tight junction protein 1	Tjp1	pep chromosome:Rnor_6.0:1:126147386:126227469:-1 gene:ENSRNOG00000011077.7 transcript:ENSRNOT00000087332.1 gene_biotype:protein_coding transcript_biotype:protein_coding gene_symbol:Tjp1 description:tight junction protein 1 [Source:RGD Symbol;Acc:1306305]	25	2	39	61	1765	197	6.6	1.02368	0.999538	1.00669	0.970933	0.986496	0.992899	1.01673	0.994505	1.02179	Quantified
ENSRNOP00000022983	serpin family H member 1	Serpinh1	pep chromosome:Rnor_6.0:1:164301010:164308317:-1 gene:ENSRNOG00000016831.6 transcript:ENSRNOT00000022983.6 gene_biotype:protein_coding transcript_biotype:protein_coding gene_symbol:Serpinh1 description:serpin family H member 1 [Source:RGD Symbol;Acc:69302]	47	18	18	117	417	46.5	8.82	1.14111	1.00863	1.01178	1.05973	0.927933	1.06554	0.936436	0.929807	0.933547	Quantified
ENSRNOP00000046194	poly (ADP-ribose) polymerase family, member 14	Parp14	pep chromosome:Rnor_6.0:11:68105369:68137535:1 gene:ENSRNOG00000023334.6 transcript:ENSRNOT00000046888.5 gene_biotype:protein_coding transcript_biotype:protein_coding gene_symbol:Parp14 description:poly (ADP-ribose) polymerase family, member 14 [Source:RGD Symbol;Acc:1310490]	23	42	42	80	1787	199.4	6.89	1.1202	0.961667	0.992984	0.96874	0.916598	1.12855	0.962409	0.96205	1.00366	Quantified
ENSRNOP00000062274	myosin light chain kinase	Mylk	pep chromosome:Rnor_6.0:11:69013060:69223158:-1 gene:ENSRNOG00000002215.7 transcript:ENSRNOT00000067060.2 gene_biotype:protein_coding transcript_biotype:protein_coding gene_symbol:Mylk description:myosin light chain kinase [Source:RGD Symbol;Acc:1310915]	16	32	32	91	1961	214.8	6.02	0.964311	1.1422	0.996982	1.03266	1.04636	0.920868	1.039	0.961887	0.906214	Quantified
ENSRNOP00000008504	heat shock protein family A (Hsp70) member 2	Hspa2	pep chromosome:Rnor_6.0:6:99433572:99436284:1 gene:ENSRNOG00000006472.5 transcript:ENSRNOT00000008504.5 gene_biotype:protein_coding transcript_biotype:protein_coding gene_symbol:Hspa2 description:heat shock protein family A (Hsp70) member 2 [Source:RGD Symbol;Acc:620664]	48	20	32	164	633	69.6	5.67	0.997358	0.969527	1.02044	0.988295	0.98471	1.03912	1.02277	0.983415	1.0091	Quantified
ENSRNOP00000001961	cytochrome p450 oxidoreductase	Por	pep chromosome:Rnor_6.0:12:23998411:24046814:-1 gene:ENSRNOG00000001442.3 transcript:ENSRNOT00000001961.3 gene_biotype:protein_coding transcript_biotype:protein_coding gene_symbol:Por description:cytochrome p450 oxidoreductase [Source:RGD Symbol;Acc:68335]	46	33	33	112	678	76.9	5.48	1.01274	0.9237	1.0278	0.979383	0.990699	1.07722	1.01051	1.00614	0.98732	Quantified
ENSRNOP00000001958	malate dehydrogenase 2	Mdh2	pep chromosome:Rnor_6.0:12:23941448:23954431:-1 gene:ENSRNOG00000001440.4 transcript:ENSRNOT00000001958.4 gene_biotype:protein_coding transcript_biotype:protein_coding gene_symbol:Mdh2 description:malate dehydrogenase 2 [Source:RGD Symbol;Acc:619719]	68	20	20	223	338	35.7	8.68	0.981752	0.984513	0.95711	0.935804	1.02988	1.02462	1.02121	1.03006	1.05016	Quantified
ENSRNOP00000065690	phosphoglycerate mutase 1	Pgam1	pep chromosome:Rnor_6.0:1:261158261:261165808:1 gene:ENSRNOG00000050585.2 transcript:ENSRNOT00000071965.2 gene_biotype:protein_coding transcript_biotype:protein_coding gene_symbol:Pgam1 description:phosphoglycerate mutase 1 [Source:RGD Symbol;Acc:3312]	63	11	15	90	254	28.8	7.18	0.970635	1.01031	0.928435	0.980243	1.03062	1.02948	1.04582	0.982278	1.03742	Quantified
ENSRNOP00000009100	DEAD-box helicase 1	Ddx1	pep chromosome:Rnor_6.0:6:38422888:38453797:-1 gene:ENSRNOG00000006652.6 transcript:ENSRNOT00000009100.6 gene_biotype:protein_coding transcript_biotype:protein_coding gene_symbol:Ddx1 description:DEAD-box helicase 1 [Source:RGD Symbol;Acc:619903]	51	33	33	75	740	82.4	7.23	0.994016	1.00121	0.974393	1.0023	0.984265	0.985863	1.00719	1.0179	1.04763	Quantified
ENSRNOP00000041663	DEAD-box helicase 5	Ddx5	pep chromosome:Rnor_6.0:10:94980928:94988461:-1 gene:ENSRNOG00000030680.4 transcript:ENSRNOT00000048490.2 gene_biotype:protein_coding transcript_biotype:protein_coding gene_symbol:Ddx5 description:DEAD-box helicase 5 [Source:RGD Symbol;Acc:619906]	48	23	32	137	615	69.2	8.92	1.03376	1.02093	0.996556	1.00864	0.987159	0.947437	1.00298	0.991853	1.02305	Quantified
ENSRNOP00000025570	golgi glycoprotein 1	Glg1	pep chromosome:Rnor_6.0:19:42983869:43090841:1 gene:ENSRNOG00000018668.3 transcript:ENSRNOT00000025570.3 gene_biotype:protein_coding transcript_biotype:protein_coding gene_symbol:Glg1 description:golgi glycoprotein 1 [Source:RGD Symbol;Acc:69345]	30	37	37	82	1171	133.5	6.9	1.02424	0.964328	0.986283	1.01978	0.985534	1.02262	0.994727	0.965832	1.05167	Quantified
ENSRNOP00000039172	hypoxia up-regulated 1	Hyou1	pep chromosome:Rnor_6.0:8:48699769:48711910:1 gene:ENSRNOG00000010944.6 transcript:ENSRNOT00000044613.4 gene_biotype:protein_coding transcript_biotype:protein_coding gene_symbol:Hyou1 description:hypoxia up-regulated 1 [Source:RGD Symbol;Acc:621146]	34	31	31	87	998	111.2	5.19	1.07415	0.976696	1.01183	1.05218	0.939056	1.06256	0.981763	0.931599	0.985365	Quantified
ENSRNOP00000070912	heterogeneous nuclear ribonucleoprotein U	Hnrnpu	pep chromosome:Rnor_6.0:13:96225912:96238572:-1 gene:ENSRNOG00000033790.4 transcript:ENSRNOT00000078061.1 gene_biotype:protein_coding transcript_biotype:protein_coding gene_symbol:Hnrnpu description:heterogeneous nuclear ribonucleoprotein U [Source:RGD Symbol;Acc:620372]	30	27	27	125	803	87.9	6.09	1.01915	1.00388	0.997441	1.00685	0.979736	0.91824	1.01814	1.00304	1.0656	Quantified
ENSRNOP00000071263	lymphocyte cytosolic protein 1	Lcp1	pep chromosome:Rnor_6.0:15:57241968:57277811:1 gene:ENSRNOG00000010319.6 transcript:ENSRNOT00000082191.1 gene_biotype:protein_coding transcript_biotype:protein_coding gene_symbol:Lcp1 description:lymphocyte cytosolic protein 1 [Source:RGD Symbol;Acc:1308288]	52	26	30	71	645	71.9	5.34	1.27856	1.20913	1.01974	0.926129	0.858555	0.99407	0.930966	0.933363	0.858937	Quantified
ENSRNOP00000023452	tubulin, beta 3 class III	Tubb3	pep chromosome:Rnor_6.0:19:56220755:56229813:1 gene:ENSRNOG00000017209.6 transcript:ENSRNOT00000023452.6 gene_biotype:protein_coding transcript_biotype:protein_coding gene_symbol:Tubb3 description:tubulin, beta 3 class III [Source:RGD Symbol;Acc:628595]	48	3	17	251	450	50.4	4.93	1.07692	1.04472	1.00586	1.07203	1.03775	0.987654	0.946312	0.94816	0.892356	Quantified
ENSRNOP00000028188	damage-specific DNA binding protein 1	Ddb1	pep chromosome:Rnor_6.0:1:226657561:226683347:1 gene:ENSRNOG00000020715.7 transcript:ENSRNOT00000028188.7 gene_biotype:protein_coding transcript_biotype:protein_coding gene_symbol:Ddb1 description:damage-specific DNA binding protein 1 [Source:RGD Symbol;Acc:621889]	33	36	36	91	1140	126.9	5.26	0.993816	1.01885	1.01435	1.02054	1.00037	0.975257	0.996425	0.971485	1.02236	Quantified
ENSRNOP00000023860	kinesin family member 5B	Kif5b	pep chromosome:Rnor_6.0:17:54181419:54212096:1 gene:ENSRNOG00000017466.6 transcript:ENSRNOT00000023861.6 gene_biotype:protein_coding transcript_biotype:protein_coding gene_symbol:Kif5b description:kinesin family member 5B [Source:RGD Symbol;Acc:621559]	39	30	40	69	963	109.5	6.44	1.01192	1.00835	0.990139	1.00487	1.01352	0.979884	1.00288	1.01749	0.984203	Quantified
ENSRNOP00000074226	acyl-CoA synthetase bubblegum family member 1	Acsbg1	pep chromosome:Rnor_6.0:8:59184397:59226597:-1 gene:ENSRNOG00000011381.5 transcript:ENSRNOT00000088208.1 gene_biotype:protein_coding transcript_biotype:protein_coding gene_symbol:Acsbg1 description:acyl-CoA synthetase bubblegum family member 1 [Source:RGD Symbol;Acc:708557]	36	23	23	82	730	81.5	6.93	0.898221	0.992561	1.01267	1.0145	1.06235	0.88446	1.02435	1.04453	1.07873	Quantified
ENSRNOP00000020325	aldehyde dehydrogenase 7 family, member A1	Aldh7a1	pep chromosome:Rnor_6.0:18:51619007:51651267:-1 gene:ENSRNOG00000014645.7 transcript:ENSRNOT00000020325.7 gene_biotype:protein_coding transcript_biotype:protein_coding gene_symbol:Aldh7a1 description:aldehyde dehydrogenase 7 family, member A1 [Source:RGD Symbol;Acc:1308614]	51	23	23	61	539	58.7	7.87	0.936422	0.941016	0.989791	0.994913	1.03915	0.957633	1.05788	1.01584	1.08086	Quantified
ENSRNOP00000035840	radixin	Rdx	pep chromosome:Rnor_6.0:8:56585396:56610612:1 gene:ENSRNOG00000012237.6 transcript:ENSRNOT00000034924.5 gene_biotype:protein_coding transcript_biotype:protein_coding gene_symbol:Rdx description:radixin [Source:RGD Symbol;Acc:1359472]	44	25	33	93	583	68.4	5.74	1.04832	1.00783	1.01109	1.0083	0.973209	0.992497	1.00794	0.993042	0.970687	Quantified
ENSRNOP00000013262	electron transfer flavoprotein dehydrogenase	Etfdh	pep chromosome:Rnor_6.0:2:178367549:178389608:-1 gene:ENSRNOG00000009538.6 transcript:ENSRNOT00000013262.6 gene_biotype:protein_coding transcript_biotype:protein_coding gene_symbol:Etfdh description:electron transfer flavoprotein dehydrogenase [Source:RGD Symbol;Acc:735052]	47	26	26	91	616	68.1	7.56	0.907384	0.932804	0.963139	0.94093	1.05031	1.04629	1.0188	1.01249	1.14523	Quantified
ENSRNOP00000020647	triosephosphate isomerase 1	Tpi1	pep chromosome:Rnor_6.0:4:157328379:157331905:-1 gene:ENSRNOG00000015290.6 transcript:ENSRNOT00000020647.6 gene_biotype:protein_coding transcript_biotype:protein_coding gene_symbol:Tpi1 description:triosephosphate isomerase 1 [Source:RGD Symbol;Acc:3896]	87	17	17	108	249	26.8	7.24	0.990305	1.02607	0.980319	1.04573	1.04541	0.996514	0.993952	0.995181	0.940189	Quantified
ENSRNOP00000026122	3-hydroxy-3-methylglutaryl-CoA synthase 2	Hmgcs2	pep chromosome:Rnor_6.0:2:200452624:200479423:1 gene:ENSRNOG00000019120.7 transcript:ENSRNOT00000026121.7 gene_biotype:protein_coding transcript_biotype:protein_coding gene_symbol:Hmgcs2 description:3-hydroxy-3-methylglutaryl-CoA synthase 2 [Source:RGD Symbol;Acc:2804]	38	17	18	209	508	56.9	8.68	0.840061	1.03315	0.944718	1.01609	1.02627	0.872236	0.955594	1.01446	1.31445	Quantified
ENSRNOP00000024012	WD repeat domain 1	Wdr1	pep chromosome:Rnor_6.0:14:76989919:77023726:1 gene:ENSRNOG00000028498.5 transcript:ENSRNOT00000024012.6 gene_biotype:protein_coding transcript_biotype:protein_coding gene_symbol:Wdr1 description:WD repeat domain 1 [Source:RGD Symbol;Acc:1305789]	47	26	26	93	606	66.1	6.62	1.03659	0.994419	0.9639	1.00354	0.942498	1.09295	0.978966	1.01728	0.987536	Quantified
ENSRNOP00000014988	tight junction protein 1	Tjp1	pep chromosome:Rnor_6.0:1:126146489:126211439:-1 gene:ENSRNOG00000011077.7 transcript:ENSRNOT00000014988.7 gene_biotype:protein_coding transcript_biotype:protein_coding gene_symbol:Tjp1 description:tight junction protein 1 [Source:RGD Symbol;Acc:1306305]	23	1	38	60	1733	193.9	6.58	0.959099	0.980024	0.998434	0.992685	0.986272	1.02346	0.999766	1.1102	0.966376	Quantified
ENSRNOP00000004091	calreticulin	Calr	pep chromosome:Rnor_6.0:19:25956771:25961666:-1 gene:ENSRNOG00000003029.6 transcript:ENSRNOT00000004091.6 gene_biotype:protein_coding transcript_biotype:protein_coding gene_symbol:Calr description:calreticulin [Source:RGD Symbol;Acc:620288]	60	22	23	115	416	48	4.49	1.08784	0.99902	0.931053	0.9759	0.943709	1.04936	1.01287	0.978306	1.03723	Quantified
ENSRNOP00000006361	N-ethylmaleimide sensitive factor, vesicle fusing ATPase	Nsf	pep chromosome:Rnor_6.0:10:91878633:92008082:-1 gene:ENSRNOG00000003905.6 transcript:ENSRNOT00000006361.6 gene_biotype:protein_coding transcript_biotype:protein_coding gene_symbol:Nsf description:N-ethylmaleimide sensitive factor, vesicle fusing ATPase [Source:RGD Symbol;Acc:621594]	43	32	32	70	744	82.6	6.95	0.928583	1.01013	0.941863	0.99193	0.996703	1.01943	1.0303	1.04496	1.05309	Quantified
ENSRNOP00000025203	Tu translation elongation factor, mitochondrial	Tufm	pep chromosome:Rnor_6.0:1:197903582:197907189:1 gene:ENSRNOG00000018604.6 transcript:ENSRNOT00000025203.6 gene_biotype:protein_coding transcript_biotype:protein_coding gene_symbol:Tufm description:Tu translation elongation factor, mitochondrial [Source:RGD Symbol;Acc:1305501]	56	23	23	113	452	49.5	7.56	0.977413	0.988296	0.962558	1.00779	1.03343	0.994382	1.00602	1.02108	1.02369	Quantified
ENSRNOP00000010252	arginyl-tRNA synthetase 1	Rars1	pep chromosome:Rnor_6.0:10:20633632:20658100:-1 gene:ENSRNOG00000007739.6 transcript:ENSRNOT00000010252.6 gene_biotype:protein_coding transcript_biotype:protein_coding gene_symbol:Rars1 description:arginyl-tRNA synthetase 1 [Source:RGD Symbol;Acc:1309215]	47	33	33	73	660	75.8	7.05	1.009	1.03492	1.01505	0.997265	0.9692	0.995727	0.976939	1.02579	0.990621	Quantified
ENSRNOP00000067910	DEAD-box helicase 17	Ddx17	pep chromosome:Rnor_6.0:7:120761826:120780641:-1 gene:ENSRNOG00000051170.2 transcript:ENSRNOT00000076164.2 gene_biotype:protein_coding transcript_biotype:protein_coding gene_symbol:Ddx17 description:DEAD-box helicase 17 [Source:RGD Symbol;Acc:1304945]	43	20	29	97	652	72.6	8.68	1.02365	0.999008	1.0084	0.997497	1.00742	0.961	1.01925	1.01061	0.9852	Quantified
ENSRNOP00000039779	apolipoprotein B	Apob	pep chromosome:Rnor_6.0:6:33176778:33224997:1 gene:ENSRNOG00000005542.8 transcript:ENSRNOT00000046811.4 gene_biotype:protein_coding transcript_biotype:protein_coding gene_symbol:Apob description:apolipoprotein B [Source:RGD Symbol;Acc:2129]	9	45	45	59	4743	535.7	7.42	1.00819	0.781853	0.876285	0.970223	0.947383	1.3051	1.00055	1.02432	1.11179	Quantified
ENSRNOP00000074521	similar to RIKEN cDNA 1300017J02	RGD1310507	pep chromosome:Rnor_6.0:8:111741678:111777677:-1 gene:ENSRNOG00000009434.7 transcript:ENSRNOT00000083855.1 gene_biotype:protein_coding transcript_biotype:protein_coding gene_symbol:RGD1310507 description:similar to RIKEN cDNA 1300017J02 [Source:RGD Symbol;Acc:1310507]	50	29	30	116	700	76.7	6.96	0.99722	1.08449	1.01619	0.998493	0.927548	1.03414	0.948519	1.05283	0.957349	Quantified
ENSRNOP00000004364	structural maintenance of chromosomes 1A	Smc1a	pep chromosome:Rnor_6.0:X:21711019:21755525:1 gene:ENSRNOG00000003139.7 transcript:ENSRNOT00000004364.7 gene_biotype:protein_coding transcript_biotype:protein_coding gene_symbol:Smc1a description:structural maintenance of chromosomes 1A [Source:RGD Symbol;Acc:61991]	31	39	39	64	1232	142.9	7.15	1.02748	0.998678	1.0157	1.00605	0.983978	0.980733	1.00478	0.987586	1.00804	Quantified
ENSRNOP00000027360	major vault protein	Mvp	pep chromosome:Rnor_6.0:1:198420806:198450047:-1 gene:ENSRNOG00000020182.5 transcript:ENSRNOT00000027360.5 gene_biotype:protein_coding transcript_biotype:protein_coding gene_symbol:Mvp description:major vault protein [Source:RGD Symbol;Acc:70932]	39	28	28	69	871	96.8	5.63	1.02923	0.967667	1.03732	0.917541	1.03707	1.03275	1.03505	0.995895	0.959561	Quantified
ENSRNOP00000028743	stress-induced phosphoprotein 1	Stip1	pep chromosome:Rnor_6.0:1:222274133:222293148:-1 gene:ENSRNOG00000021164.7 transcript:ENSRNOT00000028743.7 gene_biotype:protein_coding transcript_biotype:protein_coding gene_symbol:Stip1 description:stress-induced phosphoprotein 1 [Source:RGD Symbol;Acc:621599]	52	32	32	97	543	62.5	6.8	1.05243	1.04541	1.01592	1.03063	0.943966	0.964631	0.974882	0.990822	0.994512	Quantified
ENSRNOP00000001695	collagen type VI alpha 2 chain	Col6a2	pep chromosome:Rnor_6.0:20:12773427:12801180:1 gene:ENSRNOG00000001254.6 transcript:ENSRNOT00000001695.6 gene_biotype:protein_coding transcript_biotype:protein_coding gene_symbol:Col6a2 description:collagen type VI alpha 2 chain [Source:RGD Symbol;Acc:1305585]	25	25	25	113	1027	109.6	6.61	0.859214	1.22544	0.813251	1.02869	1.02906	1.0048	1.05562	1.07084	0.931133	Quantified
ENSRNOP00000011230	catalase	Cat	pep chromosome:Rnor_6.0:3:93379874:93412058:-1 gene:ENSRNOG00000008364.6 transcript:ENSRNOT00000011230.5 gene_biotype:protein_coding transcript_biotype:protein_coding gene_symbol:Cat description:catalase [Source:RGD Symbol;Acc:2279]	51	24	24	84	527	59.7	7.5	0.977416	0.961431	0.973923	1.00254	1.00347	1.03317	1.00153	1.04923	1.01351	Quantified
ENSRNOP00000073727	myoferlin	Myof	pep chromosome:Rnor_6.0:1:256585898:256734730:-1 gene:ENSRNOG00000016117.7 transcript:ENSRNOT00000089456.1 gene_biotype:protein_coding transcript_biotype:protein_coding gene_symbol:Myof description:myoferlin [Source:RGD Symbol;Acc:1564216]	23	43	44	63	2061	234.5	6.09	0.994683	1.02741	0.96461	0.975535	0.993119	1.03368	1.01353	1.01945	0.993394	Quantified
ENSRNOP00000001201	heat shock protein family H (Hsp110) member 1	Hsph1	pep chromosome:Rnor_6.0:12:6322668:6341902:-1 gene:ENSRNOG00000000902.7 transcript:ENSRNOT00000001201.7 gene_biotype:protein_coding transcript_biotype:protein_coding gene_symbol:Hsph1 description:heat shock protein family H (Hsp110) member 1 [Source:RGD Symbol;Acc:1311609]	36	25	26	57	858	96.4	5.55	1.03703	0.928348	1.06226	1.00605	0.927172	1.0513	0.986007	1.04785	0.969552	Quantified
ENSRNOP00000023664	annexin A1	Anxa1	pep chromosome:Rnor_6.0:1:237893966:237910012:-1 gene:ENSRNOG00000017469.6 transcript:ENSRNOT00000023664.6 gene_biotype:protein_coding transcript_biotype:protein_coding gene_symbol:Anxa1 description:annexin A1 [Source:RGD Symbol;Acc:2118]	64	23	23	89	346	38.8	7.34	0.981813	1.13112	1.13026	0.965466	1.01878	0.978356	0.947083	0.947458	0.911012	Quantified
ENSRNOP00000049473		AABR07061950.1	pep chromosome:Rnor_6.0:4:154780302:154855098:-1 gene:ENSRNOG00000042228.4 transcript:ENSRNOT00000041957.4 gene_biotype:protein_coding transcript_biotype:protein_coding gene_symbol:AABR07061950.1	27	7	23	162	872	97.3	7.97	1.00028	1.0497	1.01927	1.01006	0.896419	0.997945	0.978891	1.02433	1.03925	Quantified
ENSRNOP00000074045	tripeptidyl peptidase 2	Tpp2	pep chromosome:Rnor_6.0:9:50581234:50744803:1 gene:ENSRNOG00000011194.6 transcript:ENSRNOT00000078220.1 gene_biotype:protein_coding transcript_biotype:protein_coding gene_symbol:Tpp2 description:tripeptidyl peptidase 2 [Source:RGD Symbol;Acc:621584]	30	35	35	74	1249	138.2	6.38	1.04105	0.959029	0.974305	1.01318	0.963872	1.08541	0.989375	0.987268	1.00327	Quantified
ENSRNOP00000024310	adenosylhomocysteinase	Ahcy	pep chromosome:Rnor_6.0:3:150587833:150603082:-1 gene:ENSRNOG00000017777.3 transcript:ENSRNOT00000024310.3 gene_biotype:protein_coding transcript_biotype:protein_coding gene_symbol:Ahcy description:adenosylhomocysteinase [Source:RGD Symbol;Acc:69260]	62	24	24	123	432	47.5	6.54	0.965965	1.04392	1.01572	1.03109	1.01902	0.963969	1.02011	0.957329	0.995657	Quantified
ENSRNOP00000040698	eukaryotic translation initiation factor 4 gamma, 1	Eif4g1	pep chromosome:Rnor_6.0:11:83908109:83926524:-1 gene:ENSRNOG00000001738.8 transcript:ENSRNOT00000040029.5 gene_biotype:protein_coding transcript_biotype:protein_coding gene_symbol:Eif4g1 description:eukaryotic translation initiation factor 4 gamma, 1 [Source:RGD Symbol;Acc:1306144]	23	1	37	66	1592	175	5.36	0.982375	1.00526	1.05887	1.03297	0.974473	0.991618	0.970553	0.995769	1.00259	Quantified
ENSRNOP00000012775	poly(A) binding protein, cytoplasmic 1	Pabpc1	pep chromosome:Rnor_6.0:7:75409581:75421874:-1 gene:ENSRNOG00000008639.7 transcript:ENSRNOT00000012775.7 gene_biotype:protein_coding transcript_biotype:protein_coding gene_symbol:Pabpc1 description:poly(A) binding protein, cytoplasmic 1 [Source:RGD Symbol;Acc:619838]	41	20	28	108	636	70.7	9.5	1.06592	0.98498	0.991011	0.987172	0.966683	1.02874	0.986087	0.987266	1.01657	Quantified
ENSRNOP00000038428	annexin A2	Anxa2	pep chromosome:Rnor_6.0:8:75687100:75723594:1 gene:ENSRNOG00000010362.7 transcript:ENSRNOT00000038677.5 gene_biotype:protein_coding transcript_biotype:protein_coding gene_symbol:Anxa2 description:annexin A2 [Source:RGD Symbol;Acc:621170]	59	23	23	210	339	38.7	7.69	1.02208	0.987994	0.964502	0.95085	1.01806	1.07366	1.02983	0.989007	0.978941	Quantified
ENSRNOP00000074636	splicing factor proline and glutamine rich	Sfpq	pep chromosome:Rnor_6.0:5:145079803:145088498:1 gene:ENSRNOG00000058461.1 transcript:ENSRNOT00000084202.1 gene_biotype:protein_coding transcript_biotype:protein_coding gene_symbol:Sfpq description:splicing factor proline and glutamine rich [Source:RGD Symbol;Acc:727923]	34	24	25	80	696	75	9.39	0.998189	0.9907	1.01945	1.0105	1.00714	0.989661	1.00768	0.963939	1.02611	Quantified
ENSRNOP00000060662	ribosomal protein L3	Rpl3	pep chromosome:Rnor_6.0:7:121297355:121302740:-1 gene:ENSRNOG00000016896.8 transcript:ENSRNOT00000067032.3 gene_biotype:protein_coding transcript_biotype:protein_coding gene_symbol:Rpl3 description:ribosomal protein L3 [Source:RGD Symbol;Acc:735105]	54	24	24	104	403	46.1	10.21	1.04729	0.986661	0.991618	0.981011	0.93613	0.9998	1.00671	1.01323	1.05207	Quantified
ENSRNOP00000049629	eukaryotic translation initiation factor 4 gamma, 1	Eif4g1	pep chromosome:Rnor_6.0:11:83908109:83926524:-1 gene:ENSRNOG00000001738.8 transcript:ENSRNOT00000041777.6 gene_biotype:protein_coding transcript_biotype:protein_coding gene_symbol:Eif4g1 description:eukaryotic translation initiation factor 4 gamma, 1 [Source:RGD Symbol;Acc:1306144]	23	1	37	66	1598	175.6	5.38	1.03239	0.986551	1.00583	0.997458	1.00105	1.06702	0.961953	1.00085	0.962459	Quantified
ENSRNOP00000023739	aldo-keto reductase family 1, member C3	Akr1c3	pep chromosome:Rnor_6.0:17:69761118:69778021:1 gene:ENSRNOG00000017531.7 transcript:ENSRNOT00000023739.5 gene_biotype:protein_coding transcript_biotype:protein_coding gene_symbol:Akr1c3 description:aldo-keto reductase family 1, member C3 [Source:RGD Symbol;Acc:708428]	63	11	17	214	323	37.3	6.3	0.964396	0.791981	0.877632	0.68907	1.03621	1.43701	1.05521	1.11323	1.06179	Quantified
ENSRNOP00000008374	methylenetetrahydrofolate dehydrogenase, cyclohydrolase and formyltetrahydrofolate synthetase 1	Mthfd1	pep chromosome:Rnor_6.0:6:99282850:99350340:1 gene:ENSRNOG00000005602.5 transcript:ENSRNOT00000008374.3 gene_biotype:protein_coding transcript_biotype:protein_coding gene_symbol:Mthfd1 description:methylenetetrahydrofolate dehydrogenase, cyclohydrolase and formyltetrahydrofolate synthetase 1 [Source:RGD Symbol;Acc:708531]	35	29	30	68	935	100.9	7.42	1.0272	1.03458	1.01305	1.02246	0.97295	0.950407	0.981645	1.01007	1.00059	Quantified
ENSRNOP00000008966	TNF receptor-associated protein 1	Trap1	pep chromosome:Rnor_6.0:10:11724032:11757681:1 gene:ENSRNOG00000005418.4 transcript:ENSRNOT00000008966.4 gene_biotype:protein_coding transcript_biotype:protein_coding gene_symbol:Trap1 description:TNF receptor-associated protein 1 [Source:RGD Symbol;Acc:1359733]	49	30	30	64	706	80.4	7.03	0.965695	0.984615	1.00808	1.00092	1.02424	1.02062	0.988474	1.0411	0.981482	Quantified
ENSRNOP00000012114	programmed cell death 6 interacting protein	Pdcd6ip	pep chromosome:Rnor_6.0:8:121916185:121973125:-1 gene:ENSRNOG00000008981.7 transcript:ENSRNOT00000012114.7 gene_biotype:protein_coding transcript_biotype:protein_coding gene_symbol:Pdcd6ip description:programmed cell death 6 interacting protein [Source:RGD Symbol;Acc:68357]	37	33	33	69	868	95.8	6.52	1.0066	1.01362	0.971995	0.99731	1.01829	0.993995	1.03085	1.02088	0.959749	Quantified
ENSRNOP00000040859	calnexin	Canx	pep chromosome:Rnor_6.0:10:35800942:35833861:-1 gene:ENSRNOG00000003343.6 transcript:ENSRNOT00000049942.4 gene_biotype:protein_coding transcript_biotype:protein_coding gene_symbol:Canx description:calnexin [Source:RGD Symbol;Acc:2266]	38	28	28	100	591	67.2	4.63	1.04107	0.979979	1.02201	1.00193	0.991213	1.00108	1.02091	0.957693	0.99669	Quantified
ENSRNOP00000075297	glucose-6-phosphate dehydrogenase	G6pd	pep chromosome:Rnor_6.0:X:156274800:156293926:1 gene:ENSRNOG00000056728.1 transcript:ENSRNOT00000080887.1 gene_biotype:protein_coding transcript_biotype:protein_coding gene_symbol:G6pd description:glucose-6-phosphate dehydrogenase [Source:RGD Symbol;Acc:2645]	64	29	29	140	515	59.3	6.38	0.943578	0.955767	0.945606	0.915915	1.03897	1.06434	1.04185	1.067	1.04372	Quantified
ENSRNOP00000012879	aldo-keto reductase family 1 member B	Akr1b1	pep chromosome:Rnor_6.0:4:61706864:61720956:-1 gene:ENSRNOG00000009513.3 transcript:ENSRNOT00000012879.3 gene_biotype:protein_coding transcript_biotype:protein_coding gene_symbol:Akr1b1 description:aldo-keto reductase family 1 member B [Source:RGD Symbol;Acc:2092]	66	17	19	156	316	35.8	6.71	1.00228	1.00354	0.998108	1.0367	0.968832	0.87898	1.02931	0.982921	1.11099	Quantified
ENSRNOP00000063941	RAN binding protein 2	Ranbp2	pep chromosome:Rnor_6.0:20:28027054:28076664:1 gene:ENSRNOG00000000796.8 transcript:ENSRNOT00000071386.3 gene_biotype:protein_coding transcript_biotype:protein_coding gene_symbol:Ranbp2 description:RAN binding protein 2 [Source:RGD Symbol;Acc:1560047]	12	42	42	62	3088	344.2	6.02	0.994675	1.01205	1.00665	1.01525	1.01859	0.968959	0.997303	0.993305	1.00632	Quantified
ENSRNOP00000065206	apolipoprotein A1	Apoa1	pep chromosome:Rnor_6.0:8:50525091:50526875:1 gene:ENSRNOG00000045679.2 transcript:ENSRNOT00000074357.2 gene_biotype:protein_coding transcript_biotype:protein_coding gene_symbol:Apoa1 description:apolipoprotein A1 [Source:RGD Symbol;Acc:2130]	61	16	16	154	259	30	5.74	1.11677	1.0243	0.99267	0.945093	0.908304	1.10707	0.885314	0.981928	1.05651	Quantified
ENSRNOP00000068758	receptor for activated C kinase 1	Rack1	pep chromosome:Rnor_6.0:12:35905358:35906382:-1 gene:ENSRNOG00000049070.2 transcript:ENSRNOT00000072179.2 gene_biotype:protein_coding transcript_biotype:protein_coding gene_symbol:Rack1 description:receptor for activated C kinase 1 [Source:RGD Symbol;Acc:69229]	78	19	19	118	317	35.1	7.69	1.03873	0.956565	0.981072	1.00841	0.948234	1.00823	0.995854	1.01041	1.06783	Quantified
ENSRNOP00000004232	poly (ADP-ribose) polymerase 1	Parp1	pep chromosome:Rnor_6.0:13:98857177:98889716:1 gene:ENSRNOG00000003084.5 transcript:ENSRNOT00000004232.5 gene_biotype:protein_coding transcript_biotype:protein_coding gene_symbol:Parp1 description:poly (ADP-ribose) polymerase 1 [Source:RGD Symbol;Acc:2053]	36	34	34	61	1014	112.6	8.97	1.01792	1.00808	1.0274	1.02172	0.998674	0.971652	0.994737	0.971145	1.00133	Quantified
ENSRNOP00000074025	DEAD-box helicase 3, X-linked	Ddx3x	pep chromosome:Rnor_6.0:X:10402725:10413995:-1 gene:ENSRNOG00000023383.6 transcript:ENSRNOT00000091448.1 gene_biotype:protein_coding transcript_biotype:protein_coding gene_symbol:Ddx3x description:DEAD-box helicase 3, X-linked [Source:RGD Symbol;Acc:1564771]	44	28	29	96	662	73.1	7.18	0.993732	1.0063	0.990122	0.97346	1.01075	0.997837	1.01179	1.02263	1.00738	Quantified
ENSRNOP00000049419	eukaryotic translation initiation factor 4A1	Eif4a1	pep chromosome:Rnor_6.0:10:56271257:56276764:-1 gene:ENSRNOG00000030628.2 transcript:ENSRNOT00000049048.1 gene_biotype:protein_coding transcript_biotype:protein_coding gene_symbol:Eif4a1 description:eukaryotic translation initiation factor 4A1 [Source:RGD Symbol;Acc:735141]	50	10	20	106	406	46.1	5.48	1.04594	0.967629	1.01869	1.00691	0.968973	1.03415	0.994639	0.983044	0.994406	Quantified
ENSRNOP00000021073	tropomyosin 4	Tpm4	pep chromosome:Rnor_6.0:16:19385736:19399903:-1 gene:ENSRNOG00000015496.6 transcript:ENSRNOT00000021073.5 gene_biotype:protein_coding transcript_biotype:protein_coding gene_symbol:Tpm4 description:tropomyosin 4 [Source:RGD Symbol;Acc:3899]	75	12	26	135	248	28.5	4.69	1.04073	1.06116	0.92844	1.00534	1.01301	1.01936	1.05157	0.973992	0.919427	Quantified
ENSRNOP00000022336	lamin B2	Lmnb2	pep chromosome:Rnor_6.0:7:11660934:11675472:1 gene:ENSRNOG00000025742.7 transcript:ENSRNOT00000022336.8 gene_biotype:protein_coding transcript_biotype:protein_coding gene_symbol:Lmnb2 description:lamin B2 [Source:RGD Symbol;Acc:1563803]	55	29	32	64	616	68.8	5.26	0.825506	0.988918	1.03526	0.989109	1.24571	1.09293	0.773875	1.02323	1.0452	Quantified
ENSRNOP00000002358	proteasome 26S subunit, non-ATPase 2	Psmd2	pep chromosome:Rnor_6.0:11:83934087:83944763:-1 gene:ENSRNOG00000001719.6 transcript:ENSRNOT00000002358.6 gene_biotype:protein_coding transcript_biotype:protein_coding gene_symbol:Psmd2 description:proteasome 26S subunit, non-ATPase 2 [Source:RGD Symbol;Acc:1305752]	36	31	31	88	908	100.1	5.2	1.01501	1.01046	0.997019	1.0038	0.965386	1.01381	0.983114	1.0331	0.993536	Quantified
ENSRNOP00000019552	annexin A5	Anxa5	pep chromosome:Rnor_6.0:2:123162461:123193130:-1 gene:ENSRNOG00000014453.6 transcript:ENSRNOT00000019554.6 gene_biotype:protein_coding transcript_biotype:protein_coding gene_symbol:Anxa5 description:annexin A5 [Source:RGD Symbol;Acc:2120]	65	20	21	210	319	35.8	5.05	0.945399	0.948523	0.888434	0.872058	1.0405	1.04094	1.0181	1.11126	1.15278	Quantified
ENSRNOP00000073496	Rho-associated coiled-coil containing protein kinase 2	Rock2	pep chromosome:Rnor_6.0:6:42180894:42289908:1 gene:ENSRNOG00000004496.7 transcript:ENSRNOT00000090816.1 gene_biotype:protein_coding transcript_biotype:protein_coding gene_symbol:Rock2 description:Rho-associated coiled-coil containing protein kinase 2 [Source:RGD Symbol;Acc:3590]	26	28	35	48	1388	160.5	5.99	1.00674	1.02061	0.993709	0.988615	1.01532	1.00423	1.00859	1.00214	0.973613	Quantified
ENSRNOP00000058049	erythrocyte membrane protein band 4.1-like 2	Epb41l2	pep chromosome:Rnor_6.0:1:20893995:20962526:-1 gene:ENSRNOG00000012346.8 transcript:ENSRNOT00000061332.5 gene_biotype:protein_coding transcript_biotype:protein_coding gene_symbol:Epb41l2 description:erythrocyte membrane protein band 4.1-like 2 [Source:RGD Symbol;Acc:1563977]	33	2	31	62	996	110.6	5.43	1.00727	1.01756	0.990535	1.02274	1.01445	0.986612	0.989207	0.982644	1.00267	Quantified
ENSRNOP00000069873	golgin B1	Golgb1	pep chromosome:Rnor_6.0:11:66761584:66807694:-1 gene:ENSRNOG00000030314.5 transcript:ENSRNOT00000083152.1 gene_biotype:protein_coding transcript_biotype:protein_coding gene_symbol:Golgb1 description:golgin B1 [Source:RGD Symbol;Acc:708429]	13	43	43	49	3228	368.9	5.06	1.00208	0.98026	1.02433	1.00393	1.01779	1.02915	1.00822	0.983266	0.964798	Quantified
ENSRNOP00000030030	carbamoyl-phosphate synthetase 2, aspartate transcarbamylase, and dihydroorotase	Cad	pep chromosome:Rnor_6.0:6:26657780:26680284:-1 gene:ENSRNOG00000026474.6 transcript:ENSRNOT00000039709.6 gene_biotype:protein_coding transcript_biotype:protein_coding gene_symbol:Cad description:carbamoyl-phosphate synthetase 2, aspartate transcarbamylase, and dihydroorotase [Source:RGD Symbol;Acc:1588606]	16	32	32	51	2224	243.2	6.54	1.04486	1.02242	0.991965	1.03735	0.947701	1.01468	0.96294	0.984509	1.00885	Quantified
ENSRNOP00000046593	ezrin	Ezr	pep chromosome:Rnor_6.0:1:47287874:47331412:-1 gene:ENSRNOG00000018524.6 transcript:ENSRNOT00000046746.3 gene_biotype:protein_coding transcript_biotype:protein_coding gene_symbol:Ezr description:ezrin [Source:RGD Symbol;Acc:621161]	45	22	33	116	586	69.3	6.1	0.999377	1.13248	1.28385	1.07888	0.87667	0.976879	0.870314	0.891919	0.902139	Quantified
ENSRNOP00000021105	5-aminoimidazole-4-carboxamide ribonucleotide formyltransferase/IMP cyclohydrolase	Atic	pep chromosome:Rnor_6.0:9:78862013:78882060:1 gene:ENSRNOG00000015511.4 transcript:ENSRNOT00000021105.4 gene_biotype:protein_coding transcript_biotype:protein_coding gene_symbol:Atic description:5-aminoimidazole-4-carboxamide ribonucleotide formyltransferase/IMP cyclohydrolase [Source:RGD Symbol;Acc:70879]	55	25	25	66	592	64.2	7.14	0.9797	1.01442	0.965655	0.982119	1.01269	0.977869	1.0103	1.03918	1.03245	Quantified
ENSRNOP00000068757	pyruvate carboxylase	Pc	pep chromosome:Rnor_6.0:1:219833299:219859847:1 gene:ENSRNOG00000019372.6 transcript:ENSRNOT00000087432.1 gene_biotype:protein_coding transcript_biotype:protein_coding gene_symbol:Pc description:pyruvate carboxylase [Source:RGD Symbol;Acc:3262]	30	31	31	59	1277	139.9	6.77	0.905347	1.01215	0.949674	1.0028	1.1278	0.949374	1.04028	0.994324	1.03107	Quantified
ENSRNOP00000023854	splicing factor 3b, subunit 3	Sf3b3	pep chromosome:Rnor_6.0:19:43392085:43429580:1 gene:ENSRNOG00000017724.6 transcript:ENSRNOT00000023854.6 gene_biotype:protein_coding transcript_biotype:protein_coding gene_symbol:Sf3b3 description:splicing factor 3b, subunit 3 [Source:RGD Symbol;Acc:1311636]	26	29	29	63	1217	135.5	5.26	0.997642	0.994836	0.986535	0.99809	1.01382	0.970347	1.00173	0.995237	1.05539	Quantified
ENSRNOP00000069876	heterogeneous nuclear ribonucleoprotein A3	Hnrnpa3	pep chromosome:Rnor_6.0:3:62481323:62487227:1 gene:ENSRNOG00000052968.1 transcript:ENSRNOT00000078872.1 gene_biotype:protein_coding transcript_biotype:protein_coding gene_symbol:Hnrnpa3 description:heterogeneous nuclear ribonucleoprotein A3 [Source:RGD Symbol;Acc:727807]	40	17	20	136	379	39.6	9.01	0.989766	0.978796	1.00817	1.03028	1.01466	0.931729	1.02302	0.998095	1.0377	Quantified
ENSRNOP00000017322	erythrocyte membrane protein band 4.1-like 2	Epb41l2	pep chromosome:Rnor_6.0:1:20893995:20962526:-1 gene:ENSRNOG00000012346.8 transcript:ENSRNOT00000017322.6 gene_biotype:protein_coding transcript_biotype:protein_coding gene_symbol:Epb41l2 description:erythrocyte membrane protein band 4.1-like 2 [Source:RGD Symbol;Acc:1563977]	35	1	30	61	926	102.5	5.35	0.987356	1.13837	0.914348	1.14761	0.897871	0.922962	0.930328	1.09011	0.988368	Quantified
ENSRNOP00000047134	tropomyosin 1	Tpm1	pep chromosome:Rnor_6.0:8:72814740:72841496:-1 gene:ENSRNOG00000018184.8 transcript:ENSRNOT00000040808.6 gene_biotype:protein_coding transcript_biotype:protein_coding gene_symbol:Tpm1 description:tropomyosin 1 [Source:RGD Symbol;Acc:3898]	73	5	28	148	284	32.8	4.75	0.977915	1.14766	0.908754	1.02665	1.0438	0.944868	1.0952	0.972688	0.893623	Quantified
ENSRNOP00000072853	hemoglobin, beta adult s chain	Hbb-bs	pep chromosome:Rnor_6.0:1:168964202:168965566:1 gene:ENSRNOG00000047098.2 transcript:ENSRNOT00000089102.1 gene_biotype:protein_coding transcript_biotype:protein_coding gene_symbol:Hbb-bs description:hemoglobin, beta adult s chain [Source:RGD Symbol;Acc:1597422]	81	3	13	774	147	16	8.79	0.867179	0.738453	0.971564	1.11282	0.986799	1.52765	0.868189	1.03552	0.92621	Quantified
ENSRNOP00000016376	cytoplasmic FMR1 interacting protein 1	Cyfip1	pep chromosome:Rnor_6.0:1:114258793:114347137:1 gene:ENSRNOG00000011945.7 transcript:ENSRNOT00000016376.5 gene_biotype:protein_coding transcript_biotype:protein_coding gene_symbol:Cyfip1 description:cytoplasmic FMR1 interacting protein 1 [Source:RGD Symbol;Acc:1310332]	28	34	34	66	1253	145.2	6.9	1.02715	1.02484	0.984758	0.980279	0.987056	0.999769	1.0056	1.00768	0.996655	Quantified
ENSRNOP00000075631	gelsolin	Gsn	pep chromosome:Rnor_6.0:3:14467330:14508911:1 gene:ENSRNOG00000018991.6 transcript:ENSRNOT00000078939.1 gene_biotype:protein_coding transcript_biotype:protein_coding gene_symbol:Gsn description:gelsolin [Source:RGD Symbol;Acc:1303089]	39	1	27	106	731	80.9	5.69	1.0029	1.02199	1.11404	1.04392	1.0077	1.01586	0.971834	0.961285	0.872875	Quantified
ENSRNOP00000015344	DnaJ heat shock protein family (Hsp40) member C13	Dnajc13	pep chromosome:Rnor_6.0:8:112698348:112807598:-1 gene:ENSRNOG00000011491.8 transcript:ENSRNOT00000015344.7 gene_biotype:protein_coding transcript_biotype:protein_coding gene_symbol:Dnajc13 description:DnaJ heat shock protein family (Hsp40) member C13 [Source:RGD Symbol;Acc:1308046]	16	39	39	60	2243	254.3	6.77	0.918683	0.96715	0.994246	0.997146	1.09423	1.09447	0.893047	1.01654	1.04348	Quantified
ENSRNOP00000019560	structural maintenance of chromosomes 3	Smc3	pep chromosome:Rnor_6.0:1:274309758:274352838:1 gene:ENSRNOG00000014173.7 transcript:ENSRNOT00000019560.7 gene_biotype:protein_coding transcript_biotype:protein_coding gene_symbol:Smc3 description:structural maintenance of chromosomes 3 [Source:RGD Symbol;Acc:62006]	32	40	40	60	1217	141.5	7.18	1.03637	1.0166	0.997911	1.00277	0.987668	0.94848	1.01157	0.982441	1.0283	Quantified
ENSRNOP00000070049	laminin subunit alpha 2	Lama2	pep chromosome:Rnor_6.0:1:18491384:19143269:1 gene:ENSRNOG00000011134.7 transcript:ENSRNOT00000079138.1 gene_biotype:protein_coding transcript_biotype:protein_coding gene_symbol:Lama2 description:laminin subunit alpha 2 [Source:RGD Symbol;Acc:1308889]	13	36	36	46	3121	343.6	6.19	1.00518	1.02657	0.963076	0.969485	1.04584	0.948017	1.02036	1.01008	1.02348	Quantified
ENSRNOP00000022233	coagulation factor II	F2	pep chromosome:Rnor_6.0:3:80529428:80543031:-1 gene:ENSRNOG00000016325.5 transcript:ENSRNOT00000022233.5 gene_biotype:protein_coding transcript_biotype:protein_coding gene_symbol:F2 description:coagulation factor II [Source:RGD Symbol;Acc:61996]	50	24	24	61	617	70.3	6.71	0.981982	1.01353	0.963943	1.01545	0.94705	1.00666	0.972753	1.04104	1.07482	Quantified
ENSRNOP00000032735	fibrinogen gamma chain	Fgg	pep chromosome:Rnor_6.0:2:181987217:181994514:1 gene:ENSRNOG00000025074.6 transcript:ENSRNOT00000034521.6 gene_biotype:protein_coding transcript_biotype:protein_coding gene_symbol:Fgg description:fibrinogen gamma chain [Source:RGD Symbol;Acc:2613]	51	22	22	120	437	49.6	6.25	0.972759	0.99019	0.968516	1.15911	1.02455	1.03056	0.954802	0.980247	0.935858	Quantified
ENSRNOP00000073686	carbonyl reductase	LOC102556347	pep chromosome:Rnor_6.0:11:33812662:33865933:1 gene:ENSRNOG00000049911.3 transcript:ENSRNOT00000085961.1 gene_biotype:protein_coding transcript_biotype:protein_coding gene_symbol:LOC102556347 description:carbonyl reductase [NADPH] 1-like [Source:RGD Symbol;Acc:7631561]	66	1	18	143	329	36.2	8.59	1.18119	0.836807	1.05121	1.14204	0.868921	1.18855	0.953239	0.94416	0.851319	Quantified
ENSRNOP00000043385	carbonyl reductase 1	Cbr1	pep chromosome:Rnor_6.0:11:33812989:33815418:1 gene:ENSRNOG00000047848.2 transcript:ENSRNOT00000042283.5 gene_biotype:protein_coding transcript_biotype:protein_coding gene_symbol:Cbr1 description:carbonyl reductase 1 [Source:RGD Symbol;Acc:2286]	78	1	18	144	277	30.6	7.77	1.18072	0.905987	1.07364	1.12647	0.861984	1.10501	0.972367	0.971808	0.816498	Quantified
ENSRNOP00000025857	gelsolin	Gsn	pep chromosome:Rnor_6.0:3:14482388:14508911:1 gene:ENSRNOG00000018991.6 transcript:ENSRNOT00000025857.5 gene_biotype:protein_coding transcript_biotype:protein_coding gene_symbol:Gsn description:gelsolin [Source:RGD Symbol;Acc:1303089]	37	1	27	104	780	86	6.09	0.986911	1.0096	1.0139	1.02119	0.991408	1.007	1.00444	0.995182	0.984773	Quantified
ENSRNOP00000024952	GDP dissociation inhibitor 2	Gdi2	pep chromosome:Rnor_6.0:17:70299183:70325855:-1 gene:ENSRNOG00000018091.6 transcript:ENSRNOT00000024952.6 gene_biotype:protein_coding transcript_biotype:protein_coding gene_symbol:Gdi2 description:GDP dissociation inhibitor 2 [Source:RGD Symbol;Acc:61802]	55	18	24	90	445	50.5	6.25	1.01379	1.03093	0.985034	1.00013	0.99453	0.999266	0.992369	1.00521	0.992918	Quantified
ENSRNOP00000070324	hemoglobin subunit beta	Hbb	pep chromosome:Rnor_6.0:1:168971274:168972725:-1 gene:ENSRNOG00000058105.1 transcript:ENSRNOT00000090422.1 gene_biotype:protein_coding transcript_biotype:protein_coding gene_symbol:Hbb description:hemoglobin subunit beta [Source:RGD Symbol;Acc:2783]	83	3	13	880	147	16	8.07	0.859831	0.712954	1.00458	1.08878	1.01332	1.56759	0.889098	1.04032	0.857436	Quantified
ENSRNOP00000044473	tropomyosin 2	Tpm2	pep chromosome:Rnor_6.0:5:59016622:59025631:-1 gene:ENSRNOG00000016731.8 transcript:ENSRNOT00000049000.6 gene_biotype:protein_coding transcript_biotype:protein_coding gene_symbol:Tpm2 description:tropomyosin 2 [Source:RGD Symbol;Acc:1559479]	62	10	25	106	284	32.9	4.67	0.962181	1.18877	0.894892	1.03932	1.08071	0.896944	1.13925	0.957634	0.848992	Quantified
ENSRNOP00000017686	acyl-CoA dehydrogenase, long chain	Acadl	pep chromosome:Rnor_6.0:9:73833388:73871888:-1 gene:ENSRNOG00000012966.7 transcript:ENSRNOT00000017686.7 gene_biotype:protein_coding transcript_biotype:protein_coding gene_symbol:Acadl description:acyl-CoA dehydrogenase, long chain [Source:RGD Symbol;Acc:2011]	48	20	20	121	430	47.8	7.74	0.949516	0.950897	1.00152	0.995372	1.06235	1.01201	1.03725	0.981765	1.02323	Quantified
ENSRNOP00000070183	signal transducer and activator of transcription 1	Stat1	pep chromosome:Rnor_6.0:9:54292312:54351339:-1 gene:ENSRNOG00000014079.7 transcript:ENSRNOT00000080522.1 gene_biotype:protein_coding transcript_biotype:protein_coding gene_symbol:Stat1 description:signal transducer and activator of transcription 1 [Source:RGD Symbol;Acc:3771]	28	28	28	81	1083	125.2	6.71	1.06713	1.045	1.02482	0.984004	0.975295	1.04778	0.971009	0.974953	0.923794	Quantified
ENSRNOP00000024710	hemopexin	Hpx	pep chromosome:Rnor_6.0:1:170423483:170431073:-1 gene:ENSRNOG00000018257.5 transcript:ENSRNOT00000024710.5 gene_biotype:protein_coding transcript_biotype:protein_coding gene_symbol:Hpx description:hemopexin [Source:RGD Symbol;Acc:62040]	48	22	22	249	460	51.3	7.65	0.881387	0.999343	0.968299	1.13335	0.948565	0.978513	0.924562	1.07335	1.1129	Quantified
ENSRNOP00000054446	tropomyosin 1	Tpm1	pep chromosome:Rnor_6.0:8:72814740:72841496:-1 gene:ENSRNOG00000018184.8 transcript:ENSRNOT00000057641.5 gene_biotype:protein_coding transcript_biotype:protein_coding gene_symbol:Tpm1 description:tropomyosin 1 [Source:RGD Symbol;Acc:3898]	70	1	27	128	284	32.8	4.78	0.967645	1.11666	0.956481	1.02862	1.05679	0.94928	1.06372	0.964659	0.907365	Quantified
ENSRNOP00000060229	succinate-CoA ligase ADP-forming beta subunit	Sucla2	pep chromosome:Rnor_6.0:15:55461695:55516952:1 gene:ENSRNOG00000017481.6 transcript:ENSRNOT00000065195.3 gene_biotype:protein_coding transcript_biotype:protein_coding gene_symbol:Sucla2 description:succinate-CoA ligase ADP-forming beta subunit [Source:RGD Symbol;Acc:1309397]	54	22	22	105	465	50.3	7.69	0.957176	0.934514	0.946918	0.924562	1.04283	1.09234	1.04578	1.00459	1.06819	Quantified
ENSRNOP00000070792	hydroxysteroid (17-beta) dehydrogenase 4	Hsd17b4	pep chromosome:Rnor_6.0:18:44810472:44897580:1 gene:ENSRNOG00000015840.7 transcript:ENSRNOT00000089750.1 gene_biotype:protein_coding transcript_biotype:protein_coding gene_symbol:Hsd17b4 description:hydroxysteroid (17-beta) dehydrogenase 4 [Source:RGD Symbol;Acc:621806]	37	24	24	78	751	81	8.48	1.0059	0.988187	0.978149	0.9869	0.988381	1.01323	1.00276	1.00119	1.05036	Quantified
ENSRNOP00000020767	mannosidase, alpha, class 2A, member 1	Man2a1	pep chromosome:Rnor_6.0:9:112293388:112451677:1 gene:ENSRNOG00000015439.7 transcript:ENSRNOT00000020767.6 gene_biotype:protein_coding transcript_biotype:protein_coding gene_symbol:Man2a1 description:mannosidase, alpha, class 2A, member 1 [Source:RGD Symbol;Acc:3038]	32	31	33	57	1148	131.2	8.32	1.07797	0.956643	0.964953	1.02454	0.9801	1.06592	0.985817	0.966664	0.992693	Quantified
ENSRNOP00000000211	von Willebrand factor A domain containing 5A	Vwa5a	pep chromosome:Rnor_6.0:3:158997834:159021582:1 gene:ENSRNOG00000046414.2 transcript:ENSRNOT00000000211.5 gene_biotype:protein_coding transcript_biotype:protein_coding gene_symbol:Vwa5a description:von Willebrand factor A domain containing 5A [Source:RGD Symbol;Acc:735145]	36	27	27	86	796	88	6.47	1.0845	0.973253	1.01684	1.06976	0.922269	1.04826	0.998638	0.970454	0.930568	Quantified
ENSRNOP00000018711	cyclase associated actin cytoskeleton regulatory protein 1	Cap1	pep chromosome:Rnor_6.0:5:140559206:140585408:-1 gene:ENSRNOG00000013492.4 transcript:ENSRNOT00000018711.4 gene_biotype:protein_coding transcript_biotype:protein_coding gene_symbol:Cap1 description:cyclase associated actin cytoskeleton regulatory protein 1 [Source:RGD Symbol;Acc:620309]	51	19	20	69	474	51.6	7.52	1.0574	1.05759	0.98705	0.982527	0.995241	0.977482	1.01371	0.975988	0.964858	Quantified
ENSRNOP00000016137	5-hydroxymethylcytosine binding, ES cell specific	Hmces	pep chromosome:Rnor_6.0:4:119815246:119839683:1 gene:ENSRNOG00000010474.7 transcript:ENSRNOT00000016137.6 gene_biotype:protein_coding transcript_biotype:protein_coding gene_symbol:Hmces description:5-hydroxymethylcytosine binding, ES cell specific [Source:RGD Symbol;Acc:1559800]	35	25	27	56	874	97.6	5.39	1.03023	1.0021	0.996531	1.00734	0.984609	1.01099	0.984338	1.0062	0.99205	Quantified
ENSRNOP00000029068	keratin 8	Krt8	pep chromosome:Rnor_6.0:7:143596511:143603803:-1 gene:ENSRNOG00000009779.5 transcript:ENSRNOT00000038480.4 gene_biotype:protein_coding transcript_biotype:protein_coding gene_symbol:Krt8 description:keratin 8 [Source:RGD Symbol;Acc:2984]	49	18	25	114	483	54	6	0.764133	1.07199	1.66323	1.15871	0.970535	0.905693	0.72602	0.921848	0.829017	Quantified
ENSRNOP00000014104	flotillin 2	Flot2	pep chromosome:Rnor_6.0:10:65304902:65329312:-1 gene:ENSRNOG00000009681.8 transcript:ENSRNOT00000014104.7 gene_biotype:protein_coding transcript_biotype:protein_coding gene_symbol:Flot2 description:flotillin 2 [Source:RGD Symbol;Acc:70993]	56	21	21	44	428	47	5.2	0.974828	0.971931	0.919303	0.951475	1.08075	1.04379	1.0164	1.01516	1.04187	Quantified
ENSRNOP00000075905	UPF1, RNA helicase and ATPase	Upf1	pep chromosome:Rnor_6.0:16:20824877:20844844:1 gene:ENSRNOG00000020134.7 transcript:ENSRNOT00000092446.1 gene_biotype:protein_coding transcript_biotype:protein_coding gene_symbol:Upf1 description:UPF1, RNA helicase and ATPase [Source:RGD Symbol;Acc:1589127]	29	31	31	61	1124	123.9	6.61	1.00566	0.993769	0.983847	1.04793	0.988991	1.01789	0.976927	0.982186	1.01832	Quantified
ENSRNOP00000012847	chaperonin containing TCP1 subunit 4	Cct4	pep chromosome:Rnor_6.0:14:107767392:107780270:1 gene:ENSRNOG00000009642.3 transcript:ENSRNOT00000012847.3 gene_biotype:protein_coding transcript_biotype:protein_coding gene_symbol:Cct4 description:chaperonin containing TCP1 subunit 4 [Source:RGD Symbol;Acc:727937]	53	25	25	103	539	58.1	8.02	1.0017	0.965239	1.00771	1.05292	0.962922	1.05838	0.994402	0.986206	0.986903	Quantified
ENSRNOP00000014859	importin 5	Ipo5	pep chromosome:Rnor_6.0:15:106257650:106292112:1 gene:ENSRNOG00000010989.8 transcript:ENSRNOT00000014859.8 gene_biotype:protein_coding transcript_biotype:protein_coding gene_symbol:Ipo5 description:importin 5 [Source:RGD Symbol;Acc:1308715]	26	26	27	67	1097	123.6	4.96	1.07429	0.990798	1.00299	1.02624	0.96465	1.05446	0.97656	0.970831	0.953852	Quantified
ENSRNOP00000046923	synemin	Synm	pep chromosome:Rnor_6.0:1:128692120:128722048:-1 gene:ENSRNOG00000014030.7 transcript:ENSRNOT00000050832.4 gene_biotype:protein_coding transcript_biotype:protein_coding gene_symbol:Synm description:synemin [Source:RGD Symbol;Acc:727872]	24	33	33	39	1557	172.8	5.1	0.941442	1.09328	0.920875	1.00209	1.05854	0.979153	1.12321	0.98024	0.913247	Quantified
ENSRNOP00000013462	ribosomal protein L4	Rpl4	pep chromosome:Rnor_6.0:8:69121682:69126805:1 gene:ENSRNOG00000009378.7 transcript:ENSRNOT00000013461.7 gene_biotype:protein_coding transcript_biotype:protein_coding gene_symbol:Rpl4 description:ribosomal protein L4 [Source:RGD Symbol;Acc:619824]	49	22	22	109	421	47.3	11.02	1.07223	0.965139	1.02248	0.973674	0.937269	1.01483	0.998795	0.993137	1.03633	Quantified
ENSRNOP00000008813	hexokinase 2	Hk2	pep chromosome:Rnor_6.0:4:113559427:113610243:-1 gene:ENSRNOG00000006116.3 transcript:ENSRNOT00000008813.3 gene_biotype:protein_coding transcript_biotype:protein_coding gene_symbol:Hk2 description:hexokinase 2 [Source:RGD Symbol;Acc:2797]	33	23	28	70	917	102.5	6.1	1.00016	0.91768	0.942578	0.939797	0.99446	1.17791	1.02054	1.0023	1.02397	Quantified
ENSRNOP00000069919	transgelin	Tagln	pep chromosome:Rnor_6.0:8:50223089:50231357:-1 gene:ENSRNOG00000017628.6 transcript:ENSRNOT00000081737.1 gene_biotype:protein_coding transcript_biotype:protein_coding gene_symbol:Tagln description:transgelin [Source:RGD Symbol;Acc:3723]	75	16	16	215	207	23.3	8.66	0.93117	1.27819	0.876275	1.06039	1.07676	0.901099	1.10312	0.978419	0.804728	Quantified
ENSRNOP00000013582	purine nucleoside phosphorylase	Pnp	pep chromosome:Rnor_6.0:15:27875911:27883350:1 gene:ENSRNOG00000009982.6 transcript:ENSRNOT00000013582.6 gene_biotype:protein_coding transcript_biotype:protein_coding gene_symbol:Pnp description:purine nucleoside phosphorylase [Source:RGD Symbol;Acc:1597189]	67	14	14	103	289	32.3	6.93	0.938182	0.989882	0.984111	0.938561	1.0217	1.04517	1.04966	0.998437	1.04989	Quantified
ENSRNOP00000060007	fibrinogen alpha chain	Fga	pep chromosome:Rnor_6.0:2:182006242:182013763:1 gene:ENSRNOG00000024848.7 transcript:ENSRNOT00000064091.3 gene_biotype:protein_coding transcript_biotype:protein_coding gene_symbol:Fga description:fibrinogen alpha chain [Source:RGD Symbol;Acc:2603]	27	23	23	130	782	86.6	5.74	0.948005	1.00613	0.963678	1.22283	1.04219	1.0445	0.925042	0.982959	0.882402	Quantified
ENSRNOP00000075266	alanyl-tRNA synthetase	Aars	pep chromosome:Rnor_6.0:19:43193257:43215077:-1 gene:ENSRNOG00000018404.7 transcript:ENSRNOT00000082151.1 gene_biotype:protein_coding transcript_biotype:protein_coding gene_symbol:Aars description:alanyl-tRNA synthetase [Source:RGD Symbol;Acc:1304832]	33	27	27	56	968	106.7	5.62	1.0251	0.997512	0.998358	1.00835	0.994862	1.05511	0.98326	0.996888	0.955783	Quantified
ENSRNOP00000027407	cathepsin D	Ctsd	pep chromosome:Rnor_6.0:1:215541542:215553451:-1 gene:ENSRNOG00000020206.7 transcript:ENSRNOT00000027407.4 gene_biotype:protein_coding transcript_biotype:protein_coding gene_symbol:Ctsd description:cathepsin D [Source:RGD Symbol;Acc:621511]	42	14	14	149	407	44.6	7.09	1.01161	0.997711	0.834966	0.867191	0.958927	1.0786	1.0907	1.10291	1.07527	Quantified
ENSRNOP00000044233	hemoglobin alpha, adult chain 1	Hba-a1	pep chromosome:Rnor_6.0:10:15602794:15603649:-1 gene:ENSRNOG00000029886.3 transcript:ENSRNOT00000051483.3 gene_biotype:protein_coding transcript_biotype:protein_coding gene_symbol:Hba-a1 description:hemoglobin alpha, adult chain 1 [Source:RGD Symbol;Acc:2782]	75	3	13	986	142	15.3	7.97	0.874601	0.763685	0.946365	1.11429	0.96699	1.50326	0.859141	1.0858	0.920522	Quantified
ENSRNOP00000025284	leucyl-tRNA synthetase 1	Lars1	pep chromosome:Rnor_6.0:18:36524007:36579403:-1 gene:ENSRNOG00000018304.7 transcript:ENSRNOT00000025284.7 gene_biotype:protein_coding transcript_biotype:protein_coding gene_symbol:Lars1 description:leucyl-tRNA synthetase 1 [Source:RGD Symbol;Acc:1304962]	27	31	31	53	1178	134.2	7.28	1.02934	1.01092	0.948861	0.98114	0.991534	1.01567	0.996701	1.01042	1.03041	Quantified
ENSRNOP00000065252	synaptotagmin binding, cytoplasmic RNA interacting protein	Syncrip	pep chromosome:Rnor_6.0:8:96105025:96203677:-1 gene:ENSRNOG00000000204.7 transcript:ENSRNOT00000074515.2 gene_biotype:protein_coding transcript_biotype:protein_coding gene_symbol:Syncrip description:synaptotagmin binding, cytoplasmic RNA interacting protein [Source:RGD Symbol;Acc:1305683]	44	17	23	70	562	62.6	7.56	1.00024	0.97226	1.02844	1.01898	1.00229	1.01207	1.00351	0.969328	1.00681	Quantified
ENSRNOP00000026949	matrin 3	Matr3	pep chromosome:Rnor_6.0:18:28361283:28390696:1 gene:ENSRNOG00000019875.6 transcript:ENSRNOT00000026949.5 gene_biotype:protein_coding transcript_biotype:protein_coding gene_symbol:Matr3 description:matrin 3 [Source:RGD Symbol;Acc:3052]	35	29	29	76	845	94.4	6.25	1.01046	0.999753	0.994251	1.00443	0.997377	0.947188	1.01558	0.990524	1.05312	Quantified
ENSRNOP00000069366	tyrosine 3-monooxygenase/tryptophan 5-monooxygenase activation protein, zeta	Ywhaz	pep chromosome:Rnor_6.0:7:75575763:75597087:-1 gene:ENSRNOG00000008195.6 transcript:ENSRNOT00000080676.1 gene_biotype:protein_coding transcript_biotype:protein_coding gene_symbol:Ywhaz description:tyrosine 3-monooxygenase/tryptophan 5-monooxygenase activation protein, zeta [Source:RGD Symbol;Acc:3980]	69	12	18	149	256	29	4.78	0.9721	1.05644	0.96529	1.04066	1.03069	0.989243	1.03278	1.02676	0.899559	Quantified
ENSRNOP00000015971	heterogeneous nuclear ribonucleoprotein R	Hnrnpr	pep chromosome:Rnor_6.0:5:154668179:154699966:1 gene:ENSRNOG00000011910.7 transcript:ENSRNOT00000015971.7 gene_biotype:protein_coding transcript_biotype:protein_coding gene_symbol:Hnrnpr description:heterogeneous nuclear ribonucleoprotein R [Source:RGD Symbol;Acc:631348]	36	17	23	61	632	70.8	8.13	0.996402	1.00941	0.991589	1.00983	1.01535	0.947817	1.01451	0.998703	1.02904	Quantified
ENSRNOP00000032812	tensin 1	Tns1	pep chromosome:Rnor_6.0:9:81194119:81400987:-1 gene:ENSRNOG00000014182.6 transcript:ENSRNOT00000035277.5 gene_biotype:protein_coding transcript_biotype:protein_coding gene_symbol:Tns1 description:tensin 1 [Source:RGD Symbol;Acc:68427]	19	27	31	55	1909	203.8	7.77	0.999575	1.07037	0.958676	1.00932	1.01133	0.978491	1.02739	0.979252	0.978747	Quantified
ENSRNOP00000016428	myosin VI	Myo6	pep chromosome:Rnor_6.0:8:87630916:87731269:1 gene:ENSRNOG00000011852.8 transcript:ENSRNOT00000016428.8 gene_biotype:protein_coding transcript_biotype:protein_coding gene_symbol:Myo6 description:myosin VI [Source:RGD Symbol;Acc:1560646]	27	31	32	44	1285	148	8.41	0.971155	0.994906	1.06004	0.998078	1.00253	0.986015	0.998533	0.99729	1.00494	Quantified
ENSRNOP00000001500	phosphatidylethanolamine binding protein 1	Pebp1	pep chromosome:Rnor_6.0:12:45026886:45031145:1 gene:ENSRNOG00000001136.6 transcript:ENSRNOT00000001500.6 gene_biotype:protein_coding transcript_biotype:protein_coding gene_symbol:Pebp1 description:phosphatidylethanolamine binding protein 1 [Source:RGD Symbol;Acc:62017]	72	10	10	98	187	20.8	5.8	0.972844	1.02949	1.01523	1.0354	1.05392	0.948843	0.979966	0.950823	1.02602	Quantified
ENSRNOP00000005930	leukotriene A4 hydrolase	Lta4h	pep chromosome:Rnor_6.0:7:34288365:34320235:1 gene:ENSRNOG00000004494.5 transcript:ENSRNOT00000005930.4 gene_biotype:protein_coding transcript_biotype:protein_coding gene_symbol:Lta4h description:leukotriene A4 hydrolase [Source:RGD Symbol;Acc:1311333]	45	23	23	70	611	69	6.2	1.00051	1.02259	1.05326	1.03615	0.979565	0.991006	0.982081	0.993924	0.954499	Quantified
ENSRNOP00000076307	isoleucyl-tRNA synthetase 1	Iars1	pep chromosome:Rnor_6.0:17:15356019:15402649:-1 gene:ENSRNOG00000014616.8 transcript:ENSRNOT00000093637.1 gene_biotype:protein_coding transcript_biotype:protein_coding gene_symbol:Iars1 description:isoleucyl-tRNA synthetase 1 [Source:RGD Symbol;Acc:621022]	27	31	31	63	1262	144.2	6.3	0.987622	0.982049	0.991946	0.973634	0.996467	1.04736	1.01056	1.01011	1.01594	Quantified
ENSRNOP00000023342	insulin degrading enzyme	Ide	pep chromosome:Rnor_6.0:1:255915313:256013495:-1 gene:ENSRNOG00000016833.7 transcript:ENSRNOT00000023342.3 gene_biotype:protein_coding transcript_biotype:protein_coding gene_symbol:Ide description:insulin degrading enzyme [Source:RGD Symbol;Acc:2861]	29	31	31	61	1019	117.6	6.61	1.01997	0.99423	0.976296	0.999043	0.987008	1.02959	0.997646	1.01377	0.997617	Quantified
ENSRNOP00000010932	elastin microfibril interfacer 1	Emilin1	pep chromosome:Rnor_6.0:6:26821255:26828972:-1 gene:ENSRNOG00000008246.5 transcript:ENSRNOT00000010932.5 gene_biotype:protein_coding transcript_biotype:protein_coding gene_symbol:Emilin1 description:elastin microfibril interfacer 1 [Source:RGD Symbol;Acc:1311209]	34	30	30	56	900	94.4	4.98	1.04839	1.05608	0.941103	1.03078	1.02758	0.998413	1.05234	1.01559	0.841572	Quantified
ENSRNOP00000068857	caldesmon 1	Cald1	pep chromosome:Rnor_6.0:4:62220736:62291489:1 gene:ENSRNOG00000010233.5 transcript:ENSRNOT00000086377.1 gene_biotype:protein_coding transcript_biotype:protein_coding gene_symbol:Cald1 description:caldesmon 1 [Source:RGD Symbol;Acc:2256]	34	1	31	63	636	72.2	6.71	0.994084	1.11013	0.962671	1.01542	1.02604	0.974671	1.02778	0.986745	0.914956	Quantified
ENSRNOP00000025689	glutathione S-transferase, mu 7	Gstm7	pep chromosome:Rnor_6.0:2:210720720:210726179:-1 gene:ENSRNOG00000018937.4 transcript:ENSRNOT00000025689.4 gene_biotype:protein_coding transcript_biotype:protein_coding gene_symbol:Gstm7 description:glutathione S-transferase, mu 7 [Source:RGD Symbol;Acc:621287]	74	7	17	89	218	25.7	7.33	0.932108	1.02066	1.07793	1.04781	1.02139	0.908595	0.977891	0.999982	1.02599	Quantified
ENSRNOP00000057257	heterogeneous nuclear ribonucleoproteins C1/C2-like	LOC100911576	pep chromosome:Rnor_6.0:14:88543630:88574195:1 gene:ENSRNOG00000050800.2 transcript:ENSRNOT00000060515.4 gene_biotype:protein_coding transcript_biotype:protein_coding gene_symbol:LOC100911576 description:heterogeneous nuclear ribonucleoproteins C1/C2-like [Source:RGD Symbol;Acc:6491888]	54	18	18	83	300	33	5.03	1.03783	0.998576	0.995224	1.00503	0.978872	0.913122	1.02208	0.993937	1.06683	Quantified
ENSRNOP00000004174	GC, vitamin D binding protein	Gc	pep chromosome:Rnor_6.0:14:20266891:20302581:1 gene:ENSRNOG00000003119.4 transcript:ENSRNOT00000004174.4 gene_biotype:protein_coding transcript_biotype:protein_coding gene_symbol:Gc description:GC, vitamin D binding protein [Source:RGD Symbol;Acc:2667]	51	23	23	80	476	53.5	5.86	0.967951	1.12038	1.02687	1.06689	0.914589	0.929875	0.926294	1.03842	1.02435	Quantified
ENSRNOP00000043767	caldesmon 1	Cald1	pep chromosome:Rnor_6.0:4:62221011:62290229:1 gene:ENSRNOG00000010233.5 transcript:ENSRNOT00000041264.3 gene_biotype:protein_coding transcript_biotype:protein_coding gene_symbol:Cald1 description:caldesmon 1 [Source:RGD Symbol;Acc:2256]	41	1	31	63	531	60.6	6.58	0.953523	1.02182	1.06449	1.05831	0.99754	0.972792	0.973245	1.02209	0.950201	Quantified
ENSRNOP00000016450	proteasome 26S subunit, ATPase 2	Psmc2	pep chromosome:Rnor_6.0:4:9867101:9881484:-1 gene:ENSRNOG00000012026.6 transcript:ENSRNOT00000016450.6 gene_biotype:protein_coding transcript_biotype:protein_coding gene_symbol:Psmc2 description:proteasome 26S subunit, ATPase 2 [Source:RGD Symbol;Acc:3428]	59	24	24	74	433	48.6	5.95	1.0399	0.99272	0.986668	1.01122	0.993023	1.00539	0.994816	1.01108	0.979055	Quantified
ENSRNOP00000013961	Serine protease inhibitor	LOC299282	pep chromosome:Rnor_6.0:6:128050311:128062241:1 gene:ENSRNOG00000010478.7 transcript:ENSRNOT00000013961.6 gene_biotype:protein_coding transcript_biotype:protein_coding gene_symbol:LOC299282 description:Serine protease inhibitor [Source:RGD Symbol;Acc:3745]	35	6	16	77	610	68.1	5.45	0.939133	1.23443	1.11087	1.04965	0.825592	0.969205	0.909213	1.10032	0.878553	Quantified
ENSRNOP00000024863	transaldolase 1	Taldo1	pep chromosome:Rnor_6.0:1:214375515:214385885:1 gene:ENSRNOG00000018367.6 transcript:ENSRNOT00000024863.6 gene_biotype:protein_coding transcript_biotype:protein_coding gene_symbol:Taldo1 description:transaldolase 1 [Source:RGD Symbol;Acc:620674]	46	19	19	105	337	37.4	7.03	1.01935	0.999368	1.05411	0.998374	1.0238	0.982929	1.01371	0.937054	0.982698	Quantified
ENSRNOP00000010701	EH-domain containing 4	Ehd4	pep chromosome:Rnor_6.0:3:111877853:111941841:-1 gene:ENSRNOG00000007584.4 transcript:ENSRNOT00000010701.4 gene_biotype:protein_coding transcript_biotype:protein_coding gene_symbol:Ehd4 description:EH-domain containing 4 [Source:RGD Symbol;Acc:628883]	48	21	25	52	541	61.4	6.76	1.03048	1.07674	1.03702	0.925032	0.992856	1.00144	0.971922	0.967341	1.0101	Quantified
ENSRNOP00000013896	serine (or cysteine) proteinase inhibitor, clade A, member 3C	Serpina3c	pep chromosome:Rnor_6.0:6:127996165:128003418:-1 gene:ENSRNOG00000010410.6 transcript:ENSRNOT00000013896.4 gene_biotype:protein_coding transcript_biotype:protein_coding gene_symbol:Serpina3c description:serine (or cysteine) proteinase inhibitor, clade A, member 3C [Source:RGD Symbol;Acc:2972]	37	11	15	73	416	46.4	5.44	0.95224	1.20512	1.14116	1.00298	0.786654	0.953157	0.908635	1.09082	0.976067	Quantified
ENSRNOP00000070171	GDP dissociation inhibitor 1	Gdi1	pep chromosome:Rnor_6.0:X:156400736:156407404:-1 gene:ENSRNOG00000056870.1 transcript:ENSRNOT00000089814.1 gene_biotype:protein_coding transcript_biotype:protein_coding gene_symbol:Gdi1 description:GDP dissociation inhibitor 1 [Source:RGD Symbol;Acc:2676]	60	16	22	100	447	50.5	5.14	0.971008	1.02147	0.982705	1.02141	1.0181	0.981915	0.992632	1.01403	1.01126	Quantified
ENSRNOP00000019531	t-complex 1	Tcp1	pep chromosome:Rnor_6.0:1:48025663:48033343:-1 gene:ENSRNOG00000014160.4 transcript:ENSRNOT00000019531.4 gene_biotype:protein_coding transcript_biotype:protein_coding gene_symbol:Tcp1 description:t-complex 1 [Source:RGD Symbol;Acc:3832]	41	20	20	67	556	60.3	6.21	1.02212	1.00589	0.983349	1.02278	0.994688	1.01239	0.974731	0.988446	1.01045	Quantified
ENSRNOP00000074206	epoxide hydrolase 1	Ephx1	pep chromosome:Rnor_6.0:13:99271366:99300579:-1 gene:ENSRNOG00000003515.6 transcript:ENSRNOT00000085279.1 gene_biotype:protein_coding transcript_biotype:protein_coding gene_symbol:Ephx1 description:epoxide hydrolase 1 [Source:RGD Symbol;Acc:2557]	55	23	23	105	455	52.5	8.51	0.868456	0.904189	1.04637	1.03938	1.04969	0.951662	1.08976	1.02556	1.03827	Quantified
ENSRNOP00000060990	succinate-CoA ligase, GDP-forming, beta subunit	Suclg2	pep chromosome:Rnor_6.0:4:127552101:127824970:-1 gene:ENSRNOG00000005686.6 transcript:ENSRNOT00000068274.2 gene_biotype:protein_coding transcript_biotype:protein_coding gene_symbol:Suclg2 description:succinate-CoA ligase, GDP-forming, beta subunit [Source:RGD Symbol;Acc:1305008]	58	23	23	82	431	46.6	7.71	0.999098	1.05054	1.01683	1.02586	1.01036	0.929611	0.969225	0.993893	1.01707	Quantified
ENSRNOP00000024947	tubulin, beta 6 class V	Tubb6	pep chromosome:Rnor_6.0:18:63130542:63140181:1 gene:ENSRNOG00000018371.4 transcript:ENSRNOT00000024947.4 gene_biotype:protein_coding transcript_biotype:protein_coding gene_symbol:Tubb6 description:tubulin, beta 6 class V [Source:RGD Symbol;Acc:1305887]	43	5	17	174	447	50	4.89	1.08262	1.03331	0.933626	0.939047	1.03489	1.04318	0.947785	0.930432	1.06954	Quantified
ENSRNOP00000073769	pitrilysin metallopeptidase 1	Pitrm1	pep chromosome:Rnor_6.0:17:68477446:68509120:1 gene:ENSRNOG00000016511.6 transcript:ENSRNOT00000086236.1 gene_biotype:protein_coding transcript_biotype:protein_coding gene_symbol:Pitrm1 description:pitrilysin metallopeptidase 1 [Source:RGD Symbol;Acc:1310998]	34	31	31	63	1035	117.3	6.89	0.965582	0.986828	0.951756	1.00528	1.04438	1.02697	1.02922	1.00516	0.999918	Quantified
ENSRNOP00000075826	clustered mitochondria homolog	Cluh	pep chromosome:Rnor_6.0:10:61432850:61454444:1 gene:ENSRNOG00000002669.9 transcript:ENSRNOT00000092478.1 gene_biotype:protein_coding transcript_biotype:protein_coding gene_symbol:Cluh description:clustered mitochondria homolog [Source:RGD Symbol;Acc:1307222]	28	37	37	60	1349	151.1	6.02	1.03755	1.01297	0.980965	1.02914	0.972249	0.968346	1.01033	0.97577	1.02588	Quantified
ENSRNOP00000007100	tyrosine 3-monooxygenase/tryptophan 5-monooxygenase activation protein, epsilon	Ywhae	pep chromosome:Rnor_6.0:10:63884338:63921709:1 gene:ENSRNOG00000005290.5 transcript:ENSRNOT00000007100.5 gene_biotype:protein_coding transcript_biotype:protein_coding gene_symbol:Ywhae description:tyrosine 3-monooxygenase/tryptophan 5-monooxygenase activation protein, epsilon [Source:RGD Symbol;Acc:62000]	67	17	20	152	255	29.2	4.74	1.0395	1.05244	0.968	0.997041	0.959437	0.946402	0.988124	1.00633	1.05619	Quantified
ENSRNOP00000075146	threonyl-tRNA synthetase 1	Tars1	pep chromosome:Rnor_6.0:2:61394770:61414102:-1 gene:ENSRNOG00000019023.6 transcript:ENSRNOT00000088202.1 gene_biotype:protein_coding transcript_biotype:protein_coding gene_symbol:Tars1 description:threonyl-tRNA synthetase 1 [Source:RGD Symbol;Acc:1359527]	41	25	26	57	722	83.3	7.03	0.995994	1.01018	0.98131	1.00629	0.99272	1.0156	0.993006	1.00093	1.0192	Quantified
ENSRNOP00000024617	tropomyosin 1	Tpm1	pep chromosome:Rnor_6.0:8:72814740:72836159:-1 gene:ENSRNOG00000018184.8 transcript:ENSRNOT00000024617.7 gene_biotype:protein_coding transcript_biotype:protein_coding gene_symbol:Tpm1 description:tropomyosin 1 [Source:RGD Symbol;Acc:3898]	71	5	23	131	248	28.5	4.77	0.950402	1.17714	0.889846	1.0244	1.07455	0.912816	1.09043	0.987309	0.903901	Quantified
ENSRNOP00000071702	apolipoprotein E	Apoe	pep chromosome:Rnor_6.0:1:80612895:80617057:-1 gene:ENSRNOG00000018454.7 transcript:ENSRNOT00000080453.1 gene_biotype:protein_coding transcript_biotype:protein_coding gene_symbol:Apoe description:apolipoprotein E [Source:RGD Symbol;Acc:2138]	49	19	19	148	359	41.2	5.83	1.12377	0.985714	1.01272	0.95874	0.967409	1.02961	0.983731	0.951878	0.99897	Quantified
ENSRNOP00000027425	heterogeneous nuclear ribonucleoprotein L	Hnrnpl	pep chromosome:Rnor_6.0:1:86996093:87006776:1 gene:ENSRNOG00000020235.8 transcript:ENSRNOT00000027425.7 gene_biotype:protein_coding transcript_biotype:protein_coding gene_symbol:Hnrnpl description:heterogeneous nuclear ribonucleoprotein L [Source:RGD Symbol;Acc:71059]	39	17	17	78	623	67.9	8.47	1.01399	1.00837	0.985782	0.97229	0.976713	0.926072	1.02326	1.00144	1.10463	Quantified
ENSRNOP00000047962	collagen type XVIII alpha 1 chain	Col18a1	pep chromosome:Rnor_6.0:20:12225202:12332858:1 gene:ENSRNOG00000001229.6 transcript:ENSRNOT00000045315.4 gene_biotype:protein_coding transcript_biotype:protein_coding gene_symbol:Col18a1 description:collagen type XVIII alpha 1 chain [Source:RGD Symbol;Acc:70936]	15	18	18	50	1311	134.6	6.29	0.961917	1.01863	0.954709	0.983106	1.01249	1.04099	1.01252	1.02441	1.00751	Quantified
ENSRNOP00000011429	malate dehydrogenase 1	Mdh1	pep chromosome:Rnor_6.0:14:106378942:106393670:-1 gene:ENSRNOG00000008103.7 transcript:ENSRNOT00000011429.7 gene_biotype:protein_coding transcript_biotype:protein_coding gene_symbol:Mdh1 description:malate dehydrogenase 1 [Source:RGD Symbol;Acc:3072]	46	16	16	112	334	36.5	6.58	1.00815	1.09103	1.02467	0.997525	0.996751	0.930756	0.977888	0.980068	1.00508	Quantified
ENSRNOP00000063784	monoamine oxidase A	Maoa	pep chromosome:Rnor_6.0:X:6554698:6620722:-1 gene:ENSRNOG00000002848.7 transcript:ENSRNOT00000066674.2 gene_biotype:protein_coding transcript_biotype:protein_coding gene_symbol:Maoa description:monoamine oxidase A [Source:RGD Symbol;Acc:61898]	34	19	19	80	526	59.5	7.93	0.990192	0.974795	0.935043	0.932913	0.998427	1.16595	1.0358	0.990639	0.994908	Quantified
ENSRNOP00000021134	MYB binding protein 1a	Mybbp1a	pep chromosome:Rnor_6.0:10:59000397:59010903:1 gene:ENSRNOG00000015236.5 transcript:ENSRNOT00000021134.3 gene_biotype:protein_coding transcript_biotype:protein_coding gene_symbol:Mybbp1a description:MYB binding protein 1a [Source:RGD Symbol;Acc:62062]	25	34	34	50	1344	152.2	8.95	1.05534	0.996868	0.994327	1.00038	0.960304	1.00645	0.984019	1.00063	1.01595	Quantified
ENSRNOP00000071906	prolyl endopeptidase	Prep	pep chromosome:Rnor_6.0:20:50172618:50269992:1 gene:ENSRNOG00000051061.2 transcript:ENSRNOT00000091456.1 gene_biotype:protein_coding transcript_biotype:protein_coding gene_symbol:Prep description:prolyl endopeptidase [Source:RGD Symbol;Acc:620841]	45	26	26	57	709	80.4	5.87	1.01953	1.04231	0.978943	1.03787	0.994467	0.964292	0.976122	0.987501	1.01263	Quantified
ENSRNOP00000014637	hydroxyacyl-CoA dehydrogenase trifunctional multienzyme complex subunit beta	Hadhb	pep chromosome:Rnor_6.0:6:27555412:27582995:-1 gene:ENSRNOG00000010800.6 transcript:ENSRNOT00000014637.6 gene_biotype:protein_coding transcript_biotype:protein_coding gene_symbol:Hadhb description:hydroxyacyl-CoA dehydrogenase trifunctional multienzyme complex subunit beta [Source:RGD Symbol;Acc:620513]	40	18	18	123	475	51.4	9.47	0.989618	0.915832	0.976262	0.966946	1.01832	0.945291	1.0611	1.02375	1.11563	Quantified
ENSRNOP00000025980	heterogeneous nuclear ribonucleoprotein K	Hnrnpk	pep chromosome:Rnor_6.0:17:6665659:6675944:1 gene:ENSRNOG00000019113.7 transcript:ENSRNOT00000025980.7 gene_biotype:protein_coding transcript_biotype:protein_coding gene_symbol:Hnrnpk description:heterogeneous nuclear ribonucleoprotein K [Source:RGD Symbol;Acc:71058]	47	20	20	104	464	51	5.33	1.00989	1.00889	1.01934	1.02962	1.00662	0.934852	1.01259	0.995402	0.994498	Quantified
ENSRNOP00000026416	heterogeneous nuclear ribonucleoprotein U-like 2	Hnrnpul2	pep chromosome:Rnor_6.0:1:225015616:225027710:1 gene:ENSRNOG00000019507.6 transcript:ENSRNOT00000026416.6 gene_biotype:protein_coding transcript_biotype:protein_coding gene_symbol:Hnrnpul2 description:heterogeneous nuclear ribonucleoprotein U-like 2 [Source:RGD Symbol;Acc:1562784]	33	27	27	67	745	84.8	4.91	0.997112	1.0136	0.977094	0.984045	0.992186	0.939671	1.02969	0.995939	1.08357	Quantified
ENSRNOP00000036123	glucosidase II alpha subunit	Ganab	pep chromosome:Rnor_6.0:1:225096598:225116378:1 gene:ENSRNOG00000019724.6 transcript:ENSRNOT00000035650.2 gene_biotype:protein_coding transcript_biotype:protein_coding gene_symbol:Ganab description:glucosidase II alpha subunit [Source:RGD Symbol;Acc:1309775]	35	20	20	81	797	90.5	6.2	1.01736	1.00387	0.986955	1.03009	0.985192	0.961208	1.01964	0.988251	1.02048	Quantified
ENSRNOP00000014062	exportin 1	Xpo1	pep chromosome:Rnor_6.0:14:108007724:108049660:1 gene:ENSRNOG00000009935.5 transcript:ENSRNOT00000014062.4 gene_biotype:protein_coding transcript_biotype:protein_coding gene_symbol:Xpo1 description:exportin 1 [Source:RGD Symbol;Acc:620517]	24	25	25	86	1071	123	6.07	1.02937	1.03831	0.969795	1.01261	0.978156	0.950538	0.992816	1.01425	1.02754	Quantified
ENSRNOP00000041134	ubiquitin specific peptidase 7	Usp7	pep chromosome:Rnor_6.0:10:6975244:7018930:1 gene:ENSRNOG00000025496.6 transcript:ENSRNOT00000046232.5 gene_biotype:protein_coding transcript_biotype:protein_coding gene_symbol:Usp7 description:ubiquitin specific peptidase 7 [Source:RGD Symbol;Acc:1306915]	27	30	30	47	1103	128.3	5.55	1.03158	1.01937	0.992721	1.00947	0.988414	0.951281	1.01006	0.999472	1.01003	Quantified
ENSRNOP00000073812	kininogen 1	Kng1	pep chromosome:Rnor_6.0:11:81421676:81444621:-1 gene:ENSRNOG00000030387.5 transcript:ENSRNOT00000084867.1 gene_biotype:protein_coding transcript_biotype:protein_coding gene_symbol:Kng1 description:kininogen 1 [Source:RGD Symbol;Acc:1359376]	46	18	18	91	430	47.7	6.35	0.773793	0.829241	0.884516	1.1974	1.04655	0.925948	1.00045	1.09978	1.26346	Quantified
ENSRNOP00000010573	acetyl-CoA acetyltransferase 1	Acat1	pep chromosome:Rnor_6.0:8:58166990:58195884:-1 gene:ENSRNOG00000007862.6 transcript:ENSRNOT00000010573.5 gene_biotype:protein_coding transcript_biotype:protein_coding gene_symbol:Acat1 description:acetyl-CoA acetyltransferase 1 [Source:RGD Symbol;Acc:2016]	47	21	21	99	424	44.7	8.76	0.845418	0.998387	0.908547	0.939126	1.09477	0.990387	1.01507	1.06998	1.15587	Quantified
ENSRNOP00000059076	dynactin subunit 1	Dctn1	pep chromosome:Rnor_6.0:4:114876770:114896566:1 gene:ENSRNOG00000010048.6 transcript:ENSRNOT00000068102.3 gene_biotype:protein_coding transcript_biotype:protein_coding gene_symbol:Dctn1 description:dynactin subunit 1 [Source:RGD Symbol;Acc:62038]	25	28	28	46	1281	141.9	5.9	1.01342	0.989203	0.998423	1.01218	0.999975	0.994393	1.01684	0.999216	0.989828	Quantified
ENSRNOP00000018545	complement C9	C9	pep chromosome:Rnor_6.0:2:55775274:55823826:1 gene:ENSRNOG00000013736.6 transcript:ENSRNOT00000018545.5 gene_biotype:protein_coding transcript_biotype:protein_coding gene_symbol:C9 description:complement C9 [Source:RGD Symbol;Acc:620319]	36	22	22	73	580	65.2	6.1	0.876744	1.00454	0.976439	1.14089	0.989853	0.971863	0.944749	1.01534	1.09822	Quantified
ENSRNOP00000069622	complement factor B	Cfb	pep chromosome:Rnor_6.0:20:4536203:4542947:-1 gene:ENSRNOG00000000419.10 transcript:ENSRNOT00000086140.1 gene_biotype:protein_coding transcript_biotype:protein_coding gene_symbol:Cfb description:complement factor B [Source:RGD Symbol;Acc:2204]	34	26	26	58	763	85.3	6.96	0.911537	1.007	0.953652	1.07233	0.97663	0.976305	0.972723	1.03714	1.11068	Quantified
ENSRNOP00000037928	proteasome 26S subunit, non-ATPase 3	Psmd3	pep chromosome:Rnor_6.0:10:86599220:86611188:1 gene:ENSRNOG00000028103.5 transcript:ENSRNOT00000039836.4 gene_biotype:protein_coding transcript_biotype:protein_coding gene_symbol:Psmd3 description:proteasome 26S subunit, non-ATPase 3 [Source:RGD Symbol;Acc:1311470]	44	27	27	60	530	60.7	8.44	0.990807	0.968382	1.02917	0.997239	1.00663	1.02172	1.01003	0.997151	0.993064	Quantified
ENSRNOP00000031061	tripartite motif-containing 28	Trim28	pep chromosome:Rnor_6.0:1:65544373:65551043:-1 gene:ENSRNOG00000027487.2 transcript:ENSRNOT00000029996.2 gene_biotype:protein_coding transcript_biotype:protein_coding gene_symbol:Trim28 description:tripartite motif-containing 28 [Source:RGD Symbol;Acc:620289]	31	25	25	106	835	88.9	5.77	1.02155	1.00526	1.00582	1.02239	0.988626	0.929184	1.0117	0.981347	1.04611	Quantified
ENSRNOP00000068464	proline and arginine rich end leucine rich repeat protein	Prelp	pep chromosome:Rnor_6.0:13:50749542:50761306:-1 gene:ENSRNOG00000003120.5 transcript:ENSRNOT00000076610.2 gene_biotype:protein_coding transcript_biotype:protein_coding gene_symbol:Prelp description:proline and arginine rich end leucine rich repeat protein [Source:RGD Symbol;Acc:620226]	52	19	19	113	377	43.2	9.45	0.84775	1.06978	0.924802	1.00544	1.06981	0.966627	1.06746	1.04179	1.02193	Quantified
ENSRNOP00000025880	dihydropyrimidinase-like 3	Dpysl3	pep chromosome:Rnor_6.0:18:37716143:37819097:-1 gene:ENSRNOG00000018992.7 transcript:ENSRNOT00000025880.5 gene_biotype:protein_coding transcript_biotype:protein_coding gene_symbol:Dpysl3 description:dihydropyrimidinase-like 3 [Source:RGD Symbol;Acc:2410]	39	17	21	47	683	73.9	6.46	1.00674	1.10085	0.980628	1.0141	1.00264	0.955434	1.00712	0.998628	0.946329	Quantified
ENSRNOP00000019959	Ecm29 proteasome adaptor and scaffold	Ecpas	pep chromosome:Rnor_6.0:5:75931293:76039760:-1 gene:ENSRNOG00000025076.7 transcript:ENSRNOT00000019959.7 gene_biotype:protein_coding transcript_biotype:protein_coding gene_symbol:Ecpas description:Ecm29 proteasome adaptor and scaffold [Source:RGD Symbol;Acc:1306148]	16	29	29	46	1839	203.8	7.14	1.02188	0.998248	1.00819	1.01139	0.987673	1.04942	0.977007	0.994604	0.966869	Quantified
ENSRNOP00000044081	hemoglobin alpha, adult chain 2	Hba-a2	pep chromosome:Rnor_6.0:10:15589364:15590220:-1 gene:ENSRNOG00000047321.2 transcript:ENSRNOT00000048977.3 gene_biotype:protein_coding transcript_biotype:protein_coding gene_symbol:Hba-a2 description:hemoglobin alpha, adult chain 2 [Source:RGD Symbol;Acc:1359364]	73	2	12	975	142	15.3	8.31	0.884236	0.777556	0.925808	1.11198	0.969818	1.45188	0.898195	1.07965	0.93358	Quantified
ENSRNOP00000059464	septin 7	Septin7	pep chromosome:Rnor_6.0:8:26413233:26476611:1 gene:ENSRNOG00000006545.8 transcript:ENSRNOT00000063967.3 gene_biotype:protein_coding transcript_biotype:protein_coding gene_symbol:Septin7 description:septin 7 [Source:RGD Symbol;Acc:620469]	49	22	23	49	438	50.8	8.57	1.00721	1.02747	0.955688	0.945693	0.997606	0.996047	1.01938	1.04009	1.0251	Quantified
ENSRNOP00000041165	inter-alpha trypsin inhibitor, heavy chain 1	Itih1	pep chromosome:Rnor_6.0:16:7012354:7026540:-1 gene:ENSRNOG00000033386.5 transcript:ENSRNOT00000051751.3 gene_biotype:protein_coding transcript_biotype:protein_coding gene_symbol:Itih1 description:inter-alpha trypsin inhibitor, heavy chain 1 [Source:RGD Symbol;Acc:1306099]	22	20	20	50	904	100.5	6.86	0.966953	1.0407	0.996293	0.990196	0.966454	1.00713	0.992485	0.985676	1.07	Quantified
ENSRNOP00000008477	voltage-dependent anion channel 1	Vdac1	pep chromosome:Rnor_6.0:10:37724915:37752826:1 gene:ENSRNOG00000006375.6 transcript:ENSRNOT00000008477.5 gene_biotype:protein_coding transcript_biotype:protein_coding gene_symbol:Vdac1 description:voltage-dependent anion channel 1 [Source:RGD Symbol;Acc:621575]	65	15	15	82	283	30.7	8.54	0.978785	0.973478	0.934062	0.968945	0.979232	1.00182	1.00998	1.03001	1.14029	Quantified
ENSRNOP00000058722	tetratricopeptide repeat domain 37	Ttc37	pep chromosome:Rnor_6.0:2:2903492:3004553:1 gene:ENSRNOG00000040297.5 transcript:ENSRNOT00000062017.5 gene_biotype:protein_coding transcript_biotype:protein_coding gene_symbol:Ttc37 description:tetratricopeptide repeat domain 37 [Source:RGD Symbol;Acc:1306062]	21	31	31	48	1563	174.2	6.9	0.996331	0.996579	0.994947	0.98536	1.00444	0.985901	1.00069	1.02172	1.02809	Quantified
ENSRNOP00000023935	ribosomal protein S3	Rps3	pep chromosome:Rnor_6.0:1:164435878:164441167:-1 gene:ENSRNOG00000017418.5 transcript:ENSRNOT00000023935.5 gene_biotype:protein_coding transcript_biotype:protein_coding gene_symbol:Rps3 description:ribosomal protein S3 [Source:RGD Symbol;Acc:619888]	80	16	19	129	243	26.7	9.66	1.01923	0.975758	0.970897	1.00376	0.976435	1.02801	0.994336	0.994795	1.05248	Quantified
ENSRNOP00000015851	NADH:ubiquinone oxidoreductase core subunit S1	Ndufs1	pep chromosome:Rnor_6.0:9:69919867:69953182:-1 gene:ENSRNOG00000011849.6 transcript:ENSRNOT00000015852.5 gene_biotype:protein_coding transcript_biotype:protein_coding gene_symbol:Ndufs1 description:NADH:ubiquinone oxidoreductase core subunit S1 [Source:RGD Symbol;Acc:1359670]	36	22	22	48	727	79.4	5.9	0.981967	0.99366	0.981997	1.01904	1.02979	0.918758	1.02871	1.00213	1.05605	Quantified
ENSRNOP00000019126	splicing factor 3b, subunit 1	Sf3b1	pep chromosome:Rnor_6.0:9:61594620:61634510:-1 gene:ENSRNOG00000013516.6 transcript:ENSRNOT00000019126.5 gene_biotype:protein_coding transcript_biotype:protein_coding gene_symbol:Sf3b1 description:splicing factor 3b, subunit 1 [Source:RGD Symbol;Acc:620148]	29	29	29	65	1304	145.7	7.09	1.00041	1.00083	0.988832	1.00409	1.00596	0.995493	0.99645	0.994553	1.02765	Quantified
ENSRNOP00000074930	Serine protease inhibitor	LOC299282	pep chromosome:Rnor_6.0:6:127946686:128080217:1 gene:ENSRNOG00000010478.7 transcript:ENSRNOT00000082680.1 gene_biotype:protein_coding transcript_biotype:protein_coding gene_symbol:LOC299282 description:Serine protease inhibitor [Source:RGD Symbol;Acc:3745]	42	9	16	69	432	48.3	5.57	0.81667	0.860331	0.924882	1.17128	1.05327	0.872374	0.930615	0.960974	1.42883	Quantified
ENSRNOP00000043615	inositol 1,4,5-trisphosphate receptor, type 1	Itpr1	pep chromosome:Rnor_6.0:4:140247313:140579675:1 gene:ENSRNOG00000007104.7 transcript:ENSRNOT00000040255.5 gene_biotype:protein_coding transcript_biotype:protein_coding gene_symbol:Itpr1 description:inositol 1,4,5-trisphosphate receptor, type 1 [Source:RGD Symbol;Acc:2933]	13	27	37	53	2773	315.6	6.1	0.985177	1.0004	0.994718	0.97736	1.01678	0.935376	1.04293	0.995895	1.06341	Quantified
ENSRNOP00000024306	proteasome 26S subunit, non-ATPase 1	Psmd1	pep chromosome:Rnor_6.0:9:93080615:93155027:1 gene:ENSRNOG00000017730.6 transcript:ENSRNOT00000024306.5 gene_biotype:protein_coding transcript_biotype:protein_coding gene_symbol:Psmd1 description:proteasome 26S subunit, non-ATPase 1 [Source:RGD Symbol;Acc:621669]	35	31	31	47	953	105.6	5.39	1.02229	1.00777	0.986179	1.01586	1.01241	0.986127	0.993376	0.984769	1.00462	Quantified
ENSRNOP00000069828	fermitin family member 2	Fermt2	pep chromosome:Rnor_6.0:15:19807815:19876408:-1 gene:ENSRNOG00000009102.7 transcript:ENSRNOT00000086368.1 gene_biotype:protein_coding transcript_biotype:protein_coding gene_symbol:Fermt2 description:fermitin family member 2 [Source:RGD Symbol;Acc:1311799]	37	26	27	53	695	79.6	6.92	1.01446	1.06871	0.934974	0.989752	0.992075	0.978211	1.02864	0.998105	1.00874	Quantified
ENSRNOP00000013625	endoplasmic reticulum aminopeptidase 1	Erap1	pep chromosome:Rnor_6.0:2:1410934:1449733:1 gene:ENSRNOG00000009997.5 transcript:ENSRNOT00000013625.5 gene_biotype:protein_coding transcript_biotype:protein_coding gene_symbol:Erap1 description:endoplasmic reticulum aminopeptidase 1 [Source:RGD Symbol;Acc:708542]	31	25	25	51	930	106.4	6.51	1.01906	1.00055	1.02261	0.991481	1.0019	0.995998	1.00229	0.99172	0.987477	Quantified
ENSRNOP00000017468	lactate dehydrogenase A	Ldha	pep chromosome:Rnor_6.0:1:102900286:102909707:1 gene:ENSRNOG00000013009.2 transcript:ENSRNOT00000017468.2 gene_biotype:protein_coding transcript_biotype:protein_coding gene_symbol:Ldha description:lactate dehydrogenase A [Source:RGD Symbol;Acc:2996]	46	17	20	140	332	36.4	8.27	1.03322	1.00695	1.05738	1.07426	0.954446	1.01153	0.959734	0.998261	0.91844	Quantified
ENSRNOP00000015152	heterogeneous nuclear ribonucleoprotein A2/B1	Hnrnpa2b1	pep chromosome:Rnor_6.0:4:81237496:81241282:-1 gene:ENSRNOG00000011175.8 transcript:ENSRNOT00000015152.6 gene_biotype:protein_coding transcript_biotype:protein_coding gene_symbol:Hnrnpa2b1 description:heterogeneous nuclear ribonucleoprotein A2/B1 [Source:RGD Symbol;Acc:1310403]	53	18	19	111	352	37.3	9.07	0.974873	0.989092	0.981044	1.01641	1.03211	0.923611	1.01887	0.998541	1.07806	Quantified
ENSRNOP00000015019	protein phosphatase 2 scaffold subunit A alpha	Ppp2r1a	pep chromosome:Rnor_6.0:1:60717386:60736609:1 gene:ENSRNOG00000011282.6 transcript:ENSRNOT00000015019.6 gene_biotype:protein_coding transcript_biotype:protein_coding gene_symbol:Ppp2r1a description:protein phosphatase 2 scaffold subunit A alpha [Source:RGD Symbol;Acc:620907]	39	17	23	105	589	65.3	5.11	1.02096	1.00703	0.993318	1.00981	0.991739	0.976282	0.994125	0.991906	1.02838	Quantified
ENSRNOP00000070473	myosin XVIIIa	Myo18a	pep chromosome:Rnor_6.0:10:64979770:65080535:-1 gene:ENSRNOG00000033101.5 transcript:ENSRNOT00000088919.1 gene_biotype:protein_coding transcript_biotype:protein_coding gene_symbol:Myo18a description:myosin XVIIIa [Source:RGD Symbol;Acc:1562698]	18	35	35	46	2054	233.2	6.24	1.00993	1.03139	0.964115	0.978242	1.011	0.964093	1.02187	1.01049	1.02183	Quantified
ENSRNOP00000071980	Serine protease inhibitor	LOC299282	pep chromosome:Rnor_6.0:6:128048099:128080889:1 gene:ENSRNOG00000010478.7 transcript:ENSRNOT00000084685.1 gene_biotype:protein_coding transcript_biotype:protein_coding gene_symbol:LOC299282 description:Serine protease inhibitor [Source:RGD Symbol;Acc:3745]	48	0	14	56	416	46.3	5.08										Identified
ENSRNOP00000057305	family with sequence similarity 120A	Fam120a	pep chromosome:Rnor_6.0:17:16106137:16194478:1 gene:ENSRNOG00000016779.7 transcript:ENSRNOT00000060568.4 gene_biotype:protein_coding transcript_biotype:protein_coding gene_symbol:Fam120a description:family with sequence similarity 120A [Source:RGD Symbol;Acc:1306643]	29	25	26	41	1115	122.1	8.84	0.991446	0.984502	0.996432	0.982168	1.02246	1.003	1.01012	1.00702	1.01683	Quantified
ENSRNOP00000039050	glutathione S-transferase mu 1	Gstm1	pep chromosome:Rnor_6.0:2:210803869:210809306:-1 gene:ENSRNOG00000029726.4 transcript:ENSRNOT00000047139.3 gene_biotype:protein_coding transcript_biotype:protein_coding gene_symbol:Gstm1 description:glutathione S-transferase mu 1 [Source:RGD Symbol;Acc:2755]	66	10	16	92	216	25.7	7.85	0.857893	0.959247	1.12997	1.05838	1.02319	0.917186	0.995518	1.01447	1.05762	Quantified
ENSRNOP00000054218	adaptor related protein complex 1 subunit beta 1	Ap1b1	pep chromosome:Rnor_6.0:14:85250042:85281630:1 gene:ENSRNOG00000008786.7 transcript:ENSRNOT00000057407.4 gene_biotype:protein_coding transcript_biotype:protein_coding gene_symbol:Ap1b1 description:adaptor related protein complex 1 subunit beta 1 [Source:RGD Symbol;Acc:2064]	28	9	28	57	949	104.5	5.1	1.02951	1.00518	0.974222	0.972003	0.988156	1.0277	0.995562	0.976302	1.04622	Quantified
ENSRNOP00000060643	milk fat globule-EGF factor 8 protein	Mfge8	pep chromosome:Rnor_6.0:1:140845479:140860882:-1 gene:ENSRNOG00000017510.8 transcript:ENSRNOT00000067889.3 gene_biotype:protein_coding transcript_biotype:protein_coding gene_symbol:Mfge8 description:milk fat globule-EGF factor 8 protein [Source:RGD Symbol;Acc:3083]	43	20	20	70	483	53.1	6.65	0.838461	0.987791	0.981085	0.848209	1.25273	0.994488	1.00447	1.15361	0.95245	Quantified
ENSRNOP00000003277	USO1 vesicle transport factor	Uso1	pep chromosome:Rnor_6.0:14:17371453:17436897:-1 gene:ENSRNOG00000002301.6 transcript:ENSRNOT00000003277.4 gene_biotype:protein_coding transcript_biotype:protein_coding gene_symbol:Uso1 description:USO1 vesicle transport factor [Source:RGD Symbol;Acc:621604]	26	26	26	46	959	107.1	4.96	1.02708	1.00958	0.998278	0.957831	0.996619	1.05557	0.996712	0.990747	0.98237	Quantified
ENSRNOP00000072794	DNA topoisomerase I	Top1	pep chromosome:Rnor_6.0:3:156662120:156717686:1 gene:ENSRNOG00000047611.2 transcript:ENSRNOT00000086260.1 gene_biotype:protein_coding transcript_biotype:protein_coding gene_symbol:Top1 description:DNA topoisomerase I [Source:RGD Symbol;Acc:621246]	34	29	29	71	748	88.5	9.38	1.03819	0.961197	1.02363	1.01257	0.974278	0.999237	1.0036	0.98299	1.0178	Quantified
ENSRNOP00000008503	apoptosis inducing factor, mitochondria associated 1	Aifm1	pep chromosome:Rnor_6.0:X:135304079:135343087:-1 gene:ENSRNOG00000006067.6 transcript:ENSRNOT00000008503.5 gene_biotype:protein_coding transcript_biotype:protein_coding gene_symbol:Aifm1 description:apoptosis inducing factor, mitochondria associated 1 [Source:RGD Symbol;Acc:620817]	37	22	22	67	612	66.7	8.97	0.94009	0.996052	0.974522	0.972813	1.04295	0.959268	1.022	1.02145	1.08492	Quantified
ENSRNOP00000050623	agrin	Agrn	pep chromosome:Rnor_6.0:5:173589819:173622645:-1 gene:ENSRNOG00000020205.8 transcript:ENSRNOT00000045678.5 gene_biotype:protein_coding transcript_biotype:protein_coding gene_symbol:Agrn description:agrin [Source:RGD Symbol;Acc:2067]	16	28	28	57	1941	206.7	6.04	0.978369	0.995635	0.974438	0.971579	1.01226	0.97464	1.00919	1.02	1.07823	Quantified
ENSRNOP00000076121	ATPase H+ transporting V1 subunit A	Atp6v1a	pep chromosome:Rnor_6.0:11:61531571:61584634:1 gene:ENSRNOG00000001992.6 transcript:ENSRNOT00000093467.1 gene_biotype:protein_coding transcript_biotype:protein_coding gene_symbol:Atp6v1a description:ATPase H+ transporting V1 subunit A [Source:RGD Symbol;Acc:1596464]	43	24	24	50	617	68.2	5.58	0.988061	0.979825	0.97107	0.932488	1.08228	1.02733	1.02107	0.981346	1.03011	Quantified
ENSRNOP00000049143	macroH2A.1 histone	Macroh2a1	pep chromosome:Rnor_6.0:17:9282675:9344678:1 gene:ENSRNOG00000011523.8 transcript:ENSRNOT00000051702.6 gene_biotype:protein_coding transcript_biotype:protein_coding gene_symbol:Macroh2a1 description:macroH2A.1 histone [Source:RGD Symbol;Acc:621462]	52	16	18	53	371	39.5	9.79	0.991594	0.981596	1.01201	0.997838	1.01018	0.901211	1.0804	0.972096	1.06334	Quantified
ENSRNOP00000069681	integrin subunit alpha V	Itgav	pep chromosome:Rnor_6.0:3:71114100:71202411:1 gene:ENSRNOG00000004912.7 transcript:ENSRNOT00000088549.1 gene_biotype:protein_coding transcript_biotype:protein_coding gene_symbol:Itgav description:integrin subunit alpha V [Source:RGD Symbol;Acc:1310613]	22	22	22	46	1052	115.7	5.74	0.985139	0.995935	0.946843	0.994783	1.02428	1.00043	1.03234	0.993648	1.04105	Quantified
ENSRNOP00000049006	ring finger protein 213	Rnf213	pep chromosome:Rnor_6.0:10:108527740:108624688:1 gene:ENSRNOG00000029658.5 transcript:ENSRNOT00000044983.5 gene_biotype:protein_coding transcript_biotype:protein_coding gene_symbol:Rnf213 description:ring finger protein 213 [Source:RGD Symbol;Acc:1308168]	7	35	35	46	5136	583	6.89	1.03712	1.02469	1.03038	0.966778	0.967619	1.01633	1.00765	0.969604	0.993146	Quantified
ENSRNOP00000005127	aspartyl-tRNA synthetase	Dars	pep chromosome:Rnor_6.0:13:45074072:45127815:-1 gene:ENSRNOG00000003743.7 transcript:ENSRNOT00000005127.6 gene_biotype:protein_coding transcript_biotype:protein_coding gene_symbol:Dars description:aspartyl-tRNA synthetase [Source:RGD Symbol;Acc:621167]	55	26	26	77	501	57.1	6.44	0.986641	1.01312	1.0035	0.994559	0.989927	1.00591	0.984246	1.01541	1.02178	Quantified
ENSRNOP00000019652	carnitine palmitoyltransferase 1A	Cpt1a	pep chromosome:Rnor_6.0:1:218569510:218629678:1 gene:ENSRNOG00000014254.3 transcript:ENSRNOT00000019652.3 gene_biotype:protein_coding transcript_biotype:protein_coding gene_symbol:Cpt1a description:carnitine palmitoyltransferase 1A [Source:RGD Symbol;Acc:2396]	33	22	22	67	773	88.1	8.54	0.984386	0.939518	0.981882	0.961206	0.976999	1.03536	1.03025	0.987447	1.119	Quantified
ENSRNOP00000002482	dynamin 1-like	Dnm1l	pep chromosome:Rnor_6.0:11:88830957:88880198:1 gene:ENSRNOG00000001813.8 transcript:ENSRNOT00000002482.7 gene_biotype:protein_coding transcript_biotype:protein_coding gene_symbol:Dnm1l description:dynamin 1-like [Source:RGD Symbol;Acc:620416]	44	32	32	63	718	80.1	7.08	1.01565	0.989049	0.985123	1.00613	0.974498	1.03317	0.985231	1.01641	1.01051	Quantified
ENSRNOP00000025534	complement C5	C5	pep chromosome:Rnor_6.0:3:14050357:14229067:-1 gene:ENSRNOG00000018899.8 transcript:ENSRNOT00000025534.7 gene_biotype:protein_coding transcript_biotype:protein_coding gene_symbol:C5 description:complement C5 [Source:RGD Symbol;Acc:2237]	19	34	34	56	1681	189	6.62	0.905791	0.967074	0.954667	1.06221	1.0122	0.989923	0.969381	1.04077	1.11602	Quantified
ENSRNOP00000063778	collagen type XIV alpha 1 chain	Col14a1	pep chromosome:Rnor_6.0:7:95074236:95273298:1 gene:ENSRNOG00000026415.6 transcript:ENSRNOT00000067649.3 gene_biotype:protein_coding transcript_biotype:protein_coding gene_symbol:Col14a1 description:collagen type XIV alpha 1 chain [Source:RGD Symbol;Acc:1305806]	17	30	30	49	1794	192.4	5.22	0.784475	1.24109	0.874255	1.06631	1.14331	1.01202	0.931737	1.08394	0.881893	Quantified
ENSRNOP00000022943	calbindin 2	Calb2	pep chromosome:Rnor_6.0:19:41482728:41509658:1 gene:ENSRNOG00000016977.4 transcript:ENSRNOT00000022943.4 gene_biotype:protein_coding transcript_biotype:protein_coding gene_symbol:Calb2 description:calbindin 2 [Source:RGD Symbol;Acc:620981]	54	18	18	113	271	31.4	5.02	1.06503	1.10796	1.11296	1.18609	1.00669	0.787722	0.968015	0.860361	0.910536	Quantified
ENSRNOP00000072174	KH-type splicing regulatory protein	Khsrp	pep chromosome:Rnor_6.0:9:10013854:10022330:1 gene:ENSRNOG00000047628.2 transcript:ENSRNOT00000077653.1 gene_biotype:protein_coding transcript_biotype:protein_coding gene_symbol:Khsrp description:KH-type splicing regulatory protein [Source:RGD Symbol;Acc:621828]	36	21	24	50	748	76.7	7.33	0.992355	1.00239	1.02752	1.01242	0.99568	0.919663	1.01115	1.0043	1.04654	Quantified
ENSRNOP00000012376	karyopherin subunit beta 1	Kpnb1	pep chromosome:Rnor_6.0:10:85093841:85124644:-1 gene:ENSRNOG00000009275.4 transcript:ENSRNOT00000012376.4 gene_biotype:protein_coding transcript_biotype:protein_coding gene_symbol:Kpnb1 description:karyopherin subunit beta 1 [Source:RGD Symbol;Acc:2909]	28	21	21	63	876	97.1	4.78	1.01629	1.01905	0.985172	1.00247	1.01095	0.982111	1.00199	0.995048	1.00019	Quantified
ENSRNOP00000023900	methylcrotonoyl-CoA carboxylase 2	Mccc2	pep chromosome:Rnor_6.0:2:30175018:30246010:-1 gene:ENSRNOG00000017752.6 transcript:ENSRNOT00000023900.5 gene_biotype:protein_coding transcript_biotype:protein_coding gene_symbol:Mccc2 description:methylcrotonoyl-CoA carboxylase 2 [Source:RGD Symbol;Acc:1310279]	44	21	21	48	563	61.5	8.31	0.96411	0.981843	0.956625	0.976205	1.0254	1.01593	1.00346	1.02628	1.06603	Quantified
ENSRNOP00000072118	isoleucyl-tRNA synthetase 2, mitochondrial	Iars2	pep chromosome:Rnor_6.0:13:103231387:103264906:-1 gene:ENSRNOG00000002368.7 transcript:ENSRNOT00000090786.1 gene_biotype:protein_coding transcript_biotype:protein_coding gene_symbol:Iars2 description:isoleucyl-tRNA synthetase 2, mitochondrial [Source:RGD Symbol;Acc:1311857]	30	25	25	46	1011	112.6	6.74	0.983321	0.979108	0.936638	0.974636	1.04079	1.00316	1.01781	1.00535	1.07406	Quantified
ENSRNOP00000072190	ubiquitin specific peptidase 9, X-linked	Usp9x	pep chromosome:Rnor_6.0:X:10510033:10630281:-1 gene:ENSRNOG00000003261.7 transcript:ENSRNOT00000080651.1 gene_biotype:protein_coding transcript_biotype:protein_coding gene_symbol:Usp9x description:ubiquitin specific peptidase 9, X-linked [Source:RGD Symbol;Acc:1560056]	12	19	33	62	2554	290	5.82	0.994027	0.99136	1.02461	1.00954	1.00828	1.01675	1.00325	0.986127	0.980067	Quantified
ENSRNOP00000024436	annexin A4	Anxa4	pep chromosome:Rnor_6.0:4:118538777:118595580:-1 gene:ENSRNOG00000018159.7 transcript:ENSRNOT00000024436.7 gene_biotype:protein_coding transcript_biotype:protein_coding gene_symbol:Anxa4 description:annexin A4 [Source:RGD Symbol;Acc:621171]	61	21	21	55	319	35.9	5.57	1.0078	0.984093	1.00801	0.985442	0.974315	1.02785	1.01681	0.976062	1.03435	Quantified
ENSRNOP00000060874	scavenger receptor class B, member 1	Scarb1	pep chromosome:Rnor_6.0:12:36694960:36761455:1 gene:ENSRNOG00000000981.8 transcript:ENSRNOT00000064276.3 gene_biotype:protein_coding transcript_biotype:protein_coding gene_symbol:Scarb1 description:scavenger receptor class B, member 1 [Source:RGD Symbol;Acc:2302]	28	13	13	180	509	56.9	7.64	1.13795	0.936303	0.938266	0.975118	0.915945	1.15816	0.991021	0.907058	1.05783	Quantified
ENSRNOP00000070326	catenin delta 1	Ctnnd1	pep chromosome:Rnor_6.0:3:72002152:72053049:-1 gene:ENSRNOG00000030790.5 transcript:ENSRNOT00000081400.1 gene_biotype:protein_coding transcript_biotype:protein_coding gene_symbol:Ctnnd1 description:catenin delta 1 [Source:RGD Symbol;Acc:1305643]	30	28	28	67	932	104	6.95	1.01281	0.993176	1.04393	1.01456	0.998985	0.990809	0.99785	0.98598	0.974801	Quantified
ENSRNOP00000008980	dihydrolipoamide dehydrogenase	Dld	pep chromosome:Rnor_6.0:6:50597677:50618694:-1 gene:ENSRNOG00000006364.7 transcript:ENSRNOT00000008980.6 gene_biotype:protein_coding transcript_biotype:protein_coding gene_symbol:Dld description:dihydrolipoamide dehydrogenase [Source:RGD Symbol;Acc:735073]	41	17	17	55	509	54	7.87	0.933805	0.956998	0.938873	0.89853	1.06207	1.06554	1.07003	1.03454	1.05563	Quantified
ENSRNOP00000016329	ribosomal protein S3a	Rps3a	pep chromosome:Rnor_6.0:2:185440291:185444897:-1 gene:ENSRNOG00000011893.6 transcript:ENSRNOT00000016329.6 gene_biotype:protein_coding transcript_biotype:protein_coding gene_symbol:Rps3a description:ribosomal protein S3a [Source:RGD Symbol;Acc:62078]	69	20	20	124	264	29.9	9.73	1.04352	0.977245	1.00495	0.991699	0.964339	1.00592	1.00458	0.989308	1.0324	Quantified
ENSRNOP00000023132	peroxiredoxin 1	Prdx1	pep chromosome:Rnor_6.0:5:135536413:135551990:1 gene:ENSRNOG00000017194.5 transcript:ENSRNOT00000023132.5 gene_biotype:protein_coding transcript_biotype:protein_coding gene_symbol:Prdx1 description:peroxiredoxin 1 [Source:RGD Symbol;Acc:620039]	73	13	14	158	199	22.1	8.13	0.988253	1.01917	1.01589	1.03202	1.02646	0.975688	0.973751	0.990601	0.991678	Quantified
ENSRNOP00000063199	PDS5 cohesin associated factor B	Pds5b	pep chromosome:Rnor_6.0:12:703290:791222:1 gene:ENSRNOG00000001098.8 transcript:ENSRNOT00000064951.3 gene_biotype:protein_coding transcript_biotype:protein_coding gene_symbol:Pds5b description:PDS5 cohesin associated factor B [Source:RGD Symbol;Acc:1310838]	20	24	28	51	1450	164.4	8.62	1.01259	0.995716	1.01323	1.00999	0.994702	0.999867	0.986458	0.993669	1.00783	Quantified
ENSRNOP00000061437	guanylate binding protein 2	Gbp2	pep chromosome:Rnor_6.0:2:248276709:248293784:1 gene:ENSRNOG00000031743.5 transcript:ENSRNOT00000068683.3 gene_biotype:protein_coding transcript_biotype:protein_coding gene_symbol:Gbp2 description:guanylate binding protein 2 [Source:RGD Symbol;Acc:621810]	36	21	21	40	591	67.3	5.62	1.07414	1.04961	1.02725	0.973737	0.951751	1.02149	0.991617	0.97078	0.952676	Quantified
ENSRNOP00000070937	serpin family A member 1	Serpina1	pep chromosome:Rnor_6.0:6:127610243:127630734:-1 gene:ENSRNOG00000032669.5 transcript:ENSRNOT00000089931.1 gene_biotype:protein_coding transcript_biotype:protein_coding gene_symbol:Serpina1 description:serpin family A member 1 [Source:RGD Symbol;Acc:3326]	33	14	14	95	415	46.6	6.34	0.963475	1.12342	1.05276	1.02897	0.897049	0.956645	0.909256	1.0358	1.04916	Quantified
ENSRNOP00000009749	perilipin 2	Plin2	pep chromosome:Rnor_6.0:5:104984414:105010857:-1 gene:ENSRNOG00000007060.5 transcript:ENSRNOT00000009749.5 gene_biotype:protein_coding transcript_biotype:protein_coding gene_symbol:Plin2 description:perilipin 2 [Source:RGD Symbol;Acc:728889]	47	20	20	45	421	46.2	5.85	1.04911	1.03803	0.933229	0.98124	1.0224	0.974864	0.959297	0.983165	1.07255	Quantified
ENSRNOP00000024020	VPS35 retromer complex component	Vps35	pep chromosome:Rnor_6.0:19:27464937:27500636:1 gene:ENSRNOG00000017612.5 transcript:ENSRNOT00000024020.5 gene_biotype:protein_coding transcript_biotype:protein_coding gene_symbol:Vps35 description:VPS35 retromer complex component [Source:RGD Symbol;Acc:1589784]	31	23	23	65	796	91.7	5.44	1.0181	1.00962	0.966585	0.987707	1.00193	0.980548	1.01288	1.01616	1.0201	Quantified
ENSRNOP00000000383	nidogen 2	Nid2	pep chromosome:Rnor_6.0:15:4894213:4951917:-1 gene:ENSRNOG00000000341.7 transcript:ENSRNOT00000000383.7 gene_biotype:protein_coding transcript_biotype:protein_coding gene_symbol:Nid2 description:nidogen 2 [Source:RGD Symbol;Acc:1311685]	22	27	28	55	1438	157.9	5.68	0.973633	1.00428	0.98315	0.985006	1.0696	1.03119	0.99161	1.00174	0.974299	Quantified
ENSRNOP00000006578	proliferation-associated 2G4	Pa2g4	pep chromosome:Rnor_6.0:7:2979588:2987055:-1 gene:ENSRNOG00000004904.5 transcript:ENSRNOT00000006578.5 gene_biotype:protein_coding transcript_biotype:protein_coding gene_symbol:Pa2g4 description:proliferation-associated 2G4 [Source:RGD Symbol;Acc:1302994]	55	17	17	61	394	43.6	6.86	1.01792	0.996056	1.00407	1.02327	0.98682	1.0023	1.00164	0.987897	0.993985	Quantified
ENSRNOP00000014785	integrin subunit beta 1	Itgb1	pep chromosome:Rnor_6.0:19:61677542:61725535:1 gene:ENSRNOG00000010966.6 transcript:ENSRNOT00000014785.5 gene_biotype:protein_coding transcript_biotype:protein_coding gene_symbol:Itgb1 description:integrin subunit beta 1 [Source:RGD Symbol;Acc:2927]	24	18	18	79	798	88.3	6.01	1.00823	1.02556	0.98083	0.989553	1.01878	0.987399	1.01906	1.00301	0.980663	Quantified
ENSRNOP00000001098	flotillin 1	Flot1	pep chromosome:Rnor_6.0:20:3427892:3438389:-1 gene:ENSRNOG00000000826.7 transcript:ENSRNOT00000001098.4 gene_biotype:protein_coding transcript_biotype:protein_coding gene_symbol:Flot1 description:flotillin 1 [Source:RGD Symbol;Acc:70991]	58	21	21	50	428	47.5	7.15	0.958806	0.964391	0.955625	0.972561	1.04775	1.05747	1.02613	1.01042	1.02288	Quantified
ENSRNOP00000005126	DEAH-box helicase 15	Dhx15	pep chromosome:Rnor_6.0:14:61136746:61174880:1 gene:ENSRNOG00000003844.6 transcript:ENSRNOT00000005126.6 gene_biotype:protein_coding transcript_biotype:protein_coding gene_symbol:Dhx15 description:DEAH-box helicase 15 [Source:RGD Symbol;Acc:1308072]	33	24	24	49	795	90.9	7.46	1.01278	0.977059	0.997562	0.996878	1.01325	0.959201	1.01429	1.01956	1.02208	Quantified
ENSRNOP00000046509	calpain 2	Capn2	pep chromosome:Rnor_6.0:13:100878650:100928811:-1 gene:ENSRNOG00000034015.3 transcript:ENSRNOT00000045326.3 gene_biotype:protein_coding transcript_biotype:protein_coding gene_symbol:Capn2 description:calpain 2 [Source:RGD Symbol;Acc:2268]	29	19	20	42	700	79.9	4.96	1.02516	1.0387	0.977237	0.986941	1.00813	0.998267	1.01481	0.994249	0.969663	Quantified
ENSRNOP00000030772	DEAD-box helicase 46	Ddx46	pep chromosome:Rnor_6.0:17:9475538:9519595:-1 gene:ENSRNOG00000021637.6 transcript:ENSRNOT00000029885.5 gene_biotype:protein_coding transcript_biotype:protein_coding gene_symbol:Ddx46 description:DEAD-box helicase 46 [Source:RGD Symbol;Acc:708480]	27	26	26	41	1032	117.3	9.26	1.03186	1.01695	1.00405	1.01779	0.984559	0.94829	0.991921	1.00688	1.01031	Quantified
ENSRNOP00000005329	proteasome 26S subunit, ATPase 1	Psmc1	pep chromosome:Rnor_6.0:6:124123228:124135658:1 gene:ENSRNOG00000003951.6 transcript:ENSRNOT00000005329.6 gene_biotype:protein_coding transcript_biotype:protein_coding gene_symbol:Psmc1 description:proteasome 26S subunit, ATPase 1 [Source:RGD Symbol;Acc:621097]	57	24	25	58	440	49.2	6.21	1.03129	0.999265	1.01556	0.990871	0.989874	0.991078	1.00539	0.989469	1.00021	Quantified
ENSRNOP00000065108	tubulin, alpha 8	Tuba8	pep chromosome:Rnor_6.0:4:153774486:153791328:1 gene:ENSRNOG00000048169.2 transcript:ENSRNOT00000074096.2 gene_biotype:protein_coding transcript_biotype:protein_coding gene_symbol:Tuba8 description:tubulin, alpha 8 [Source:RGD Symbol;Acc:1566041]	32	1	12	172	449	50	5.1	0.987257	0.983772	0.991018	1.06137	0.965335	1.02134	0.988009	1.02461	0.993573	Quantified
ENSRNOP00000002484	eukaryotic translation initiation factor 4A2	Eif4a2	pep chromosome:Rnor_6.0:11:81373048:81379640:-1 gene:ENSRNOG00000001815.6 transcript:ENSRNOT00000002484.6 gene_biotype:protein_coding transcript_biotype:protein_coding gene_symbol:Eif4a2 description:eukaryotic translation initiation factor 4A2 [Source:RGD Symbol;Acc:1309225]	45	7	17	75	407	46.4	5.48	0.999351	1.00837	1.04071	1.01261	1.0374	0.997754	0.997483	0.962604	0.956209	Quantified
ENSRNOP00000034024	FKBP prolyl isomerase 5	Fkbp5	pep chromosome:Rnor_6.0:20:7976713:8019020:-1 gene:ENSRNOG00000022523.5 transcript:ENSRNOT00000033119.5 gene_biotype:protein_coding transcript_biotype:protein_coding gene_symbol:Fkbp5 description:FKBP prolyl isomerase 5 [Source:RGD Symbol;Acc:1309155]	45	21	21	59	456	50.9	6.16	1.04471	1.04546	0.957997	1.05038	0.979956	0.968375	1.00098	0.985191	0.980202	Quantified
ENSRNOP00000015247	ATPase 13A1	Atp13a1	pep chromosome:Rnor_6.0:16:21364101:21380331:-1 gene:ENSRNOG00000010776.7 transcript:ENSRNOT00000015247.5 gene_biotype:protein_coding transcript_biotype:protein_coding gene_symbol:Atp13a1 description:ATPase 13A1 [Source:RGD Symbol;Acc:1306033]	24	26	26	40	1197	131.8	8.07	1.01055	0.988341	0.993504	0.998881	0.985053	1.03018	0.999377	1.00597	1.00327	Quantified
ENSRNOP00000026968	dipeptidylpeptidase 3	Dpp3	pep chromosome:Rnor_6.0:1:220166127:220188541:-1 gene:ENSRNOG00000031485.4 transcript:ENSRNOT00000026968.6 gene_biotype:protein_coding transcript_biotype:protein_coding gene_symbol:Dpp3 description:dipeptidylpeptidase 3 [Source:RGD Symbol;Acc:621127]	36	22	22	56	738	83	5.22	0.989824	1.00638	1.02522	1.0124	0.995727	0.99104	0.991428	1.00189	1.0001	Quantified
ENSRNOP00000059651	aldehyde oxidase 1	Aox1	pep chromosome:Rnor_6.0:9:64929721:65007870:1 gene:ENSRNOG00000015354.8 transcript:ENSRNOT00000068633.4 gene_biotype:protein_coding transcript_biotype:protein_coding gene_symbol:Aox1 description:aldehyde oxidase 1 [Source:RGD Symbol;Acc:620528]	20	24	27	51	1333	146.8	6.96	0.935231	0.996593	0.999758	1.04714	1.02953	0.88074	1.04613	1.08438	0.99229	Quantified
ENSRNOP00000014235	acyl-CoA synthetase long-chain family member 1	Acsl1	pep chromosome:Rnor_6.0:16:48937456:48981980:-1 gene:ENSRNOG00000010633.3 transcript:ENSRNOT00000014235.3 gene_biotype:protein_coding transcript_biotype:protein_coding gene_symbol:Acsl1 description:acyl-CoA synthetase long-chain family member 1 [Source:RGD Symbol;Acc:2015]	33	20	22	56	699	78.1	6.99	0.827875	1.01361	0.929716	0.880579	1.3893	1.0323	1.00936	0.99315	0.936058	Quantified
ENSRNOP00000022532	prenylcysteine oxidase 1	Pcyox1	pep chromosome:Rnor_6.0:4:118187134:118198029:-1 gene:ENSRNOG00000016704.6 transcript:ENSRNOT00000022532.6 gene_biotype:protein_coding transcript_biotype:protein_coding gene_symbol:Pcyox1 description:prenylcysteine oxidase 1 [Source:RGD Symbol;Acc:628652]	44	16	16	75	504	56.3	7.09	0.94263	0.943857	0.94194	0.967403	1.04125	1.00176	1.02455	1.10612	1.04646	Quantified
ENSRNOP00000023567	tropomyosin 3	Tpm3	pep chromosome:Rnor_6.0:2:189430041:189451029:1 gene:ENSRNOG00000017441.8 transcript:ENSRNOT00000023567.8 gene_biotype:protein_coding transcript_biotype:protein_coding gene_symbol:Tpm3 description:tropomyosin 3 [Source:RGD Symbol;Acc:621546]	67	11	24	100	248	29	4.78	1.0056	0.996197	1.01561	0.981511	0.999615	1.02529	1.02962	0.967017	0.993185	Quantified
ENSRNOP00000062626	septin 11	Septin11	pep chromosome:Rnor_6.0:14:16369544:16452890:-1 gene:ENSRNOG00000002182.7 transcript:ENSRNOT00000067222.2 gene_biotype:protein_coding transcript_biotype:protein_coding gene_symbol:Septin11 description:septin 11 [Source:RGD Symbol;Acc:1307405]	50	9	18	107	432	49.8	6.68	1.01927	1.03085	0.980288	0.975982	1.0086	0.973434	1.02243	1.00161	1.00017	Quantified
ENSRNOP00000015913	solute carrier family 25 member 5	Slc25a5	pep chromosome:Rnor_6.0:X:123404518:123407645:1 gene:ENSRNOG00000039980.4 transcript:ENSRNOT00000015085.6 gene_biotype:protein_coding transcript_biotype:protein_coding gene_symbol:Slc25a5 description:solute carrier family 25 member 5 [Source:RGD Symbol;Acc:620353]	45	9	17	196	298	32.9	9.73	0.992687	0.955052	0.952292	0.937968	1.00245	1.0207	1.03718	1.0188	1.09818	Quantified
ENSRNOP00000044454	lysyl-tRNA synthetase	Kars	pep chromosome:Rnor_6.0:19:44212206:44231157:-1 gene:ENSRNOG00000019456.6 transcript:ENSRNOT00000046126.3 gene_biotype:protein_coding transcript_biotype:protein_coding gene_symbol:Kars description:lysyl-tRNA synthetase [Source:RGD Symbol;Acc:1359653]	30	22	22	46	626	71.6	6.6	0.987486	1.01426	1.01292	1.02865	0.992328	1.01273	1.00495	0.969144	0.99197	Quantified
ENSRNOP00000069644	HECT, UBA and WWE domain containing E3 ubiquitin protein ligase 1	Huwe1	pep chromosome:Rnor_6.0:X:21499934:21598876:1 gene:ENSRNOG00000061262.1 transcript:ENSRNOT00000081037.1 gene_biotype:protein_coding transcript_biotype:protein_coding gene_symbol:Huwe1 description:HECT, UBA and WWE domain containing E3 ubiquitin protein ligase 1 [Source:RGD Symbol;Acc:1561763]	9	34	34	44	4062	447.4	5.4	0.983254	0.99672	1.01028	1.00046	1.02762	1.00497	1.01	0.986733	0.993693	Quantified
ENSRNOP00000027305	eukaryotic translation elongation factor 1 gamma	Eef1g	pep chromosome:Rnor_6.0:1:225163391:225173995:1 gene:ENSRNOG00000020075.7 transcript:ENSRNOT00000027305.7 gene_biotype:protein_coding transcript_biotype:protein_coding gene_symbol:Eef1g description:eukaryotic translation elongation factor 1 gamma [Source:RGD Symbol;Acc:1302939]	38	20	20	97	437	50	6.74	1.07126	1.00886	0.991886	1.00304	0.938645	1.00465	0.992711	0.996181	1.00681	Quantified
ENSRNOP00000009431	ribosomal protein L7	Rpl7	pep chromosome:Rnor_6.0:5:2632712:2640021:1 gene:ENSRNOG00000006992.6 transcript:ENSRNOT00000009431.6 gene_biotype:protein_coding transcript_biotype:protein_coding gene_symbol:Rpl7 description:ribosomal protein L7 [Source:RGD Symbol;Acc:735169]	58	19	19	103	260	30.3	10.87	1.04504	0.984201	1.02167	0.999317	0.945602	1.00488	0.991687	0.988951	1.03286	Quantified
ENSRNOP00000016288	SPT16 homolog, facilitates chromatin remodeling subunit	Supt16h	pep chromosome:Rnor_6.0:15:28575480:28611946:-1 gene:ENSRNOG00000011953.5 transcript:ENSRNOT00000016288.5 gene_biotype:protein_coding transcript_biotype:protein_coding gene_symbol:Supt16h description:SPT16 homolog, facilitates chromatin remodeling subunit [Source:RGD Symbol;Acc:1310032]	25	27	27	40	1047	119.8	5.66	1.05022	1.02251	1.0059	1.02965	0.958382	0.953824	0.988453	1.00272	1.00114	Quantified
ENSRNOP00000065578		AABR07043748.1	pep chromosome:Rnor_6.0:19:38340738:38344845:-1 gene:ENSRNOG00000046621.2 transcript:ENSRNOT00000072666.2 gene_biotype:protein_coding transcript_biotype:protein_coding gene_symbol:AABR07043748.1	23	28	28	41	1215	137.5	5.59	1.01339	0.989912	0.997369	0.991779	0.980028	1.01488	0.999786	1.01412	1.01351	Quantified
ENSRNOP00000052049	elongation factor Tu GTP binding domain containing 2	Eftud2	pep chromosome:Rnor_6.0:10:90932075:90983928:-1 gene:ENSRNOG00000002818.7 transcript:ENSRNOT00000055176.3 gene_biotype:protein_coding transcript_biotype:protein_coding gene_symbol:Eftud2 description:elongation factor Tu GTP binding domain containing 2 [Source:RGD Symbol;Acc:1560116]	26	24	25	52	971	109.3	5	1.0146	0.996863	1.00316	1.00609	0.986975	0.947093	1.00708	1.00253	1.04843	Quantified
ENSRNOP00000049952	ATP binding cassette subfamily B member 4	Abcb4	pep chromosome:Rnor_6.0:4:22225461:22307453:-1 gene:ENSRNOG00000008012.7 transcript:ENSRNOT00000047126.5 gene_biotype:protein_coding transcript_biotype:protein_coding gene_symbol:Abcb4 description:ATP binding cassette subfamily B member 4 [Source:RGD Symbol;Acc:620248]	19	2	23	43	1275	141.2	8.56	0.988358	0.90835	0.97066	0.97741	0.982148	0.977243	0.966715	0.970776	1.27486	Quantified
ENSRNOP00000010210	chromosome segregation 1 like	Cse1l	pep chromosome:Rnor_6.0:3:163664136:163702060:1 gene:ENSRNOG00000007665.4 transcript:ENSRNOT00000010210.4 gene_biotype:protein_coding transcript_biotype:protein_coding gene_symbol:Cse1l description:chromosome segregation 1 like [Source:RGD Symbol;Acc:1307536]	29	26	26	69	971	110.1	5.77	1.0076	1.01703	1.01297	1.04399	0.981135	0.968112	0.9717	0.988249	1.02318	Quantified
ENSRNOP00000014940	annexin A11	Anxa11	pep chromosome:Rnor_6.0:16:3867208:3912148:-1 gene:ENSRNOG00000010984.6 transcript:ENSRNOT00000014941.6 gene_biotype:protein_coding transcript_biotype:protein_coding gene_symbol:Anxa11 description:annexin A11 [Source:RGD Symbol;Acc:1309911]	39	18	18	49	503	54.1	7.65	1.00196	0.985696	0.976057	0.990719	0.954988	0.974139	0.994471	1.0841	1.05326	Quantified
ENSRNOP00000016954	carnitine palmitoyltransferase 2	Cpt2	pep chromosome:Rnor_6.0:5:127505614:127523089:-1 gene:ENSRNOG00000012443.5 transcript:ENSRNOT00000016954.3 gene_biotype:protein_coding transcript_biotype:protein_coding gene_symbol:Cpt2 description:carnitine palmitoyltransferase 2 [Source:RGD Symbol;Acc:2398]	32	22	22	79	658	74	7.46	0.937297	0.995864	0.931202	0.929871	1.02683	1.00547	1.04385	1.02808	1.11741	Quantified
ENSRNOP00000052160	heterogeneous nuclear ribonucleoprotein A1	Hnrnpa1	pep chromosome:Rnor_6.0:7:144865623:144871585:1 gene:ENSRNOG00000036839.4 transcript:ENSRNOT00000055285.4 gene_biotype:protein_coding transcript_biotype:protein_coding gene_symbol:Hnrnpa1 description:heterogeneous nuclear ribonucleoprotein A1 [Source:RGD Symbol;Acc:69234]	48	13	17	83	320	34.2	9.23	1.02068	0.964465	1.06022	1.07096	0.991657	0.924706	1.01381	0.936927	1.02755	Quantified
ENSRNOP00000025906	integrin-linked kinase	Ilk	pep chromosome:Rnor_6.0:1:170578889:170585189:1 gene:ENSRNOG00000018993.4 transcript:ENSRNOT00000025906.4 gene_biotype:protein_coding transcript_biotype:protein_coding gene_symbol:Ilk description:integrin-linked kinase [Source:RGD Symbol;Acc:620063]	45	22	22	83	452	51.3	8.07	0.99574	1.05315	0.948031	0.982996	1.00723	0.987384	1.03944	1.0026	0.997086	Quantified
ENSRNOP00000068620	catenin beta 1	Ctnnb1	pep chromosome:Rnor_6.0:8:129617812:129627372:1 gene:ENSRNOG00000054172.1 transcript:ENSRNOT00000079085.1 gene_biotype:protein_coding transcript_biotype:protein_coding gene_symbol:Ctnnb1 description:catenin beta 1 [Source:RGD Symbol;Acc:70487]	34	20	24	53	781	85.4	5.86	0.998574	0.999857	1.02282	0.997234	1.01625	0.977291	1.0152	0.990016	0.995381	Quantified
ENSRNOP00000019059	isocitrate dehydrogenase (NADP(+)) 2	Idh2	pep chromosome:Rnor_6.0:1:141874358:141893674:-1 gene:ENSRNOG00000013949.7 transcript:ENSRNOT00000019059.5 gene_biotype:protein_coding transcript_biotype:protein_coding gene_symbol:Idh2 description:isocitrate dehydrogenase (NADP(+)) 2 [Source:RGD Symbol;Acc:1597139]	48	21	22	79	452	50.9	8.69	1.01185	1.04929	1.02431	1.03194	0.999968	0.916727	0.99229	0.968857	1.01621	Quantified
ENSRNOP00000012415	protein kinase cAMP-dependent type II regulatory subunit beta	Prkar2b	pep chromosome:Rnor_6.0:6:51265515:51356383:-1 gene:ENSRNOG00000009079.6 transcript:ENSRNOT00000012415.6 gene_biotype:protein_coding transcript_biotype:protein_coding gene_symbol:Prkar2b description:protein kinase cAMP-dependent type II regulatory subunit beta [Source:RGD Symbol;Acc:3394]	44	13	15	66	416	46.1	4.98	0.974299	0.983513	1.05025	1.05898	0.977345	0.920869	0.967073	1.0134	1.06784	Quantified
ENSRNOP00000010621	phospholipase A2, activating protein	Plaa	pep chromosome:Rnor_6.0:5:113548913:113578928:-1 gene:ENSRNOG00000007753.6 transcript:ENSRNOT00000010621.5 gene_biotype:protein_coding transcript_biotype:protein_coding gene_symbol:Plaa description:phospholipase A2, activating protein [Source:RGD Symbol;Acc:621245]	35	25	25	40	795	87	6.09	1.02055	1.00171	0.996702	1.01103	0.990924	0.980705	0.997119	1.02305	0.991802	Quantified
ENSRNOP00000006369	Sec23 homolog A, coat complex II component	Sec23a	pep chromosome:Rnor_6.0:6:80060916:80107236:-1 gene:ENSRNOG00000004657.6 transcript:ENSRNOT00000006369.6 gene_biotype:protein_coding transcript_biotype:protein_coding gene_symbol:Sec23a description:Sec23 homolog A, coat complex II component [Source:RGD Symbol;Acc:1309103]	29	17	20	45	765	86.1	7.08	0.980754	1.00144	0.981111	1.00267	0.986787	0.98127	1.03009	1.01067	1.03951	Quantified
ENSRNOP00000074961	ribonuclease/angiogenin inhibitor 1	Rnh1	pep chromosome:Rnor_6.0:1:214151343:214159157:-1 gene:ENSRNOG00000016416.7 transcript:ENSRNOT00000091292.1 gene_biotype:protein_coding transcript_biotype:protein_coding gene_symbol:Rnh1 description:ribonuclease/angiogenin inhibitor 1 [Source:RGD Symbol;Acc:621398]	57	19	19	44	492	54.1	4.98	1.04195	0.966327	1.02327	1.05206	0.978575	1.04166	1.00131	0.94025	0.96875	Quantified
ENSRNOP00000049438	acetyl-CoA carboxylase alpha	Acaca	pep chromosome:Rnor_6.0:10:71546977:71719910:1 gene:ENSRNOG00000034013.5 transcript:ENSRNOT00000041140.5 gene_biotype:protein_coding transcript_biotype:protein_coding gene_symbol:Acaca description:acetyl-CoA carboxylase alpha [Source:RGD Symbol;Acc:621248]	15	25	30	40	2083	236.4	6.39	0.955945	1.03007	0.962271	0.976798	1.06519	0.963587	1.00797	1.02497	1.02673	Quantified
ENSRNOP00000073890	high-mobility group (nonhistone chromosomal) protein 1-like 1	Hmg1l1	pep chromosome:Rnor_6.0:19:59984234:59985494:-1 gene:ENSRNOG00000051482.1 transcript:ENSRNOT00000086591.1 gene_biotype:protein_coding transcript_biotype:protein_coding gene_symbol:Hmg1l1 description:high-mobility group (nonhistone chromosomal) protein 1-like 1 [Source:RGD Symbol;Acc:1587112]	44	13	14	81	214	24.8	6.15	0.998529	1.0075	1.01977	0.983227	1.01378	0.893807	1.0249	0.963002	1.10622	Quantified
ENSRNOP00000043988	ribosomal protein S4, X-linked	Rps4x	pep chromosome:Rnor_6.0:4:35729628:35730599:-1 gene:ENSRNOG00000029574.2 transcript:ENSRNOT00000051149.2 gene_biotype:protein_coding transcript_biotype:protein_coding gene_symbol:Rps4x description:ribosomal protein S4, X-linked [Source:RGD Symbol;Acc:2324318]	53	17	17	107	290	32.5	10.07	1.02594	0.967836	1.02211	0.987702	0.942573	1.02843	0.992611	0.989923	1.05826	Quantified
ENSRNOP00000017965	lactate dehydrogenase B	Ldhb	pep chromosome:Rnor_6.0:4:176701983:176720012:-1 gene:ENSRNOG00000013000.7 transcript:ENSRNOT00000017965.7 gene_biotype:protein_coding transcript_biotype:protein_coding gene_symbol:Ldhb description:lactate dehydrogenase B [Source:RGD Symbol;Acc:2997]	45	13	16	114	334	36.6	6.05	0.954868	1.10134	1.05298	1.05089	1.01192	0.941184	0.957651	0.955467	0.986637	Quantified
ENSRNOP00000014780	glycyl-tRNA synthetase	Gars	pep chromosome:Rnor_6.0:4:85235172:85276044:1 gene:ENSRNOG00000011052.6 transcript:ENSRNOT00000014780.6 gene_biotype:protein_coding transcript_biotype:protein_coding gene_symbol:Gars description:glycyl-tRNA synthetase [Source:RGD Symbol;Acc:1307856]	31	23	23	54	728	81.7	6.57	1.01175	1.03203	1.01834	1.02538	0.960969	1.01561	0.981266	1.00443	0.965086	Quantified
ENSRNOP00000002075	integrin subunit alpha 6	Itga6	pep chromosome:Rnor_6.0:3:58443101:58515124:1 gene:ENSRNOG00000001518.7 transcript:ENSRNOT00000002075.4 gene_biotype:protein_coding transcript_biotype:protein_coding gene_symbol:Itga6 description:integrin subunit alpha 6 [Source:RGD Symbol;Acc:621633]	23	22	23	55	1073	119.4	7.06	0.983155	1.00924	0.961297	0.967634	1.02168	0.984971	0.99857	0.99147	1.0966	Quantified
ENSRNOP00000063494	DExD-box helicase 21	Ddx21	pep chromosome:Rnor_6.0:20:32213148:32232632:-1 gene:ENSRNOG00000043099.1 transcript:ENSRNOT00000068184.1 gene_biotype:protein_coding transcript_biotype:protein_coding gene_symbol:Ddx21 description:DExD-box helicase 21 [Source:RGD Symbol;Acc:1307306]	36	25	26	55	782	85.9	9.33	1.04293	0.995247	0.987196	1.01058	1.00915	1.0287	0.993364	0.983095	0.963651	Quantified
ENSRNOP00000015545	aldehyde dehydrogenase 6 family, member A1	Aldh6a1	pep chromosome:Rnor_6.0:6:108146582:108167185:-1 gene:ENSRNOG00000011419.4 transcript:ENSRNOT00000015545.4 gene_biotype:protein_coding transcript_biotype:protein_coding gene_symbol:Aldh6a1 description:aldehyde dehydrogenase 6 family, member A1 [Source:RGD Symbol;Acc:621556]	44	19	19	51	535	57.7	8.18	0.941043	0.998382	0.971712	0.998559	1.03212	1.01283	0.994486	1.01101	1.05587	Quantified
ENSRNOP00000023835	aldo-keto reductase family 1, member C14	Akr1c14	pep chromosome:Rnor_6.0:17:69806065:69827112:-1 gene:ENSRNOG00000017672.7 transcript:ENSRNOT00000023835.6 gene_biotype:protein_coding transcript_biotype:protein_coding gene_symbol:Akr1c14 description:aldo-keto reductase family 1, member C14 [Source:RGD Symbol;Acc:708361]	57	14	19	71	322	37	7.09	0.984317	0.833149	0.905393	0.793111	1.01179	1.34114	1.02407	1.08441	1.04689	Quantified
ENSRNOP00000014167	mechanistic target of rapamycin kinase	Mtor	pep chromosome:Rnor_6.0:5:165263800:165373967:1 gene:ENSRNOG00000009615.7 transcript:ENSRNOT00000014167.7 gene_biotype:protein_coding transcript_biotype:protein_coding gene_symbol:Mtor description:mechanistic target of rapamycin kinase [Source:RGD Symbol;Acc:68371]	13	31	31	37	2549	288.6	7.17	0.993911	0.986126	1.00575	0.994886	1.00328	1.00773	0.998976	1.01438	1.00945	Quantified
ENSRNOP00000006570	RNA 2',3'-cyclic phosphate and 5'-OH ligase	Rtcb	pep chromosome:Rnor_6.0:7:23913830:23933191:1 gene:ENSRNOG00000004813.5 transcript:ENSRNOT00000006570.5 gene_biotype:protein_coding transcript_biotype:protein_coding gene_symbol:Rtcb description:RNA 2',3'-cyclic phosphate and 5'-OH ligase [Source:RGD Symbol;Acc:1303261]	45	20	20	55	505	55.2	7.23	0.97758	0.999922	0.98745	1.00763	1.01517	0.980659	1.02794	1.00522	1.01212	Quantified
ENSRNOP00000004917	fumarate hydratase	Fh	pep chromosome:Rnor_6.0:13:93651484:93677377:-1 gene:ENSRNOG00000003653.5 transcript:ENSRNOT00000004917.5 gene_biotype:protein_coding transcript_biotype:protein_coding gene_symbol:Fh description:fumarate hydratase [Source:RGD Symbol;Acc:2614]	40	17	17	96	507	54.4	8.73	0.985547	0.991925	0.971466	0.953659	1.01716	1.00777	1.03411	1.00167	1.05096	Quantified
ENSRNOP00000006109	lumican	Lum	pep chromosome:Rnor_6.0:7:38819771:38826862:1 gene:ENSRNOG00000004610.4 transcript:ENSRNOT00000006109.4 gene_biotype:protein_coding transcript_biotype:protein_coding gene_symbol:Lum description:lumican [Source:RGD Symbol;Acc:620984]	44	13	13	112	338	38.3	6.43	0.821931	1.18935	0.838256	1.02428	1.06103	0.935424	1.02507	1.06501	1.05702	Quantified
ENSRNOP00000027445	myosin light chain 9	Myl9	pep chromosome:Rnor_6.0:3:152857592:152863960:1 gene:ENSRNOG00000020246.7 transcript:ENSRNOT00000027445.7 gene_biotype:protein_coding transcript_biotype:protein_coding gene_symbol:Myl9 description:myosin light chain 9 [Source:RGD Symbol;Acc:1311235]	66	4	11	86	172	19.8	4.92	0.991898	1.10235	0.949707	0.99339	1.04248	0.990539	1.0659	0.967342	0.908378	Quantified
ENSRNOP00000019914	hemoglobin, beta adult s chain	Hbb-bs	pep chromosome:Rnor_6.0:1:168945567:168953025:1 gene:ENSRNOG00000047098.2 transcript:ENSRNOT00000019913.6 gene_biotype:protein_coding transcript_biotype:protein_coding gene_symbol:Hbb-bs description:hemoglobin, beta adult s chain [Source:RGD Symbol;Acc:1597422]	54	5	9	606	147	16	8.19	0.864153	0.795994	0.964959	1.11425	0.988504	1.40476	0.905833	1.07358	0.918706	Quantified
ENSRNOP00000019133	keratin 19	Krt19	pep chromosome:Rnor_6.0:10:88055841:88060561:-1 gene:ENSRNOG00000014233.4 transcript:ENSRNOT00000019133.4 gene_biotype:protein_coding transcript_biotype:protein_coding gene_symbol:Krt19 description:keratin 19 [Source:RGD Symbol;Acc:619936]	55	17	24	56	403	44.6	5.31	0.728496	0.934646	1.53288	1.02619	1.51376	0.901482	0.722181	0.872813	0.771433	Quantified
ENSRNOP00000069066	golgin A4	Golga4	pep chromosome:Rnor_6.0:8:127171537:127248511:1 gene:ENSRNOG00000029910.5 transcript:ENSRNOT00000078625.1 gene_biotype:protein_coding transcript_biotype:protein_coding gene_symbol:Golga4 description:golgin A4 [Source:RGD Symbol;Acc:1591925]	12	26	26	30	2281	262.3	5.34	0.974837	0.980302	1.00707	1.00926	1.01969	1.06107	1.00424	0.995121	0.964003	Quantified
ENSRNOP00000074138	dysferlin	Dysf	pep chromosome:Rnor_6.0:4:115712850:115901868:1 gene:ENSRNOG00000032788.5 transcript:ENSRNOT00000085765.1 gene_biotype:protein_coding transcript_biotype:protein_coding gene_symbol:Dysf description:dysferlin [Source:RGD Symbol;Acc:1311023]	14	28	29	39	2134	242.3	5.8	1.00028	1.02632	0.950171	0.967434	1.00096	0.995489	1.03602	1.00332	1.0341	Quantified
ENSRNOP00000010660	keratin 7	Krt7	pep chromosome:Rnor_6.0:7:143059764:143075907:1 gene:ENSRNOG00000008057.6 transcript:ENSRNOT00000010660.6 gene_biotype:protein_coding transcript_biotype:protein_coding gene_symbol:Krt7 description:keratin 7 [Source:RGD Symbol;Acc:1310865]	41	16	21	88	457	50.8	5.87	0.76936	1.07367	1.56792	1.14673	0.888965	1.02606	0.752016	0.938198	0.853737	Quantified
ENSRNOP00000025887	proteasome activator subunit 1	Psme1	pep chromosome:Rnor_6.0:15:34256071:34258947:1 gene:ENSRNOG00000019041.6 transcript:ENSRNOT00000025887.5 gene_biotype:protein_coding transcript_biotype:protein_coding gene_symbol:Psme1 description:proteasome activator subunit 1 [Source:RGD Symbol;Acc:3429]	57	16	16	85	249	28.6	5.81	1.02547	1.05284	1.05271	1.00685	1.00455	0.962222	0.99988	0.954575	0.952065	Quantified
ENSRNOP00000004609	myosin ID	Myo1d	pep chromosome:Rnor_6.0:10:67866940:68142864:-1 gene:ENSRNOG00000003276.5 transcript:ENSRNOT00000004609.4 gene_biotype:protein_coding transcript_biotype:protein_coding gene_symbol:Myo1d description:myosin ID [Source:RGD Symbol;Acc:621321]	33	28	30	50	1006	116	9.41	0.980984	1.03301	0.972539	0.979988	1.03201	0.986248	1.01722	1.00248	1.00916	Quantified
ENSRNOP00000005611	aldehyde dehydrogenase 9 family, member A1	Aldh9a1	pep chromosome:Rnor_6.0:13:85580828:85597493:1 gene:ENSRNOG00000004027.5 transcript:ENSRNOT00000005611.5 gene_biotype:protein_coding transcript_biotype:protein_coding gene_symbol:Aldh9a1 description:aldehyde dehydrogenase 9 family, member A1 [Source:RGD Symbol;Acc:68409]	44	17	17	58	497	54	6.67	0.998176	1.00542	1.04416	1.0152	1.03031	0.986506	0.988934	0.97116	0.972735	Quantified
ENSRNOP00000073711	CAP-GLY domain containing linker protein 1	Clip1	pep chromosome:Rnor_6.0:12:38377034:38452652:1 gene:ENSRNOG00000001247.7 transcript:ENSRNOT00000088002.1 gene_biotype:protein_coding transcript_biotype:protein_coding gene_symbol:Clip1 description:CAP-GLY domain containing linker protein 1 [Source:RGD Symbol;Acc:67404]	20	3	29	38	1416	159.4	5.16	0.983383	0.991084	0.98442	0.971531	1.01342	1.01591	1.04221	1.0136	0.998584	Quantified
ENSRNOP00000056912	plastin 3	Pls3	pep chromosome:Rnor_6.0:X:119030419:119124250:1 gene:ENSRNOG00000027520.5 transcript:ENSRNOT00000060168.2 gene_biotype:protein_coding transcript_biotype:protein_coding gene_symbol:Pls3 description:plastin 3 [Source:RGD Symbol;Acc:621409]	41	19	25	72	630	70.7	5.54	1.03258	1.03785	0.982985	1.01774	0.969254	1.00784	0.971998	1.00081	0.993815	Quantified
ENSRNOP00000072844	propionyl-CoA carboxylase subunit alpha	Pcca	pep chromosome:Rnor_6.0:15:108960562:109306603:1 gene:ENSRNOG00000057042.1 transcript:ENSRNOT00000077482.1 gene_biotype:protein_coding transcript_biotype:protein_coding gene_symbol:Pcca description:propionyl-CoA carboxylase subunit alpha [Source:RGD Symbol;Acc:3264]	36	24	24	42	723	79.8	7.21	0.91373	0.885295	0.960681	0.964698	1.03736	1.08645	1.07771	0.980341	1.11113	Quantified
ENSRNOP00000072011	tyrosine 3-monooxygenase/tryptophan 5-monooxygenase activation protein, theta	Ywhaq	pep chromosome:Rnor_6.0:6:43463294:43493816:-1 gene:ENSRNOG00000051650.1 transcript:ENSRNOT00000077786.1 gene_biotype:protein_coding transcript_biotype:protein_coding gene_symbol:Ywhaq description:tyrosine 3-monooxygenase/tryptophan 5-monooxygenase activation protein, theta [Source:RGD Symbol;Acc:3979]	52	9	15	141	245	27.8	4.78	1.02561	1.03618	1.01274	0.994933	0.993754	0.974415	1.00098	0.978978	0.994987	Quantified
ENSRNOP00000061495	phosphoribosylaminoimidazole carboxylase and phosphoribosylaminoimidazolesuccinocarboxamide synthase	Paics	pep chromosome:Rnor_6.0:14:33563886:33580566:-1 gene:ENSRNOG00000002101.6 transcript:ENSRNOT00000063942.1 gene_biotype:protein_coding transcript_biotype:protein_coding gene_symbol:Paics description:phosphoribosylaminoimidazole carboxylase and phosphoribosylaminoimidazolesuccinocarboxamide synthase [Source:RGD Symbol;Acc:620066]	43	16	16	41	425	47.1	7.69	1.00507	0.997686	1.03891	1.05869	0.971374	1.01802	0.955269	0.970617	0.999628	Quantified
ENSRNOP00000072434	plexin B2	Plxnb2	pep chromosome:Rnor_6.0:7:130135464:130151880:-1 gene:ENSRNOG00000007133.7 transcript:ENSRNOT00000088623.1 gene_biotype:protein_coding transcript_biotype:protein_coding gene_symbol:Plxnb2 description:plexin B2 [Source:RGD Symbol;Acc:1305495]	17	27	27	37	1841	205.8	5.99	0.991917	0.982672	1.01252	1.00567	1.00013	0.991243	1.00978	1.0097	1.01027	Quantified
ENSRNOP00000015518	heterogeneous nuclear ribonucleoprotein H2	Hnrnph2	pep chromosome:Rnor_6.0:X:105419285:105422861:1 gene:ENSRNOG00000011661.5 transcript:ENSRNOT00000015518.4 gene_biotype:protein_coding transcript_biotype:protein_coding gene_symbol:Hnrnph2 description:heterogeneous nuclear ribonucleoprotein H2 [Source:RGD Symbol;Acc:1549784]	44	6	16	55	449	49.3	6.3	0.990546	0.932167	0.989734	0.995598	0.998424	1.10387	0.999257	0.99532	1.01248	Quantified
ENSRNOP00000000696	prosaposin	Psap	pep chromosome:Rnor_6.0:20:29831314:29856875:1 gene:ENSRNOG00000000571.6 transcript:ENSRNOT00000000696.5 gene_biotype:protein_coding transcript_biotype:protein_coding gene_symbol:Psap description:prosaposin [Source:RGD Symbol;Acc:3423]	29	16	16	151	557	61.4	5.2	1.00708	0.978331	0.953994	0.925567	0.994249	1.07689	1.09019	0.999644	0.988907	Quantified
ENSRNOP00000069659	apolipoprotein A4	Apoa4	pep chromosome:Rnor_6.0:8:50537009:50539376:1 gene:ENSRNOG00000055909.1 transcript:ENSRNOT00000080658.1 gene_biotype:protein_coding transcript_biotype:protein_coding gene_symbol:Apoa4 description:apolipoprotein A4 [Source:RGD Symbol;Acc:2132]	46	17	17	41	392	44.3	5.22	1.02239	1.13713	1.03022	1.01342	0.94283	0.9836	0.924095	1.02672	0.934142	Quantified
ENSRNOP00000075701	tyrosine 3-monooxygenase/tryptophan 5-monooxygenase activation protein, eta	Ywhah	pep chromosome:Rnor_6.0:14:83053041:83062424:-1 gene:ENSRNOG00000055471.1 transcript:ENSRNOT00000085735.1 gene_biotype:protein_coding transcript_biotype:protein_coding gene_symbol:Ywhah description:tyrosine 3-monooxygenase/tryptophan 5-monooxygenase activation protein, eta [Source:RGD Symbol;Acc:3978]	49	8	14	137	246	28.2	4.89	1.05516	1.04897	0.979006	1.01765	0.991602	0.945463	0.995355	0.993772	0.984964	Quantified
ENSRNOP00000072090	tubulin, beta 5 class I	Tubb5	pep chromosome:Rnor_6.0:20:3422461:3425901:1 gene:ENSRNOG00000061216.1 transcript:ENSRNOT00000084917.1 gene_biotype:protein_coding transcript_biotype:protein_coding gene_symbol:Tubb5 description:tubulin, beta 5 class I [Source:RGD Symbol;Acc:628596]	65	1	13	231	212	24.3	5	1.00182	0.971978	0.941547	1.04556	0.916054	0.996583	0.998762	1.09404	1.05105	Quantified
ENSRNOP00000057275	afamin	Afm	pep chromosome:Rnor_6.0:14:19078680:19132208:-1 gene:ENSRNOG00000002878.6 transcript:ENSRNOT00000060535.4 gene_biotype:protein_coding transcript_biotype:protein_coding gene_symbol:Afm description:afamin [Source:RGD Symbol;Acc:628614]	45	26	26	69	608	69.2	6.21	1.02078	1.09208	1.09025	1.01301	0.934934	0.952346	0.906117	1.0454	0.958782	Quantified
ENSRNOP00000016563	CCR4-NOT transcription complex, subunit 1	Cnot1	pep chromosome:Rnor_6.0:19:9668186:9761605:1 gene:ENSRNOG00000012271.5 transcript:ENSRNOT00000016563.5 gene_biotype:protein_coding transcript_biotype:protein_coding gene_symbol:Cnot1 description:CCR4-NOT transcription complex, subunit 1 [Source:RGD Symbol;Acc:1308009]	14	32	32	38	2376	266.7	7.11	1.00399	1.00088	1.01181	1.00937	1.0013	0.992865	0.993352	1.02657	0.973703	Quantified
ENSRNOP00000007223	SAC1 like phosphatidylinositide phosphatase	Sacm1l	pep chromosome:Rnor_6.0:8:132607166:132663502:1 gene:ENSRNOG00000005149.6 transcript:ENSRNOT00000007223.5 gene_biotype:protein_coding transcript_biotype:protein_coding gene_symbol:Sacm1l description:SAC1 like phosphatidylinositide phosphatase [Source:RGD Symbol;Acc:69223]	43	25	25	48	587	67	7.28	0.996678	0.995674	0.974235	0.973168	1.00026	1.00358	1.01467	1.00617	1.05018	Quantified
ENSRNOP00000069900	protein phosphatase 1, regulatory subunit 12A	Ppp1r12a	pep chromosome:Rnor_6.0:7:51404919:51515373:-1 gene:ENSRNOG00000004925.8 transcript:ENSRNOT00000080285.1 gene_biotype:protein_coding transcript_biotype:protein_coding gene_symbol:Ppp1r12a description:protein phosphatase 1, regulatory subunit 12A [Source:RGD Symbol;Acc:620013]	27	27	29	40	1032	115.2	5.47	0.978721	1.07276	0.96846	1.01172	1.00061	0.960813	1.02565	1.00327	0.991418	Quantified
ENSRNOP00000028244	SWI/SNF related, matrix associated, actin dependent regulator of chromatin, subfamily c, member 2	Smarcc2	pep chromosome:Rnor_6.0:7:2875909:2904453:1 gene:ENSRNOG00000031135.6 transcript:ENSRNOT00000028244.7 gene_biotype:protein_coding transcript_biotype:protein_coding gene_symbol:Smarcc2 description:SWI/SNF related, matrix associated, actin dependent regulator of chromatin, subfamily c, member 2 [Source:RGD Symbol;Acc:1597704]	23	19	26	42	1135	124.7	5.44	1.01428	1.00269	0.985457	1.01128	0.999195	0.955461	1.00129	1.01211	1.03141	Quantified
ENSRNOP00000068707	heterogeneous nuclear ribonucleoprotein H1	Hnrnph1	pep chromosome:Rnor_6.0:10:35870232:35878775:1 gene:ENSRNOG00000003399.8 transcript:ENSRNOT00000078505.1 gene_biotype:protein_coding transcript_biotype:protein_coding gene_symbol:Hnrnph1 description:heterogeneous nuclear ribonucleoprotein H1 [Source:RGD Symbol;Acc:620840]	39	4	15	55	449	49.2	6.3	1.01072	0.958995	1.02995	1.01223	0.999419	0.975518	1.01195	0.99572	1.01838	Quantified
ENSRNOP00000069802	exportin 7	Xpo7	pep chromosome:Rnor_6.0:15:52357853:52443055:-1 gene:ENSRNOG00000013288.7 transcript:ENSRNOT00000087450.1 gene_biotype:protein_coding transcript_biotype:protein_coding gene_symbol:Xpo7 description:exportin 7 [Source:RGD Symbol;Acc:1310928]	23	22	22	45	1087	123.7	6.38	0.994679	0.99823	0.980514	1.02552	0.994427	0.95073	1.00822	1.01521	1.04613	Quantified
ENSRNOP00000005311	collagen type I alpha 1 chain	Col1a1	pep chromosome:Rnor_6.0:10:82745801:82762789:1 gene:ENSRNOG00000003897.6 transcript:ENSRNOT00000005311.6 gene_biotype:protein_coding transcript_biotype:protein_coding gene_symbol:Col1a1 description:collagen type I alpha 1 chain [Source:RGD Symbol;Acc:61817]	12	16	16	90	1453	137.9	5.92	0.883434	1.15937	1.07157	1.13758	1.1313	1.0904	0.986229	1.08524	0.468611	Quantified
ENSRNOP00000036487	CDC42 binding protein kinase beta	Cdc42bpb	pep chromosome:Rnor_6.0:6:135746754:135830086:-1 gene:ENSRNOG00000009675.5 transcript:ENSRNOT00000039059.3 gene_biotype:protein_coding transcript_biotype:protein_coding gene_symbol:Cdc42bpb description:CDC42 binding protein kinase beta [Source:RGD Symbol;Acc:621753]	15	21	27	41	1713	194.8	6.46	1.00942	0.989307	0.996805	1.00253	0.990848	1.01694	1.01183	0.98407	1.01263	Quantified
ENSRNOP00000003891	septin 9	Sept9	pep chromosome:Rnor_6.0:10:106264434:106348490:1 gene:ENSRNOG00000002807.8 transcript:ENSRNOT00000003891.6 gene_biotype:protein_coding transcript_biotype:protein_coding gene_symbol:Sept9 description:septin 9 [Source:MGI Symbol;Acc:MGI:1858222]	41	24	24	64	566	63.8	8.62	1.01654	1.03328	0.993266	1.00874	0.965901	0.954906	0.991244	0.998502	1.05129	Quantified
ENSRNOP00000007794	destrin, actin depolymerizing factor	Dstn	pep chromosome:Rnor_6.0:3:138024508:138051298:1 gene:ENSRNOG00000005924.6 transcript:ENSRNOT00000007794.6 gene_biotype:protein_coding transcript_biotype:protein_coding gene_symbol:Dstn description:destrin, actin depolymerizing factor [Source:RGD Symbol;Acc:1588366]	64	14	15	99	165	18.5	8.03	1.01574	1.10395	0.936404	0.993122	0.969588	0.959878	1.02624	1.00822	1.00038	Quantified
ENSRNOP00000001625	phosphofructokinase, liver type	Pfkl	pep chromosome:Rnor_6.0:20:11393877:11415882:1 gene:ENSRNOG00000001214.5 transcript:ENSRNOT00000001625.5 gene_biotype:protein_coding transcript_biotype:protein_coding gene_symbol:Pfkl description:phosphofructokinase, liver type [Source:RGD Symbol;Acc:3311]	30	16	21	54	780	85.3	7.4	0.998881	0.983226	1.01122	1.04186	0.963817	1.00321	0.970707	1.05224	0.990508	Quantified
ENSRNOP00000027045	thimet oligopeptidase 1	Thop1	pep chromosome:Rnor_6.0:7:11501146:11513581:-1 gene:ENSRNOG00000019924.6 transcript:ENSRNOT00000027045.6 gene_biotype:protein_coding transcript_biotype:protein_coding gene_symbol:Thop1 description:thimet oligopeptidase 1 [Source:RGD Symbol;Acc:68330]	36	22	23	43	687	78.3	5.94	0.948995	1.04315	1.05527	1.0545	0.9872	0.945508	0.997092	1.00965	0.971919	Quantified
ENSRNOP00000001115	DExD-box helicase 39B	Ddx39b	pep chromosome:Rnor_6.0:20:4806108:4818568:-1 gene:ENSRNOG00000000841.7 transcript:ENSRNOT00000001115.6 gene_biotype:protein_coding transcript_biotype:protein_coding gene_symbol:Ddx39b description:DExD-box helicase 39B [Source:RGD Symbol;Acc:70923]	36	8	17	58	428	49	5.67	1.0075	1.02238	1.00059	1.00669	1.00535	0.892191	1.0448	1.00365	1.02734	Quantified
ENSRNOP00000052823	chromodomain helicase DNA binding protein 4	Chd4	pep chromosome:Rnor_6.0:4:157612536:157645659:1 gene:ENSRNOG00000018309.7 transcript:ENSRNOT00000055970.4 gene_biotype:protein_coding transcript_biotype:protein_coding gene_symbol:Chd4 description:chromodomain helicase DNA binding protein 4 [Source:RGD Symbol;Acc:620064]	13	20	24	39	1921	218	5.81	1.01424	1.00461	1.01241	1.03261	0.991166	0.962638	1.00346	0.984609	1.00712	Quantified
ENSRNOP00000019685	phenylalanyl-tRNA synthetase subunit beta	Farsb	pep chromosome:Rnor_6.0:9:84324442:84383687:-1 gene:ENSRNOG00000014119.5 transcript:ENSRNOT00000019685.5 gene_biotype:protein_coding transcript_biotype:protein_coding gene_symbol:Farsb description:phenylalanyl-tRNA synthetase subunit beta [Source:RGD Symbol;Acc:1303210]	35	20	20	50	589	65.6	7.05	0.964652	0.954257	0.977465	0.984122	1.00287	1.08924	1.00364	1.0164	1.02503	Quantified
ENSRNOP00000010948	dynamin 2	Dnm2	pep chromosome:Rnor_6.0:8:22458933:22540032:1 gene:ENSRNOG00000007649.8 transcript:ENSRNOT00000010947.5 gene_biotype:protein_coding transcript_biotype:protein_coding gene_symbol:Dnm2 description:dynamin 2 [Source:RGD Symbol;Acc:2513]	31	14	25	58	870	98.2	7.43	1.00711	1.01909	0.980278	0.977139	1.02027	0.992477	1.00508	1.00987	1.00226	Quantified
ENSRNOP00000031615	protein tyrosine kinase 2 beta	Ptk2b	pep chromosome:Rnor_6.0:15:42827310:42947656:-1 gene:ENSRNOG00000027839.6 transcript:ENSRNOT00000030007.3 gene_biotype:protein_coding transcript_biotype:protein_coding gene_symbol:Ptk2b description:protein tyrosine kinase 2 beta [Source:RGD Symbol;Acc:628758]	28	26	27	47	1009	115.7	6.33	1.04525	0.917965	0.941468	0.886249	0.999985	1.17477	1.00449	1.03725	1.01103	Quantified
ENSRNOP00000025446	enoyl-CoA hydratase, mitochondrial-like	LOC100911186	pep chromosome:Rnor_6.0:1:212570195:212579057:-1 gene:ENSRNOG00000018522.6 transcript:ENSRNOT00000025446.6 gene_biotype:protein_coding transcript_biotype:protein_coding gene_symbol:LOC100911186 description:enoyl-CoA hydratase, mitochondrial-like [Source:RGD Symbol;Acc:6494098]	46	14	14	77	290	31.5	8.13	0.946541	0.978196	0.964156	0.951851	1.023	1.03344	1.03291	1.02183	1.06406	Quantified
ENSRNOP00000028680	nodal modulator 1	Nomo1	pep chromosome:Rnor_6.0:1:102017263:102068870:1 gene:ENSRNOG00000021118.5 transcript:ENSRNOT00000028680.5 gene_biotype:protein_coding transcript_biotype:protein_coding gene_symbol:Nomo1 description:nodal modulator 1 [Source:RGD Symbol;Acc:1305240]	24	24	24	33	1214	133.4	6.07	1.02993	0.991668	0.989525	0.990662	0.974444	0.985987	0.988952	0.999155	1.06391	Quantified
ENSRNOP00000024632	AFG3 like matrix AAA peptidase subunit 2	Afg3l2	pep chromosome:Rnor_6.0:18:63141418:63185510:-1 gene:ENSRNOG00000017965.5 transcript:ENSRNOT00000024632.5 gene_biotype:protein_coding transcript_biotype:protein_coding gene_symbol:Afg3l2 description:AFG3 like matrix AAA peptidase subunit 2 [Source:RGD Symbol;Acc:1305259]	36	23	28	55	802	89.3	8.6	0.94026	0.949094	0.952788	0.922562	1.05257	1.02668	1.05959	1.04946	1.06226	Quantified
ENSRNOP00000001518	ribosomal protein lateral stalk subunit P0	Rplp0	pep chromosome:Rnor_6.0:12:46791528:46794797:-1 gene:ENSRNOG00000001148.6 transcript:ENSRNOT00000001518.6 gene_biotype:protein_coding transcript_biotype:protein_coding gene_symbol:Rplp0 description:ribosomal protein lateral stalk subunit P0 [Source:RGD Symbol;Acc:621247]	44	11	11	63	317	34.2	6.25	1.02261	0.965286	0.995069	1.01767	0.990483	1.03532	0.991622	0.985896	1.01114	Quantified
ENSRNOP00000000481	Ski2 like RNA helicase	Skiv2l	pep chromosome:Rnor_6.0:20:4519474:4530126:-1 gene:ENSRNOG00000000421.4 transcript:ENSRNOT00000000481.4 gene_biotype:protein_coding transcript_biotype:protein_coding gene_symbol:Skiv2l description:Ski2 like RNA helicase [Source:RGD Symbol;Acc:1303059]	23	25	25	35	1244	137.2	6.38	0.986699	0.965117	1.01161	0.997886	1.00513	1.05349	1.00001	0.989225	1.00641	Quantified
ENSRNOP00000006591	nucleophosmin 1	Npm1	pep chromosome:Rnor_6.0:10:18080950:18090950:-1 gene:ENSRNOG00000004616.8 transcript:ENSRNOT00000006591.7 gene_biotype:protein_coding transcript_biotype:protein_coding gene_symbol:Npm1 description:nucleophosmin 1 [Source:RGD Symbol;Acc:3192]	47	8	13	69	292	32.5	4.77	1.04934	1.02975	0.992452	1.03278	0.957291	0.953113	0.970693	0.988331	1.03969	Quantified
ENSRNOP00000047378	Rho-associated coiled-coil containing protein kinase 1	Rock1	pep chromosome:Rnor_6.0:18:1276391:1389929:-1 gene:ENSRNOG00000031092.6 transcript:ENSRNOT00000051362.5 gene_biotype:protein_coding transcript_biotype:protein_coding gene_symbol:Rock1 description:Rho-associated coiled-coil containing protein kinase 1 [Source:RGD Symbol;Acc:620424]	19	20	27	36	1369	159.6	5.94	1.01152	1.02236	1.01595	0.986404	0.997531	1.01494	1.00359	1.00043	0.960975	Quantified
ENSRNOP00000011930	phospholipase B domain containing 1	Plbd1	pep chromosome:Rnor_6.0:4:170564367:170620703:-1 gene:ENSRNOG00000008933.6 transcript:ENSRNOT00000011930.6 gene_biotype:protein_coding transcript_biotype:protein_coding gene_symbol:Plbd1 description:phospholipase B domain containing 1 [Source:RGD Symbol;Acc:1308734]	30	15	15	69	550	63	8.6	1.01091	0.932363	0.895782	1.02596	1.031	1.01539	1.08794	0.985955	1.02889	Quantified
ENSRNOP00000019108	acyl-CoA dehydrogenase family, member 9	Acad9	pep chromosome:Rnor_6.0:2:122782060:122805768:1 gene:ENSRNOG00000014178.5 transcript:ENSRNOT00000019108.5 gene_biotype:protein_coding transcript_biotype:protein_coding gene_symbol:Acad9 description:acyl-CoA dehydrogenase family, member 9 [Source:RGD Symbol;Acc:727973]	32	22	22	58	625	68.8	7.69	0.945254	0.984418	0.981164	0.929674	1.04487	0.996411	1.04136	0.998514	1.09254	Quantified
ENSRNOP00000032890	dihydrolipoamide S-acetyltransferase	Dlat	pep chromosome:Rnor_6.0:8:55062551:55087832:-1 gene:ENSRNOG00000009994.5 transcript:ENSRNOT00000032152.4 gene_biotype:protein_coding transcript_biotype:protein_coding gene_symbol:Dlat description:dihydrolipoamide S-acetyltransferase [Source:RGD Symbol;Acc:619859]	36	18	18	56	632	67.1	8.53	0.932374	0.934751	0.934464	0.895617	1.07408	1.05784	1.03708	1.01439	1.13602	Quantified
ENSRNOP00000016981	tyrosine 3-monooxygenase/tryptophan 5-monooxygenase activation protein, beta	Ywhab	pep chromosome:Rnor_6.0:3:160391106:160399931:1 gene:ENSRNOG00000010945.6 transcript:ENSRNOT00000016981.6 gene_biotype:protein_coding transcript_biotype:protein_coding gene_symbol:Ywhab description:tyrosine 3-monooxygenase/tryptophan 5-monooxygenase activation protein, beta [Source:RGD Symbol;Acc:61998]	52	5	12	142	246	28	4.88	1.00334	0.960866	0.948593	1.00617	0.997582	1.04267	0.980419	0.999775	1.07742	Quantified
ENSRNOP00000071404	peptidylprolyl isomerase A (cyclophilin A)-like 4D	Ppial4d	pep chromosome:Rnor_6.0:14:22706901:22707668:1 gene:ENSRNOG00000055068.1 transcript:ENSRNOT00000088798.1 gene_biotype:protein_coding transcript_biotype:protein_coding gene_symbol:Ppial4d description:peptidylprolyl isomerase A (cyclophilin A)-like 4D [Source:RGD Symbol;Acc:2321083]	77	12	12	257	164	17.9	8.16	1.02298	1.02162	0.950892	1.00402	0.983308	0.976123	0.987615	1.00348	1.06455	Quantified
ENSRNOP00000075450	pyruvate dehydrogenase E1 beta subunit	Pdhb	pep chromosome:Rnor_6.0:15:18539210:18546673:1 gene:ENSRNOG00000007895.5 transcript:ENSRNOT00000083212.1 gene_biotype:protein_coding transcript_biotype:protein_coding gene_symbol:Pdhb description:pyruvate dehydrogenase E1 beta subunit [Source:RGD Symbol;Acc:1359146]	30	10	10	56	423	46.2	8.41	0.896254	0.924223	0.952524	0.882319	1.10745	1.07264	1.0672	1.02699	1.08658	Quantified
ENSRNOP00000013785	phosphoglucomutase 1	Pgm1	pep chromosome:Rnor_6.0:5:118743632:118803055:1 gene:ENSRNOG00000009889.6 transcript:ENSRNOT00000013785.6 gene_biotype:protein_coding transcript_biotype:protein_coding gene_symbol:Pgm1 description:phosphoglucomutase 1 [Source:RGD Symbol;Acc:3316]	49	23	23	49	562	61.4	6.57	0.999016	1.02903	1.00538	1.03063	0.991711	0.953513	0.987705	1.0042	1.01221	Quantified
ENSRNOP00000025224	ribosomal protein SA	Rpsa	pep chromosome:Rnor_6.0:8:128806129:128809986:1 gene:ENSRNOG00000018645.5 transcript:ENSRNOT00000025225.5 gene_biotype:protein_coding transcript_biotype:protein_coding gene_symbol:Rpsa description:ribosomal protein SA [Source:RGD Symbol;Acc:71026]	52	12	12	57	295	32.8	4.87	1.02538	1.01661	0.953511	1.03543	0.957494	1.00317	0.98205	1.0068	1.03529	Quantified
ENSRNOP00000001954	tyrosine 3-monooxygenase/tryptophan 5-monooxygenase activation protein, gamma	Ywhag	pep chromosome:Rnor_6.0:12:23789638:23817883:1 gene:ENSRNOG00000001436.5 transcript:ENSRNOT00000001954.3 gene_biotype:protein_coding transcript_biotype:protein_coding gene_symbol:Ywhag description:tyrosine 3-monooxygenase/tryptophan 5-monooxygenase activation protein, gamma [Source:RGD Symbol;Acc:62002]	60	7	14	158	247	28.3	4.89	1.02934	1.01952	0.924215	0.979048	0.993673	1.00816	1.01708	1.01648	1.02725	Quantified
ENSRNOP00000018310	thioredoxin domain containing 5	Txndc5	pep chromosome:Rnor_6.0:17:26925828:26953970:1 gene:ENSRNOG00000013469.7 transcript:ENSRNOT00000018310.7 gene_biotype:protein_coding transcript_biotype:protein_coding gene_symbol:Txndc5 description:thioredoxin domain containing 5 [Source:RGD Symbol;Acc:2323973]	47	15	15	59	417	46.3	5.88	1.0973	0.93694	1.02278	1.10592	0.904497	1.02307	0.967475	1.00788	0.949091	Quantified
ENSRNOP00000071780	actin related protein 3	Actr3	pep chromosome:Rnor_6.0:13:41695183:41738658:-1 gene:ENSRNOG00000003206.7 transcript:ENSRNOT00000084552.1 gene_biotype:protein_coding transcript_biotype:protein_coding gene_symbol:Actr3 description:actin related protein 3 [Source:RGD Symbol;Acc:71024]	44	15	15	53	419	47.6	6.18	1.06825	1.05872	0.974743	0.971646	0.967989	0.965182	1.00653	0.99659	1.00268	Quantified
ENSRNOP00000074683	NEDD4 E3 ubiquitin protein ligase	Nedd4	pep chromosome:Rnor_6.0:8:79323408:79408833:1 gene:ENSRNOG00000058898.1 transcript:ENSRNOT00000088391.1 gene_biotype:protein_coding transcript_biotype:protein_coding gene_symbol:Nedd4 description:NEDD4 E3 ubiquitin protein ligase [Source:RGD Symbol;Acc:3157]	30	25	27	51	889	102.7	5.24	1.03621	1.01788	0.998065	1.03665	1.00695	0.987401	1.02003	0.982484	0.926581	Quantified
ENSRNOP00000033826	ATP binding cassette subfamily C member 4	Abcc4	pep chromosome:Rnor_6.0:15:103696557:103927592:-1 gene:ENSRNOG00000010064.8 transcript:ENSRNOT00000031036.6 gene_biotype:protein_coding transcript_biotype:protein_coding gene_symbol:Abcc4 description:ATP binding cassette subfamily C member 4 [Source:RGD Symbol;Acc:620266]	22	29	29	48	1325	148.8	8.21	0.970607	0.973628	0.951097	0.943743	1.04855	1.00102	1.00959	1.03938	1.07735	Quantified
ENSRNOP00000063646	3-oxoacid CoA transferase 1	Oxct1	pep chromosome:Rnor_6.0:2:53859737:54007756:1 gene:ENSRNOG00000043094.3 transcript:ENSRNOT00000065313.3 gene_biotype:protein_coding transcript_biotype:protein_coding gene_symbol:Oxct1 description:3-oxoacid CoA transferase 1 [Source:RGD Symbol;Acc:1584008]	39	17	17	58	520	56.2	8.47	0.950315	1.0075	0.941728	0.911359	1.02708	1.09508	1.00051	0.992283	1.09218	Quantified
ENSRNOP00000010386	glyoxalase domain containing 4	Glod4	pep chromosome:Rnor_6.0:10:64379921:64398294:-1 gene:ENSRNOG00000007788.7 transcript:ENSRNOT00000010386.7 gene_biotype:protein_coding transcript_biotype:protein_coding gene_symbol:Glod4 description:glyoxalase domain containing 4 [Source:RGD Symbol;Acc:1307010]	60	18	18	62	298	33.2	5.27	1.01306	1.01969	1.01746	0.988635	1.01106	0.92709	1.02657	0.976297	1.03115	Quantified
ENSRNOP00000025782	eukaryotic translation initiation factor 3, subunit C	Eif3c	pep chromosome:Rnor_6.0:1:197964407:197982601:-1 gene:ENSRNOG00000018761.6 transcript:ENSRNOT00000025782.6 gene_biotype:protein_coding transcript_biotype:protein_coding gene_symbol:Eif3c description:eukaryotic translation initiation factor 3, subunit C [Source:RGD Symbol;Acc:1308871]	23	24	24	58	911	105.4	5.78	1.02726	0.988634	1.00406	1.00017	0.986874	1.0045	1.01434	0.9863	1.00141	Quantified
ENSRNOP00000018462	voltage-dependent anion channel 2	Vdac2	pep chromosome:Rnor_6.0:15:2634624:2648294:-1 gene:ENSRNOG00000013505.6 transcript:ENSRNOT00000018462.6 gene_biotype:protein_coding transcript_biotype:protein_coding gene_symbol:Vdac2 description:voltage-dependent anion channel 2 [Source:RGD Symbol;Acc:621576]	57	12	13	85	295	31.7	7.49	0.974842	0.956616	0.980489	0.951874	0.992529	1.013	1.0221	1.01235	1.11178	Quantified
ENSRNOP00000006273	alpha-1-B glycoprotein	A1bg	pep chromosome:Rnor_6.0:7:102294797:102298522:-1 gene:ENSRNOG00000004692.7 transcript:ENSRNOT00000006273.6 gene_biotype:protein_coding transcript_biotype:protein_coding gene_symbol:A1bg description:alpha-1-B glycoprotein [Source:RGD Symbol;Acc:69417]	29	14	14	98	513	56.4	7.28	1.32298	1.38474	1.22777	1.08829	0.822582	0.828514	0.644616	0.982471	0.704489	Quantified
ENSRNOP00000023984	inter-alpha trypsin inhibitor, heavy chain 3	Itih3	pep chromosome:Rnor_6.0:16:6992171:7007051:-1 gene:ENSRNOG00000017689.7 transcript:ENSRNOT00000023984.6 gene_biotype:protein_coding transcript_biotype:protein_coding gene_symbol:Itih3 description:inter-alpha trypsin inhibitor, heavy chain 3 [Source:RGD Symbol;Acc:620633]	22	17	17	39	887	99	6.25	0.969656	1.09828	1.09989	1.0235	0.922669	0.999679	0.923376	0.998354	0.980208	Quantified
ENSRNOP00000034945	methionyl-tRNA synthetase 1	Mars1	pep chromosome:Rnor_6.0:7:70585013:70602310:-1 gene:ENSRNOG00000025459.4 transcript:ENSRNOT00000035486.4 gene_biotype:protein_coding transcript_biotype:protein_coding gene_symbol:Mars1 description:methionyl-tRNA synthetase 1 [Source:RGD Symbol;Acc:1305321]	29	25	25	40	902	101.5	6.46	1.00743	0.99154	1.01352	0.967975	1.00433	1.00896	1.01573	0.992676	1.01142	Quantified
ENSRNOP00000002862	signal recognition particle subunit SRP72-like	LOC108348180	pep chromosome:Rnor_6.0:14:33447591:33560503:-1 gene:ENSRNOG00000002100.6 transcript:ENSRNOT00000002862.6 gene_biotype:protein_coding transcript_biotype:protein_coding gene_symbol:LOC108348180 description:signal recognition particle subunit SRP72-like [Source:RGD Symbol;Acc:11405956]	32	16	21	44	670	74.6	9.17	1.02181	0.990163	0.98712	0.992126	0.999136	1.02155	1.0007	0.988382	1.01344	Quantified
ENSRNOP00000040162	serine/threonine-protein kinase PAK 2-like	LOC100910732	pep chromosome:Rnor_6.0:11:71959228:72017463:1 gene:ENSRNOG00000001747.5 transcript:ENSRNOT00000049862.3 gene_biotype:protein_coding transcript_biotype:protein_coding gene_symbol:LOC100910732 description:serine/threonine-protein kinase PAK 2-like [Source:RGD Symbol;Acc:6497075]	36	10	17	40	524	57.9	5.77	1.05719	1.03778	1.03889	1.00347	0.990058	0.981663	0.976068	0.966416	0.96045	Quantified
ENSRNOP00000069786	microtubule-associated protein 4	Map4	pep chromosome:Rnor_6.0:8:118066988:118158032:1 gene:ENSRNOG00000020748.7 transcript:ENSRNOT00000056161.4 gene_biotype:protein_coding transcript_biotype:protein_coding gene_symbol:Map4 description:microtubule-associated protein 4 [Source:RGD Symbol;Acc:1564359]	12	2	24	37	2201	233.3	5.62	1.01721	1.00725	1.02434	1.01085	1.0032	1.02753	0.985488	0.979457	0.958691	Quantified
ENSRNOP00000073681	H1.2 linker histone, cluster member	H1f2	pep chromosome:Rnor_6.0:17:43639749:43640387:-1 gene:ENSRNOG00000054978.1 transcript:ENSRNOT00000087731.1 gene_biotype:protein_coding transcript_biotype:protein_coding gene_symbol:H1f2 description:H1.2 linker histone, cluster member [Source:RGD Symbol;Acc:1587893]	40	3	13	262	212	21.3	11	0.953486	1.0064	1.01775	0.894618	1.06552	0.893004	1.10024	0.990732	1.08744	Quantified
ENSRNOP00000066622	histone cluster 1, H4m	Hist1h4m	pep chromosome:Rnor_6.0:17:43673294:43673605:1 gene:ENSRNOG00000046636.1 transcript:ENSRNOT00000074109.1 gene_biotype:protein_coding transcript_biotype:protein_coding gene_symbol:Hist1h4m description:histone cluster 1, H4m [Source:RGD Symbol;Acc:1306905]	60	10	10	473	103	11.4	11.36	1.02991	1.00663	0.991543	0.95822	1.00226	0.851016	1.05914	0.956553	1.15384	Quantified
ENSRNOP00000063207	ribophorin II	Rpn2	pep chromosome:Rnor_6.0:3:153398130:153445632:1 gene:ENSRNOG00000007492.7 transcript:ENSRNOT00000068135.2 gene_biotype:protein_coding transcript_biotype:protein_coding gene_symbol:Rpn2 description:ribophorin II [Source:RGD Symbol;Acc:62075]	30	15	15	57	631	69	5.97	1.0056	0.992229	0.98929	0.99781	0.983209	0.998951	1.01161	1.0242	1.01155	Quantified
ENSRNOP00000013997	proteasome 26S subunit, ATPase 5	Psmc5	pep chromosome:Rnor_6.0:10:94445877:94451811:1 gene:ENSRNOG00000010038.6 transcript:ENSRNOT00000013997.6 gene_biotype:protein_coding transcript_biotype:protein_coding gene_symbol:Psmc5 description:proteasome 26S subunit, ATPase 5 [Source:RGD Symbol;Acc:708376]	51	18	19	58	406	45.6	7.55	1.03446	1.01473	0.989759	1.03703	0.976959	1.0152	0.977019	0.987849	0.981698	Quantified
ENSRNOP00000063496	annexin A3	Anxa3	pep chromosome:Rnor_6.0:14:14371928:14426437:-1 gene:ENSRNOG00000002045.7 transcript:ENSRNOT00000068134.3 gene_biotype:protein_coding transcript_biotype:protein_coding gene_symbol:Anxa3 description:annexin A3 [Source:RGD Symbol;Acc:2119]	57	20	20	44	324	36.3	6.35	0.995363	1.01925	1.02752	0.958154	0.96973	1.01366	1.04331	0.978118	1.00851	Quantified
ENSRNOP00000022309	glutamic-oxaloacetic transaminase 1	Got1	pep chromosome:Rnor_6.0:1:263246248:263269762:-1 gene:ENSRNOG00000016356.7 transcript:ENSRNOT00000022309.7 gene_biotype:protein_coding transcript_biotype:protein_coding gene_symbol:Got1 description:glutamic-oxaloacetic transaminase 1 [Source:RGD Symbol;Acc:2721]	55	21	21	69	413	46.4	7.21	1.0731	1.05553	0.989519	1.08146	0.901182	0.958117	0.925251	0.976659	1.05418	Quantified
ENSRNOP00000069329	X-prolyl aminopeptidase 1	Xpnpep1	pep chromosome:Rnor_6.0:1:273708212:273758442:-1 gene:ENSRNOG00000012084.5 transcript:ENSRNOT00000088016.1 gene_biotype:protein_coding transcript_biotype:protein_coding gene_symbol:Xpnpep1 description:X-prolyl aminopeptidase 1 [Source:RGD Symbol;Acc:621274]	38	24	24	49	666	74.6	5.9	0.966791	0.996905	0.990964	1.00514	1.0308	0.98368	1.01813	0.978444	1.043	Quantified
ENSRNOP00000028084	vesicle amine transport 1	Vat1	pep chromosome:Rnor_6.0:10:89366899:89374516:-1 gene:ENSRNOG00000020684.5 transcript:ENSRNOT00000028084.5 gene_biotype:protein_coding transcript_biotype:protein_coding gene_symbol:Vat1 description:vesicle amine transport 1 [Source:RGD Symbol;Acc:1308943]	41	13	13	61	404	43.1	6.62	1.0151	1.01864	0.947629	0.97339	1.00249	1.01085	1.02073	0.988048	1.03756	Quantified
ENSRNOP00000029182	sorbin and SH3 domain containing 2	Sorbs2	pep chromosome:Rnor_6.0:16:49626205:49820235:-1 gene:ENSRNOG00000013391.8 transcript:ENSRNOT00000029628.6 gene_biotype:protein_coding transcript_biotype:protein_coding gene_symbol:Sorbs2 description:sorbin and SH3 domain containing 2 [Source:RGD Symbol;Acc:620061]	17	20	21	57	1196	134.1	8.41	0.954839	1.01245	0.926792	0.968938	1.0989	0.982168	1.04243	1.0199	1.00688	Quantified
ENSRNOP00000015122	creatine kinase B	Ckb	pep chromosome:Rnor_6.0:6:136142956:136145837:-1 gene:ENSRNOG00000010872.5 transcript:ENSRNOT00000015122.5 gene_biotype:protein_coding transcript_biotype:protein_coding gene_symbol:Ckb description:creatine kinase B [Source:RGD Symbol;Acc:2357]	60	16	16	49	381	42.7	5.67	1.02668	1.21243	0.949875	1.0431	0.956207	0.901847	0.96226	0.983225	0.976961	Quantified
ENSRNOP00000030696	ubiquitin specific peptidase 24	Usp24	pep chromosome:Rnor_6.0:5:125896725:126030401:1 gene:ENSRNOG00000005802.7 transcript:ENSRNOT00000029228.6 gene_biotype:protein_coding transcript_biotype:protein_coding gene_symbol:Usp24 description:ubiquitin specific peptidase 24 [Source:RGD Symbol;Acc:1306799]	11	25	25	33	2617	293.8	6.14	1.03348	1.00829	0.983144	1.0054	0.984294	1.00496	0.987326	1.01369	0.993771	Quantified
ENSRNOP00000039132	sec1 family domain containing 1	Scfd1	pep chromosome:Rnor_6.0:6:72124417:72202713:1 gene:ENSRNOG00000031203.5 transcript:ENSRNOT00000040548.2 gene_biotype:protein_coding transcript_biotype:protein_coding gene_symbol:Scfd1 description:sec1 family domain containing 1 [Source:RGD Symbol;Acc:619828]	35	18	18	36	637	72.2	6.51	1.04595	1.05594	1.09206	1.10567	0.975137	0.993843	0.933164	0.908761	0.901979	Quantified
ENSRNOP00000060335	splicing factor 3b, subunit 2	Sf3b2	pep chromosome:Rnor_6.0:1:220645672:220665603:-1 gene:ENSRNOG00000020412.7 transcript:ENSRNOT00000068497.3 gene_biotype:protein_coding transcript_biotype:protein_coding gene_symbol:Sf3b2 description:splicing factor 3b, subunit 2 [Source:RGD Symbol;Acc:1307159]	27	24	24	45	878	98.1	5.62	1.03195	1.01173	0.982682	1.01655	0.982588	0.935243	1.02074	0.999113	1.03161	Quantified
ENSRNOP00000028390	nucleobindin 1	Nucb1	pep chromosome:Rnor_6.0:1:101480145:101500850:-1 gene:ENSRNOG00000020889.7 transcript:ENSRNOT00000028390.5 gene_biotype:protein_coding transcript_biotype:protein_coding gene_symbol:Nucb1 description:nucleobindin 1 [Source:RGD Symbol;Acc:620030]	40	20	20	39	459	53.5	5.12	0.989537	0.963782	0.980313	0.988978	0.990585	1.03841	1.04025	0.999216	1.0242	Quantified
ENSRNOP00000024622	LRRGT00080	LOC501233	pep chromosome:Rnor_6.0:19:15294248:15335002:1 gene:ENSRNOG00000015438.5 transcript:ENSRNOT00000024622.7 gene_biotype:protein_coding transcript_biotype:protein_coding gene_symbol:LOC501233 description:LRRGT00080 [Source:RGD Symbol;Acc:1564453]	25	9	14	74	584	64.2	6.43	0.873499	1.05594	0.983031	1.00539	0.93187	1.03654	0.982609	1.11288	1.03834	Quantified
ENSRNOP00000072183	guanine monophosphate synthase	Gmps	pep chromosome:Rnor_6.0:2:154556029:154590643:1 gene:ENSRNOG00000051151.2 transcript:ENSRNOT00000084238.1 gene_biotype:protein_coding transcript_biotype:protein_coding gene_symbol:Gmps description:guanine monophosphate synthase [Source:RGD Symbol;Acc:1310063]	33	22	22	46	700	77.8	6.86	0.97369	0.984295	0.95685	1.03157	0.976871	1.03755	1.00902	1.0435	1.00362	Quantified
ENSRNOP00000048736	KN motif and ankyrin repeat domains 2	Kank2	pep chromosome:Rnor_6.0:8:22791995:22821397:-1 gene:ENSRNOG00000010643.7 transcript:ENSRNOT00000045488.4 gene_biotype:protein_coding transcript_biotype:protein_coding gene_symbol:Kank2 description:KN motif and ankyrin repeat domains 2 [Source:RGD Symbol;Acc:2320289]	28	19	21	45	847	90.8	5.43	1.01176	1.05097	0.956164	1.00561	1.011	0.981535	1.0482	0.98575	0.961668	Quantified
ENSRNOP00000059624	cofilin 1	Cfl1	pep chromosome:Rnor_6.0:1:220869805:220873337:1 gene:ENSRNOG00000020660.7 transcript:ENSRNOT00000015962.6 gene_biotype:protein_coding transcript_biotype:protein_coding gene_symbol:Cfl1 description:cofilin 1 [Source:RGD Symbol;Acc:69285]	72	12	15	76	166	18.5	8.09	1.13156	1.06496	0.992999	0.973947	0.933943	0.978606	0.995062	0.974208	0.966254	Quantified
ENSRNOP00000023072	aldo-keto reductase family 1 member A1	Akr1a1	pep chromosome:Rnor_6.0:5:135482068:135498822:-1 gene:ENSRNOG00000016727.5 transcript:ENSRNOT00000023072.5 gene_biotype:protein_coding transcript_biotype:protein_coding gene_symbol:Akr1a1 description:aldo-keto reductase family 1 member A1 [Source:RGD Symbol;Acc:68346]	59	19	19	85	325	36.5	7.31	0.966109	1.03259	1.00104	1.00276	1.00044	0.970039	0.988038	1.01686	1.03658	Quantified
ENSRNOP00000070286	family with sequence similarity 49, member B	Fam49b	pep chromosome:Rnor_6.0:7:104516391:104556419:-1 gene:ENSRNOG00000061246.1 transcript:ENSRNOT00000090784.1 gene_biotype:protein_coding transcript_biotype:protein_coding gene_symbol:Fam49b description:family with sequence similarity 49, member B [Source:RGD Symbol;Acc:1307697]	58	13	15	34	324	36.8	6.06	0.95229	0.987847	1.05971	1.02763	1.02087	0.967061	1.02609	0.985592	0.985497	Quantified
ENSRNOP00000019696	heterochromatin protein 1, binding protein 3	Hp1bp3	pep chromosome:Rnor_6.0:5:156587093:156607673:1 gene:ENSRNOG00000014445.7 transcript:ENSRNOT00000019696.7 gene_biotype:protein_coding transcript_biotype:protein_coding gene_symbol:Hp1bp3 description:heterochromatin protein 1, binding protein 3 [Source:RGD Symbol;Acc:735099]	31	19	19	46	553	60.9	9.66	0.997117	1.00092	0.998536	0.981141	1.02269	0.888162	1.04452	0.994305	1.08312	Quantified
ENSRNOP00000022836	elongator complex protein 1	Elp1	pep chromosome:Rnor_6.0:5:73503407:73552798:-1 gene:ENSRNOG00000016725.5 transcript:ENSRNOT00000022836.5 gene_biotype:protein_coding transcript_biotype:protein_coding gene_symbol:Elp1 description:elongator complex protein 1 [Source:RGD Symbol;Acc:620072]	17	21	21	32	1331	149.1	6.34	0.968119	1.01238	0.993261	1.03567	1.00112	0.994668	1.00939	1.00312	0.996978	Quantified
ENSRNOP00000066786	H1.4 linker histone, cluster member	H1f4	pep chromosome:Rnor_6.0:17:43734461:43735120:1 gene:ENSRNOG00000047459.1 transcript:ENSRNOT00000072564.1 gene_biotype:protein_coding transcript_biotype:protein_coding gene_symbol:H1f4 description:H1.4 linker histone, cluster member [Source:RGD Symbol;Acc:2776]	42	4	14	269	219	22	11.11	0.985217	1.00679	1.02807	0.9184	1.04225	0.876762	1.10236	0.973475	1.07493	Quantified
ENSRNOP00000072766	CAP-GLY domain containing linker protein 1	Clip1	pep chromosome:Rnor_6.0:12:38375416:38451226:1 gene:ENSRNOG00000001247.7 transcript:ENSRNOT00000078530.1 gene_biotype:protein_coding transcript_biotype:protein_coding gene_symbol:Clip1 description:CAP-GLY domain containing linker protein 1 [Source:RGD Symbol;Acc:67404]	19	1	27	35	1320	148.2	5.31	0.969226	0.966448	1.02138	1.02523	1.02627	1.05225	1.00107	1.00426	0.949162	Quantified
ENSRNOP00000028217	RuvB-like AAA ATPase 2	Ruvbl2	pep chromosome:Rnor_6.0:1:101413766:101426852:-1 gene:ENSRNOG00000020793.6 transcript:ENSRNOT00000028217.6 gene_biotype:protein_coding transcript_biotype:protein_coding gene_symbol:Ruvbl2 description:RuvB-like AAA ATPase 2 [Source:RGD Symbol;Acc:1306509]	40	17	17	30	463	51.1	5.64	0.956832	1.01164	1.01179	1.06934	0.983047	0.978469	1.01283	0.988638	1.002	Quantified
ENSRNOP00000007766	ADP ribosylation factor guanine nucleotide exchange factor 1	Arfgef1	pep chromosome:Rnor_6.0:5:8666200:8760458:1 gene:ENSRNOG00000005703.7 transcript:ENSRNOT00000007766.7 gene_biotype:protein_coding transcript_biotype:protein_coding gene_symbol:Arfgef1 description:ADP ribosylation factor guanine nucleotide exchange factor 1 [Source:RGD Symbol;Acc:1560793]	13	14	24	42	1846	207.8	5.77	0.999791	1.02171	0.958055	1.00502	0.991084	0.987103	1.00289	1.02382	1.02528	Quantified
ENSRNOP00000022194	serpin family B member 9	Serpinb9	pep chromosome:Rnor_6.0:17:32650441:32661865:-1 gene:ENSRNOG00000033772.5 transcript:ENSRNOT00000022194.7 gene_biotype:protein_coding transcript_biotype:protein_coding gene_symbol:Serpinb9 description:serpin family B member 9 [Source:RGD Symbol;Acc:1549730]	49	16	16	51	374	42.3	5.86	0.99159	1.03114	1.00176	1.0252	1.01707	0.979025	0.994034	1.00373	0.969901	Quantified
ENSRNOP00000016389	transforming growth factor, beta induced	Tgfbi	pep chromosome:Rnor_6.0:17:8400146:8429338:-1 gene:ENSRNOG00000012216.7 transcript:ENSRNOT00000016390.7 gene_biotype:protein_coding transcript_biotype:protein_coding gene_symbol:Tgfbi description:transforming growth factor, beta induced [Source:RGD Symbol;Acc:620017]	32	19	19	67	685	74.7	7.5	1.00808	1.08867	0.879418	1.02486	0.9849	1.08191	1.06999	0.974521	0.90377	Quantified
ENSRNOP00000019797	pyruvate dehydrogenase (lipoamide) alpha 1-like 1	AABR07026654.1	pep chromosome:Rnor_6.0:16:88345247:88347369:-1 gene:ENSRNOG00000014745.5 transcript:ENSRNOT00000019797.5 gene_biotype:protein_coding transcript_biotype:protein_coding gene_symbol:AABR07026654.1 description:pyruvate dehydrogenase (lipoamide) alpha 1-like 1 [Source:NCBI gene;Acc:685778]	40	18	18	75	390	43.2	8.19	0.931743	0.942401	0.973188	0.920164	1.06168	1.03926	1.03772	1.02661	1.08291	Quantified
ENSRNOP00000014704	solute carrier family 25 member 4	Slc25a4	pep chromosome:Rnor_6.0:16:49266903:49270698:1 gene:ENSRNOG00000010830.4 transcript:ENSRNOT00000014704.4 gene_biotype:protein_coding transcript_biotype:protein_coding gene_symbol:Slc25a4 description:solute carrier family 25 member 4 [Source:RGD Symbol;Acc:620352]	45	7	15	132	298	32.9	9.74	1.02844	0.962905	0.925411	0.988919	0.968192	1.04113	1.00123	1.00899	1.09158	Quantified
ENSRNOP00000043843	acylaminoacyl-peptide hydrolase	Apeh	pep chromosome:Rnor_6.0:8:116862625:116872215:-1 gene:ENSRNOG00000029572.3 transcript:ENSRNOT00000045410.3 gene_biotype:protein_coding transcript_biotype:protein_coding gene_symbol:Apeh description:acylaminoacyl-peptide hydrolase [Source:RGD Symbol;Acc:2125]	27	18	18	39	732	81.3	5.73	0.980354	0.96948	1.01242	1.02551	1.00426	1.05583	0.982911	1.01011	0.975253	Quantified
ENSRNOP00000070071		AC123346.1	pep chromosome:Rnor_6.0:10:89236258:89311138:1 gene:ENSRNOG00000053448.1 transcript:ENSRNOT00000077603.1 gene_biotype:protein_coding transcript_biotype:nonsense_mediated_decay gene_symbol:AC123346.1	15	19	19	64	1358	151.6	6.67	0.918238	1.0397	0.958507	0.967126	1.18619	0.942994	1.04054	1.00401	0.953381	Quantified
ENSRNOP00000059233	NCK-associated protein 1	Nckap1	pep chromosome:Rnor_6.0:3:67725947:67787990:-1 gene:ENSRNOG00000007518.7 transcript:ENSRNOT00000064851.3 gene_biotype:protein_coding transcript_biotype:protein_coding gene_symbol:Nckap1 description:NCK-associated protein 1 [Source:RGD Symbol;Acc:61939]	19	20	20	33	1093	124.5	6.64	1.00231	1.03024	1.00867	0.986578	1.00004	0.966427	1.01805	1.00162	0.998703	Quantified
ENSRNOP00000020537	ubiquitin specific peptidase 14	Usp14	pep chromosome:Rnor_6.0:18:1178787:1216379:-1 gene:ENSRNOG00000014981.7 transcript:ENSRNOT00000020537.6 gene_biotype:protein_coding transcript_biotype:protein_coding gene_symbol:Usp14 description:ubiquitin specific peptidase 14 [Source:RGD Symbol;Acc:1311825]	42	18	18	36	493	55.9	5.2	1.00565	1.01584	1.01654	1.0011	1.02879	1.04356	0.963246	0.98263	0.957335	Quantified
ENSRNOP00000017353	EH-domain containing 2	Ehd2	pep chromosome:Rnor_6.0:1:77847600:77865870:-1 gene:ENSRNOG00000011346.5 transcript:ENSRNOT00000017353.5 gene_biotype:protein_coding transcript_biotype:protein_coding gene_symbol:Ehd2 description:EH-domain containing 2 [Source:RGD Symbol;Acc:1560856]	45	19	23	58	543	61.2	6.55	0.929264	1.06323	0.953778	0.96412	1.14171	0.941512	1.02291	1.02521	0.969927	Quantified
ENSRNOP00000075466	glutaminase	Gls	pep chromosome:Rnor_6.0:9:54212767:54260786:1 gene:ENSRNOG00000056246.1 transcript:ENSRNOT00000078073.1 gene_biotype:protein_coding transcript_biotype:protein_coding gene_symbol:Gls description:glutaminase [Source:RGD Symbol;Acc:2707]	38	3	16	31	602	65.8	8.12	0.991506	0.996991	0.951185	1.04442	1.00334	1.00304	1.01643	0.997668	1.01044	Quantified
ENSRNOP00000053011	microtubule-associated protein 4	Map4	pep chromosome:Rnor_6.0:8:118013612:118159933:1 gene:ENSRNOG00000020748.7 transcript:ENSRNOT00000056166.4 gene_biotype:protein_coding transcript_biotype:protein_coding gene_symbol:Map4 description:microtubule-associated protein 4 [Source:RGD Symbol;Acc:1564359]	25	1	23	36	1057	110.2	4.73	1.02259	0.989524	0.935518	0.999344	1.00793	1.07286	1.02992	1.00694	0.951031	Quantified
ENSRNOP00000006070	decorin	Dcn	pep chromosome:Rnor_6.0:7:38742051:38782323:1 gene:ENSRNOG00000004554.6 transcript:ENSRNOT00000006070.6 gene_biotype:protein_coding transcript_biotype:protein_coding gene_symbol:Dcn description:decorin [Source:RGD Symbol;Acc:61895]	41	13	14	69	354	39.8	8.79	0.759654	1.13058	0.916849	1.05936	1.12283	0.990206	1.03876	1.03642	0.962646	Quantified
ENSRNOP00000024083	electron transfer flavoprotein subunit beta	Etfb	pep chromosome:Rnor_6.0:1:98472745:98486976:-1 gene:ENSRNOG00000017851.5 transcript:ENSRNOT00000024083.5 gene_biotype:protein_coding transcript_biotype:protein_coding gene_symbol:Etfb description:electron transfer flavoprotein subunit beta [Source:RGD Symbol;Acc:1303312]	57	15	15	49	255	27.7	7.75	1.00662	0.977716	0.93954	0.958796	0.996601	1.04392	1.02915	1.0458	1.01767	Quantified
ENSRNOP00000019642	proteasome 26S subunit, non-ATPase 13	Psmd13	pep chromosome:Rnor_6.0:1:213636093:213648488:1 gene:ENSRNOG00000014109.6 transcript:ENSRNOT00000019642.6 gene_biotype:protein_coding transcript_biotype:protein_coding gene_symbol:Psmd13 description:proteasome 26S subunit, non-ATPase 13 [Source:RGD Symbol;Acc:1305236]	55	19	19	72	376	42.8	5.83	1.0339	1.00459	0.991074	1.01341	0.975709	0.993773	0.995195	0.998234	1.00809	Quantified
ENSRNOP00000022828	peptidylprolyl isomerase B	Ppib	pep chromosome:Rnor_6.0:8:71719563:71725562:1 gene:ENSRNOG00000016781.7 transcript:ENSRNOT00000022828.7 gene_biotype:protein_coding transcript_biotype:protein_coding gene_symbol:Ppib description:peptidylprolyl isomerase B [Source:RGD Symbol;Acc:620312]	51	13	13	102	216	23.8	9.5	1.0537	0.985481	0.993483	1.0223	0.938684	1.02219	0.984834	0.981588	1.03293	Quantified
ENSRNOP00000051714	EH-domain containing 1	Ehd1	pep chromosome:Rnor_6.0:1:221644867:221667239:1 gene:ENSRNOG00000043503.2 transcript:ENSRNOT00000054830.2 gene_biotype:protein_coding transcript_biotype:protein_coding gene_symbol:Ehd1 description:EH-domain containing 1 [Source:RGD Symbol;Acc:1309017]	40	11	21	47	534	60.6	6.83	0.993203	1.046	0.987979	1.01767	1.02555	1.00658	0.997357	0.985606	0.953928	Quantified
ENSRNOP00000071306	anoctamin 1	Ano1	pep chromosome:Rnor_6.0:1:217754336:217844957:-1 gene:ENSRNOG00000020865.7 transcript:ENSRNOT00000090653.1 gene_biotype:protein_coding transcript_biotype:protein_coding gene_symbol:Ano1 description:anoctamin 1 [Source:RGD Symbol;Acc:1310786]	22	26	26	46	982	113.3	8.41	1.0124	1.07181	1.00205	1.03584	0.963759	0.921372	1.01468	0.937451	1.0527	Quantified
ENSRNOP00000053432	poly(A) binding protein, cytoplasmic 4	Pabpc4	pep chromosome:Rnor_6.0:5:140979435:140994732:1 gene:ENSRNOG00000015642.6 transcript:ENSRNOT00000056592.3 gene_biotype:protein_coding transcript_biotype:protein_coding gene_symbol:Pabpc4 description:poly(A) binding protein, cytoplasmic 4 [Source:RGD Symbol;Acc:1305015]	26	10	18	68	644	70.8	9.26	1.02559	0.998302	1.00055	0.997082	0.987995	0.991629	1.00905	1.00059	1.00265	Quantified
ENSRNOP00000046491	heterogeneous nuclear ribonucleoprotein D	Hnrnpd	pep chromosome:Rnor_6.0:14:11256268:11274578:1 gene:ENSRNOG00000002292.8 transcript:ENSRNOT00000047840.5 gene_biotype:protein_coding transcript_biotype:protein_coding gene_symbol:Hnrnpd description:heterogeneous nuclear ribonucleoprotein D [Source:RGD Symbol;Acc:620365]	36	2	14	77	353	38.2	7.81	0.985367	0.988463	0.992739	1.02016	0.987981	0.920895	1.02162	0.984484	1.11126	Quantified
ENSRNOP00000051742	cortactin	Cttn	pep chromosome:Rnor_6.0:1:217602698:217638118:-1 gene:ENSRNOG00000047280.3 transcript:ENSRNOT00000054859.5 gene_biotype:protein_coding transcript_biotype:protein_coding gene_symbol:Cttn description:cortactin [Source:RGD Symbol;Acc:619839]	41	23	23	53	546	61	5.31	0.987198	1.03121	1.02434	1.07895	0.950004	0.935592	0.96521	1.00164	1.04017	Quantified
ENSRNOP00000050029	RAN GTPase activating protein 1	Rangap1	pep chromosome:Rnor_6.0:7:122940376:122967178:-1 gene:ENSRNOG00000031789.5 transcript:ENSRNOT00000052098.5 gene_biotype:protein_coding transcript_biotype:protein_coding gene_symbol:Rangap1 description:RAN GTPase activating protein 1 [Source:RGD Symbol;Acc:1310380]	32	18	18	35	586	63.1	4.72	0.989229	0.971809	0.992533	0.944532	1.02914	1.04417	1.01546	1.00984	1.01813	Quantified
ENSRNOP00000020196	haptoglobin	Hp	pep chromosome:Rnor_6.0:19:42097995:42100804:1 gene:ENSRNOG00000014964.8 transcript:ENSRNOT00000020197.6 gene_biotype:protein_coding transcript_biotype:protein_coding gene_symbol:Hp description:haptoglobin [Source:RGD Symbol;Acc:2825]	51	18	18	45	346	38.4	6.54	1.25932	1.2784	0.96489	0.743189	0.814145	1.07308	0.701667	1.25219	0.931714	Quantified
ENSRNOP00000021514	ubiquinol cytochrome c reductase core protein 2	Uqcrc2	pep chromosome:Rnor_6.0:1:190555177:190585734:1 gene:ENSRNOG00000036742.3 transcript:ENSRNOT00000021514.5 gene_biotype:protein_coding transcript_biotype:protein_coding gene_symbol:Uqcrc2 description:ubiquinol cytochrome c reductase core protein 2 [Source:RGD Symbol;Acc:1359150]	47	17	17	69	452	48.4	9.14	0.990382	0.983787	0.981524	0.974508	1.00719	1.01058	1.00313	1.00793	1.05593	Quantified
ENSRNOP00000003046	COP9 signalosome subunit 4	Cops4	pep chromosome:Rnor_6.0:14:10718844:10749120:-1 gene:ENSRNOG00000023650.5 transcript:ENSRNOT00000003046.6 gene_biotype:protein_coding transcript_biotype:protein_coding gene_symbol:Cops4 description:COP9 signalosome subunit 4 [Source:RGD Symbol;Acc:1302952]	60	21	21	34	406	46.3	5.85	0.986595	1.02488	0.970739	1.02888	0.997054	0.980364	1.00712	1.01072	1.00809	Quantified
ENSRNOP00000071305	early endosome antigen 1	Eea1	pep chromosome:Rnor_6.0:7:37018459:37186732:1 gene:ENSRNOG00000021681.6 transcript:ENSRNOT00000087297.1 gene_biotype:protein_coding transcript_biotype:protein_coding gene_symbol:Eea1 description:early endosome antigen 1 [Source:RGD Symbol;Acc:1310167]	17	26	26	37	1449	165.3	5.72	1.01259	0.99387	0.985077	1.00159	0.996302	1.06202	1.00735	0.990055	0.966556	Quantified
ENSRNOP00000070048	proteasome 26S subunit, non-ATPase 11	Psmd11	pep chromosome:Rnor_6.0:10:67810810:67856328:1 gene:ENSRNOG00000005538.7 transcript:ENSRNOT00000079156.1 gene_biotype:protein_coding transcript_biotype:protein_coding gene_symbol:Psmd11 description:proteasome 26S subunit, non-ATPase 11 [Source:RGD Symbol;Acc:1306450]	30	15	15	40	500	55.9	7.91	0.998134	0.992659	0.996685	1.0272	1.00517	1.01174	0.998427	0.980237	1.00426	Quantified
ENSRNOP00000007711	endoplasmic reticulum protein 44	Erp44	pep chromosome:Rnor_6.0:5:63937784:64030901:-1 gene:ENSRNOG00000005841.6 transcript:ENSRNOT00000007711.5 gene_biotype:protein_coding transcript_biotype:protein_coding gene_symbol:Erp44 description:endoplasmic reticulum protein 44 [Source:RGD Symbol;Acc:1309176]	39	14	14	52	406	46.8	5.27	1.02738	0.994057	1.00058	0.993668	0.967139	0.995901	1.00661	1.01246	1.01624	Quantified
ENSRNOP00000011082	serine hydroxymethyltransferase 2	Shmt2	pep chromosome:Rnor_6.0:7:70824715:70829815:-1 gene:ENSRNOG00000008106.4 transcript:ENSRNOT00000011082.4 gene_biotype:protein_coding transcript_biotype:protein_coding gene_symbol:Shmt2 description:serine hydroxymethyltransferase 2 [Source:RGD Symbol;Acc:1308582]	41	17	18	48	504	55.7	8.21	1.03848	1.01684	0.96015	1.00275	0.999999	0.958128	1.00321	1.03331	1.00009	Quantified
ENSRNOP00000027141	metastasis associated 1 family, member 2	Mta2	pep chromosome:Rnor_6.0:1:225140863:225149583:1 gene:ENSRNOG00000019913.5 transcript:ENSRNOT00000027141.5 gene_biotype:protein_coding transcript_biotype:protein_coding gene_symbol:Mta2 description:metastasis associated 1 family, member 2 [Source:RGD Symbol;Acc:1306743]	38	21	26	49	668	74.9	9.67	1.01413	0.994482	1.03024	1.00267	0.978089	0.964615	0.988516	1.01154	1.02901	Quantified
ENSRNOP00000019508	ribosomal protein S2	Rps2	pep chromosome:Rnor_6.0:10:14088319:14089979:1 gene:ENSRNOG00000014179.7 transcript:ENSRNOT00000019508.6 gene_biotype:protein_coding transcript_biotype:protein_coding gene_symbol:Rps2 description:ribosomal protein S2 [Source:RGD Symbol;Acc:619887]	50	15	15	97	293	31.2	10.24	1.03145	0.976078	1.00229	0.98769	0.978114	1.01484	1.00279	0.998166	1.02285	Quantified
ENSRNOP00000011175	small RNA binding exonuclease protection factor La	Ssb	pep chromosome:Rnor_6.0:3:56092501:56102001:1 gene:ENSRNOG00000007998.5 transcript:ENSRNOT00000011174.5 gene_biotype:protein_coding transcript_biotype:protein_coding gene_symbol:Ssb description:small RNA binding exonuclease protection factor La [Source:RGD Symbol;Acc:620804]	42	20	20	53	415	47.8	9.76	1.03199	0.994281	0.997615	1.02064	0.968418	0.96663	1.00422	1.01337	1.0162	Quantified
ENSRNOP00000016432	RAB7A, member RAS oncogene family	Rab7a	pep chromosome:Rnor_6.0:4:119910478:119959173:-1 gene:ENSRNOG00000012247.6 transcript:ENSRNOT00000016432.6 gene_biotype:protein_coding transcript_biotype:protein_coding gene_symbol:Rab7a description:RAB7A, member RAS oncogene family [Source:RGD Symbol;Acc:61908]	78	14	14	54	207	23.5	6.7	1.03236	0.994802	0.958174	0.951659	0.975881	1.05377	1.00326	1.00029	1.04566	Quantified
ENSRNOP00000074337	integrin subunit alpha 1	Itga1	pep chromosome:Rnor_6.0:2:47127219:47281421:-1 gene:ENSRNOG00000053550.1 transcript:ENSRNOT00000086114.1 gene_biotype:protein_coding transcript_biotype:protein_coding gene_symbol:Itga1 description:integrin subunit alpha 1 [Source:RGD Symbol;Acc:2923]	16	21	21	42	1180	130.7	5.96	1.02949	1.04585	0.928506	0.965231	1.01568	0.999025	1.04019	1.00513	0.984159	Quantified
ENSRNOP00000034921	citrate synthase	Cs	pep chromosome:Rnor_6.0:7:2752680:2778963:1 gene:ENSRNOG00000023520.5 transcript:ENSRNOT00000033726.5 gene_biotype:protein_coding transcript_biotype:protein_coding gene_symbol:Cs description:citrate synthase [Source:RGD Symbol;Acc:620330]	33	15	15	91	466	51.8	8.41	0.953492	0.977668	0.956583	0.91609	1.05846	1.02408	1.04265	1.01014	1.07563	Quantified
ENSRNOP00000008737	FKBP prolyl isomerase 4	Fkbp4	pep chromosome:Rnor_6.0:4:161748993:161757447:-1 gene:ENSRNOG00000006444.6 transcript:ENSRNOT00000008737.6 gene_biotype:protein_coding transcript_biotype:protein_coding gene_symbol:Fkbp4 description:FKBP prolyl isomerase 4 [Source:RGD Symbol;Acc:628729]	41	21	21	38	458	51.4	5.62	1.13385	1.01865	1.10357	1.02012	0.919214	0.995782	0.925344	0.947692	0.9476	Quantified
ENSRNOP00000028875	signal recognition particle 68	Srp68	pep chromosome:Rnor_6.0:10:105123327:105228547:-1 gene:ENSRNOG00000009351.6 transcript:ENSRNOT00000028875.7 gene_biotype:protein_coding transcript_biotype:protein_coding gene_symbol:Srp68 description:signal recognition particle 68 [Source:RGD Symbol;Acc:1305376]	32	20	20	36	625	70.4	8.57	1.01015	0.979175	0.983439	1.00627	1.00212	1.04507	0.997213	1.01283	0.979126	Quantified
ENSRNOP00000073241	malic enzyme 2	Me2	pep chromosome:Rnor_6.0:18:69739675:69780922:-1 gene:ENSRNOG00000015582.6 transcript:ENSRNOT00000079093.1 gene_biotype:protein_coding transcript_biotype:protein_coding gene_symbol:Me2 description:malic enzyme 2 [Source:RGD Symbol;Acc:1310321]	34	18	19	46	591	66.3	7.91	0.977812	0.95063	1.00908	0.97675	1.01873	1.06713	1.00608	0.974097	1.03553	Quantified
ENSRNOP00000026653	cullin 4A	Cul4a	pep chromosome:Rnor_6.0:16:81719028:81756654:-1 gene:ENSRNOG00000019649.8 transcript:ENSRNOT00000026653.7 gene_biotype:protein_coding transcript_biotype:protein_coding gene_symbol:Cul4a description:cullin 4A [Source:RGD Symbol;Acc:1563853]	31	16	25	34	759	87.7	8.35	0.999283	1.01386	1.03469	1.03508	1.00123	0.969912	1.00427	0.978018	0.976298	Quantified
ENSRNOP00000065338	H1.3 linker histone, cluster member	H4f3	pep chromosome:Rnor_6.0:17:43797721:43798383:-1 gene:ENSRNOG00000048264.2 transcript:ENSRNOT00000075069.2 gene_biotype:protein_coding transcript_biotype:protein_coding gene_symbol:H4f3 description:H1.3 linker histone, cluster member [Source:RGD Symbol;Acc:1585568]	49	8	15	236	220	22.2	11.11	1.01175	1.02308	1.00225	0.925435	1.01714	0.872866	1.08188	0.984459	1.09002	Quantified
ENSRNOP00000043256	polypyrimidine tract binding protein 1	Ptbp1	pep chromosome:Rnor_6.0:7:12663965:12673718:-1 gene:ENSRNOG00000010448.9 transcript:ENSRNOT00000044865.7 gene_biotype:protein_coding transcript_biotype:protein_coding gene_symbol:Ptbp1 description:polypyrimidine tract binding protein 1 [Source:RGD Symbol;Acc:62047]	27	10	12	63	556	59.3	9.16	1.02113	1.01266	0.964744	0.99147	0.97089	0.901147	1.03002	1.03027	1.0899	Quantified
ENSRNOP00000037803	ferritin heavy chain 1	Fth1	pep chromosome:Rnor_6.0:1:226030938:226033228:1 gene:ENSRNOG00000022619.6 transcript:ENSRNOT00000030919.5 gene_biotype:protein_coding transcript_biotype:protein_coding gene_symbol:Fth1 description:ferritin heavy chain 1 [Source:RGD Symbol;Acc:2635]	64	11	11	52	182	21.1	6.01	0.941709	0.939068	0.964042	0.996218	1.04968	0.97593	1.12337	1.03636	0.986196	Quantified
ENSRNOP00000026799	aspartyl aminopeptidase	Dnpep	pep chromosome:Rnor_6.0:9:82505530:82514399:-1 gene:ENSRNOG00000019772.5 transcript:ENSRNOT00000026799.5 gene_biotype:protein_coding transcript_biotype:protein_coding gene_symbol:Dnpep description:aspartyl aminopeptidase [Source:RGD Symbol;Acc:1583848]	37	15	15	43	475	52.5	7.25	0.972229	1.00354	1.00674	1.00888	1.00581	0.994522	1.02337	1.00259	0.996319	Quantified
ENSRNOP00000009649	proteasome 26S subunit, ATPase 6	Psmc6	pep chromosome:Rnor_6.0:15:19667453:19688914:1 gene:ENSRNOG00000007203.5 transcript:ENSRNOT00000009649.5 gene_biotype:protein_coding transcript_biotype:protein_coding gene_symbol:Psmc6 description:proteasome 26S subunit, ATPase 6 [Source:RGD Symbol;Acc:1308825]	47	17	17	43	403	45.8	7.78	1.00692	0.999693	1.00912	0.995403	1.04045	0.98831	0.979811	0.982679	1.01077	Quantified
ENSRNOP00000001227	chaperonin containing TCP1 subunit 6A	Cct6a	pep chromosome:Rnor_6.0:12:30491416:30501860:-1 gene:ENSRNOG00000000923.8 transcript:ENSRNOT00000001227.7 gene_biotype:protein_coding transcript_biotype:protein_coding gene_symbol:Cct6a description:chaperonin containing TCP1 subunit 6A [Source:RGD Symbol;Acc:1304763]	31	14	18	66	531	58	7.08	1.03243	0.997266	1.02976	1.02558	0.9768	0.999129	0.993928	0.967676	0.990811	Quantified
ENSRNOP00000066302	eukaryotic translation initiation factor 4A3	Eif4a3	pep chromosome:Rnor_6.0:10:108415202:108425206:-1 gene:ENSRNOG00000045791.2 transcript:ENSRNOT00000073140.2 gene_biotype:protein_coding transcript_biotype:protein_coding gene_symbol:Eif4a3 description:eukaryotic translation initiation factor 4A3 [Source:RGD Symbol;Acc:1591139]	36	14	17	52	411	46.8	6.73	1.00632	0.975393	1.00382	0.99847	1.01048	0.967199	1.03151	0.992851	1.0265	Quantified
ENSRNOP00000024775	guanine deaminase	Gda	pep chromosome:Rnor_6.0:1:238982392:239057732:-1 gene:ENSRNOG00000018282.6 transcript:ENSRNOT00000024775.5 gene_biotype:protein_coding transcript_biotype:protein_coding gene_symbol:Gda description:guanine deaminase [Source:RGD Symbol;Acc:621617]	47	22	22	46	454	50.9	5.72	0.979425	1.01208	0.922321	0.998113	1.06671	1.13037	0.974987	1.03887	0.895127	Quantified
ENSRNOP00000011208	transgelin 2	Tagln2	pep chromosome:Rnor_6.0:13:90807199:90814119:-1 gene:ENSRNOG00000008301.7 transcript:ENSRNOT00000011208.7 gene_biotype:protein_coding transcript_biotype:protein_coding gene_symbol:Tagln2 description:transgelin 2 [Source:RGD Symbol;Acc:1310840]	62	11	11	77	199	22.4	8.25	1.08729	1.0782	0.998424	0.97175	0.952869	0.946441	0.99569	1.00509	0.975654	Quantified
ENSRNOP00000069838	adaptor related protein complex 3 subunit beta 1	Ap3b1	pep chromosome:Rnor_6.0:2:24024791:24226224:1 gene:ENSRNOG00000010624.6 transcript:ENSRNOT00000089599.1 gene_biotype:protein_coding transcript_biotype:protein_coding gene_symbol:Ap3b1 description:adaptor related protein complex 3 subunit beta 1 [Source:RGD Symbol;Acc:1310256]	23	24	24	55	1096	121.4	6	0.978602	0.991496	0.97809	1.01556	0.999542	1.00901	0.999172	1.04465	0.999384	Quantified
ENSRNOP00000013166	SWI/SNF related, matrix associated, actin dependent regulator of chromatin, subfamily a, member 4	Smarca4	pep chromosome:Rnor_6.0:8:22648323:22739468:1 gene:ENSRNOG00000009271.6 transcript:ENSRNOT00000013165.6 gene_biotype:protein_coding transcript_biotype:protein_coding gene_symbol:Smarca4 description:SWI/SNF related, matrix associated, actin dependent regulator of chromatin, subfamily a, member 4 [Source:RGD Symbol;Acc:621728]	15	13	23	32	1613	181.3	8	1.01273	0.999939	1.01805	1.01889	1.00265	0.964503	1.01567	0.974984	1.00494	Quantified
ENSRNOP00000074098	PPFIA binding protein 1	Ppfibp1	pep chromosome:Rnor_6.0:4:181286455:181428152:1 gene:ENSRNOG00000031709.5 transcript:ENSRNOT00000083633.1 gene_biotype:protein_coding transcript_biotype:protein_coding gene_symbol:Ppfibp1 description:PPFIA binding protein 1 [Source:RGD Symbol;Acc:1310010]	24	21	21	32	1032	116	5.71	1.01566	1.00592	0.96677	0.989277	1.02543	1.01499	1.01991	1.01693	0.958854	Quantified
ENSRNOP00000018325	glutathione S-transferase alpha 1	Gsta1	pep chromosome:Rnor_6.0:9:27436258:27452902:-1 gene:ENSRNOG00000013484.5 transcript:ENSRNOT00000018325.4 gene_biotype:protein_coding transcript_biotype:protein_coding gene_symbol:Gsta1 description:glutathione S-transferase alpha 1 [Source:RGD Symbol;Acc:2753]	52	9	14	142	221	25.3	8.75	0.928118	1.05572	0.988623	1.0762	1.0196	0.832957	1.02355	1.04957	1.03708	Quantified
ENSRNOP00000020785	ubiquitin specific peptidase 5	Usp5	pep chromosome:Rnor_6.0:4:157332740:157347803:-1 gene:ENSRNOG00000015409.5 transcript:ENSRNOT00000020785.5 gene_biotype:protein_coding transcript_biotype:protein_coding gene_symbol:Usp5 description:ubiquitin specific peptidase 5 [Source:RGD Symbol;Acc:1308438]	24	18	18	53	858	95.7	5.01	0.991809	1.00566	1.00354	1.03277	1.0049	0.990408	1.00082	0.994894	0.989151	Quantified
ENSRNOP00000071054	scaffold attachment factor B	Safb	pep chromosome:Rnor_6.0:9:10450205:10471176:-1 gene:ENSRNOG00000050543.2 transcript:ENSRNOT00000089164.1 gene_biotype:protein_coding transcript_biotype:protein_coding gene_symbol:Safb description:scaffold attachment factor B [Source:RGD Symbol;Acc:620613]	19	16	22	44	940	105.5	5.36	0.967057	0.995233	1.03606	1.0083	1.05093	0.95484	0.967438	0.999107	1.03409	Quantified
ENSRNOP00000072449	biglycan	Bgn	pep chromosome:Rnor_6.0:X:157319046:157331204:-1 gene:ENSRNOG00000055962.1 transcript:ENSRNOT00000085201.1 gene_biotype:protein_coding transcript_biotype:protein_coding gene_symbol:Bgn description:biglycan [Source:RGD Symbol;Acc:2207]	39	12	13	102	369	41.7	7.52	0.919986	1.06985	0.945293	1.00658	1.01466	1.01697	1.05146	0.999997	0.990908	Quantified
ENSRNOP00000022540	leucine zipper and EF-hand containing transmembrane protein 1	Letm1	pep chromosome:Rnor_6.0:14:82227708:82267350:1 gene:ENSRNOG00000016427.6 transcript:ENSRNOT00000022540.6 gene_biotype:protein_coding transcript_biotype:protein_coding gene_symbol:Letm1 description:leucine zipper and EF-hand containing transmembrane protein 1 [Source:RGD Symbol;Acc:1359678]	33	22	22	47	739	83	6.6	0.984926	0.986841	0.975519	0.980833	1.00233	1.01897	1.02883	1.00294	1.03372	Quantified
ENSRNOP00000031153	huntingtin interacting protein 1	Hip1	pep chromosome:Rnor_6.0:12:24180937:24315373:1 gene:ENSRNOG00000001448.5 transcript:ENSRNOT00000030497.4 gene_biotype:protein_coding transcript_biotype:protein_coding gene_symbol:Hip1 description:huntingtin interacting protein 1 [Source:RGD Symbol;Acc:620305]	23	24	25	28	1030	114.9	5.41	1.02726	1.01178	0.980989	0.992678	0.985194	0.996022	1.00199	1.0087	1.00939	Quantified
ENSRNOP00000074724	N-acylsphingosine amidohydrolase 1	Asah1	pep chromosome:Rnor_6.0:16:53998560:54040836:1 gene:ENSRNOG00000010034.5 transcript:ENSRNOT00000077188.1 gene_biotype:protein_coding transcript_biotype:protein_coding gene_symbol:Asah1 description:N-acylsphingosine amidohydrolase 1 [Source:RGD Symbol;Acc:621568]	34	15	15	64	428	48.3	9.17	1.00322	0.943853	0.874193	0.907429	0.998546	1.04784	1.09869	1.04264	1.09958	Quantified
ENSRNOP00000024161	serpin family B member 6A	Serpinb6a	pep chromosome:Rnor_6.0:17:32190801:32209590:1 gene:ENSRNOG00000017962.5 transcript:ENSRNOT00000024161.5 gene_biotype:protein_coding transcript_biotype:protein_coding gene_symbol:Serpinb6a description:serpin family B member 6A [Source:RGD Symbol;Acc:735108]	38	13	14	56	379	43	6.1	0.987673	1.04764	1.00909	1.00452	1.00094	0.979288	1.00823	0.989658	0.986294	Quantified
ENSRNOP00000024568	SWI/SNF related, matrix associated, actin dependent regulator of chromatin, subfamily a, member 5	Smarca5	pep chromosome:Rnor_6.0:19:30936703:30969454:1 gene:ENSRNOG00000018149.5 transcript:ENSRNOT00000024568.5 gene_biotype:protein_coding transcript_biotype:protein_coding gene_symbol:Smarca5 description:SWI/SNF related, matrix associated, actin dependent regulator of chromatin, subfamily a, member 5 [Source:RGD Symbol;Acc:1308832]	23	17	24	40	995	116.6	8.41	1.03806	1.01586	0.996733	1.01722	0.974031	0.967856	1.01755	0.951993	1.03333	Quantified
ENSRNOP00000064933	serine and arginine rich splicing factor 1	Srsf1	pep chromosome:Rnor_6.0:10:75335146:75341197:1 gene:ENSRNOG00000050323.1 transcript:ENSRNOT00000073005.1 gene_biotype:protein_coding transcript_biotype:protein_coding gene_symbol:Srsf1 description:serine and arginine rich splicing factor 1 [Source:RGD Symbol;Acc:1587490]	56	15	16	96	248	27.7	10.36	1.01664	0.996006	0.995566	0.982631	1.00171	0.928311	1.04172	0.982564	1.0663	Quantified
ENSRNOP00000028315	ferritin light chain 1-like	LOC100360087	pep chromosome:Rnor_6.0:1:101448346:101449829:-1 gene:ENSRNOG00000020843.6 transcript:ENSRNOT00000028315.6 gene_biotype:protein_coding transcript_biotype:protein_coding gene_symbol:LOC100360087 description:ferritin light chain 1-like [Source:RGD Symbol;Acc:2322860]	69	9	9	67	183	20.7	6.43	0.954679	0.975566	0.952788	1.02219	1.03014	1.05642	1.05143	1.034	0.938663	Quantified
ENSRNOP00000071398	glutaminyl-tRNA synthetase 1	Qars1	pep chromosome:Rnor_6.0:8:117297670:117305702:1 gene:ENSRNOG00000060912.1 transcript:ENSRNOT00000082628.1 gene_biotype:protein_coding transcript_biotype:protein_coding gene_symbol:Qars1 description:glutaminyl-tRNA synthetase 1 [Source:RGD Symbol;Acc:1359448]	32	22	23	37	775	87.6	7.31	1.00796	0.999911	0.993549	0.990594	0.993549	0.997645	1.01124	1.00621	1.01333	Quantified
ENSRNOP00000029969	dystrophin	Dmd	pep chromosome:Rnor_6.0:X:51286737:53519259:1 gene:ENSRNOG00000046366.2 transcript:ENSRNOT00000035692.6 gene_biotype:protein_coding transcript_biotype:protein_coding gene_symbol:Dmd description:dystrophin [Source:RGD Symbol;Acc:2507]	7	24	28	34	3677	425.6	5.91	0.982397	1.08483	0.97831	1.02126	1.03282	0.947945	1.02705	1.01473	0.922673	Quantified
ENSRNOP00000015420	sterol carrier protein 2	Scp2	pep chromosome:Rnor_6.0:5:127647934:127735703:-1 gene:ENSRNOG00000011413.7 transcript:ENSRNOT00000015420.5 gene_biotype:protein_coding transcript_biotype:protein_coding gene_symbol:Scp2 description:sterol carrier protein 2 [Source:RGD Symbol;Acc:3642]	25	13	17	68	547	58.7	7.03	1.07423	0.958646	1.01568	1.04196	0.960811	1.01201	0.979719	0.986689	0.984077	Quantified
ENSRNOP00000061588	ER membrane protein complex subunit 1	Emc1	pep chromosome:Rnor_6.0:5:157820908:157846226:1 gene:ENSRNOG00000018097.6 transcript:ENSRNOT00000068168.2 gene_biotype:protein_coding transcript_biotype:protein_coding gene_symbol:Emc1 description:ER membrane protein complex subunit 1 [Source:RGD Symbol;Acc:1310427]	22	21	21	31	993	111.1	7.31	0.994485	0.965206	0.980489	0.964349	0.993682	1.01061	1.00446	1.05412	1.04793	Quantified
ENSRNOP00000033812	poly (ADP-ribose) polymerase family, member 9	Parp9	pep chromosome:Rnor_6.0:11:67724076:67756799:-1 gene:ENSRNOG00000023463.5 transcript:ENSRNOT00000030975.5 gene_biotype:protein_coding transcript_biotype:protein_coding gene_symbol:Parp9 description:poly (ADP-ribose) polymerase family, member 9 [Source:RGD Symbol;Acc:1307534]	27	16	16	28	830	92.2	6.93	1.03652	1.00031	0.999226	0.983737	0.964426	1.07774	0.993002	0.981521	0.979339	Quantified
ENSRNOP00000042824	phospholipase C, delta 1	Plcd1	pep chromosome:Rnor_6.0:8:127753539:127782070:-1 gene:ENSRNOG00000032238.5 transcript:ENSRNOT00000045493.5 gene_biotype:protein_coding transcript_biotype:protein_coding gene_symbol:Plcd1 description:phospholipase C, delta 1 [Source:RGD Symbol;Acc:3346]	29	20	20	42	756	85.9	6.34	0.929994	1.01403	0.888089	0.962063	1.0083	1.03525	1.0317	1.05149	1.09714	Quantified
ENSRNOP00000075324	hydroxy-delta-5-steroid dehydrogenase, 3 beta- and steroid delta-isomerase 3	Hsd3b3	pep chromosome:Rnor_6.0:2:200756898:200762206:-1 gene:ENSRNOG00000042884.4 transcript:ENSRNOT00000086835.1 gene_biotype:protein_coding transcript_biotype:protein_coding gene_symbol:Hsd3b3 description:hydroxy-delta-5-steroid dehydrogenase, 3 beta- and steroid delta-isomerase 3 [Source:RGD Symbol;Acc:1592771]	35	4	9	131	354	40	8.44	0.920298	0.911627	0.998777	0.939821	1.0869	1.03806	1.02849	0.996784	1.09452	Quantified
ENSRNOP00000028687	peroxiredoxin 5	Prdx5	pep chromosome:Rnor_6.0:1:222164462:222167447:-1 gene:ENSRNOG00000021125.8 transcript:ENSRNOT00000028687.3 gene_biotype:protein_coding transcript_biotype:protein_coding gene_symbol:Prdx5 description:peroxiredoxin 5 [Source:RGD Symbol;Acc:71007]	47	10	10	69	213	22.2	8.66	0.979394	0.980126	1.00038	0.956247	0.958362	1.18929	0.941293	0.994519	1.02146	Quantified
ENSRNOP00000001911	G protein subunit beta 2	Gnb2	pep chromosome:Rnor_6.0:12:22229079:22234096:1 gene:ENSRNOG00000001409.4 transcript:ENSRNOT00000001911.4 gene_biotype:protein_coding transcript_biotype:protein_coding gene_symbol:Gnb2 description:G protein subunit beta 2 [Source:RGD Symbol;Acc:69319]	42	4	12	63	340	37.3	6	0.997523	1.02519	0.977348	0.999741	1.02286	0.964685	1.01985	0.978919	1.02672	Quantified
ENSRNOP00000046427		AABR07007121.1	pep chromosome:Rnor_6.0:1:282063929:282064741:1 gene:ENSRNOG00000033843.3 transcript:ENSRNOT00000041410.3 gene_biotype:protein_coding transcript_biotype:protein_coding gene_symbol:AABR07007121.1	39	14	14	91	270	30.5	10.61	1.06462	1.00978	0.99621	1.0162	0.943676	0.993128	0.99302	0.980104	1.01703	Quantified
ENSRNOP00000063624	protein arginine methyltransferase 1	Prmt1	pep chromosome:Rnor_6.0:1:100971273:100980340:-1 gene:ENSRNOG00000026109.6 transcript:ENSRNOT00000064272.3 gene_biotype:protein_coding transcript_biotype:protein_coding gene_symbol:Prmt1 description:protein arginine methyltransferase 1 [Source:RGD Symbol;Acc:62020]	48	16	16	43	353	40.5	5.6	0.987028	0.972527	1.03665	1.02725	1.01427	0.98881	0.994664	0.998819	0.993552	Quantified
ENSRNOP00000009563	NOP56 ribonucleoprotein	Nop56	pep chromosome:Rnor_6.0:3:122803772:122808558:1 gene:ENSRNOG00000007128.5 transcript:ENSRNOT00000009564.5 gene_biotype:protein_coding transcript_biotype:protein_coding gene_symbol:Nop56 description:NOP56 ribonucleoprotein [Source:RGD Symbol;Acc:1308892]	29	16	16	51	588	65.4	9.01	0.97881	0.982088	1.00662	1.00829	0.991155	0.984207	1.02381	1.00542	1.03369	Quantified
ENSRNOP00000070202	adaptor related protein complex 2 subunit mu 1	Ap2m1	pep chromosome:Rnor_6.0:11:84041630:84047497:-1 gene:ENSRNOG00000001709.7 transcript:ENSRNOT00000088821.1 gene_biotype:protein_coding transcript_biotype:protein_coding gene_symbol:Ap2m1 description:adaptor related protein complex 2 subunit mu 1 [Source:RGD Symbol;Acc:620135]	50	20	20	42	435	49.6	9.54	1.02349	1.0377	0.983255	0.989814	0.967874	0.989384	0.997403	1.00822	1.01705	Quantified
ENSRNOP00000003173	heterogeneous nuclear ribonucleoprotein D	Hnrnpd	pep chromosome:Rnor_6.0:14:11256268:11274578:1 gene:ENSRNOG00000002292.8 transcript:ENSRNOT00000003173.7 gene_biotype:protein_coding transcript_biotype:protein_coding gene_symbol:Hnrnpd description:heterogeneous nuclear ribonucleoprotein D [Source:RGD Symbol;Acc:620365]	34	1	13	76	334	36	8.1	1.03642	1.08567	0.950059	1.01634	1.00331	0.840813	1.07188	0.967762	1.03633	Quantified
ENSRNOP00000003437	PDS5 cohesin associated factor A	Pds5a	pep chromosome:Rnor_6.0:14:44185446:44280079:1 gene:ENSRNOG00000002541.6 transcript:ENSRNOT00000003437.6 gene_biotype:protein_coding transcript_biotype:protein_coding gene_symbol:Pds5a description:PDS5 cohesin associated factor A [Source:RGD Symbol;Acc:1307094]	17	18	22	34	1333	150.2	7.93	1.04378	1.03528	1.02413	1.02233	0.9534	0.953721	0.990458	0.978216	1.01125	Quantified
ENSRNOP00000024517	NADH:ubiquinone oxidoreductase core subunit V1	Ndufv1	pep chromosome:Rnor_6.0:1:219254279:219259448:-1 gene:ENSRNOG00000018117.6 transcript:ENSRNOT00000024517.6 gene_biotype:protein_coding transcript_biotype:protein_coding gene_symbol:Ndufv1 description:NADH:ubiquinone oxidoreductase core subunit V1 [Source:RGD Symbol;Acc:1359247]	46	17	17	34	464	50.7	8.07	0.9835	0.994843	0.966251	1.01554	1.00796	0.938485	0.995686	1.03495	1.07681	Quantified
ENSRNOP00000003320	niban apoptosis regulator 1	Niban1	pep chromosome:Rnor_6.0:13:68949665:69101588:1 gene:ENSRNOG00000002403.6 transcript:ENSRNOT00000003320.6 gene_biotype:protein_coding transcript_biotype:protein_coding gene_symbol:Niban1 description:niban apoptosis regulator 1 [Source:RGD Symbol;Acc:71088]	20	20	20	52	937	103.4	4.7	1.06238	0.980221	0.996122	0.992727	0.9714	1.03363	0.998761	0.958073	1.02084	Quantified
ENSRNOP00000013612	thioredoxin reductase 1	Txnrd1	pep chromosome:Rnor_6.0:7:26946125:26984400:-1 gene:ENSRNOG00000009088.7 transcript:ENSRNOT00000013613.7 gene_biotype:protein_coding transcript_biotype:protein_coding gene_symbol:Txnrd1 description:thioredoxin reductase 1 [Source:RGD Symbol;Acc:61959]	30	13	14	32	498	54.5	6.47	0.999249	1.04524	0.958915	0.988415	0.971121	0.99121	1.00737	1.03289	1.02061	Quantified
ENSRNOP00000074720	mannosyl-oligosaccharide glucosidase	LOC103692171	pep chromosome:Rnor_6.0:4:114814056:114817465:1 gene:ENSRNOG00000054176.1 transcript:ENSRNOT00000083560.1 gene_biotype:protein_coding transcript_biotype:protein_coding gene_symbol:LOC103692171 description:mannosyl-oligosaccharide glucosidase [Source:RGD Symbol;Acc:9236907]	30	22	22	41	834	91.9	9.11	0.971165	0.983227	1.00691	1.0167	1.01159	0.993771	0.997014	1.00652	1.02773	Quantified
ENSRNOP00000005370	profilin 1	Pfn1	pep chromosome:Rnor_6.0:10:57273005:57275708:-1 gene:ENSRNOG00000003975.6 transcript:ENSRNOT00000005370.6 gene_biotype:protein_coding transcript_biotype:protein_coding gene_symbol:Pfn1 description:profilin 1 [Source:RGD Symbol;Acc:621825]	72	9	9	113	140	14.9	8.28	1.07937	1.08834	0.963992	1.00273	0.943699	0.961003	0.982422	1.01378	0.977661	Quantified
ENSRNOP00000073166	general transcription factor II I	Gtf2i	pep chromosome:Rnor_6.0:12:25411207:25488156:1 gene:ENSRNOG00000001479.9 transcript:ENSRNOT00000077189.1 gene_biotype:protein_coding transcript_biotype:protein_coding gene_symbol:Gtf2i description:general transcription factor II I [Source:RGD Symbol;Acc:727961]	23	24	24	46	999	112.2	6.39	1.02959	0.979132	1.03957	1.02185	1.01305	0.972464	1.00286	0.979592	0.973758	Quantified
ENSRNOP00000070805	solute carrier family 25 member 3	Slc25a3	pep chromosome:Rnor_6.0:7:31816606:31824071:-1 gene:ENSRNOG00000008289.7 transcript:ENSRNOT00000080824.1 gene_biotype:protein_coding transcript_biotype:protein_coding gene_symbol:Slc25a3 description:solute carrier family 25 member 3 [Source:RGD Symbol;Acc:70986]	36	15	15	102	357	39.6	9.29	0.985013	0.96174	0.937268	0.914457	0.986898	1.02943	1.06439	1.02958	1.10691	Quantified
ENSRNOP00000004911	non-POU domain containing, octamer-binding	Nono	pep chromosome:Rnor_6.0:X:71324365:71342225:1 gene:ENSRNOG00000003689.6 transcript:ENSRNOT00000004911.5 gene_biotype:protein_coding transcript_biotype:protein_coding gene_symbol:Nono description:non-POU domain containing, octamer-binding [Source:RGD Symbol;Acc:1549738]	30	17	18	78	476	54.9	8.95	1.00627	0.997654	1.03534	1.0099	1.0032	0.977982	1.00645	0.986775	0.989101	Quantified
ENSRNOP00000026197	voltage-dependent anion channel 3	Vdac3	pep chromosome:Rnor_6.0:16:74292438:74308903:1 gene:ENSRNOG00000019277.8 transcript:ENSRNOT00000026197.6 gene_biotype:protein_coding transcript_biotype:protein_coding gene_symbol:Vdac3 description:voltage-dependent anion channel 3 [Source:RGD Symbol;Acc:621577]	61	12	13	72	283	30.8	8.59	0.988989	0.936247	0.985591	0.948205	0.990223	1.00241	1.03596	1.02538	1.1018	Quantified
ENSRNOP00000024793	DEAD-box helicase 19B	Ddx19b	pep chromosome:Rnor_6.0:19:43251539:43271865:1 gene:ENSRNOG00000018033.7 transcript:ENSRNOT00000024793.7 gene_biotype:protein_coding transcript_biotype:protein_coding gene_symbol:Ddx19b description:DEAD-box helicase 19B [Source:RGD Symbol;Acc:1593382]	41	18	18	29	478	53.9	6.74	1.01672	1.05609	1.00835	1.02534	0.990891	0.974892	0.975071	0.999274	0.966743	Quantified
ENSRNOP00000010674	tyrosyl-tRNA synthetase 1	Yars1	pep chromosome:Rnor_6.0:5:147375350:147403571:1 gene:ENSRNOG00000007213.5 transcript:ENSRNOT00000010674.5 gene_biotype:protein_coding transcript_biotype:protein_coding gene_symbol:Yars1 description:tyrosyl-tRNA synthetase 1 [Source:RGD Symbol;Acc:1307616]	40	23	23	33	564	63	8.44	1.01707	1.00319	1.01049	0.995833	0.979581	1.01938	0.993937	1.0038	0.991246	Quantified
ENSRNOP00000015931	ATPase H+ transporting V1 subunit B2	Atp6v1b2	pep chromosome:Rnor_6.0:16:22326529:22350155:-1 gene:ENSRNOG00000011891.6 transcript:ENSRNOT00000015931.6 gene_biotype:protein_coding transcript_biotype:protein_coding gene_symbol:Atp6v1b2 description:ATPase H+ transporting V1 subunit B2 [Source:RGD Symbol;Acc:620284]	40	16	16	46	511	56.5	5.81	1.00831	1.00712	0.959205	0.957417	0.98227	1.04533	0.998383	1.00596	1.05215	Quantified
ENSRNOP00000073179	interleukin enhancer binding factor 3	Ilf3	pep chromosome:Rnor_6.0:8:22423467:22440659:1 gene:ENSRNOG00000022741.6 transcript:ENSRNOT00000085320.1 gene_biotype:protein_coding transcript_biotype:protein_coding gene_symbol:Ilf3 description:interleukin enhancer binding factor 3 [Source:RGD Symbol;Acc:619734]	25	18	20	41	915	98	8.78	0.975167	0.998598	0.979245	1.02989	0.995946	0.962513	0.995416	1.02658	1.05134	Quantified
ENSRNOP00000072791	O-linked N-acetylglucosamine (GlcNAc) transferase	Ogt	pep chromosome:Rnor_6.0:X:71540929:71585908:1 gene:ENSRNOG00000003359.7 transcript:ENSRNOT00000082967.1 gene_biotype:protein_coding transcript_biotype:protein_coding gene_symbol:Ogt description:O-linked N-acetylglucosamine (GlcNAc) transferase [Source:RGD Symbol;Acc:62060]	22	18	18	23	1046	116.9	6.7	1.03031	1.02794	0.993377	0.993939	0.976989	0.971298	0.980509	1.04358	0.995769	Quantified
ENSRNOP00000020544	electron transfer flavoprotein subunit alpha	Etfa	pep chromosome:Rnor_6.0:8:60028789:60086403:-1 gene:ENSRNOG00000015233.7 transcript:ENSRNOT00000020544.7 gene_biotype:protein_coding transcript_biotype:protein_coding gene_symbol:Etfa description:electron transfer flavoprotein subunit alpha [Source:RGD Symbol;Acc:628747]	54	15	15	61	333	34.9	8.38	0.902703	1.04829	1.01504	0.961759	0.960726	0.977497	1.06957	1.00352	1.07582	Quantified
ENSRNOP00000072654	archain 1	Arcn1	pep chromosome:Rnor_6.0:8:49051246:49075892:-1 gene:ENSRNOG00000061108.1 transcript:ENSRNOT00000082687.1 gene_biotype:protein_coding transcript_biotype:protein_coding gene_symbol:Arcn1 description:archain 1 [Source:RGD Symbol;Acc:1359110]	28	18	18	45	511	57.2	6.21	1.05264	1.01199	1.01146	1.01505	0.966381	0.979932	0.987579	0.985401	1.00266	Quantified
ENSRNOP00000025925	ST13, Hsp70 interacting protein	St13	pep chromosome:Rnor_6.0:7:122585771:122635731:-1 gene:ENSRNOG00000019070.4 transcript:ENSRNOT00000025925.3 gene_biotype:protein_coding transcript_biotype:protein_coding gene_symbol:St13 description:ST13, Hsp70 interacting protein [Source:RGD Symbol;Acc:621312]	36	15	15	77	368	41.3	5.39	0.996726	0.985095	0.999237	0.97867	0.981562	1.04319	1.00481	1.01546	1.01089	Quantified
ENSRNOP00000057188	eukaryotic translation initiation factor 3, subunit B	Eif3b	pep chromosome:Rnor_6.0:12:16285733:16310190:-1 gene:ENSRNOG00000001253.6 transcript:ENSRNOT00000060444.1 gene_biotype:protein_coding transcript_biotype:protein_coding gene_symbol:Eif3b description:eukaryotic translation initiation factor 3, subunit B [Source:RGD Symbol;Acc:1309018]	25	19	19	57	797	90.9	5.08	0.994959	0.992021	0.982524	1.00399	0.998206	0.990976	1.00454	1.01266	1.03463	Quantified
ENSRNOP00000016184	RBMX like 1	Rbmxl1	pep chromosome:Rnor_6.0:19:33083412:33084915:1 gene:ENSRNOG00000012138.7 transcript:ENSRNOT00000016184.7 gene_biotype:protein_coding transcript_biotype:protein_coding gene_symbol:Rbmxl1 description:RBMX like 1 [Source:RGD Symbol;Acc:1306751]	44	5	20	62	368	40	9.83	0.954011	0.896789	1.03716	1.01943	1.0313	0.9491	1.0457	0.979625	1.09958	Quantified
ENSRNOP00000018960	epidermal growth factor receptor pathway substrate 15-like 1	Eps15l1	pep chromosome:Rnor_6.0:16:19127724:19203003:1 gene:ENSRNOG00000013502.7 transcript:ENSRNOT00000018960.7 gene_biotype:protein_coding transcript_biotype:protein_coding gene_symbol:Eps15l1 description:epidermal growth factor receptor pathway substrate 15-like 1 [Source:RGD Symbol;Acc:1565708]	29	21	21	36	909	99.4	5.02	1.01253	0.981838	0.99147	0.976001	1.00382	1.06359	1.003	0.99026	0.992871	Quantified
ENSRNOP00000009634	xanthine dehydrogenase	Xdh	pep chromosome:Rnor_6.0:6:25149235:25211494:-1 gene:ENSRNOG00000007081.6 transcript:ENSRNOT00000009634.6 gene_biotype:protein_coding transcript_biotype:protein_coding gene_symbol:Xdh description:xanthine dehydrogenase [Source:RGD Symbol;Acc:62043]	19	22	23	58	1331	146.2	7.25	0.986081	1.01816	1.0276	0.993632	1.02275	1.05071	0.999469	0.995348	0.920687	Quantified
ENSRNOP00000005665	ATP-binding cassette, subfamily A (ABC1), member 8a	Abca8a	pep chromosome:Rnor_6.0:10:98319487:98388637:-1 gene:ENSRNOG00000004147.7 transcript:ENSRNOT00000005665.6 gene_biotype:protein_coding transcript_biotype:protein_coding gene_symbol:Abca8a description:ATP-binding cassette, subfamily A (ABC1), member 8a [Source:RGD Symbol;Acc:1307333]	17	22	27	38	1624	184.8	7.25	0.977798	1.03171	0.943566	0.97776	1.0249	0.977519	1.0152	1.01542	1.05047	Quantified
ENSRNOP00000054331	vacuolar protein sorting 13 homolog C	Vps13c	pep chromosome:Rnor_6.0:8:73682887:73842928:1 gene:ENSRNOG00000030213.6 transcript:ENSRNOT00000057522.4 gene_biotype:protein_coding transcript_biotype:protein_coding gene_symbol:Vps13c description:vacuolar protein sorting 13 homolog C [Source:RGD Symbol;Acc:1560364]	8	28	28	32	3739	418.4	6.84	0.981981	1.00141	0.995313	0.979596	1.02324	1.02567	1.01155	1.02169	0.974108	Quantified
ENSRNOP00000074800	kinesin family member 13B	Kif13b	pep chromosome:Rnor_6.0:15:48030973:48189951:1 gene:ENSRNOG00000013089.7 transcript:ENSRNOT00000085487.1 gene_biotype:protein_coding transcript_biotype:protein_coding gene_symbol:Kif13b description:kinesin family member 13B [Source:RGD Symbol;Acc:1303307]	15	22	26	31	1843	204.7	5.8	0.993328	0.974608	0.984089	0.988392	0.998308	1.01759	1.01438	1.01452	1.02979	Quantified
ENSRNOP00000038065	ribosomal protein L6	Rpl6	pep chromosome:Rnor_6.0:12:40877613:40881124:-1 gene:ENSRNOG00000025936.5 transcript:ENSRNOT00000034951.5 gene_biotype:protein_coding transcript_biotype:protein_coding gene_symbol:Rpl6 description:ribosomal protein L6 [Source:RGD Symbol;Acc:619826]	45	4	17	84	298	33.5	10.74	1.04374	0.971643	1.03703	0.944017	0.976348	1.0142	1.0312	0.971596	1.02292	Quantified
ENSRNOP00000072176	aspartate-beta-hydroxylase	Asph	pep chromosome:Rnor_6.0:5:22578943:22770008:-1 gene:ENSRNOG00000007445.8 transcript:ENSRNOT00000083779.1 gene_biotype:protein_coding transcript_biotype:protein_coding gene_symbol:Asph description:aspartate-beta-hydroxylase [Source:RGD Symbol;Acc:1312000]	22	18	18	33	789	89.5	4.84	0.977986	0.996005	0.985648	1.00847	1.02055	1.02938	1.01414	1.01673	0.966032	Quantified
ENSRNOP00000066502	prohibitin	Phb	pep chromosome:Rnor_6.0:10:83476107:83488878:1 gene:ENSRNOG00000046799.2 transcript:ENSRNOT00000075733.2 gene_biotype:protein_coding transcript_biotype:protein_coding gene_symbol:Phb description:prohibitin [Source:RGD Symbol;Acc:3322]	55	15	15	62	272	29.8	5.76	0.960502	0.945709	0.939929	0.952824	1.01021	1.0327	1.03119	1.01762	1.126	Quantified
ENSRNOP00000023350	sorbitol dehydrogenase	Sord	pep chromosome:Rnor_6.0:3:114176309:114207366:1 gene:ENSRNOG00000017291.6 transcript:ENSRNOT00000023350.6 gene_biotype:protein_coding transcript_biotype:protein_coding gene_symbol:Sord description:sorbitol dehydrogenase [Source:RGD Symbol;Acc:3734]	52	16	16	58	357	38.2	7.44	0.916294	1.02087	0.941262	0.904011	0.984273	1.08071	1.11662	0.987972	1.06485	Quantified
ENSRNOP00000017472	prohibitin 2	Phb2	pep chromosome:Rnor_6.0:4:157230895:157235051:1 gene:ENSRNOG00000012999.7 transcript:ENSRNOT00000017472.7 gene_biotype:protein_coding transcript_biotype:protein_coding gene_symbol:Phb2 description:prohibitin 2 [Source:RGD Symbol;Acc:620203]	54	17	17	65	299	33.3	9.83	0.950739	0.937944	0.964201	0.971053	1.01677	1.02707	1.0309	1.01026	1.1073	Quantified
ENSRNOP00000023641	NOP2/Sun RNA methyltransferase 2	Nsun2	pep chromosome:Rnor_6.0:1:36295650:36319896:-1 gene:ENSRNOG00000017254.6 transcript:ENSRNOT00000023641.6 gene_biotype:protein_coding transcript_biotype:protein_coding gene_symbol:Nsun2 description:NOP2/Sun RNA methyltransferase 2 [Source:RGD Symbol;Acc:1311954]	26	20	20	29	782	88	7.03	1.04421	0.989309	1.01398	1.01824	0.956454	1.0258	0.976954	0.989008	1.00091	Quantified
ENSRNOP00000066778	RNA binding motif protein 14	Rbm14	pep chromosome:Rnor_6.0:1:220056031:220067124:-1 gene:ENSRNOG00000045568.3 transcript:ENSRNOT00000072373.3 gene_biotype:protein_coding transcript_biotype:protein_coding gene_symbol:Rbm14 description:RNA binding motif protein 14 [Source:RGD Symbol;Acc:620542]	29	20	20	37	669	69.5	9.67	0.993775	1.01258	1.05101	1.02736	0.995045	0.979555	0.968467	1.0123	0.973539	Quantified
ENSRNOP00000015757	proteasome 26S subunit, ATPase 3	Psmc3	pep chromosome:Rnor_6.0:3:79876938:79882319:1 gene:ENSRNOG00000011414.5 transcript:ENSRNOT00000015757.3 gene_biotype:protein_coding transcript_biotype:protein_coding gene_symbol:Psmc3 description:proteasome 26S subunit, ATPase 3 [Source:RGD Symbol;Acc:61905]	43	17	17	51	442	49.5	5.19	0.993732	0.982903	0.99743	1.01529	0.993154	1.05122	0.979803	1.01801	0.984671	Quantified
ENSRNOP00000009666	proteasome 20S subunit alpha 6	Psma6	pep chromosome:Rnor_6.0:6:76188083:76205426:1 gene:ENSRNOG00000007114.6 transcript:ENSRNOT00000009666.6 gene_biotype:protein_coding transcript_biotype:protein_coding gene_symbol:Psma6 description:proteasome 20S subunit alpha 6 [Source:RGD Symbol;Acc:61849]	56	14	14	52	246	27.4	6.76	1.01829	1.01475	1.0226	1.01896	0.971318	0.960866	0.989198	0.982736	1.03448	Quantified
ENSRNOP00000024264	asparaginyl-tRNA synthetase 1	Nars1	pep chromosome:Rnor_6.0:18:59986360:60002569:-1 gene:ENSRNOG00000017852.8 transcript:ENSRNOT00000024264.8 gene_biotype:protein_coding transcript_biotype:protein_coding gene_symbol:Nars1 description:asparaginyl-tRNA synthetase 1 [Source:RGD Symbol;Acc:1307238]	30	6	16	37	558	64.1	5.86	1.00928	0.994307	1.01928	0.994062	0.990978	1.01065	0.988151	1.01461	0.992996	Quantified
ENSRNOP00000011991	cysteine and glycine-rich protein 1	Csrp1	pep chromosome:Rnor_6.0:13:52553775:52575051:1 gene:ENSRNOG00000008937.5 transcript:ENSRNOT00000011991.5 gene_biotype:protein_coding transcript_biotype:protein_coding gene_symbol:Csrp1 description:cysteine and glycine-rich protein 1 [Source:RGD Symbol;Acc:62053]	68	12	12	40	193	20.6	8.57	0.985524	1.14835	0.88396	1.03411	1.0079	0.920422	1.06287	1.00682	0.962527	Quantified
ENSRNOP00000072623	similar to histidine-rich glycoprotein	LOC681544	pep chromosome:Rnor_6.0:11:81621283:81639952:-1 gene:ENSRNOG00000001809.7 transcript:ENSRNOT00000081864.1 gene_biotype:protein_coding transcript_biotype:protein_coding gene_symbol:LOC681544 description:similar to histidine-rich glycoprotein [Source:RGD Symbol;Acc:1594092]	28	16	16	72	536	60.3	7.83	0.887406	0.846833	1.00952	1.03298	1.00036	1.17769	1.03963	0.960846	1.06563	Quantified
ENSRNOP00000006607	actin related protein 2	Actr2	pep chromosome:Rnor_6.0:14:104340434:104375649:-1 gene:ENSRNOG00000004959.7 transcript:ENSRNOT00000006607.5 gene_biotype:protein_coding transcript_biotype:protein_coding gene_symbol:Actr2 description:actin related protein 2 [Source:RGD Symbol;Acc:1310826]	33	12	12	60	394	44.7	6.74	1.02303	1.04033	0.999734	0.965729	0.967999	1.00204	1.02151	1.01651	0.976702	Quantified
ENSRNOP00000012661	tensin 3	Tns3	pep chromosome:Rnor_6.0:14:88673881:88886198:-1 gene:ENSRNOG00000025695.6 transcript:ENSRNOT00000012661.7 gene_biotype:protein_coding transcript_biotype:protein_coding gene_symbol:Tns3 description:tensin 3 [Source:RGD Symbol;Acc:1564174]	13	15	19	36	1526	164.7	6.9	1.06719	1.05387	0.957872	1.08061	0.971943	0.939105	0.993212	0.971018	0.97749	Quantified
ENSRNOP00000014833	nucleoporin 205	Nup205	pep chromosome:Rnor_6.0:4:62703779:62773923:1 gene:ENSRNOG00000010852.6 transcript:ENSRNOT00000014832.5 gene_biotype:protein_coding transcript_biotype:protein_coding gene_symbol:Nup205 description:nucleoporin 205 [Source:RGD Symbol;Acc:1309413]	12	24	24	41	2008	227.1	6.32	0.992465	0.992425	0.991669	0.990592	1.02384	0.964463	1.01812	1.0028	1.0366	Quantified
ENSRNOP00000024659	solute carrier family 27 member 1	Slc27a1	pep chromosome:Rnor_6.0:16:19999112:20016190:1 gene:ENSRNOG00000018170.4 transcript:ENSRNOT00000024659.4 gene_biotype:protein_coding transcript_biotype:protein_coding gene_symbol:Slc27a1 description:solute carrier family 27 member 1 [Source:RGD Symbol;Acc:620927]	34	18	20	46	646	71.3	8.46	0.944914	0.925419	0.933505	0.975083	0.929014	0.985801	1.1136	1.06561	1.1434	Quantified
ENSRNOP00000028431	calpain 1	Capn1	pep chromosome:Rnor_6.0:1:221346066:221370322:-1 gene:ENSRNOG00000020935.6 transcript:ENSRNOT00000028431.6 gene_biotype:protein_coding transcript_biotype:protein_coding gene_symbol:Capn1 description:calpain 1 [Source:RGD Symbol;Acc:2267]	29	18	19	59	713	82	5.64	1.02834	0.998473	1.02339	0.99162	0.985359	1.00888	0.993593	1.00282	0.981198	Quantified
ENSRNOP00000015496	STE20-like kinase	Slk	pep chromosome:Rnor_6.0:1:267359830:267412810:1 gene:ENSRNOG00000011339.6 transcript:ENSRNOT00000015495.5 gene_biotype:protein_coding transcript_biotype:protein_coding gene_symbol:Slk description:STE20-like kinase [Source:RGD Symbol;Acc:3780]	20	22	23	31	1203	137.6	5.02	1.03981	1.02193	1.00955	0.996309	0.986519	1.00485	0.995828	0.964774	0.993717	Quantified
ENSRNOP00000025657	glutathione synthetase	Gss	pep chromosome:Rnor_6.0:3:151076254:151106557:-1 gene:ENSRNOG00000018964.2 transcript:ENSRNOT00000025657.2 gene_biotype:protein_coding transcript_biotype:protein_coding gene_symbol:Gss description:glutathione synthetase [Source:RGD Symbol;Acc:2752]	43	21	21	37	474	52.3	5.67	0.978284	0.994337	0.999778	0.970279	1.01008	1.04522	0.986283	1.03088	1.00074	Quantified
ENSRNOP00000068594	histone cluster 1 H2B family member o	Hist1h2bo	pep chromosome:Rnor_6.0:17:44756557:44758170:-1 gene:ENSRNOG00000054296.1 transcript:ENSRNOT00000091176.1 gene_biotype:protein_coding transcript_biotype:protein_coding gene_symbol:Hist1h2bo description:histone cluster 1 H2B family member o [Source:RGD Symbol;Acc:1311828]	54	3	9	489	138	15.5	10.24	1.01119	0.996769	1.03019	0.954693	1.01922	0.845794	1.05809	0.947566	1.14492	Quantified
ENSRNOP00000036514	ribosomal protein L5	Rpl5	pep chromosome:Rnor_6.0:14:2860965:2867397:-1 gene:ENSRNOG00000023529.3 transcript:ENSRNOT00000030428.3 gene_biotype:protein_coding transcript_biotype:protein_coding gene_symbol:Rpl5 description:ribosomal protein L5 [Source:RGD Symbol;Acc:619825]	48	14	14	50	297	34.4	9.74	1.06862	0.98747	0.997325	1.00834	0.985804	1.01988	1.00271	0.982193	0.960883	Quantified
ENSRNOP00000071972	glutaminase	Gls	pep chromosome:Rnor_6.0:9:54212767:54284872:1 gene:ENSRNOG00000056246.1 transcript:ENSRNOT00000090026.1 gene_biotype:protein_coding transcript_biotype:protein_coding gene_symbol:Gls description:glutaminase [Source:RGD Symbol;Acc:2707]	30	1	14	29	673	73.8	7.87	1.11745	1.00702	0.78678	0.849023	1.01758	0.955886	0.98585	1.00605	1.28888	Quantified
ENSRNOP00000009249	proteasome 26S subunit, non-ATPase 6	Psmd6	pep chromosome:Rnor_6.0:15:12407524:12416105:1 gene:ENSRNOG00000006751.5 transcript:ENSRNOT00000009249.5 gene_biotype:protein_coding transcript_biotype:protein_coding gene_symbol:Psmd6 description:proteasome 26S subunit, non-ATPase 6 [Source:RGD Symbol;Acc:735127]	51	20	20	41	389	45.6	5.52	0.990217	0.992132	0.969675	1.02683	1.00556	0.994671	1.01005	1.02435	1.00117	Quantified
ENSRNOP00000070305	B-cell receptor-associated protein 31	Bcap31	pep chromosome:Rnor_6.0:X:157095937:157126393:1 gene:ENSRNOG00000055756.1 transcript:ENSRNOT00000091792.1 gene_biotype:protein_coding transcript_biotype:protein_coding gene_symbol:Bcap31 description:B-cell receptor-associated protein 31 [Source:RGD Symbol;Acc:1302944]	36	16	16	48	245	27.9	8.88	1.01578	1.01207	0.977044	0.988045	1.01107	1.0054	1.00414	0.98823	1.01217	Quantified
ENSRNOP00000075190	RuvB-like AAA ATPase 1	Ruvbl1	pep chromosome:Rnor_6.0:4:120411991:120447455:1 gene:ENSRNOG00000013195.6 transcript:ENSRNOT00000090875.1 gene_biotype:protein_coding transcript_biotype:protein_coding gene_symbol:Ruvbl1 description:RuvB-like AAA ATPase 1 [Source:RGD Symbol;Acc:68373]	40	15	15	31	456	50.2	6.42	0.995686	1.00883	1.05164	1.01753	0.981289	0.947654	0.996605	0.997993	1.01538	Quantified
ENSRNOP00000051352	sorting nexin 2	Snx2	pep chromosome:Rnor_6.0:18:48132414:48173971:1 gene:ENSRNOG00000017832.6 transcript:ENSRNOT00000050631.4 gene_biotype:protein_coding transcript_biotype:protein_coding gene_symbol:Snx2 description:sorting nexin 2 [Source:RGD Symbol;Acc:1310291]	36	16	17	38	519	58.5	5.12	1.00109	1.03897	0.988051	1.00979	0.999098	0.969096	0.988539	1.00971	1.0094	Quantified
ENSRNOP00000024711	Parkinsonism associated deglycase	Park7	pep chromosome:Rnor_6.0:5:167988385:168004724:-1 gene:ENSRNOG00000018289.6 transcript:ENSRNOT00000024711.5 gene_biotype:protein_coding transcript_biotype:protein_coding gene_symbol:Park7 description:Parkinsonism associated deglycase [Source:RGD Symbol;Acc:621808]	65	12	12	71	189	20	6.77	1.00031	1.03728	1.02674	0.993685	1.02574	0.968549	1.02394	0.927371	1.00797	Quantified
ENSRNOP00000061492	RNA polymerase II subunit A	Polr2a	pep chromosome:Rnor_6.0:10:56339284:56365084:-1 gene:ENSRNOG00000028834.5 transcript:ENSRNOT00000068013.3 gene_biotype:protein_coding transcript_biotype:protein_coding gene_symbol:Polr2a description:RNA polymerase II subunit A [Source:RGD Symbol;Acc:1587326]	14	25	25	32	1970	217.1	7.37	0.992857	1.00531	1.00518	1.00587	0.993471	0.954505	1.00789	1.00799	1.0402	Quantified
ENSRNOP00000027552	protein kinase cAMP-dependent type II regulatory subunit alpha	Prkar2a	pep chromosome:Rnor_6.0:8:117486083:117545564:1 gene:ENSRNOG00000020284.7 transcript:ENSRNOT00000027552.3 gene_biotype:protein_coding transcript_biotype:protein_coding gene_symbol:Prkar2a description:protein kinase cAMP-dependent type II regulatory subunit alpha [Source:RGD Symbol;Acc:3393]	39	12	14	58	401	45.5	4.93	0.996876	1.02027	0.997617	0.996541	1.00216	0.991057	1.01261	0.998643	0.997885	Quantified
ENSRNOP00000008938	ribosomal protein S6 kinase A3	Rps6ka3	pep chromosome:Rnor_6.0:X:37469937:37575624:1 gene:ENSRNOG00000006632.7 transcript:ENSRNOT00000008938.6 gene_biotype:protein_coding transcript_biotype:protein_coding gene_symbol:Rps6ka3 description:ribosomal protein S6 kinase A3 [Source:RGD Symbol;Acc:1563860]	32	14	23	34	740	83.7	6.89	1.01188	1.01972	1.02889	1.00944	0.991525	0.996991	0.997799	0.990068	0.967008	Quantified
ENSRNOP00000028856	heat shock protein family A (Hsp70) member 12B	Hspa12b	pep chromosome:Rnor_6.0:3:123670275:123687691:1 gene:ENSRNOG00000021244.7 transcript:ENSRNOT00000028856.7 gene_biotype:protein_coding transcript_biotype:protein_coding gene_symbol:Hspa12b description:heat shock protein family A (Hsp70) member 12B [Source:RGD Symbol;Acc:1312004]	29	18	19	35	685	76.1	8.41	1.03178	1.03236	0.971614	0.939572	1.02735	0.974761	1.01077	0.987638	1.03652	Quantified
ENSRNOP00000013073	aldo-keto reductase family 1, member B8	Akr1b8	pep chromosome:Rnor_6.0:4:61772064:61784637:1 gene:ENSRNOG00000009734.4 transcript:ENSRNOT00000013073.4 gene_biotype:protein_coding transcript_biotype:protein_coding gene_symbol:Akr1b8 description:aldo-keto reductase family 1, member B8 [Source:RGD Symbol;Acc:708475]	50	7	15	84	316	36.1	7.46	0.809954	1.00664	1.03266	1.34408	1.0644	1.3354	0.782827	0.7732	0.879278	Quantified
ENSRNOP00000068652	heterogeneous nuclear ribonucleoprotein F	Hnrnpf	pep chromosome:Rnor_6.0:4:149957206:149978895:1 gene:ENSRNOG00000014562.6 transcript:ENSRNOT00000083843.1 gene_biotype:protein_coding transcript_biotype:protein_coding gene_symbol:Hnrnpf description:heterogeneous nuclear ribonucleoprotein F [Source:RGD Symbol;Acc:620366]	37	10	12	47	415	45.7	5.49	1.02824	0.9927	1.00897	1.03151	0.988083	0.971974	0.996948	0.974136	1.02051	Quantified
ENSRNOP00000049063	tryptophanyl-tRNA synthetase 1	Wars1	pep chromosome:Rnor_6.0:6:132771028:132802210:-1 gene:ENSRNOG00000004359.7 transcript:ENSRNOT00000050350.5 gene_biotype:protein_coding transcript_biotype:protein_coding gene_symbol:Wars1 description:tryptophanyl-tRNA synthetase 1 [Source:RGD Symbol;Acc:1308278]	42	17	17	39	475	53.4	6.61	1.00734	0.991147	1.04695	1.01558	0.987391	0.996499	0.992445	0.994488	0.981678	Quantified
ENSRNOP00000022676	NOP58 ribonucleoprotein	Nop58	pep chromosome:Rnor_6.0:9:66495832:66519769:1 gene:ENSRNOG00000016486.6 transcript:ENSRNOT00000022676.6 gene_biotype:protein_coding transcript_biotype:protein_coding gene_symbol:Nop58 description:NOP58 ribonucleoprotein [Source:RGD Symbol;Acc:620484]	36	16	16	50	534	60	8.51	0.979897	1.00115	0.984392	0.996702	1.0101	0.974046	1.02564	1.00222	1.03956	Quantified
ENSRNOP00000009175	heterogeneous nuclear ribonucleoprotein L-like	Hnrnpll	pep chromosome:Rnor_6.0:6:2699961:2729394:-1 gene:ENSRNOG00000006929.6 transcript:ENSRNOT00000009175.6 gene_biotype:protein_coding transcript_biotype:protein_coding gene_symbol:Hnrnpll description:heterogeneous nuclear ribonucleoprotein L-like [Source:RGD Symbol;Acc:1305861]	32	16	16	43	591	64.3	5.95	1.00616	0.995977	0.979282	1.02034	0.988685	0.952342	1.00064	1.00006	1.07024	Quantified
ENSRNOP00000059652	neurolysin	Nln	pep chromosome:Rnor_6.0:2:34088342:34185682:-1 gene:ENSRNOG00000011561.7 transcript:ENSRNOT00000066925.1 gene_biotype:protein_coding transcript_biotype:protein_coding gene_symbol:Nln description:neurolysin [Source:RGD Symbol;Acc:621518]	28	19	20	37	704	80.2	6.47	0.991388	0.980607	0.991758	0.991327	1.04427	0.991466	0.996605	1.01	1.01627	Quantified
ENSRNOP00000064632	protein disulfide isomerase family A, member 6	Pdia6	pep chromosome:Rnor_6.0:6:42568220:42585652:1 gene:ENSRNOG00000050197.2 transcript:ENSRNOT00000074829.2 gene_biotype:protein_coding transcript_biotype:protein_coding gene_symbol:Pdia6 description:protein disulfide isomerase family A, member 6 [Source:RGD Symbol;Acc:628688]	30	12	12	43	445	48.7	5.19	1.13147	1.01778	0.98186	1.07585	0.882572	1.01811	0.94653	0.982244	0.978691	Quantified
ENSRNOP00000017379	N(alpha)-acetyltransferase 15, NatA auxiliary subunit	Naa15	pep chromosome:Rnor_6.0:2:140471690:140534259:1 gene:ENSRNOG00000012385.6 transcript:ENSRNOT00000017379.6 gene_biotype:protein_coding transcript_biotype:protein_coding gene_symbol:Naa15 description:N(alpha)-acetyltransferase 15, NatA auxiliary subunit [Source:RGD Symbol;Acc:1310984]	25	22	24	42	865	100.9	7.61	1.01441	1.00532	0.983076	0.985495	0.992862	1.00633	1.00247	1.00226	1.02216	Quantified
ENSRNOP00000045992	myosin light chain 12B	Myl12b	pep chromosome:Rnor_6.0:9:119307176:119321500:-1 gene:ENSRNOG00000015733.6 transcript:ENSRNOT00000048125.4 gene_biotype:protein_coding transcript_biotype:protein_coding gene_symbol:Myl12b description:myosin light chain 12B [Source:RGD Symbol;Acc:628855]	66	1	10	75	172	19.8	4.84	0.98721	0.995183	0.893588	0.952442	1.03336	1.14658	1.04933	0.980317	0.979914	Quantified
ENSRNOP00000068728	glutamyl aminopeptidase	Enpep	pep chromosome:Rnor_6.0:2:233667254:233743866:-1 gene:ENSRNOG00000051854.1 transcript:ENSRNOT00000087062.1 gene_biotype:protein_coding transcript_biotype:protein_coding gene_symbol:Enpep description:glutamyl aminopeptidase [Source:RGD Symbol;Acc:621228]	23	20	20	41	944	107.9	5.29	1.00252	0.993919	0.949085	0.994136	1.01725	0.988642	1.02444	0.994594	1.04946	Quantified
ENSRNOP00000021638	lectin, mannose-binding 2	Lman2	pep chromosome:Rnor_6.0:17:9797907:9816139:1 gene:ENSRNOG00000016161.7 transcript:ENSRNOT00000021638.7 gene_biotype:protein_coding transcript_biotype:protein_coding gene_symbol:Lman2 description:lectin, mannose-binding 2 [Source:RGD Symbol;Acc:1308965]	43	13	13	50	358	40.4	6.95	1.00342	0.98395	0.984425	0.999617	0.989161	1.00184	1.02602	1.00327	1.02256	Quantified
ENSRNOP00000015852	aminoacylase 1	Acy1	pep chromosome:Rnor_6.0:8:115134765:115140080:-1 gene:ENSRNOG00000011189.5 transcript:ENSRNOT00000015851.5 gene_biotype:protein_coding transcript_biotype:protein_coding gene_symbol:Acy1 description:aminoacylase 1 [Source:RGD Symbol;Acc:2030]	50	18	18	46	408	45.8	6.48	0.959688	1.02201	1.0193	1.083	1.04412	0.919497	1.00113	0.984594	0.978623	Quantified
ENSRNOP00000070299	extended synaptotagmin 1	Esyt1	pep chromosome:Rnor_6.0:7:2924603:2941122:-1 gene:ENSRNOG00000060753.1 transcript:ENSRNOT00000082107.1 gene_biotype:protein_coding transcript_biotype:protein_coding gene_symbol:Esyt1 description:extended synaptotagmin 1 [Source:RGD Symbol;Acc:3053]	17	18	18	31	1089	121.1	5.62	1.02368	1.01589	0.990202	0.98672	1.00619	1.00133	1.01436	0.990558	0.984312	Quantified
ENSRNOP00000015057	5' nucleotidase, ecto	Nt5e	pep chromosome:Rnor_6.0:8:95968652:96012696:1 gene:ENSRNOG00000011071.6 transcript:ENSRNOT00000015057.6 gene_biotype:protein_coding transcript_biotype:protein_coding gene_symbol:Nt5e description:5' nucleotidase, ecto [Source:RGD Symbol;Acc:61956]	32	15	15	57	576	63.9	6.98	1.00982	1.03443	1.01716	1.02233	1.03857	1.00504	0.980581	0.960115	0.944933	Quantified
ENSRNOP00000069048	dynactin subunit 2	Dctn2	pep chromosome:Rnor_6.0:7:70556019:70572614:1 gene:ENSRNOG00000025481.4 transcript:ENSRNOT00000087495.1 gene_biotype:protein_coding transcript_biotype:protein_coding gene_symbol:Dctn2 description:dynactin subunit 2 [Source:RGD Symbol;Acc:1303182]	42	16	16	39	420	46.2	5.5	1.01658	1.01355	0.990905	0.996797	0.995561	0.987984	0.969183	1.00416	1.03968	Quantified
ENSRNOP00000043470	dystonin	Dst	pep chromosome:Rnor_6.0:9:37902303:38196273:-1 gene:ENSRNOG00000012207.8 transcript:ENSRNOT00000044452.6 gene_biotype:protein_coding transcript_biotype:protein_coding gene_symbol:Dst description:dystonin [Source:RGD Symbol;Acc:1306566]	3	21	25	28	7512	846.7	5.34	0.998864	0.980082	0.973966	0.999898	0.996576	1.07017	1.01069	0.991427	0.994526	Quantified
ENSRNOP00000066353	sorting nexin 5	Snx5	pep chromosome:Rnor_6.0:3:138378202:138397870:-1 gene:ENSRNOG00000006077.8 transcript:ENSRNOT00000074606.2 gene_biotype:protein_coding transcript_biotype:protein_coding gene_symbol:Snx5 description:sorting nexin 5 [Source:RGD Symbol;Acc:1310190]	44	18	18	34	404	46.8	6.62	1.02835	1.05399	1.00364	1.0125	0.989914	0.987503	0.984318	0.985431	0.967615	Quantified
ENSRNOP00000002977	phosphoglucomutase 2	Pgm2	pep chromosome:Rnor_6.0:14:45829448:45863877:-1 gene:ENSRNOG00000002185.6 transcript:ENSRNOT00000002977.5 gene_biotype:protein_coding transcript_biotype:protein_coding gene_symbol:Pgm2 description:phosphoglucomutase 2 [Source:RGD Symbol;Acc:1306061]	36	21	22	34	620	69	6.34	0.977888	1.05973	0.947217	0.986174	1.02607	0.978811	1.03391	0.994549	1.00926	Quantified
ENSRNOP00000059432	cell division cycle and apoptosis regulator 1	Ccar1	pep chromosome:Rnor_6.0:20:32373443:32416044:-1 gene:ENSRNOG00000000397.6 transcript:ENSRNOT00000067004.2 gene_biotype:protein_coding transcript_biotype:protein_coding gene_symbol:Ccar1 description:cell division cycle and apoptosis regulator 1 [Source:RGD Symbol;Acc:1560358]	16	19	19	29	1148	132.1	5.99	1.03642	1.01748	0.998835	0.991073	1.01448	0.93772	1.0189	0.990009	1.00621	Quantified
ENSRNOP00000024261	septin 2	Septin2	pep chromosome:Rnor_6.0:9:100624876:100658050:1 gene:ENSRNOG00000017952.4 transcript:ENSRNOT00000024261.4 gene_biotype:protein_coding transcript_biotype:protein_coding gene_symbol:Septin2 description:septin 2 [Source:RGD Symbol;Acc:620056]	40	12	12	47	361	41.6	6.6	0.971486	1.05259	1.0117	1.0073	0.979623	0.95445	1.03379	1.02327	0.97884	Quantified
ENSRNOP00000010753	proteasome subunit alpha type 3-like	Psma3l	pep chromosome:Rnor_6.0:6:93423002:93444240:1 gene:ENSRNOG00000007851.6 transcript:ENSRNOT00000010753.6 gene_biotype:protein_coding transcript_biotype:protein_coding gene_symbol:Psma3l description:proteasome subunit alpha type 3-like [Source:RGD Symbol;Acc:1598236]	37	13	13	46	255	28.4	5.44	1.02783	1.00355	0.994952	0.988018	1.02272	0.98332	0.995347	0.994381	1.0027	Quantified
ENSRNOP00000001211	argininosuccinate lyase	Asl	pep chromosome:Rnor_6.0:12:30165694:30178341:1 gene:ENSRNOG00000000903.7 transcript:ENSRNOT00000001211.7 gene_biotype:protein_coding transcript_biotype:protein_coding gene_symbol:Asl description:argininosuccinate lyase [Source:RGD Symbol;Acc:619974]	36	15	15	33	461	51.4	6.27	0.996931	0.977652	1.01177	0.981355	1.01585	1.01905	1.00653	0.980113	1.02488	Quantified
ENSRNOP00000075779	platelet-activating factor acetylhydrolase 1b, regulatory subunit 1	Pafah1b1	pep chromosome:Rnor_6.0:10:61456145:61576952:-1 gene:ENSRNOG00000002755.6 transcript:ENSRNOT00000092712.1 gene_biotype:protein_coding transcript_biotype:protein_coding gene_symbol:Pafah1b1 description:platelet-activating factor acetylhydrolase 1b, regulatory subunit 1 [Source:RGD Symbol;Acc:620331]	42	18	18	42	410	46.6	7.37	0.99855	0.994128	0.999864	0.988903	1.00072	1.00325	0.996567	1.00706	1.02539	Quantified
ENSRNOP00000049677	four and a half LIM domains 1	Fhl1	pep chromosome:Rnor_6.0:X:159158194:159172518:1 gene:ENSRNOG00000000875.8 transcript:ENSRNOT00000043820.5 gene_biotype:protein_coding transcript_biotype:protein_coding gene_symbol:Fhl1 description:four and a half LIM domains 1 [Source:RGD Symbol;Acc:2615]	50	13	13	40	296	33.6	8.46	0.954419	1.17304	0.975227	1.0625	0.983833	0.920525	1.01553	0.992296	0.935461	Quantified
ENSRNOP00000000886	coronin 1C	Coro1c	pep chromosome:Rnor_6.0:12:48481750:48554052:1 gene:ENSRNOG00000000697.4 transcript:ENSRNOT00000000886.4 gene_biotype:protein_coding transcript_biotype:protein_coding gene_symbol:Coro1c description:coronin 1C [Source:RGD Symbol;Acc:1564490]	37	19	20	37	474	53.1	7.08	1.02829	1.15422	1.00711	0.983591	0.980137	0.90772	1.03863	0.970733	0.939338	Quantified
ENSRNOP00000073800	adipocyte plasma membrane associated protein	Apmap	pep chromosome:Rnor_6.0:3:146377497:146407252:-1 gene:ENSRNOG00000006795.8 transcript:ENSRNOT00000091310.1 gene_biotype:protein_coding transcript_biotype:protein_coding gene_symbol:Apmap description:adipocyte plasma membrane associated protein [Source:RGD Symbol;Acc:1308874]	38	15	15	40	415	46.4	6.14	1.00247	1.00841	0.940289	0.966141	1.05463	0.999394	1.04938	0.995909	0.996364	Quantified
ENSRNOP00000068779	phosphoribosylformylglycinamidine synthase	Pfas	pep chromosome:Rnor_6.0:10:55571118:55586034:-1 gene:ENSRNOG00000005193.7 transcript:ENSRNOT00000080769.1 gene_biotype:protein_coding transcript_biotype:protein_coding gene_symbol:Pfas description:phosphoribosylformylglycinamidine synthase [Source:RGD Symbol;Acc:1304926]	18	18	18	24	1337	144.3	5.73	0.960425	1.00625	1.01163	1.04264	1.00975	0.938871	1.00715	1.01789	1.0187	Quantified
ENSRNOP00000001154	RNA binding motif protein, X-linked	Rbmx	pep chromosome:Rnor_6.0:X:159884885:159891326:-1 gene:ENSRNOG00000000866.7 transcript:ENSRNOT00000001154.7 gene_biotype:protein_coding transcript_biotype:protein_coding gene_symbol:Rbmx description:RNA binding motif protein, X-linked [Source:RGD Symbol;Acc:1565256]	45	5	21	61	390	42.2	10.05	1.01313	1.00124	1.01467	1.03349	0.997806	0.891426	1.02717	0.979889	1.05191	Quantified
ENSRNOP00000071643	glycerol-3-phosphate dehydrogenase 2	Gpd2	pep chromosome:Rnor_6.0:3:43293185:43355860:1 gene:ENSRNOG00000033824.4 transcript:ENSRNOT00000090323.1 gene_biotype:protein_coding transcript_biotype:protein_coding gene_symbol:Gpd2 description:glycerol-3-phosphate dehydrogenase 2 [Source:RGD Symbol;Acc:2726]	34	20	20	28	614	69	6.33	1.02221	1.00016	1.02827	0.984895	0.996306	0.957672	0.990446	1.00069	1.03185	Quantified
ENSRNOP00000027665	SEC23 interacting protein	Sec23ip	pep chromosome:Rnor_6.0:1:200167169:200210377:1 gene:ENSRNOG00000020411.6 transcript:ENSRNOT00000027665.6 gene_biotype:protein_coding transcript_biotype:protein_coding gene_symbol:Sec23ip description:SEC23 interacting protein [Source:RGD Symbol;Acc:1309328]	23	22	22	36	999	110.9	5.67	0.982407	0.965226	0.998261	1.04591	1.00801	1.08892	1.02228	1.00533	0.899755	Quantified
ENSRNOP00000001609	glutamine amidotransferase like class 1 domain containing 3A	Gatd3a	pep chromosome:Rnor_6.0:20:11244353:11252449:1 gene:ENSRNOG00000001211.4 transcript:ENSRNOT00000001609.4 gene_biotype:protein_coding transcript_biotype:protein_coding gene_symbol:Gatd3a description:glutamine amidotransferase like class 1 domain containing 3A [Source:RGD Symbol;Acc:1303003]	51	11	11	35	266	28.2	8.92	0.97447	0.991193	0.967763	0.954593	1.02106	1.02157	1.05096	0.999291	1.03356	Quantified
ENSRNOP00000038134	coatomer protein complex, subunit gamma 2	Copg2	pep chromosome:Rnor_6.0:4:58064833:58195143:-1 gene:ENSRNOG00000011014.7 transcript:ENSRNOT00000033706.5 gene_biotype:protein_coding transcript_biotype:protein_coding gene_symbol:Copg2 description:coatomer protein complex, subunit gamma 2 [Source:RGD Symbol;Acc:1566215]	26	18	20	44	870	97.5	5.74	1.01557	1.00756	0.972078	0.988069	0.989889	0.969925	1.01403	1.0091	1.04739	Quantified
ENSRNOP00000070579	serine/threonine-protein phosphatase 2A catalytic subunit alpha-like	LOC100362453	pep chromosome:Rnor_6.0:11:86421106:86422907:1 gene:ENSRNOG00000001893.6 transcript:ENSRNOT00000002599.6 gene_biotype:protein_coding transcript_biotype:protein_coding gene_symbol:LOC100362453 description:serine/threonine-protein phosphatase 2A catalytic subunit alpha-like [Source:RGD Symbol;Acc:2318135]	49	2	12	34	309	35.5	5.43	1.16144	1.08278	0.951622	0.98951	0.936814	0.920092	0.954912	1.01087	1.00305	Quantified
ENSRNOP00000008356	calumenin	Calu	pep chromosome:Rnor_6.0:4:56625561:56653105:1 gene:ENSRNOG00000006197.7 transcript:ENSRNOT00000008356.5 gene_biotype:protein_coding transcript_biotype:protein_coding gene_symbol:Calu description:calumenin [Source:RGD Symbol;Acc:620383]	59	3	14	45	315	37	4.67	1.0381	0.991572	1.01692	1.04749	0.999012	1.00616	1.01465	0.950203	0.948581	Quantified
ENSRNOP00000021837	cytoskeleton associated protein 5	Ckap5	pep chromosome:Rnor_6.0:3:80468154:80526593:1 gene:ENSRNOG00000016067.8 transcript:ENSRNOT00000021837.8 gene_biotype:protein_coding transcript_biotype:protein_coding gene_symbol:Ckap5 description:cytoskeleton associated protein 5 [Source:RGD Symbol;Acc:1563596]	13	22	22	37	1698	187.8	8.12	1.00767	0.985616	0.98735	1.0045	0.988474	1.02181	0.982428	1.01851	1.01912	Quantified
ENSRNOP00000021816	ankyrin repeat and FYVE domain containing 1	Ankfy1	pep chromosome:Rnor_6.0:10:59259955:59331669:1 gene:ENSRNOG00000016212.6 transcript:ENSRNOT00000021816.6 gene_biotype:protein_coding transcript_biotype:protein_coding gene_symbol:Ankfy1 description:ankyrin repeat and FYVE domain containing 1 [Source:RGD Symbol;Acc:1309598]	17	20	20	32	1169	128.6	5.94	1.05359	1.02829	0.99937	0.964495	0.995181	1.01325	0.999705	0.965778	0.993339	Quantified
ENSRNOP00000074919	actin related protein 2/3 complex, subunit 2	Arpc2	pep chromosome:Rnor_6.0:9:81518176:81548866:1 gene:ENSRNOG00000014289.7 transcript:ENSRNOT00000078317.1 gene_biotype:protein_coding transcript_biotype:protein_coding gene_symbol:Arpc2 description:actin related protein 2/3 complex, subunit 2 [Source:RGD Symbol;Acc:1305848]	51	17	17	95	300	34.3	7.36	1.05407	1.06145	0.994698	0.954868	0.973033	0.967972	1.01449	0.994522	0.996953	Quantified
ENSRNOP00000024736	mannose receptor, C type 1	Mrc1	pep chromosome:Rnor_6.0:17:81352700:81433743:1 gene:ENSRNOG00000018251.7 transcript:ENSRNOT00000024736.7 gene_biotype:protein_coding transcript_biotype:protein_coding gene_symbol:Mrc1 description:mannose receptor, C type 1 [Source:RGD Symbol;Acc:1309353]	15	23	23	30	1456	164.9	6.86	1.06629	1.02046	0.918377	1.01232	0.98732	1.03927	0.980244	1.00129	0.989899	Quantified
ENSRNOP00000066041	thrombospondin 1	Thbs1	pep chromosome:Rnor_6.0:3:109862120:109873466:1 gene:ENSRNOG00000045829.2 transcript:ENSRNOT00000070912.2 gene_biotype:protein_coding transcript_biotype:protein_coding gene_symbol:Thbs1 description:thrombospondin 1 [Source:RGD Symbol;Acc:1588455]	20	22	22	36	1144	127	5.03	0.955296	1.01998	0.892958	1.02483	1.08593	0.927965	1.04828	0.965978	1.09164	Quantified
ENSRNOP00000021229	sorbin and SH3 domain containing 1	Sorbs1	pep chromosome:Rnor_6.0:1:259376933:259484569:-1 gene:ENSRNOG00000015658.8 transcript:ENSRNOT00000021229.8 gene_biotype:protein_coding transcript_biotype:protein_coding gene_symbol:Sorbs1 description:sorbin and SH3 domain containing 1 [Source:RGD Symbol;Acc:1586598]	29	18	19	31	740	83	7.64	0.974058	1.11062	0.928025	1.02426	1.04832	0.985658	1.05543	0.98228	0.904158	Quantified
ENSRNOP00000070544	eukaryotic translation initiation factor 4 gamma, 3	Eif4g3	pep chromosome:Rnor_6.0:5:156439633:156563827:1 gene:ENSRNOG00000014368.7 transcript:ENSRNOT00000090232.1 gene_biotype:protein_coding transcript_biotype:protein_coding gene_symbol:Eif4g3 description:eukaryotic translation initiation factor 4 gamma, 3 [Source:RGD Symbol;Acc:1311370]	15	18	23	33	1614	179	5.85	1.0259	0.991462	1.02471	0.976158	1.0126	0.992676	0.986994	0.992293	1.0102	Quantified
ENSRNOP00000072145	phosphatidylinositol transfer protein, alpha	Pitpna	pep chromosome:Rnor_6.0:10:63731959:63769424:1 gene:ENSRNOG00000003846.7 transcript:ENSRNOT00000090554.1 gene_biotype:protein_coding transcript_biotype:protein_coding gene_symbol:Pitpna description:phosphatidylinositol transfer protein, alpha [Source:RGD Symbol;Acc:61885]	51	15	17	46	271	31.9	6.37	0.993825	1.02623	0.986938	0.986472	0.997281	0.984791	1.01294	1.03508	0.990358	Quantified
ENSRNOP00000013570	thyroid hormone receptor associated protein 3	Thrap3	pep chromosome:Rnor_6.0:5:144179023:144221263:-1 gene:ENSRNOG00000009977.6 transcript:ENSRNOT00000013570.6 gene_biotype:protein_coding transcript_biotype:protein_coding gene_symbol:Thrap3 description:thyroid hormone receptor associated protein 3 [Source:RGD Symbol;Acc:1306129]	20	22	23	31	951	108.2	10.15	1.01295	0.996352	1.0369	1.01758	1.00419	0.931514	1.02166	0.999334	0.990677	Quantified
ENSRNOP00000017252	alcohol dehydrogenase 5 (class III), chi polypeptide	Adh5	pep chromosome:Rnor_6.0:2:243728434:243740899:1 gene:ENSRNOG00000046357.2 transcript:ENSRNOT00000017252.6 gene_biotype:protein_coding transcript_biotype:protein_coding gene_symbol:Adh5 description:alcohol dehydrogenase 5 (class III), chi polypeptide [Source:RGD Symbol;Acc:2292706]	38	14	14	55	374	39.6	7.49	0.99386	1.04067	1.04825	1.02006	1.00616	0.958078	0.987611	0.986826	0.970825	Quantified
ENSRNOP00000027765	solute carrier family 25 member 24	Slc25a24	pep chromosome:Rnor_6.0:2:211930326:211967505:1 gene:ENSRNOG00000020470.5 transcript:ENSRNOT00000027765.5 gene_biotype:protein_coding transcript_biotype:protein_coding gene_symbol:Slc25a24 description:solute carrier family 25 member 24 [Source:RGD Symbol;Acc:1311982]	29	14	14	53	475	52.9	8.05	1.00476	0.978875	0.968262	0.967697	0.985907	0.985195	1.01766	1.0282	1.07798	Quantified
ENSRNOP00000035561	tropomyosin 3	Tpm3	pep chromosome:Rnor_6.0:2:189423559:189442319:1 gene:ENSRNOG00000017441.8 transcript:ENSRNOT00000029076.5 gene_biotype:protein_coding transcript_biotype:protein_coding gene_symbol:Tpm3 description:tropomyosin 3 [Source:RGD Symbol;Acc:621546]	41	1	17	68	285	33	4.72	1.01354	0.978568	0.978676	1.04823	1.02479	1.03876	1.01946	0.979613	0.932585	Quantified
ENSRNOP00000001556	acyl-CoA dehydrogenase short chain	Acads	pep chromosome:Rnor_6.0:12:47254484:47263747:1 gene:ENSRNOG00000001177.4 transcript:ENSRNOT00000001556.4 gene_biotype:protein_coding transcript_biotype:protein_coding gene_symbol:Acads description:acyl-CoA dehydrogenase short chain [Source:RGD Symbol;Acc:620514]	36	13	13	64	414	44.9	8.28	0.949157	0.96778	0.952657	0.941924	1.04149	1.03525	1.03079	1.04073	1.05615	Quantified
ENSRNOP00000021657	propionyl-CoA carboxylase subunit beta	Pccb	pep chromosome:Rnor_6.0:8:109368624:109418872:-1 gene:ENSRNOG00000015869.5 transcript:ENSRNOT00000021657.3 gene_biotype:protein_coding transcript_biotype:protein_coding gene_symbol:Pccb description:propionyl-CoA carboxylase subunit beta [Source:RGD Symbol;Acc:3265]	37	17	17	35	541	58.6	7.84	0.909538	0.839394	1.00631	0.964517	1.05176	1.13508	1.02747	0.985719	1.09897	Quantified
ENSRNOP00000052533	tripartite motif-containing 25	Trim25	pep chromosome:Rnor_6.0:10:76343847:76362145:1 gene:ENSRNOG00000002341.7 transcript:ENSRNOT00000055674.4 gene_biotype:protein_coding transcript_biotype:protein_coding gene_symbol:Trim25 description:tripartite motif-containing 25 [Source:RGD Symbol;Acc:1594396]	31	17	17	37	643	71.9	8.28	1.02595	0.988143	1.06945	0.991965	0.986625	1.01116	0.997034	0.99828	0.944216	Quantified
ENSRNOP00000071109	cytoplasmic linker associated protein 2	Clasp2	pep chromosome:Rnor_6.0:8:122003916:122184089:1 gene:ENSRNOG00000009161.7 transcript:ENSRNOT00000091980.1 gene_biotype:protein_coding transcript_biotype:protein_coding gene_symbol:Clasp2 description:cytoplasmic linker associated protein 2 [Source:RGD Symbol;Acc:619789]	15	16	22	27	1505	164.6	8.03	1.00001	1.00047	1.02366	0.991966	1.00988	1.01513	1.00522	0.983745	0.98363	Quantified
ENSRNOP00000010601	cytoskeleton-associated protein 4	Ckap4	pep chromosome:Rnor_6.0:7:24939498:24947595:1 gene:ENSRNOG00000008016.6 transcript:ENSRNOT00000010601.6 gene_biotype:protein_coding transcript_biotype:protein_coding gene_symbol:Ckap4 description:cytoskeleton-associated protein 4 [Source:RGD Symbol;Acc:1311989]	50	16	16	28	326	36.3	4.82	1.077	1.0216	1.00324	1.07478	0.936518	0.972493	0.97128	0.9758	0.980659	Quantified
ENSRNOP00000040223	hydroxyacid oxidase 2	Hao2	pep chromosome:Rnor_6.0:2:200785507:200808501:1 gene:ENSRNOG00000019470.6 transcript:ENSRNOT00000046942.2 gene_biotype:protein_coding transcript_biotype:protein_coding gene_symbol:Hao2 description:hydroxyacid oxidase 2 [Source:RGD Symbol;Acc:70972]	42	15	15	36	353	39.2	7.64	0.986835	0.912667	1.13629	1.09926	0.998867	0.907101	1.03894	0.983607	0.946083	Quantified
ENSRNOP00000007298	dihydrolipoamide S-succinyltransferase	Dlst	pep chromosome:Rnor_6.0:6:108936664:108959803:1 gene:ENSRNOG00000005061.5 transcript:ENSRNOT00000007298.4 gene_biotype:protein_coding transcript_biotype:protein_coding gene_symbol:Dlst description:dihydrolipoamide S-succinyltransferase [Source:RGD Symbol;Acc:1359615]	28	12	12	90	454	48.9	8.7	0.96291	0.938172	0.867107	0.827775	1.01061	1.12983	1.08412	1.02894	1.16958	Quantified
ENSRNOP00000074305	kinesin family member 1B	Kif1b	pep chromosome:Rnor_6.0:5:165938576:165999203:-1 gene:ENSRNOG00000057626.1 transcript:ENSRNOT00000077784.1 gene_biotype:protein_coding transcript_biotype:protein_coding gene_symbol:Kif1b description:kinesin family member 1B [Source:RGD Symbol;Acc:621520]	14	15	15	102	1089	120.3	5.11	0.972689	0.975194	0.980189	1.00469	1.01395	1.04979	0.974629	1.02764	1.01804	Quantified
ENSRNOP00000020606	steroidogenic acute regulatory protein	Star	pep chromosome:Rnor_6.0:16:71036204:71040847:-1 gene:ENSRNOG00000015052.4 transcript:ENSRNOT00000020606.4 gene_biotype:protein_coding transcript_biotype:protein_coding gene_symbol:Star description:steroidogenic acute regulatory protein [Source:RGD Symbol;Acc:3770]	62	13	13	57	284	31.5	8.72	1.0024	0.825398	1.00099	0.891669	0.988691	1.27052	0.918123	1.00821	1.11727	Quantified
ENSRNOP00000019486	basic leucine zipper and W2 domains 1	Bzw1	pep chromosome:Rnor_6.0:9:65279675:65291651:1 gene:ENSRNOG00000013977.4 transcript:ENSRNOT00000019486.4 gene_biotype:protein_coding transcript_biotype:protein_coding gene_symbol:Bzw1 description:basic leucine zipper and W2 domains 1 [Source:RGD Symbol;Acc:735129]	30	17	17	48	419	48	5.92	1.0848	1.02274	0.973034	1.02545	0.937944	1.02742	0.970919	1.02179	0.95084	Quantified
ENSRNOP00000070076	adenylate kinase 3	Ak3	pep chromosome:Rnor_6.0:1:247144491:247169693:-1 gene:ENSRNOG00000052506.1 transcript:ENSRNOT00000079875.1 gene_biotype:protein_coding transcript_biotype:protein_coding gene_symbol:Ak3 description:adenylate kinase 3 [Source:RGD Symbol;Acc:619885]	61	14	14	49	227	25.5	8.85	0.96111	1.00523	1.00136	0.999632	0.981622	1.01898	1.01911	1.01556	1.01293	Quantified
ENSRNOP00000065389	glutathione S-transferase, mu 5	Gstm5	pep chromosome:Rnor_6.0:2:210685197:210688272:1 gene:ENSRNOG00000049743.2 transcript:ENSRNOT00000072342.2 gene_biotype:protein_coding transcript_biotype:protein_coding gene_symbol:Gstm5 description:glutathione S-transferase, mu 5 [Source:RGD Symbol;Acc:61964]	49	10	12	68	225	26.6	6.76	0.978375	1.10526	0.937177	1.03918	1.01791	0.936503	0.959432	1.00808	1.03245	Quantified
ENSRNOP00000025819	proteasome 26S subunit, ATPase 4	Psmc4	pep chromosome:Rnor_6.0:1:84978206:84986581:-1 gene:ENSRNOG00000018994.5 transcript:ENSRNOT00000025819.5 gene_biotype:protein_coding transcript_biotype:protein_coding gene_symbol:Psmc4 description:proteasome 26S subunit, ATPase 4 [Source:RGD Symbol;Acc:621102]	39	16	17	72	418	47.4	5.21	1.0225	1.00401	1.0236	0.993527	1.00952	1.00791	0.992706	0.985084	0.974371	Quantified
ENSRNOP00000062425	cathepsin A	Ctsa	pep chromosome:Rnor_6.0:3:161298962:161304625:1 gene:ENSRNOG00000015857.6 transcript:ENSRNOT00000066028.1 gene_biotype:protein_coding transcript_biotype:protein_coding gene_symbol:Ctsa description:cathepsin A [Source:RGD Symbol;Acc:1309070]	28	13	13	55	456	51.2	5.24	1.03125	0.940936	0.858551	0.876716	1.0266	1.0093	1.09361	1.09256	1.08482	Quantified
ENSRNOP00000020763	phosphoglucomutase 5	Pgm5	pep chromosome:Rnor_6.0:1:242582642:242765807:-1 gene:ENSRNOG00000015406.7 transcript:ENSRNOT00000020763.7 gene_biotype:protein_coding transcript_biotype:protein_coding gene_symbol:Pgm5 description:phosphoglucomutase 5 [Source:RGD Symbol;Acc:1307969]	36	19	19	36	567	62.2	7.83	0.89974	1.19446	0.926439	1.04189	1.07614	0.918325	1.06245	1.01765	0.87486	Quantified
ENSRNOP00000051781	dedicator of cyto-kinesis 1	Dock1	pep chromosome:Rnor_6.0:1:206900617:207414843:1 gene:ENSRNOG00000018683.5 transcript:ENSRNOT00000054897.2 gene_biotype:protein_coding transcript_biotype:protein_coding gene_symbol:Dock1 description:dedicator of cyto-kinesis 1 [Source:RGD Symbol;Acc:1566072]	15	25	26	32	1864	214.8	7.53	1.00699	1.0084	1.01112	0.982931	0.99951	0.970315	1.01456	0.99454	1.02445	Quantified
ENSRNOP00000061544	far upstream element binding protein 1	Fubp1	pep chromosome:Rnor_6.0:2:257425679:257449568:1 gene:ENSRNOG00000043370.3 transcript:ENSRNOT00000066199.3 gene_biotype:protein_coding transcript_biotype:protein_coding gene_symbol:Fubp1 description:far upstream element binding protein 1 [Source:RGD Symbol;Acc:1591892]	29	15	19	48	642	67.5	7.61	1.02419	1.01539	1.00499	0.997677	0.996565	0.946831	1.00545	1.01525	1.00588	Quantified
ENSRNOP00000069456	alanyl aminopeptidase, membrane	Anpep	pep chromosome:Rnor_6.0:1:141561334:141604273:-1 gene:ENSRNOG00000014610.5 transcript:ENSRNOT00000092125.1 gene_biotype:protein_coding transcript_biotype:protein_coding gene_symbol:Anpep description:alanyl aminopeptidase, membrane [Source:RGD Symbol;Acc:2991]	18	17	17	32	965	109.4	5.47	1.02491	0.948369	0.987299	1.00854	0.998309	1.01008	1.04883	1.01366	0.973361	Quantified
ENSRNOP00000040092	ATPase plasma membrane Ca2+ transporting 1	Atp2b1	pep chromosome:Rnor_6.0:7:41114697:41220579:1 gene:ENSRNOG00000004026.6 transcript:ENSRNOT00000041354.4 gene_biotype:protein_coding transcript_biotype:protein_coding gene_symbol:Atp2b1 description:ATPase plasma membrane Ca2+ transporting 1 [Source:RGD Symbol;Acc:621303]	19	8	18	35	1176	129.4	6.16	0.999159	1.02909	0.983299	0.989185	1.00591	0.948223	1.01958	1.00042	1.03784	Quantified
ENSRNOP00000034144	nitrilase family, member 2	Nit2	pep chromosome:Rnor_6.0:11:45462345:45473104:1 gene:ENSRNOG00000027797.4 transcript:ENSRNOT00000029420.4 gene_biotype:protein_coding transcript_biotype:protein_coding gene_symbol:Nit2 description:nitrilase family, member 2 [Source:RGD Symbol;Acc:1310494]	54	14	14	37	276	30.7	7.3	0.962186	1.0817	1.05859	0.970524	1.02657	0.91606	0.97581	0.957108	1.06306	Quantified
ENSRNOP00000034828	eukaryotic translation elongation factor 1 delta	Eef1d	pep chromosome:Rnor_6.0:7:116928265:116936674:-1 gene:ENSRNOG00000021638.6 transcript:ENSRNOT00000029456.5 gene_biotype:protein_coding transcript_biotype:protein_coding gene_symbol:Eef1d description:eukaryotic translation elongation factor 1 delta [Source:RGD Symbol;Acc:621174]	24	13	15	38	650	72.1	6.55	1.048	0.981392	1.01941	1.03044	0.96098	1.02434	0.9894	0.993616	0.966703	Quantified
ENSRNOP00000069432	lanosterol synthase	Lss	pep chromosome:Rnor_6.0:20:12842918:12870496:-1 gene:ENSRNOG00000054549.1 transcript:ENSRNOT00000078412.1 gene_biotype:protein_coding transcript_biotype:protein_coding gene_symbol:Lss description:lanosterol synthase [Source:RGD Symbol;Acc:620955]	25	16	16	29	733	83.2	6.67	0.929323	0.940789	0.9607	0.907	1.05747	1.01931	1.01062	1.09471	1.0964	Quantified
ENSRNOP00000025086	nucleoporin 93	Nup93	pep chromosome:Rnor_6.0:19:11159774:11263980:-1 gene:ENSRNOG00000018564.6 transcript:ENSRNOT00000025086.6 gene_biotype:protein_coding transcript_biotype:protein_coding gene_symbol:Nup93 description:nucleoporin 93 [Source:RGD Symbol;Acc:1311525]	27	23	23	33	819	93.2	5.72	0.968972	0.975687	0.995882	0.989758	1.0071	0.973904	1.02086	1.00096	1.08101	Quantified
ENSRNOP00000025196	solute carrier family 3 member 2	Slc3a2	pep chromosome:Rnor_6.0:1:224906554:224921092:-1 gene:ENSRNOG00000018487.3 transcript:ENSRNOT00000025196.3 gene_biotype:protein_coding transcript_biotype:protein_coding gene_symbol:Slc3a2 description:solute carrier family 3 member 2 [Source:RGD Symbol;Acc:3073]	29	13	13	50	566	61.8	5.19	0.951308	1.02289	1.00007	1.02124	1.02701	0.921482	1.03291	0.988839	1.04656	Quantified
ENSRNOP00000021958	endoplasmic reticulum metallopeptidase 1	Ermp1	pep chromosome:Rnor_6.0:1:247787582:247821728:-1 gene:ENSRNOG00000010915.5 transcript:ENSRNOT00000021958.4 gene_biotype:protein_coding transcript_biotype:protein_coding gene_symbol:Ermp1 description:endoplasmic reticulum metallopeptidase 1 [Source:RGD Symbol;Acc:727831]	18	16	16	36	898	99.9	7.49	1.01745	1.01104	1.00617	1.00692	0.991556	0.959288	1.03431	0.9936	0.991772	Quantified
ENSRNOP00000013632	galactosidase, beta 1	Glb1	pep chromosome:Rnor_6.0:8:122439328:122511939:1 gene:ENSRNOG00000010196.5 transcript:ENSRNOT00000013632.5 gene_biotype:protein_coding transcript_biotype:protein_coding gene_symbol:Glb1 description:galactosidase, beta 1 [Source:RGD Symbol;Acc:1597145]	24	12	13	47	647	73.2	7.49	1.0086	0.975023	0.902331	0.985874	0.996565	1.02603	1.04285	1.02534	1.05321	Quantified
ENSRNOP00000067771	protein kinase cAMP-dependent type I regulatory subunit alpha	Prkar1a	pep chromosome:Rnor_6.0:10:97940705:97957336:1 gene:ENSRNOG00000049876.1 transcript:ENSRNOT00000071153.1 gene_biotype:protein_coding transcript_biotype:protein_coding gene_symbol:Prkar1a description:protein kinase cAMP-dependent type I regulatory subunit alpha [Source:RGD Symbol;Acc:3391]	35	11	16	60	381	43.1	5.35	1.06616	0.98628	0.992854	0.95511	0.974866	0.981984	1.02018	0.991522	1.04354	Quantified
ENSRNOP00000010593	succinate dehydrogenase complex iron sulfur subunit B	Sdhb	pep chromosome:Rnor_6.0:5:159484370:159505064:1 gene:ENSRNOG00000007967.7 transcript:ENSRNOT00000010593.7 gene_biotype:protein_coding transcript_biotype:protein_coding gene_symbol:Sdhb description:succinate dehydrogenase complex iron sulfur subunit B [Source:RGD Symbol;Acc:1308598]	39	14	14	67	282	31.8	8.68	0.986003	0.95778	0.994753	0.983215	1.02327	0.98472	1.04308	0.988987	1.05142	Quantified
ENSRNOP00000024895	cell cycle and apoptosis regulator 2	Ccar2	pep chromosome:Rnor_6.0:15:51818897:51834030:-1 gene:ENSRNOG00000018295.7 transcript:ENSRNOT00000024895.7 gene_biotype:protein_coding transcript_biotype:protein_coding gene_symbol:Ccar2 description:cell cycle and apoptosis regulator 2 [Source:RGD Symbol;Acc:1309922]	25	21	21	41	922	102.7	5.16	0.996856	1.00213	1.03091	1.01683	1.02124	0.956603	1.01762	0.992979	0.976705	Quantified
ENSRNOP00000044340	G protein subunit beta 1	Gnb1	pep chromosome:Rnor_6.0:5:172934990:172979986:1 gene:ENSRNOG00000016638.5 transcript:ENSRNOT00000041789.2 gene_biotype:protein_coding transcript_biotype:protein_coding gene_symbol:Gnb1 description:G protein subunit beta 1 [Source:RGD Symbol;Acc:2718]	49	6	12	56	340	37.4	6	1.01671	1.02494	0.973515	0.997374	1.02335	0.957484	1.02845	0.96754	1.02269	Quantified
ENSRNOP00000009183	glycogen phosphorylase L	Pygl	pep chromosome:Rnor_6.0:6:92597706:92643847:-1 gene:ENSRNOG00000006388.5 transcript:ENSRNOT00000009183.5 gene_biotype:protein_coding transcript_biotype:protein_coding gene_symbol:Pygl description:glycogen phosphorylase L [Source:RGD Symbol;Acc:620687]	22	14	19	59	850	97.4	7.2	1.09781	1.01792	0.996495	0.96474	0.941504	1.02411	1.01629	1.00751	0.946659	Quantified
ENSRNOP00000007624	succinate-CoA ligase, alpha subunit	Suclg1	pep chromosome:Rnor_6.0:4:101180404:101210746:1 gene:ENSRNOG00000005587.4 transcript:ENSRNOT00000007624.4 gene_biotype:protein_coding transcript_biotype:protein_coding gene_symbol:Suclg1 description:succinate-CoA ligase, alpha subunit [Source:RGD Symbol;Acc:619821]	31	10	10	53	360	37.5	9.48	0.975742	0.952209	0.954153	0.914284	1.02573	1.03327	1.04655	0.988763	1.12458	Quantified
ENSRNOP00000013914	apoptosis inhibitor 5	Api5	pep chromosome:Rnor_6.0:3:83310884:83335960:-1 gene:ENSRNOG00000009689.4 transcript:ENSRNOT00000013914.4 gene_biotype:protein_coding transcript_biotype:protein_coding gene_symbol:Api5 description:apoptosis inhibitor 5 [Source:RGD Symbol;Acc:1309772]	38	19	19	37	504	56.8	5.92	1.02947	1.02576	0.988462	1.00545	0.992689	0.949652	1.00281	1.02045	0.997784	Quantified
ENSRNOP00000020402	SUMO1 activating enzyme subunit 1	Sae1	pep chromosome:Rnor_6.0:1:78277515:78333321:-1 gene:ENSRNOG00000015128.6 transcript:ENSRNOT00000020402.6 gene_biotype:protein_coding transcript_biotype:protein_coding gene_symbol:Sae1 description:SUMO1 activating enzyme subunit 1 [Source:RGD Symbol;Acc:1306098]	47	16	16	47	349	38.5	5.16	0.955484	0.986844	1.0075	1.0074	1.01463	0.998052	0.999281	1.05658	0.989231	Quantified
ENSRNOP00000020267	dihydrolipoamide branched chain transacylase E2	Dbt	pep chromosome:Rnor_6.0:2:219563783:219592650:1 gene:ENSRNOG00000015029.6 transcript:ENSRNOT00000020267.6 gene_biotype:protein_coding transcript_biotype:protein_coding gene_symbol:Dbt description:dihydrolipoamide branched chain transacylase E2 [Source:RGD Symbol;Acc:68403]	35	17	17	49	482	53.2	8.41	0.973077	0.974304	0.948794	0.941926	1.01642	1.05529	1.03366	0.999007	1.07374	Quantified
ENSRNOP00000039338	thiosulfate sulfurtransferase	Tst	pep chromosome:Rnor_6.0:7:119616324:119623072:-1 gene:ENSRNOG00000000186.7 transcript:ENSRNOT00000050511.5 gene_biotype:protein_coding transcript_biotype:protein_coding gene_symbol:Tst description:thiosulfate sulfurtransferase [Source:RGD Symbol;Acc:3913]	49	14	14	103	297	33.4	7.85	0.958207	0.996515	0.959387	0.974622	1.05388	1.00342	1.03084	1.00307	1.0344	Quantified
ENSRNOP00000069266	ubiquitin specific peptidase 47	Usp47	pep chromosome:Rnor_6.0:1:176854816:176936884:1 gene:ENSRNOG00000026754.6 transcript:ENSRNOT00000087461.1 gene_biotype:protein_coding transcript_biotype:protein_coding gene_symbol:Usp47 description:ubiquitin specific peptidase 47 [Source:RGD Symbol;Acc:1310411]	17	22	22	27	1375	157.2	5.12	1.02337	1.01213	1.01232	1.02427	0.978225	1.00966	0.984872	1.00347	0.965929	Quantified
ENSRNOP00000004313	serpin family F member 1	Serpinf1	pep chromosome:Rnor_6.0:10:62241756:62254287:-1 gene:ENSRNOG00000003172.6 transcript:ENSRNOT00000004313.5 gene_biotype:protein_coding transcript_biotype:protein_coding gene_symbol:Serpinf1 description:serpin family F member 1 [Source:RGD Symbol;Acc:631369]	40	16	16	31	418	46.4	6.47	0.970658	1.11493	0.994654	1.02809	0.985184	0.978359	0.957153	1.01065	0.975315	Quantified
ENSRNOP00000013315	WASH complex subunit 5	Washc5	pep chromosome:Rnor_6.0:7:99625619:99677268:-1 gene:ENSRNOG00000009739.8 transcript:ENSRNOT00000013315.8 gene_biotype:protein_coding transcript_biotype:protein_coding gene_symbol:Washc5 description:WASH complex subunit 5 [Source:RGD Symbol;Acc:1564420]	19	22	22	31	1159	134.1	7.47	1.00513	0.992503	0.988195	0.983315	1.00647	1.00004	1.00161	1.02139	1.01557	Quantified
ENSRNOP00000072636	myosin heavy chain 14	Myh14	pep chromosome:Rnor_6.0:1:100608966:100669684:-1 gene:ENSRNOG00000020014.7 transcript:ENSRNOT00000091760.1 gene_biotype:protein_coding transcript_biotype:protein_coding gene_symbol:Myh14 description:myosin heavy chain 14 [Source:RGD Symbol;Acc:1306821]	6	5	13	48	2000	228.8	5.55	0.896089	0.988583	1.15618	0.993341	0.929749	0.973201	1.01492	1.07447	0.988056	Quantified
ENSRNOP00000027753	nucleobindin 2	Nucb2	pep chromosome:Rnor_6.0:1:185104656:185143272:-1 gene:ENSRNOG00000020456.5 transcript:ENSRNOT00000027752.5 gene_biotype:protein_coding transcript_biotype:protein_coding gene_symbol:Nucb2 description:nucleobindin 2 [Source:RGD Symbol;Acc:620888]	49	19	19	31	420	50.1	5.11	1.0174	0.990504	1.07519	1.04801	1.0231	0.962167	0.994678	0.961257	0.938778	Quantified
ENSRNOP00000011330	2,4-dienoyl-CoA reductase 1	Decr1	pep chromosome:Rnor_6.0:5:29573898:29601748:-1 gene:ENSRNOG00000008236.6 transcript:ENSRNOT00000011330.6 gene_biotype:protein_coding transcript_biotype:protein_coding gene_symbol:Decr1 description:2,4-dienoyl-CoA reductase 1 [Source:RGD Symbol;Acc:70999]	37	11	11	45	335	36.1	8.94	0.885681	0.914875	0.922511	0.889352	1.03609	1.09764	1.05372	1.01993	1.19974	Quantified
ENSRNOP00000012455	alpha-L-fucosidase 1	Fuca1	pep chromosome:Rnor_6.0:5:154269118:154286544:1 gene:ENSRNOG00000009325.5 transcript:ENSRNOT00000012455.5 gene_biotype:protein_coding transcript_biotype:protein_coding gene_symbol:Fuca1 description:alpha-L-fucosidase 1 [Source:RGD Symbol;Acc:2636]	33	13	13	45	462	53.4	6.24	1.02162	1.00406	0.954215	1.05816	0.98409	0.969907	0.978613	1.04149	1.00257	Quantified
ENSRNOP00000004756	apolipoprotein H	Apoh	pep chromosome:Rnor_6.0:10:96639924:96653938:1 gene:ENSRNOG00000003566.7 transcript:ENSRNOT00000004756.7 gene_biotype:protein_coding transcript_biotype:protein_coding gene_symbol:Apoh description:apolipoprotein H [Source:RGD Symbol;Acc:1310625]	45	13	13	42	345	38.4	8.21	0.952616	1.01224	1.0074	1.01006	0.949384	0.988103	0.980717	1.02602	1.08997	Quantified
ENSRNOP00000051840	Rho GDP dissociation inhibitor alpha	Arhgdia	pep chromosome:Rnor_6.0:10:109754004:109757550:-1 gene:ENSRNOG00000036688.2 transcript:ENSRNOT00000054957.2 gene_biotype:protein_coding transcript_biotype:protein_coding gene_symbol:Arhgdia description:Rho GDP dissociation inhibitor alpha [Source:RGD Symbol;Acc:1359547]	58	10	10	44	204	23.4	5.2	1.04089	1.03357	0.997813	1.00535	0.990336	1.02517	0.978077	0.986812	0.956104	Quantified
ENSRNOP00000025433	proteasome 26S subunit, non-ATPase 5	Psmd5	pep chromosome:Rnor_6.0:3:13916203:13933658:-1 gene:ENSRNOG00000018809.7 transcript:ENSRNOT00000025433.6 gene_biotype:protein_coding transcript_biotype:protein_coding gene_symbol:Psmd5 description:proteasome 26S subunit, non-ATPase 5 [Source:RGD Symbol;Acc:1308434]	34	14	14	31	504	55.8	5.27	1.01846	1.02491	0.980361	1.0189	0.985848	0.99422	0.971935	1.0123	1.0078	Quantified
ENSRNOP00000072026	DEAD-box helicase 23	Ddx23	pep chromosome:Rnor_6.0:7:140325431:140342727:-1 gene:ENSRNOG00000060154.1 transcript:ENSRNOT00000089612.1 gene_biotype:protein_coding transcript_biotype:protein_coding gene_symbol:Ddx23 description:DEAD-box helicase 23 [Source:RGD Symbol;Acc:1308685]	24	21	21	29	819	95.4	9.58	1.03422	0.998192	0.978743	0.993194	1.00494	0.970601	1.00395	0.986278	1.04283	Quantified
ENSRNOP00000014178	cathepsin B	Ctsb	pep chromosome:Rnor_6.0:15:46316741:46337612:1 gene:ENSRNOG00000010331.5 transcript:ENSRNOT00000014177.5 gene_biotype:protein_coding transcript_biotype:protein_coding gene_symbol:Ctsb description:cathepsin B [Source:RGD Symbol;Acc:621509]	36	9	9	37	339	37.5	5.76	1.01474	0.983783	0.943744	1.00825	0.991171	1.06241	1.02063	0.986451	1.00491	Quantified
ENSRNOP00000061371	inositol polyphosphate phosphatase-like 1	Inppl1	pep chromosome:Rnor_6.0:1:166899894:166911694:-1 gene:ENSRNOG00000019730.7 transcript:ENSRNOT00000066915.3 gene_biotype:protein_coding transcript_biotype:protein_coding gene_symbol:Inppl1 description:inositol polyphosphate phosphatase-like 1 [Source:RGD Symbol;Acc:68396]	19	20	20	26	1022	114	7.55	0.987495	1.00408	1.02175	1.04058	1.01434	1.03278	0.965216	0.983554	0.965368	Quantified
ENSRNOP00000017579	methionyl aminopeptidase 1	Metap1	pep chromosome:Rnor_6.0:2:243744620:243777673:-1 gene:ENSRNOG00000012947.5 transcript:ENSRNOT00000017579.5 gene_biotype:protein_coding transcript_biotype:protein_coding gene_symbol:Metap1 description:methionyl aminopeptidase 1 [Source:RGD Symbol;Acc:1305545]	41	12	12	26	386	43.2	7.17	1.01312	0.993542	1.04169	0.999143	1.00278	0.978537	0.983263	0.996517	1.00436	Quantified
ENSRNOP00000060240	chloride intracellular channel 1	Clic1	pep chromosome:Rnor_6.0:20:5040337:5049166:1 gene:ENSRNOG00000029682.5 transcript:ENSRNOT00000068435.3 gene_biotype:protein_coding transcript_biotype:protein_coding gene_symbol:Clic1 description:chloride intracellular channel 1 [Source:RGD Symbol;Acc:1303043]	61	12	12	36	241	27	5.17	1.05245	1.05663	1.04257	1.01279	0.968604	1.00226	0.947485	0.993456	0.937199	Quantified
ENSRNOP00000004799	peroxiredoxin 2	Prdx2	pep chromosome:Rnor_6.0:19:26084903:26090094:1 gene:ENSRNOG00000003520.5 transcript:ENSRNOT00000004799.5 gene_biotype:protein_coding transcript_biotype:protein_coding gene_symbol:Prdx2 description:peroxiredoxin 2 [Source:RGD Symbol;Acc:3838]	61	10	10	56	198	21.8	5.59	0.985173	1.0077	0.962349	1.04359	0.969263	1.06788	0.9653	1.01643	1.00044	Quantified
ENSRNOP00000001049	ATP binding cassette subfamily F member 1	Abcf1	pep chromosome:Rnor_6.0:20:3309899:3322825:1 gene:ENSRNOG00000000799.7 transcript:ENSRNOT00000001049.7 gene_biotype:protein_coding transcript_biotype:protein_coding gene_symbol:Abcf1 description:ATP binding cassette subfamily F member 1 [Source:RGD Symbol;Acc:620286]	21	18	18	28	839	95.2	6.65	0.941625	0.94498	0.988324	0.913707	1.07332	1.16509	0.924067	1.02619	1.04268	Quantified
ENSRNOP00000021048	myosin light chain 12A	Myl12a	pep chromosome:Rnor_6.0:9:119325283:119332967:-1 gene:ENSRNOG00000015278.7 transcript:ENSRNOT00000021048.7 gene_biotype:protein_coding transcript_biotype:protein_coding gene_symbol:Myl12a description:myosin light chain 12A [Source:RGD Symbol;Acc:1309537]	66	2	9	70	172	19.9	4.81	0.880431	1.09579	1.02096	1.03143	0.941209	0.979543	1.06756	1.01963	0.978933	Quantified
ENSRNOP00000060074	protein kinase C and casein kinase substrate in neurons 2	Pacsin2	pep chromosome:Rnor_6.0:7:124225704:124256077:-1 gene:ENSRNOG00000009756.8 transcript:ENSRNOT00000067913.4 gene_biotype:protein_coding transcript_biotype:protein_coding gene_symbol:Pacsin2 description:protein kinase C and casein kinase substrate in neurons 2 [Source:RGD Symbol;Acc:69411]	34	14	16	44	488	55.9	5.14	0.99908	0.978733	0.986239	0.977931	1.00629	1.0015	1.01768	1.02002	1.02673	Quantified
ENSRNOP00000015186	peroxiredoxin 3	Prdx3	pep chromosome:Rnor_6.0:1:282238773:282251257:-1 gene:ENSRNOG00000010958.5 transcript:ENSRNOT00000015186.5 gene_biotype:protein_coding transcript_biotype:protein_coding gene_symbol:Prdx3 description:peroxiredoxin 3 [Source:RGD Symbol;Acc:620040]	55	10	10	68	257	28.3	7.55	0.904569	0.954617	0.929906	0.923735	1.0508	1.11828	1.06121	1.00915	1.0662	Quantified
ENSRNOP00000018982	apoptotic chromatin condensation inducer 1	Acin1	pep chromosome:Rnor_6.0:15:33288374:33333417:-1 gene:ENSRNOG00000013533.7 transcript:ENSRNOT00000018982.6 gene_biotype:protein_coding transcript_biotype:protein_coding gene_symbol:Acin1 description:apoptotic chromatin condensation inducer 1 [Source:RGD Symbol;Acc:1311945]	16	25	25	38	1339	150.9	5.86	1.01033	1.0098	1.01943	1.02154	0.998566	0.954947	0.995393	1.00811	0.994536	Quantified
ENSRNOP00000022550	G protein subunit alpha i2	Gnai2	pep chromosome:Rnor_6.0:8:116370744:116391307:-1 gene:ENSRNOG00000016592.6 transcript:ENSRNOT00000022550.6 gene_biotype:protein_coding transcript_biotype:protein_coding gene_symbol:Gnai2 description:G protein subunit alpha i2 [Source:RGD Symbol;Acc:620243]	45	8	12	34	355	40.5	5.45	1.02676	1.00189	0.937507	0.965413	0.990128	1.04313	1.02068	0.989556	1.04035	Quantified
ENSRNOP00000073375	microtubule-associated protein 1A	Map1a	pep chromosome:Rnor_6.0:3:113251778:113272186:1 gene:ENSRNOG00000014230.6 transcript:ENSRNOT00000083005.1 gene_biotype:protein_coding transcript_biotype:protein_coding gene_symbol:Map1a description:microtubule-associated protein 1A [Source:RGD Symbol;Acc:3042]	8	21	22	25	3014	325.4	4.97	0.999715	1.00118	1.00363	0.960018	1.00035	1.05327	0.995049	1.04251	0.959663	Quantified
ENSRNOP00000014377	SEC13 homolog, nuclear pore and COPII coat complex component	Sec13	pep chromosome:Rnor_6.0:4:145686193:145699577:-1 gene:ENSRNOG00000010628.4 transcript:ENSRNOT00000014377.4 gene_biotype:protein_coding transcript_biotype:protein_coding gene_symbol:Sec13 description:SEC13 homolog, nuclear pore and COPII coat complex component [Source:RGD Symbol;Acc:1359555]	39	13	13	28	322	35.5	5.38	1.02998	0.994559	0.996692	1.01792	1.01165	1.01057	1.01134	0.95771	0.982772	Quantified
ENSRNOP00000015102	isocitrate dehydrogenase (NAD(+)) 3 catalytic subunit alpha	Idh3a	pep chromosome:Rnor_6.0:8:59164572:59183908:1 gene:ENSRNOG00000010277.4 transcript:ENSRNOT00000015102.4 gene_biotype:protein_coding transcript_biotype:protein_coding gene_symbol:Idh3a description:isocitrate dehydrogenase (NAD(+)) 3 catalytic subunit alpha [Source:RGD Symbol;Acc:70889]	38	15	15	60	382	41.2	6.93	0.992885	0.954269	1.00042	0.909206	1.03405	1.03091	1.04549	0.965992	1.08045	Quantified
ENSRNOP00000044696	ubiquinol-cytochrome c reductase core protein 1	Uqcrc1	pep chromosome:Rnor_6.0:8:117679278:117691071:1 gene:ENSRNOG00000032134.4 transcript:ENSRNOT00000042114.4 gene_biotype:protein_coding transcript_biotype:protein_coding gene_symbol:Uqcrc1 description:ubiquinol-cytochrome c reductase core protein 1 [Source:RGD Symbol;Acc:1303314]	31	13	14	38	480	52.8	5.88	1.00378	1.00378	0.92617	0.982174	0.986219	0.95141	0.986423	1.03654	1.13872	Quantified
ENSRNOP00000011898	argonaute RISC catalytic component 2	Ago2	pep chromosome:Rnor_6.0:7:114339434:114380613:-1 gene:ENSRNOG00000008533.4 transcript:ENSRNOT00000011898.4 gene_biotype:protein_coding transcript_biotype:protein_coding gene_symbol:Ago2 description:argonaute RISC catalytic component 2 [Source:RGD Symbol;Acc:621255]	24	12	18	21	880	99.5	9.14	1.0028	0.993248	0.991824	0.987079	0.988572	1.01313	1.00449	0.992985	1.04066	Quantified
ENSRNOP00000016410	zinc metallopeptidase STE24	Zmpste24	pep chromosome:Rnor_6.0:5:139983680:140015541:-1 gene:ENSRNOG00000012054.5 transcript:ENSRNOT00000016410.5 gene_biotype:protein_coding transcript_biotype:protein_coding gene_symbol:Zmpste24 description:zinc metallopeptidase STE24 [Source:RGD Symbol;Acc:1305570]	26	12	12	49	475	54.8	7.23	0.969479	0.939439	0.941257	0.921906	1.0162	1.09887	1.05774	1.02186	1.05037	Quantified
ENSRNOP00000010429	ADP-ribosylation factor 5	Arf5	pep chromosome:Rnor_6.0:4:55715744:55718670:1 gene:ENSRNOG00000007806.2 transcript:ENSRNOT00000010429.2 gene_biotype:protein_coding transcript_biotype:protein_coding gene_symbol:Arf5 description:ADP-ribosylation factor 5 [Source:RGD Symbol;Acc:621278]	64	4	10	82	180	20.5	6.79	1.02251	0.989888	1.01333	0.995275	0.98317	1.00947	0.994372	1.00017	1.00594	Quantified
ENSRNOP00000053848	activating signal cointegrator 1 complex subunit 3	Ascc3	pep chromosome:Rnor_6.0:20:55253686:55556473:1 gene:ENSRNOG00000037604.4 transcript:ENSRNOT00000057016.4 gene_biotype:protein_coding transcript_biotype:protein_coding gene_symbol:Ascc3 description:activating signal cointegrator 1 complex subunit 3 [Source:RGD Symbol;Acc:1307995]	11	24	24	27	2201	250.4	6.92	1.0228	0.980997	0.994897	0.976181	1.00392	1.0213	1.00038	1.0209	0.992865	Quantified
ENSRNOP00000072637	dedicator of cytokinesis 7	Dock7	pep chromosome:Rnor_6.0:5:117596341:117780777:-1 gene:ENSRNOG00000008298.8 transcript:ENSRNOT00000081971.1 gene_biotype:protein_coding transcript_biotype:protein_coding gene_symbol:Dock7 description:dedicator of cytokinesis 7 [Source:RGD Symbol;Acc:1309790]	10	19	23	29	2129	241.1	6.79	0.978954	0.945839	1.02259	1.00274	1.01172	0.994375	0.994249	1.08605	0.978007	Quantified
ENSRNOP00000053252	collagen type VI alpha 6 chain	Col6a6	pep chromosome:Rnor_6.0:8:114353825:114449956:-1 gene:ENSRNOG00000023007.6 transcript:ENSRNOT00000056414.4 gene_biotype:protein_coding transcript_biotype:protein_coding gene_symbol:Col6a6 description:collagen type VI alpha 6 chain [Source:RGD Symbol;Acc:1309172]	9	13	19	29	2264	246.6	6.71	0.893348	1.10196	0.934248	1.0203	1.04087	1.07371	0.965454	1.08027	0.908759	Quantified
ENSRNOP00000013354	carbonic anhydrase 2	Car2	pep chromosome:Rnor_6.0:2:88097720:88113029:-1 gene:ENSRNOG00000009629.6 transcript:ENSRNOT00000013354.6 gene_biotype:protein_coding transcript_biotype:protein_coding gene_symbol:Car2 description:carbonic anhydrase 2 [Source:RGD Symbol;Acc:2240]	53	11	11	35	260	29.1	7.4	0.928146	0.864606	1.01322	1.03813	0.994059	1.26769	0.93823	1.03699	0.942851	Quantified
ENSRNOP00000059209	epidermal growth factor receptor pathway substrate 15	Eps15	pep chromosome:Rnor_6.0:5:128923934:129022054:1 gene:ENSRNOG00000010299.7 transcript:ENSRNOT00000064145.2 gene_biotype:protein_coding transcript_biotype:protein_coding gene_symbol:Eps15 description:epidermal growth factor receptor pathway substrate 15 [Source:RGD Symbol;Acc:1305550]	22	18	18	38	897	98.7	4.68	1.02062	1.06035	1.01531	1.00413	0.982984	0.988359	0.974109	0.975241	0.992483	Quantified
ENSRNOP00000070817	eukaryotic translation initiation factor 2 subunit gamma	Eif2s3	pep chromosome:Rnor_6.0:X:63268037:63291107:-1 gene:ENSRNOG00000060793.1 transcript:ENSRNOT00000092019.1 gene_biotype:protein_coding transcript_biotype:protein_coding gene_symbol:Eif2s3 description:eukaryotic translation initiation factor 2 subunit gamma [Source:RGD Symbol;Acc:1561279]	41	16	16	33	472	51	8.4	1.05217	1.02449	0.941154	0.999518	0.965491	0.982607	1.00178	0.998615	1.04837	Quantified
ENSRNOP00000036882	eukaryotic translation elongation factor 1 beta 2	Eef1b2	pep chromosome:Rnor_6.0:9:69953440:69956160:1 gene:ENSRNOG00000024186.4 transcript:ENSRNOT00000034740.4 gene_biotype:protein_coding transcript_biotype:protein_coding gene_symbol:Eef1b2 description:eukaryotic translation elongation factor 1 beta 2 [Source:RGD Symbol;Acc:1311415]	53	8	10	33	225	24.7	4.72	1.06109	0.978406	1.00558	0.98026	0.954284	1.05575	1.01814	0.978775	0.982143	Quantified
ENSRNOP00000061946	ATP synthase F1 subunit gamma	Atp5f1c	pep chromosome:Rnor_6.0:17:72209373:72231551:1 gene:ENSRNOG00000019223.8 transcript:ENSRNOT00000064802.3 gene_biotype:protein_coding transcript_biotype:protein_coding gene_symbol:Atp5f1c description:ATP synthase F1 subunit gamma [Source:RGD Symbol;Acc:620011]	38	11	11	62	298	33	9.01	0.999365	0.989784	0.932653	0.973121	0.982851	0.977452	1.02667	1.01506	1.11805	Quantified
ENSRNOP00000003691	UDP-glucose 6-dehydrogenase	Ugdh	pep chromosome:Rnor_6.0:14:44479614:44502845:1 gene:ENSRNOG00000002643.3 transcript:ENSRNOT00000003691.3 gene_biotype:protein_coding transcript_biotype:protein_coding gene_symbol:Ugdh description:UDP-glucose 6-dehydrogenase [Source:RGD Symbol;Acc:621879]	37	15	15	25	493	54.9	7.34	1.08469	0.972358	0.964825	1.03157	0.939182	1.06757	0.976183	0.990892	0.988908	Quantified
ENSRNOP00000053546	procollagen lysine, 2-oxoglutarate 5-dioxygenase 2	Plod2	pep chromosome:Rnor_6.0:8:99977334:100059736:1 gene:ENSRNOG00000030183.5 transcript:ENSRNOT00000056704.3 gene_biotype:protein_coding transcript_biotype:protein_coding gene_symbol:Plod2 description:procollagen lysine, 2-oxoglutarate 5-dioxygenase 2 [Source:RGD Symbol;Acc:3353]	22	15	16	35	758	87	6.65	1.01967	0.987541	0.985915	1.04136	0.914074	1.01318	0.989423	1.01198	1.05332	Quantified
ENSRNOP00000064500	glucosidase, alpha, acid	Gaa	pep chromosome:Rnor_6.0:10:108395860:108413059:1 gene:ENSRNOG00000047656.2 transcript:ENSRNOT00000075796.2 gene_biotype:protein_coding transcript_biotype:protein_coding gene_symbol:Gaa description:glucosidase, alpha, acid [Source:RGD Symbol;Acc:735227]	18	15	15	28	953	106.1	5.68	0.99028	1.03611	0.925844	0.984461	1.012	0.944474	1.00577	1.03484	1.08038	Quantified
ENSRNOP00000018259	dihydrofolate reductase	Dhfr	pep chromosome:Rnor_6.0:2:21931493:21962453:1 gene:ENSRNOG00000013521.5 transcript:ENSRNOT00000018259.5 gene_biotype:protein_coding transcript_biotype:protein_coding gene_symbol:Dhfr description:dihydrofolate reductase [Source:RGD Symbol;Acc:2500]	70	12	12	51	187	21.6	7.33	1.06111	0.951256	0.997418	0.860187	1.01007	1.15263	1.03541	1.11489	0.832376	Quantified
ENSRNOP00000062590	Sec23 homolog B, coat complex II component	Sec23b	pep chromosome:Rnor_6.0:3:138715570:138757111:1 gene:ENSRNOG00000008411.6 transcript:ENSRNOT00000064723.3 gene_biotype:protein_coding transcript_biotype:protein_coding gene_symbol:Sec23b description:Sec23 homolog B, coat complex II component [Source:RGD Symbol;Acc:1310699]	21	12	15	28	767	86.3	6.93	1.00224	0.997493	1.02035	0.983097	0.983745	1.02572	0.996572	0.982978	1.02253	Quantified
ENSRNOP00000073414	nuclear distribution C, dynein complex regulator	Nudc	pep chromosome:Rnor_6.0:5:151754716:151768123:-1 gene:ENSRNOG00000051720.1 transcript:ENSRNOT00000079380.1 gene_biotype:protein_coding transcript_biotype:protein_coding gene_symbol:Nudc description:nuclear distribution C, dynein complex regulator [Source:RGD Symbol;Acc:3215]	52	18	18	30	332	38.4	5.38	1.03226	0.998419	1.11464	1.08161	0.967162	1.01124	0.934323	0.948577	0.925186	Quantified
ENSRNOP00000035966	lectin, mannose-binding, 1	Lman1	pep chromosome:Rnor_6.0:18:61685117:61707317:-1 gene:ENSRNOG00000024470.5 transcript:ENSRNOT00000032047.5 gene_biotype:protein_coding transcript_biotype:protein_coding gene_symbol:Lman1 description:lectin, mannose-binding, 1 [Source:RGD Symbol;Acc:71020]	28	14	14	25	517	58	6.34	1.01513	0.990283	0.981715	1.0508	0.986894	0.998127	1.00078	0.99409	0.996628	Quantified
ENSRNOP00000011069	3-hydroxyisobutyrate dehydrogenase	Hibadh	pep chromosome:Rnor_6.0:4:82604373:82702429:-1 gene:ENSRNOG00000008063.6 transcript:ENSRNOT00000011069.6 gene_biotype:protein_coding transcript_biotype:protein_coding gene_symbol:Hibadh description:3-hydroxyisobutyrate dehydrogenase [Source:RGD Symbol;Acc:708399]	34	9	9	35	335	35.3	8.47	0.947588	0.967672	0.958347	0.974421	1.05214	1.02564	1.02188	1.02679	1.04112	Quantified
ENSRNOP00000008522	RAB2A, member RAS oncogene family	Rab2a	pep chromosome:Rnor_6.0:5:21632926:21695519:1 gene:ENSRNOG00000005963.7 transcript:ENSRNOT00000008522.5 gene_biotype:protein_coding transcript_biotype:protein_coding gene_symbol:Rab2a description:RAB2A, member RAS oncogene family [Source:RGD Symbol;Acc:68323]	67	5	13	61	206	22.8	6.54	0.95888	1.01767	0.955099	0.978713	1.03797	1.06396	1.01618	0.999133	0.988566	Quantified
ENSRNOP00000008211	carboxypeptidase Q	Cpq	pep chromosome:Rnor_6.0:7:71709157:72167417:1 gene:ENSRNOG00000005931.6 transcript:ENSRNOT00000008211.6 gene_biotype:protein_coding transcript_biotype:protein_coding gene_symbol:Cpq description:carboxypeptidase Q [Source:RGD Symbol;Acc:628610]	31	11	11	49	472	52	6.42	0.960579	0.970065	0.917883	1.00177	1.04836	0.991057	1.05859	1.0375	1.02877	Quantified
ENSRNOP00000061365	oxysterol binding protein	Osbp	pep chromosome:Rnor_6.0:1:228395558:228425361:1 gene:ENSRNOG00000021057.6 transcript:ENSRNOT00000065411.2 gene_biotype:protein_coding transcript_biotype:protein_coding gene_symbol:Osbp description:oxysterol binding protein [Source:RGD Symbol;Acc:1308069]	28	19	19	28	682	77.8	6.83	0.954812	0.995295	0.987404	0.963853	1.01166	0.990212	1.02456	1.0465	1.04042	Quantified
ENSRNOP00000025282	protein phosphatase 1 catalytic subunit alpha	Ppp1ca	pep chromosome:Rnor_6.0:1:219439953:219443570:1 gene:ENSRNOG00000018708.6 transcript:ENSRNOT00000025282.6 gene_biotype:protein_coding transcript_biotype:protein_coding gene_symbol:Ppp1ca description:protein phosphatase 1 catalytic subunit alpha [Source:RGD Symbol;Acc:3375]	53	3	15	47	330	37.5	6.33	0.994692	1.00983	0.972233	1.02314	1.00818	0.969232	1.00923	1.00686	1.02039	Quantified
ENSRNOP00000068991	thyroid hormone receptor interactor 12	Trip12	pep chromosome:Rnor_6.0:9:92307591:92405117:-1 gene:ENSRNOG00000016963.8 transcript:ENSRNOT00000079452.1 gene_biotype:protein_coding transcript_biotype:protein_coding gene_symbol:Trip12 description:thyroid hormone receptor interactor 12 [Source:RGD Symbol;Acc:1306607]	10	21	21	31	2038	225.5	8.5	1.02217	1.05267	1.01023	0.981841	0.97326	0.985175	0.995981	0.992997	0.999074	Quantified
ENSRNOP00000012665	LDL receptor related protein associated protein 1	Lrpap1	pep chromosome:Rnor_6.0:14:80911270:80924831:1 gene:ENSRNOG00000009313.5 transcript:ENSRNOT00000012665.5 gene_biotype:protein_coding transcript_biotype:protein_coding gene_symbol:Lrpap1 description:LDL receptor related protein associated protein 1 [Source:RGD Symbol;Acc:620700]	48	19	19	41	360	42	7.37	1.02139	0.990849	0.985091	1.03439	0.973821	0.956817	0.999305	1.00523	1.04681	Quantified
ENSRNOP00000047905	inositol 1,4,5-trisphosphate receptor, type 2	Itpr2	pep chromosome:Rnor_6.0:4:180538389:180722358:-1 gene:ENSRNOG00000001804.7 transcript:ENSRNOT00000040645.5 gene_biotype:protein_coding transcript_biotype:protein_coding gene_symbol:Itpr2 description:inositol 1,4,5-trisphosphate receptor, type 2 [Source:RGD Symbol;Acc:69649]	11	16	25	30	2058	234	6.54	0.999826	1.02001	0.997475	0.967608	0.965661	1.01817	0.999338	1.01395	1.03325	Quantified
ENSRNOP00000028100	heterogeneous nuclear ribonucleoprotein U-like 1	Hnrnpul1	pep chromosome:Rnor_6.0:1:82512745:82546937:-1 gene:ENSRNOG00000020683.7 transcript:ENSRNOT00000028100.7 gene_biotype:protein_coding transcript_biotype:protein_coding gene_symbol:Hnrnpul1 description:heterogeneous nuclear ribonucleoprotein U-like 1 [Source:RGD Symbol;Acc:1307456]	25	21	21	32	859	95.9	6.64	1.00357	1.02488	1.00631	1.01354	0.990858	0.908456	0.998428	1.01059	1.0555	Quantified
ENSRNOP00000013176	apurinic/apyrimidinic endodeoxyribonuclease 1	Apex1	pep chromosome:Rnor_6.0:15:27849979:27852079:1 gene:ENSRNOG00000009663.5 transcript:ENSRNOT00000013176.5 gene_biotype:protein_coding transcript_biotype:protein_coding gene_symbol:Apex1 description:apurinic/apyrimidinic endodeoxyribonuclease 1 [Source:RGD Symbol;Acc:2126]	47	11	11	29	317	35.5	7.91	0.997758	1.01011	0.97393	1.02408	1.00514	0.936787	1.00928	0.999326	1.05666	Quantified
ENSRNOP00000021397	dipeptidase 1	Dpep1	pep chromosome:Rnor_6.0:19:55982740:55998208:1 gene:ENSRNOG00000015880.3 transcript:ENSRNOT00000021397.3 gene_biotype:protein_coding transcript_biotype:protein_coding gene_symbol:Dpep1 description:dipeptidase 1 [Source:RGD Symbol;Acc:620324]	37	11	11	56	410	45.5	6.07	1.00227	0.996797	0.906074	0.981508	1.09182	0.891699	1.07601	1.03572	1.02822	Quantified
ENSRNOP00000037642	peptidase, mitochondrial processing alpha subunit	Pmpca	pep chromosome:Rnor_6.0:3:3834078:3842078:1 gene:ENSRNOG00000026775.6 transcript:ENSRNOT00000031607.4 gene_biotype:protein_coding transcript_biotype:protein_coding gene_symbol:Pmpca description:peptidase, mitochondrial processing alpha subunit [Source:RGD Symbol;Acc:727897]	38	19	19	36	524	58.1	6.9	0.929386	0.982322	1.03416	1.06366	1.04401	0.9442	0.975057	0.989826	1.05126	Quantified
ENSRNOP00000075002	FKBP prolyl isomerase 11	Fkbp11	pep chromosome:Rnor_6.0:7:140398199:140437467:-1 gene:ENSRNOG00000054775.1 transcript:ENSRNOT00000087181.1 gene_biotype:protein_coding transcript_biotype:protein_coding gene_symbol:Fkbp11 description:FKBP prolyl isomerase 11 [Source:RGD Symbol;Acc:1306161]	57	4	9	93	187	21.1	7.37	0.992812	1.04587	0.976062	1.00281	1.00041	0.971846	0.994309	1.0228	1.00715	Quantified
ENSRNOP00000010197	RAB11B, member RAS oncogene family	Rab11b	pep chromosome:Rnor_6.0:7:18598880:18612147:-1 gene:ENSRNOG00000007648.5 transcript:ENSRNOT00000010197.5 gene_biotype:protein_coding transcript_biotype:protein_coding gene_symbol:Rab11b description:RAB11B, member RAS oncogene family [Source:RGD Symbol;Acc:68369]	54	12	12	45	218	24.5	5.94	1.04276	1.00347	0.977683	0.982234	0.967354	1.03568	0.987962	0.988103	1.03	Quantified
ENSRNOP00000035797	peptidylprolyl isomerase D	Ppid	pep chromosome:Rnor_6.0:2:178354890:178366685:1 gene:ENSRNOG00000027408.4 transcript:ENSRNOT00000037890.4 gene_biotype:protein_coding transcript_biotype:protein_coding gene_symbol:Ppid description:peptidylprolyl isomerase D [Source:RGD Symbol;Acc:1303174]	35	15	15	43	370	40.7	7.17	1.01591	1.02596	1.04256	1.03238	0.998196	0.981452	0.971011	0.962218	0.983298	Quantified
ENSRNOP00000071536		AABR07071244.1	pep chromosome:Rnor_6.0:8:106586689:106602837:1 gene:ENSRNOG00000060723.1 transcript:ENSRNOT00000080434.1 gene_biotype:protein_coding transcript_biotype:protein_coding gene_symbol:AABR07071244.1	29	19	19	35	733	82.6	6.77	1.04938	0.963969	1.0098	0.997435	0.981435	1.01293	0.988354	0.983207	1.02743	Quantified
ENSRNOP00000062246	phosphoglucomutase 3	Pgm3	pep chromosome:Rnor_6.0:8:94226145:94243215:-1 gene:ENSRNOG00000009515.7 transcript:ENSRNOT00000067699.1 gene_biotype:protein_coding transcript_biotype:protein_coding gene_symbol:Pgm3 description:phosphoglucomutase 3 [Source:RGD Symbol;Acc:1305221]	36	20	20	31	552	60.8	6.77	0.992654	0.997154	1.0133	0.980066	0.995266	1.01969	1.01058	1.01695	0.988791	Quantified
ENSRNOP00000068716	EH-domain containing 3	Ehd3	pep chromosome:Rnor_6.0:6:25074955:25100977:1 gene:ENSRNOG00000007744.4 transcript:ENSRNOT00000084773.1 gene_biotype:protein_coding transcript_biotype:protein_coding gene_symbol:Ehd3 description:EH-domain containing 3 [Source:RGD Symbol;Acc:621762]	26	5	17	37	572	64.9	6.73	0.942646	1.01802	1.00219	1.00837	1.01783	1.01764	0.987264	1.0288	0.993017	Quantified
ENSRNOP00000060639	cullin 4B	Cul4b	pep chromosome:Rnor_6.0:X:124832628:124870329:-1 gene:ENSRNOG00000002585.6 transcript:ENSRNOT00000065023.2 gene_biotype:protein_coding transcript_biotype:protein_coding gene_symbol:Cul4b description:cullin 4B [Source:RGD Symbol;Acc:1564494]	19	12	21	30	971	110.7	8.44	1.01669	1.02351	1.0089	1.03403	0.991976	0.973871	0.972784	0.997034	0.994836	Quantified
ENSRNOP00000071300	acyl-CoA synthetase short-chain family member 3	Acss3	pep chromosome:Rnor_6.0:7:49047013:49250957:-1 gene:ENSRNOG00000004448.7 transcript:ENSRNOT00000082141.1 gene_biotype:protein_coding transcript_biotype:protein_coding gene_symbol:Acss3 description:acyl-CoA synthetase short-chain family member 3 [Source:RGD Symbol;Acc:1307051]	27	16	16	28	683	74.6	8.63	0.957001	0.991181	1.02498	1.00605	1.01685	1.03344	0.979324	0.979767	1.02707	Quantified
ENSRNOP00000073493	RAB1A, member RAS oncogene family	Rab1a	pep chromosome:Rnor_6.0:14:104475082:104500173:1 gene:ENSRNOG00000004992.7 transcript:ENSRNOT00000084481.1 gene_biotype:protein_coding transcript_biotype:protein_coding gene_symbol:Rab1a description:RAB1A, member RAS oncogene family [Source:RGD Symbol;Acc:619736]	64	6	11	40	205	22.7	6.21	1.0909	1.0446	0.967658	0.939331	0.966615	1.05084	0.964255	1.00376	0.986813	Quantified
ENSRNOP00000019931	synaptopodin 2	Synpo2	pep chromosome:Rnor_6.0:2:227255902:227411964:-1 gene:ENSRNOG00000014867.7 transcript:ENSRNOT00000019931.7 gene_biotype:protein_coding transcript_biotype:protein_coding gene_symbol:Synpo2 description:synaptopodin 2 [Source:RGD Symbol;Acc:1564779]	18	20	20	26	1262	135.9	8.51	0.918916	1.14229	0.956768	1.0673	1.06674	0.936186	1.06953	0.980509	0.873387	Quantified
ENSRNOP00000007558	casein kinase 2 alpha 1	Csnk2a1	pep chromosome:Rnor_6.0:3:147713821:147757862:1 gene:ENSRNOG00000005276.6 transcript:ENSRNOT00000007558.5 gene_biotype:protein_coding transcript_biotype:protein_coding gene_symbol:Csnk2a1 description:casein kinase 2 alpha 1 [Source:RGD Symbol;Acc:621663]	38	14	14	37	391	45	7.74	1.0649	1.02232	1.00089	0.997832	0.991469	0.967884	1.00475	0.96968	0.992002	Quantified
ENSRNOP00000030323	peroxiredoxin 6	Prdx6	pep chromosome:Rnor_6.0:13:79077033:79088127:-1 gene:ENSRNOG00000002896.7 transcript:ENSRNOT00000034583.6 gene_biotype:protein_coding transcript_biotype:protein_coding gene_symbol:Prdx6 description:peroxiredoxin 6 [Source:RGD Symbol;Acc:71005]	59	14	14	44	224	24.8	5.94	0.973408	1.02764	0.983701	1.04908	0.966516	0.982924	0.976233	1.04669	1.00972	Quantified
ENSRNOP00000030596	clathrin interactor 1	Clint1	pep chromosome:Rnor_6.0:10:30833914:31003910:1 gene:ENSRNOG00000005406.7 transcript:ENSRNOT00000035346.5 gene_biotype:protein_coding transcript_biotype:protein_coding gene_symbol:Clint1 description:clathrin interactor 1 [Source:RGD Symbol;Acc:1303328]	32	4	15	28	472	52.1	6.25	1.04421	0.992636	0.984603	1.01283	0.991784	1.07916	0.971747	0.998045	0.940839	Quantified
ENSRNOP00000072265	phosphatidylinositol 4-kinase alpha	Pi4ka	pep chromosome:Rnor_6.0:11:87858453:87973422:1 gene:ENSRNOG00000060045.1 transcript:ENSRNOT00000091117.1 gene_biotype:protein_coding transcript_biotype:protein_coding gene_symbol:Pi4ka description:phosphatidylinositol 4-kinase alpha [Source:RGD Symbol;Acc:621213]	11	24	24	30	2044	231.6	6.99	0.991191	0.980301	0.983758	0.997912	1.01666	1.0036	1.02568	1.00512	1.00983	Quantified
ENSRNOP00000072055	DnaJ heat shock protein family (Hsp40) member B1	Dnajb1	pep chromosome:Rnor_6.0:19:24747216:24750904:1 gene:ENSRNOG00000021824.5 transcript:ENSRNOT00000079106.1 gene_biotype:protein_coding transcript_biotype:protein_coding gene_symbol:Dnajb1 description:DnaJ heat shock protein family (Hsp40) member B1 [Source:RGD Symbol;Acc:1304725]	47	15	16	42	340	38.1	8.63	1.02643	0.970926	0.981996	0.956048	0.986022	1.07129	1.01207	0.989802	1.02106	Quantified
ENSRNOP00000003611	NME/NM23 nucleoside diphosphate kinase 2	Nme2	pep chromosome:Rnor_6.0:10:81648216:81653717:-1 gene:ENSRNOG00000002671.3 transcript:ENSRNOT00000003611.3 gene_biotype:protein_coding transcript_biotype:protein_coding gene_symbol:Nme2 description:NME/NM23 nucleoside diphosphate kinase 2 [Source:RGD Symbol;Acc:619877]	78	5	11	83	152	17.3	7.44	1.08186	1.00382	1.01885	1.03949	0.929893	1.04711	0.957605	0.995314	0.941159	Quantified
ENSRNOP00000042464	histone cluster 2 H2B family member E	Hist2h2be	pep chromosome:Rnor_6.0:2:198360998:198361378:1 gene:ENSRNOG00000045753.2 transcript:ENSRNOT00000046129.4 gene_biotype:protein_coding transcript_biotype:protein_coding gene_symbol:Hist2h2be description:histone cluster 2 H2B family member E [Source:RGD Symbol;Acc:1562346]	59	1	9	361	126	14	10.32	1.04575	1.05452	1.02626	0.963344	0.978091	0.839232	1.0522	0.992269	1.05641	Quantified
ENSRNOP00000004941	leucine rich repeat containing 59	Lrrc59	pep chromosome:Rnor_6.0:10:82352390:82367047:1 gene:ENSRNOG00000003524.4 transcript:ENSRNOT00000004941.4 gene_biotype:protein_coding transcript_biotype:protein_coding gene_symbol:Lrrc59 description:leucine rich repeat containing 59 [Source:RGD Symbol;Acc:1305092]	47	14	14	54	307	34.8	9.52	1.03561	0.988352	0.991759	0.982398	1.01008	1.00866	0.998147	0.994331	1.00421	Quantified
ENSRNOP00000073317	golgi integral membrane protein 4	Golim4	pep chromosome:Rnor_6.0:2:174322872:174413038:-1 gene:ENSRNOG00000024213.6 transcript:ENSRNOT00000089229.1 gene_biotype:protein_coding transcript_biotype:protein_coding gene_symbol:Golim4 description:golgi integral membrane protein 4 [Source:RGD Symbol;Acc:1310948]	24	17	17	25	687	80.5	4.92	1.00593	0.986133	0.97672	1.00885	1.02541	1.02594	0.995313	1.02503	0.965389	Quantified
ENSRNOP00000032909	solute carrier family 25 member 12	Slc25a12	pep chromosome:Rnor_6.0:3:57882370:57957346:-1 gene:ENSRNOG00000022922.6 transcript:ENSRNOT00000036728.6 gene_biotype:protein_coding transcript_biotype:protein_coding gene_symbol:Slc25a12 description:solute carrier family 25 member 12 [Source:RGD Symbol;Acc:1305181]	31	12	15	27	655	71.9	8.12	0.985811	0.988837	0.986051	0.977021	1.02681	1.01694	0.985557	1.01625	1.03178	Quantified
ENSRNOP00000011784	enoyl-CoA delta isomerase 1	Eci1	pep chromosome:Rnor_6.0:10:13797562:13810913:1 gene:ENSRNOG00000008843.4 transcript:ENSRNOT00000011784.4 gene_biotype:protein_coding transcript_biotype:protein_coding gene_symbol:Eci1 description:enoyl-CoA delta isomerase 1 [Source:RGD Symbol;Acc:61892]	37	11	11	48	289	32.2	9.54	0.962211	0.933827	1.07323	0.962805	1.04769	0.999444	1.04221	0.984771	1.00606	Quantified
ENSRNOP00000004283	proteasome 26S subunit, non-ATPase 12	Psmd12	pep chromosome:Rnor_6.0:10:95706685:95725812:1 gene:ENSRNOG00000003117.6 transcript:ENSRNOT00000004283.4 gene_biotype:protein_coding transcript_biotype:protein_coding gene_symbol:Psmd12 description:proteasome 26S subunit, non-ATPase 12 [Source:RGD Symbol;Acc:1359305]	34	15	15	49	456	52.9	7.36	0.98762	1.01481	0.977207	0.990879	0.995029	0.985128	1.03139	1.01677	1.01515	Quantified
ENSRNOP00000026783	caveolae associated protein 1	Cavin1	pep chromosome:Rnor_6.0:10:88860733:88874528:-1 gene:ENSRNOG00000019778.6 transcript:ENSRNOT00000026783.5 gene_biotype:protein_coding transcript_biotype:protein_coding gene_symbol:Cavin1 description:caveolae associated protein 1 [Source:RGD Symbol;Acc:1307685]	38	16	16	37	392	43.9	5.52	0.944241	1.08199	0.988143	0.940256	1.11173	0.956127	1.05325	0.973286	0.961687	Quantified
ENSRNOP00000024093	aldehyde dehydrogenase family 1, subfamily A7	Aldh1a7	pep chromosome:Rnor_6.0:1:240562423:240601744:-1 gene:ENSRNOG00000017878.7 transcript:ENSRNOT00000024093.7 gene_biotype:protein_coding transcript_biotype:protein_coding gene_symbol:Aldh1a7 description:aldehyde dehydrogenase family 1, subfamily A7 [Source:RGD Symbol;Acc:620252]	23	2	11	47	499	54.7	7.14	0.939842	0.98942	1.2428	1.05136	1.05571	0.97056	0.950363	0.887814	0.922298	Quantified
ENSRNOP00000055224	NADH:ubiquinone oxidoreductase core subunit S2	Ndufs2	pep chromosome:Rnor_6.0:13:89606840:89619398:-1 gene:ENSRNOG00000038372.4 transcript:ENSRNOT00000058423.4 gene_biotype:protein_coding transcript_biotype:protein_coding gene_symbol:Ndufs2 description:NADH:ubiquinone oxidoreductase core subunit S2 [Source:RGD Symbol;Acc:1307109]	33	13	13	42	463	52.5	6.99	0.992809	0.980999	1.00736	1.00614	1.02087	0.978635	1.00787	1.00837	1.01027	Quantified
ENSRNOP00000062056	ankyrin 1	Ank1	pep chromosome:Rnor_6.0:16:73681422:73827488:-1 gene:ENSRNOG00000018241.6 transcript:ENSRNOT00000064070.2 gene_biotype:protein_coding transcript_biotype:protein_coding gene_symbol:Ank1 description:ankyrin 1 [Source:RGD Symbol;Acc:1309620]	14	19	21	28	1707	187	6.7	0.988697	0.940379	0.974527	1.0115	1.01772	1.14495	0.95259	1.01364	0.975152	Quantified
ENSRNOP00000059847	actin, beta-like 2	Actbl2	pep chromosome:Rnor_6.0:2:42829413:42832160:1 gene:ENSRNOG00000043292.1 transcript:ENSRNOT00000065528.1 gene_biotype:protein_coding transcript_biotype:protein_coding gene_symbol:Actbl2 description:actin, beta-like 2 [Source:RGD Symbol;Acc:1309504]	23	2	8	346	376	41.9	5.49	0.962093	0.930135	1.07067	1.0358	0.999524	1.10547	0.992487	0.949273	0.971181	Quantified
ENSRNOP00000006917	ATPase H+ transporting V1 subunit C1	Atp6v1c1	pep chromosome:Rnor_6.0:7:77678968:77716408:1 gene:ENSRNOG00000004846.5 transcript:ENSRNOT00000006917.5 gene_biotype:protein_coding transcript_biotype:protein_coding gene_symbol:Atp6v1c1 description:ATPase H+ transporting V1 subunit C1 [Source:RGD Symbol;Acc:1311082]	39	17	17	36	382	43.9	7.46	1.05723	1.07281	0.835192	1.0047	0.978143	1.02803	1.02731	1.01245	1.00002	Quantified
ENSRNOP00000016520	SAMM50 sorting and assembly machinery component	Samm50	pep chromosome:Rnor_6.0:7:125058897:125082505:1 gene:ENSRNOG00000011952.6 transcript:ENSRNOT00000016520.6 gene_biotype:protein_coding transcript_biotype:protein_coding gene_symbol:Samm50 description:SAMM50 sorting and assembly machinery component [Source:RGD Symbol;Acc:1303219]	35	15	15	34	469	51.9	6.8	0.987574	0.983757	0.961982	0.951186	1.01074	0.993266	1.02197	1.00132	1.1028	Quantified
ENSRNOP00000027497	ATPase Na+/K+ transporting subunit alpha 3	Atp1a3	pep chromosome:Rnor_6.0:1:81852429:81881549:-1 gene:ENSRNOG00000020263.6 transcript:ENSRNOT00000027497.6 gene_biotype:protein_coding transcript_biotype:protein_coding gene_symbol:Atp1a3 description:ATPase Na+/K+ transporting subunit alpha 3 [Source:RGD Symbol;Acc:2169]	17	3	14	33	1013	111.6	5.41	1.27906	1.0316	0.697356	0.668213	1.34159	1.22787	0.685153	0.709465	1.37681	Quantified
ENSRNOP00000074371	aldehyde dehydrogenase 3 family, member B1	Aldh3b1	pep chromosome:Rnor_6.0:1:219145680:219186860:-1 gene:ENSRNOG00000017512.7 transcript:ENSRNOT00000085312.1 gene_biotype:protein_coding transcript_biotype:protein_coding gene_symbol:Aldh3b1 description:aldehyde dehydrogenase 3 family, member B1 [Source:RGD Symbol;Acc:1359546]	31	14	15	44	521	58.1	6.95	0.89791	1.02958	0.873058	0.918343	1.01785	0.956092	1.02263	1.06146	1.24057	Quantified
ENSRNOP00000074340	nucleoporin 155	Nup155	pep chromosome:Rnor_6.0:2:57206613:57258295:1 gene:ENSRNOG00000013411.6 transcript:ENSRNOT00000082694.1 gene_biotype:protein_coding transcript_biotype:protein_coding gene_symbol:Nup155 description:nucleoporin 155 [Source:RGD Symbol;Acc:621199]	14	19	19	31	1390	155	6.18	0.943601	1.0064	0.999376	1.08583	1.01907	1.0548	0.949228	0.955165	1.00394	Quantified
ENSRNOP00000025994	glutathione S-transferase mu 4	Gstm4	pep chromosome:Rnor_6.0:2:210833884:210839295:-1 gene:ENSRNOG00000019221.6 transcript:ENSRNOT00000025994.6 gene_biotype:protein_coding transcript_biotype:protein_coding gene_symbol:Gstm4 description:glutathione S-transferase mu 4 [Source:RGD Symbol;Acc:1565825]	53	4	11	61	218	25.5	5.94	0.964536	1.00212	0.961855	0.989063	0.998721	0.979478	1.02868	1.06162	1.02881	Quantified
ENSRNOP00000062740	hypoxanthine-guanine phosphoribosyltransferase	LOC103689983	pep chromosome:Rnor_6.0:X:158197149:158228749:-1 gene:ENSRNOG00000048561.2 transcript:ENSRNOT00000065935.3 gene_biotype:protein_coding transcript_biotype:protein_coding gene_symbol:LOC103689983 description:hypoxanthine-guanine phosphoribosyltransferase [Source:RGD Symbol;Acc:9163824]	55	9	10	69	218	24.5	6.54	1.0275	1.0063	0.975783	0.982778	0.98857	1.0093	1.01763	1.00549	1.00063	Quantified
ENSRNOP00000025878	adaptor related protein complex 3 subunit delta 1	Ap3d1	pep chromosome:Rnor_6.0:7:11838639:11873984:1 gene:ENSRNOG00000018977.5 transcript:ENSRNOT00000025878.5 gene_biotype:protein_coding transcript_biotype:protein_coding gene_symbol:Ap3d1 description:adaptor related protein complex 3 subunit delta 1 [Source:RGD Symbol;Acc:1308659]	18	20	20	30	1204	135.6	7.15	1.01084	0.98513	0.998456	0.985235	1.00389	1.00446	1.02404	1.00082	1.00068	Quantified
ENSRNOP00000017407	unc-45 myosin chaperone A	Unc45a	pep chromosome:Rnor_6.0:1:142118917:142133627:-1 gene:ENSRNOG00000012357.6 transcript:ENSRNOT00000017407.6 gene_biotype:protein_coding transcript_biotype:protein_coding gene_symbol:Unc45a description:unc-45 myosin chaperone A [Source:RGD Symbol;Acc:1305357]	23	19	19	30	944	103.2	6.19	0.987527	1.02826	0.966224	0.979879	1.01452	0.977117	1.01617	1.02438	1.01978	Quantified
ENSRNOP00000070200	myosin light chain 6	Myl6	pep chromosome:Rnor_6.0:7:2906147:2909144:-1 gene:ENSRNOG00000054140.1 transcript:ENSRNOT00000082518.1 gene_biotype:protein_coding transcript_biotype:protein_coding gene_symbol:Myl6 description:myosin light chain 6 [Source:RGD Symbol;Acc:1589019]	63	9	10	79	152	17	4.65	1.01251	1.1203	0.907717	0.974845	1.0149	0.985383	1.04013	0.972189	0.985277	Quantified
ENSRNOP00000001409	translocase of inner mitochondrial membrane 44	Timm44	pep chromosome:Rnor_6.0:12:2517006:2533706:1 gene:ENSRNOG00000001058.4 transcript:ENSRNOT00000001409.4 gene_biotype:protein_coding transcript_biotype:protein_coding gene_symbol:Timm44 description:translocase of inner mitochondrial membrane 44 [Source:RGD Symbol;Acc:3864]	36	17	17	32	453	51	8.31	0.981567	0.968645	0.957554	0.959825	1.0595	0.971653	1.041	1.01637	1.05689	Quantified
ENSRNOP00000053317	poly-U binding splicing factor 60	Puf60	pep chromosome:Rnor_6.0:7:117129237:117140168:-1 gene:ENSRNOG00000009960.8 transcript:ENSRNOT00000056481.5 gene_biotype:protein_coding transcript_biotype:protein_coding gene_symbol:Puf60 description:poly-U binding splicing factor 60 [Source:RGD Symbol;Acc:621674]	30	16	16	28	563	60.1	5.29	1.02652	1.00318	1.00929	1.01058	0.998863	0.948812	1.00586	0.986372	1.02265	Quantified
ENSRNOP00000002238	translocase of outer mitochondrial membrane 70	Tomm70	pep chromosome:Rnor_6.0:11:45480250:45510961:-1 gene:ENSRNOG00000001640.6 transcript:ENSRNOT00000002238.6 gene_biotype:protein_coding transcript_biotype:protein_coding gene_symbol:Tomm70 description:translocase of outer mitochondrial membrane 70 [Source:RGD Symbol;Acc:1303049]	30	17	17	40	560	61.9	7.49	0.990594	1.00487	0.991854	0.968469	1.0028	0.986394	1.02011	1.02462	1.0241	Quantified
ENSRNOP00000072008	peripherin	Prph	pep chromosome:Rnor_6.0:7:140742418:140746197:1 gene:ENSRNOG00000052880.1 transcript:ENSRNOT00000089211.1 gene_biotype:protein_coding transcript_biotype:protein_coding gene_symbol:Prph description:peripherin [Source:RGD Symbol;Acc:3414]	28	13	17	56	473	53.9	5.4	0.889323	1.03966	0.963004	1.07	1.06831	1.05304	0.930209	1.05261	0.95249	Quantified
ENSRNOP00000070264	capping protein regulator and myosin 1 linker 1	Carmil1	pep chromosome:Rnor_6.0:17:43050789:43339402:1 gene:ENSRNOG00000016576.7 transcript:ENSRNOT00000080745.1 gene_biotype:protein_coding transcript_biotype:protein_coding gene_symbol:Carmil1 description:capping protein regulator and myosin 1 linker 1 [Source:RGD Symbol;Acc:1306623]	15	21	21	24	1421	157.4	7.99	1.02942	1.02567	0.977911	1.0157	0.991226	0.984769	0.994085	1.01361	0.981293	Quantified
ENSRNOP00000074300	H1.5 linker histone, cluster member	H1f5	pep chromosome:Rnor_6.0:17:44766313:44766981:1 gene:ENSRNOG00000060355.1 transcript:ENSRNOT00000091688.1 gene_biotype:protein_coding transcript_biotype:protein_coding gene_symbol:H1f5 description:H1.5 linker histone, cluster member [Source:RGD Symbol;Acc:1590638]	34	9	11	106	222	22.6	10.96	1.08897	1.05054	0.973912	0.960369	0.994901	0.884674	1.04384	0.959813	1.05174	Quantified
ENSRNOP00000034118	histidyl-tRNA synthetase 1	Hars1	pep chromosome:Rnor_6.0:18:29611547:29629087:-1 gene:ENSRNOG00000028105.5 transcript:ENSRNOT00000039291.5 gene_biotype:protein_coding transcript_biotype:protein_coding gene_symbol:Hars1 description:histidyl-tRNA synthetase 1 [Source:RGD Symbol;Acc:1310695]	37	19	21	34	508	57.3	6.11	0.994298	1.01046	0.98093	1.00916	1.00641	0.997216	1.01284	0.988499	1.01433	Quantified
ENSRNOP00000023554	3-hydroxy-3-methylglutaryl-CoA synthase 1	Hmgcs1	pep chromosome:Rnor_6.0:2:52431601:52445055:1 gene:ENSRNOG00000016552.6 transcript:ENSRNOT00000023554.6 gene_biotype:protein_coding transcript_biotype:protein_coding gene_symbol:Hmgcs1 description:3-hydroxy-3-methylglutaryl-CoA synthase 1 [Source:RGD Symbol;Acc:70970]	28	14	15	28	520	57.4	5.88	1.0792	0.881852	1.04676	1.06476	1.0028	0.900139	1.04667	0.953834	1.03288	Quantified
ENSRNOP00000075742	phosphofructokinase, muscle	Pfkm	pep chromosome:Rnor_6.0:7:139685573:139721950:1 gene:ENSRNOG00000057988.1 transcript:ENSRNOT00000088376.1 gene_biotype:protein_coding transcript_biotype:protein_coding gene_symbol:Pfkm description:phosphofructokinase, muscle [Source:RGD Symbol;Acc:68419]	21	13	17	41	851	93.5	7.42	1.01396	1.01479	1.04322	1.0363	0.972657	0.93424	0.986512	0.990991	1.01972	Quantified
ENSRNOP00000005280	torsin 1A interacting protein 1	Tor1aip1	pep chromosome:Rnor_6.0:13:73670141:73704678:-1 gene:ENSRNOG00000003946.8 transcript:ENSRNOT00000005280.6 gene_biotype:protein_coding transcript_biotype:protein_coding gene_symbol:Tor1aip1 description:torsin 1A interacting protein 1 [Source:RGD Symbol;Acc:628851]	28	14	15	29	583	65.6	6.42	1.01337	0.998501	0.987664	1.00048	0.985738	0.975404	1.01173	1.00033	1.04044	Quantified
ENSRNOP00000014267	carbonic anhydrase 1	Car1	pep chromosome:Rnor_6.0:2:88217188:88227479:1 gene:ENSRNOG00000010698.5 transcript:ENSRNOT00000014267.5 gene_biotype:protein_coding transcript_biotype:protein_coding gene_symbol:Car1 description:carbonic anhydrase 1 [Source:RGD Symbol;Acc:1309780]	64	12	12	31	261	28.3	7.42	0.927857	0.893061	1.01081	1.0588	1.01058	1.21645	0.909017	1.02339	0.972986	Quantified
ENSRNOP00000062597	heterogeneous nuclear ribonucleoprotein A/B	LOC103689931	pep chromosome:Rnor_6.0:10:37049677:37055282:-1 gene:ENSRNOG00000046272.2 transcript:ENSRNOT00000065584.3 gene_biotype:protein_coding transcript_biotype:protein_coding gene_symbol:LOC103689931 description:heterogeneous nuclear ribonucleoprotein A/B [Source:RGD Symbol;Acc:9343685]	48	12	13	79	285	30.8	7.91	1.02333	1.0178	0.959316	1.01017	0.986767	0.939735	0.998999	1.0055	1.07174	Quantified
ENSRNOP00000009985	cytochrome P450, family 51	Cyp51	pep chromosome:Rnor_6.0:4:27175243:27194018:1 gene:ENSRNOG00000007234.5 transcript:ENSRNOT00000009985.5 gene_biotype:protein_coding transcript_biotype:protein_coding gene_symbol:Cyp51 description:cytochrome P450, family 51 [Source:RGD Symbol;Acc:2481]	34	16	16	50	503	56.7	8.53	0.865381	0.838236	0.966872	0.863369	1.16146	0.966844	1.11571	1.09175	1.14336	Quantified
ENSRNOP00000000603	ribosomal protein L10A	Rpl10a	pep chromosome:Rnor_6.0:20:7908304:7910867:1 gene:ENSRNOG00000000505.7 transcript:ENSRNOT00000000603.7 gene_biotype:protein_coding transcript_biotype:protein_coding gene_symbol:Rpl10a description:ribosomal protein L10A [Source:RGD Symbol;Acc:620497]	44	11	11	63	217	24.8	9.94	1.06848	0.941988	0.964178	1.02242	0.966089	1.05224	0.967574	0.994577	1.03859	Quantified
ENSRNOP00000075212	EMAP like 2	Eml2	pep chromosome:Rnor_6.0:1:80092403:80119012:1 gene:ENSRNOG00000030127.5 transcript:ENSRNOT00000078336.1 gene_biotype:protein_coding transcript_biotype:protein_coding gene_symbol:Eml2 description:EMAP like 2 [Source:RGD Symbol;Acc:621066]	27	14	14	28	649	70.7	6.3	0.971597	1.02352	1.01767	1.02574	1.01267	0.946465	1.01268	0.996623	1.00574	Quantified
ENSRNOP00000020663	protein phosphatase 2 catalytic subunit beta	Ppp2cb	pep chromosome:Rnor_6.0:16:62273276:62294769:-1 gene:ENSRNOG00000015182.6 transcript:ENSRNOT00000020663.3 gene_biotype:protein_coding transcript_biotype:protein_coding gene_symbol:Ppp2cb description:protein phosphatase 2 catalytic subunit beta [Source:RGD Symbol;Acc:3381]	49	2	12	33	309	35.6	5.43	1.03372	1.0178	0.981995	0.999146	0.980305	0.954552	0.997317	1.02209	1.0262	Quantified
ENSRNOP00000067080	60S ribosomal protein L8	LOC108348142	pep chromosome:Rnor_6.0:7:117967818:117969850:1 gene:ENSRNOG00000048523.1 transcript:ENSRNOT00000073724.1 gene_biotype:protein_coding transcript_biotype:protein_coding gene_symbol:LOC108348142 description:60S ribosomal protein L8 [Source:RGD Symbol;Acc:11509187]	61	15	15	39	257	28	11.03	1.05095	0.990873	1.00781	0.970293	0.963097	1.01448	1.00441	0.979033	1.03288	Quantified
ENSRNOP00000060972	histone cluster 3, H2ba	Hist3h2ba	pep chromosome:Rnor_6.0:10:45289741:45290370:1 gene:ENSRNOG00000043419.1 transcript:ENSRNOT00000066190.1 gene_biotype:protein_coding transcript_biotype:protein_coding gene_symbol:Hist3h2ba description:histone cluster 3, H2ba [Source:RGD Symbol;Acc:1307520]	59	2	9	320	126	14	10.37	0.947319	0.875085	1.14675	0.947016	1.0623	0.912362	1.11513	0.895143	1.10674	Quantified
ENSRNOP00000013899	CTP synthase 1	Ctps1	pep chromosome:Rnor_6.0:5:139475934:139505065:-1 gene:ENSRNOG00000009963.5 transcript:ENSRNOT00000013899.5 gene_biotype:protein_coding transcript_biotype:protein_coding gene_symbol:Ctps1 description:CTP synthase 1 [Source:RGD Symbol;Acc:1311060]	25	16	16	33	591	66.6	6.58	1.10101	0.966778	0.952551	0.945783	0.973294	1.10002	0.979068	0.976627	1.02082	Quantified
ENSRNOP00000072041	capping actin protein of muscle Z-line subunit alpha 2	Capza2	pep chromosome:Rnor_6.0:4:44936290:44972267:1 gene:ENSRNOG00000056207.1 transcript:ENSRNOT00000090451.1 gene_biotype:protein_coding transcript_biotype:protein_coding gene_symbol:Capza2 description:capping actin protein of muscle Z-line subunit alpha 2 [Source:RGD Symbol;Acc:1549770]	64	9	11	38	286	32.9	5.85	1.03915	1.01375	0.951499	0.960723	0.989882	1.01356	1.00951	0.9769	1.05939	Quantified
ENSRNOP00000026552	importin 4	Ipo4	pep chromosome:Rnor_6.0:15:34304425:34314345:-1 gene:ENSRNOG00000019553.6 transcript:ENSRNOT00000026552.6 gene_biotype:protein_coding transcript_biotype:protein_coding gene_symbol:Ipo4 description:importin 4 [Source:RGD Symbol;Acc:1305206]	17	17	17	24	1081	118.9	5.02	1.05647	1.00025	1.01095	1.06475	0.958218	1.0095	0.963215	0.984673	0.966375	Quantified
ENSRNOP00000062967	eukaryotic translation initiation factor 4, gamma 2	Eif4g2	pep chromosome:Rnor_6.0:1:175883363:175895510:-1 gene:ENSRNOG00000017158.6 transcript:ENSRNOT00000064535.2 gene_biotype:protein_coding transcript_biotype:protein_coding gene_symbol:Eif4g2 description:eukaryotic translation initiation factor 4, gamma 2 [Source:RGD Symbol;Acc:1305294]	20	20	20	39	906	102.1	7.14	1.07338	1.00057	0.963816	0.994877	0.965893	1.02824	0.993799	0.990726	1.00319	Quantified
ENSRNOP00000009817	serpin family G member 1	Serping1	pep chromosome:Rnor_6.0:3:72161189:72171078:-1 gene:ENSRNOG00000007457.4 transcript:ENSRNOT00000009817.4 gene_biotype:protein_coding transcript_biotype:protein_coding gene_symbol:Serping1 description:serpin family G member 1 [Source:RGD Symbol;Acc:735225]	33	15	15	36	504	55.6	5.83	0.920396	0.995593	1.03025	1.08587	0.976064	1.00216	0.947985	1.03416	1.02493	Quantified
ENSRNOP00000009503	Serpine1 mRNA binding protein 1	Serbp1	pep chromosome:Rnor_6.0:4:98027554:98044566:1 gene:ENSRNOG00000005890.7 transcript:ENSRNOT00000009503.7 gene_biotype:protein_coding transcript_biotype:protein_coding gene_symbol:Serbp1 description:Serpine1 mRNA binding protein 1 [Source:RGD Symbol;Acc:619907]	43	18	18	45	392	43	8.44	1.03216	0.992556	1.05548	1.0397	0.965015	0.98612	0.982246	0.972723	0.987154	Quantified
ENSRNOP00000015318	protein phosphatase 2, regulatory subunit B, alpha	Ppp2r2a	pep chromosome:Rnor_6.0:15:43673960:43733182:-1 gene:ENSRNOG00000011158.6 transcript:ENSRNOT00000015318.6 gene_biotype:protein_coding transcript_biotype:protein_coding gene_symbol:Ppp2r2a description:protein phosphatase 2, regulatory subunit B, alpha [Source:RGD Symbol;Acc:620919]	38	11	15	33	447	51.6	6.2	0.982039	1.00315	1.00626	1.01495	1.00595	0.991711	1.00701	1.0082	0.994789	Quantified
ENSRNOP00000070512	aldehyde dehydrogenase 3 family, member A2	Aldh3a2	pep chromosome:Rnor_6.0:10:47526531:47546345:-1 gene:ENSRNOG00000002342.6 transcript:ENSRNOT00000077461.1 gene_biotype:protein_coding transcript_biotype:protein_coding gene_symbol:Aldh3a2 description:aldehyde dehydrogenase 3 family, member A2 [Source:RGD Symbol;Acc:61866]	25	12	13	40	584	65.3	9.1	1.01882	1.02936	0.987555	1.00349	1.01117	0.978255	1.00999	0.986936	0.987228	Quantified
ENSRNOP00000029790	eukaryotic translation initiation factor 3, subunit E-like 1	Eif3el1	pep chromosome:Rnor_6.0:13:100129761:100162461:1 gene:ENSRNOG00000027690.5 transcript:ENSRNOT00000038340.5 gene_biotype:protein_coding transcript_biotype:protein_coding gene_symbol:Eif3el1 description:eukaryotic translation initiation factor 3, subunit E-like 1 [Source:RGD Symbol;Acc:1311521]	36	16	16	43	445	52.2	6.04	1.08016	1.04095	0.87795	1.00104	0.93256	0.973584	1.0003	1.04304	1.06563	Quantified
ENSRNOP00000009923	serine/threonine kinase receptor associated protein	Strap	pep chromosome:Rnor_6.0:4:171730635:171745377:1 gene:ENSRNOG00000007134.6 transcript:ENSRNOT00000009923.6 gene_biotype:protein_coding transcript_biotype:protein_coding gene_symbol:Strap description:serine/threonine kinase receptor associated protein [Source:RGD Symbol;Acc:1311114]	38	11	11	44	350	38.4	5.12	1.08374	1.00006	0.983147	1.00384	0.951948	1.03782	0.967546	0.997436	0.989402	Quantified
ENSRNOP00000006190	protein phosphatase 1 catalytic subunit beta	Ppp1cb	pep chromosome:Rnor_6.0:6:23549317:23581052:-1 gene:ENSRNOG00000004612.4 transcript:ENSRNOT00000006190.4 gene_biotype:protein_coding transcript_biotype:protein_coding gene_symbol:Ppp1cb description:protein phosphatase 1 catalytic subunit beta [Source:RGD Symbol;Acc:3376]	44	2	12	43	327	37.2	6.19	1.04169	1.05786	1.03769	0.923562	1.06454	1.00494	0.968238	0.925706	0.987101	Quantified
ENSRNOP00000040635	inosine monophosphate dehydrogenase 2	Impdh2	pep chromosome:Rnor_6.0:8:117347029:117351610:1 gene:ENSRNOG00000031965.4 transcript:ENSRNOT00000047717.4 gene_biotype:protein_coding transcript_biotype:protein_coding gene_symbol:Impdh2 description:inosine monophosphate dehydrogenase 2 [Source:RGD Symbol;Acc:735092]	34	15	16	25	514	55.8	7.28	1.08036	1.02506	0.989786	1.04316	0.938294	1.02618	0.976973	0.949451	0.985205	Quantified
ENSRNOP00000023875	2',3'-cyclic nucleotide 3' phosphodiesterase	Cnp	pep chromosome:Rnor_6.0:10:88490798:88497356:1 gene:ENSRNOG00000017496.4 transcript:ENSRNOT00000023872.4 gene_biotype:protein_coding transcript_biotype:protein_coding gene_symbol:Cnp description:2',3'-cyclic nucleotide 3' phosphodiesterase [Source:RGD Symbol;Acc:2368]	31	16	17	35	420	47.2	8.9	1.04747	0.993114	1.02853	0.988467	0.994461	0.967685	0.997438	0.963267	1.03152	Quantified
ENSRNOP00000001669	glutathione S-transferase theta 1	Gstt1	pep chromosome:Rnor_6.0:20:13799102:13816526:1 gene:ENSRNOG00000049771.1 transcript:ENSRNOT00000001669.4 gene_biotype:protein_coding transcript_biotype:protein_coding gene_symbol:Gstt1 description:glutathione S-transferase theta 1 [Source:RGD Symbol;Acc:2765]	40	11	11	49	240	27.5	7.52	0.951857	1.05782	0.946502	0.930809	1.01276	0.994087	1.02655	1.01828	1.07647	Quantified
ENSRNOP00000001975	bromodomain adjacent to zinc finger domain, 1B	Baz1b	pep chromosome:Rnor_6.0:12:24478898:24537313:-1 gene:ENSRNOG00000001453.7 transcript:ENSRNOT00000001975.7 gene_biotype:protein_coding transcript_biotype:protein_coding gene_symbol:Baz1b description:bromodomain adjacent to zinc finger domain, 1B [Source:RGD Symbol;Acc:1597089]	14	21	21	29	1476	170.2	8.53	0.974557	0.951227	0.981195	0.9615	0.999587	1.01564	1.08026	0.94118	1.10902	Quantified
ENSRNOP00000048314	negative regulator of ubiquitin-like proteins 1	Nub1	pep chromosome:Rnor_6.0:4:6951478:6978073:-1 gene:ENSRNOG00000009282.7 transcript:ENSRNOT00000045311.4 gene_biotype:protein_coding transcript_biotype:protein_coding gene_symbol:Nub1 description:negative regulator of ubiquitin-like proteins 1 [Source:RGD Symbol;Acc:1359489]	31	18	18	21	612	70	5.52	1.03667	1.04286	1.0094	1.00283	0.98849	1.00262	0.953356	0.996177	0.98167	Quantified
ENSRNOP00000024182	nucleoporin 133	Nup133	pep chromosome:Rnor_6.0:19:56681979:56731372:-1 gene:ENSRNOG00000017919.7 transcript:ENSRNOT00000024182.7 gene_biotype:protein_coding transcript_biotype:protein_coding gene_symbol:Nup133 description:nucleoporin 133 [Source:RGD Symbol;Acc:1307827]	20	20	20	23	1154	128.3	5.14	0.979559	0.98461	0.993589	0.97901	1.004	1.00531	1.02307	1.02302	1.02235	Quantified
ENSRNOP00000021671	parvin, alpha	Parva	pep chromosome:Rnor_6.0:1:177249226:177408205:1 gene:ENSRNOG00000015713.5 transcript:ENSRNOT00000021671.5 gene_biotype:protein_coding transcript_biotype:protein_coding gene_symbol:Parva description:parvin, alpha [Source:RGD Symbol;Acc:71021]	33	11	13	44	372	42.3	5.95	0.989746	1.03102	0.977798	1.01146	1.03424	0.965272	1.03377	0.991479	0.977644	Quantified
ENSRNOP00000071954	ATPase H+ transporting V0 subunit a1	Atp6v0a1	pep chromosome:Rnor_6.0:10:88914276:88967732:1 gene:ENSRNOG00000036814.4 transcript:ENSRNOT00000087076.1 gene_biotype:protein_coding transcript_biotype:protein_coding gene_symbol:Atp6v0a1 description:ATPase H+ transporting V0 subunit a1 [Source:RGD Symbol;Acc:68405]	21	13	15	24	838	96.2	6.54	1.00481	1.00417	0.946192	0.998041	1.00102	1.00094	1.01167	1.01386	1.03417	Quantified
ENSRNOP00000071611	proteasome 20S subunit alpha 7	Psma7	pep chromosome:Rnor_6.0:3:175420039:175426395:-1 gene:ENSRNOG00000056853.1 transcript:ENSRNOT00000082686.1 gene_biotype:protein_coding transcript_biotype:protein_coding gene_symbol:Psma7 description:proteasome 20S subunit alpha 7 [Source:RGD Symbol;Acc:61851]	62	13	13	42	248	27.8	8.46	1.0173	1.00668	0.997323	0.997853	0.998335	0.991242	0.994474	1.03513	0.975415	Quantified
ENSRNOP00000018009	protein kinase C substrate 80K-H	Prkcsh	pep chromosome:Rnor_6.0:8:23014956:23026503:1 gene:ENSRNOG00000013360.6 transcript:ENSRNOT00000018009.6 gene_biotype:protein_coding transcript_biotype:protein_coding gene_symbol:Prkcsh description:protein kinase C substrate 80K-H [Source:RGD Symbol;Acc:1309628]	27	15	15	34	525	59.2	4.48	1.00355	0.970216	0.99212	1.01091	1.01886	0.968484	1.02292	1.01025	1.01561	Quantified
ENSRNOP00000046842	ATPase family, AAA domain containing 3A	Atad3a	pep chromosome:Rnor_6.0:5:173189592:173209768:-1 gene:ENSRNOG00000018118.6 transcript:ENSRNOT00000045053.3 gene_biotype:protein_coding transcript_biotype:protein_coding gene_symbol:Atad3a description:ATPase family, AAA domain containing 3A [Source:RGD Symbol;Acc:1305964]	31	19	19	39	591	66.7	9.29	0.988247	0.971922	0.95897	0.97387	1.00959	0.993582	1.0074	1.07214	1.03939	Quantified
ENSRNOP00000009198	arginyl aminopeptidase	Rnpep	pep chromosome:Rnor_6.0:13:52092859:52111363:-1 gene:ENSRNOG00000006720.7 transcript:ENSRNOT00000009198.5 gene_biotype:protein_coding transcript_biotype:protein_coding gene_symbol:Rnpep description:arginyl aminopeptidase [Source:RGD Symbol;Acc:621137]	27	14	14	20	650	72.6	5.59	1.00308	1.03521	1.04596	1.00303	1.02227	0.958164	1.00596	0.9806	0.957139	Quantified
ENSRNOP00000001118	dimethylarginine dimethylaminohydrolase 2	Ddah2	pep chromosome:Rnor_6.0:20:5049505:5052572:1 gene:ENSRNOG00000000842.5 transcript:ENSRNOT00000001118.5 gene_biotype:protein_coding transcript_biotype:protein_coding gene_symbol:Ddah2 description:dimethylarginine dimethylaminohydrolase 2 [Source:RGD Symbol;Acc:1302955]	56	13	14	24	285	29.7	6.01	0.954656	1.05862	1.0079	1.08404	0.995179	0.988872	0.960567	1.04203	0.923621	Quantified
ENSRNOP00000003542	phosphomannomutase 2	Pmm2	pep chromosome:Rnor_6.0:10:7056266:7077443:-1 gene:ENSRNOG00000002615.5 transcript:ENSRNOT00000003542.5 gene_biotype:protein_coding transcript_biotype:protein_coding gene_symbol:Pmm2 description:phosphomannomutase 2 [Source:RGD Symbol;Acc:1309366]	50	13	14	46	242	27.7	7.3	0.960664	0.962459	0.966264	0.95638	0.987659	1.12318	0.988609	1.06949	1.00464	Quantified
ENSRNOP00000015474	heat shock protein family A (Hsp70) member 4 like	Hspa4l	pep chromosome:Rnor_6.0:2:127625683:127677503:1 gene:ENSRNOG00000010819.6 transcript:ENSRNOT00000015474.6 gene_biotype:protein_coding transcript_biotype:protein_coding gene_symbol:Hspa4l description:heat shock protein family A (Hsp70) member 4 like [Source:RGD Symbol;Acc:1306528]	11	8	10	23	1017	114.2	5.83	0.832081	0.976752	1.17829	0.9841	0.992154	0.980194	0.959073	1.06699	1.04629	Quantified
ENSRNOP00000026398	eukaryotic translation termination factor 1	Etf1	pep chromosome:Rnor_6.0:18:27698695:27725694:-1 gene:ENSRNOG00000019450.5 transcript:ENSRNOT00000026398.5 gene_biotype:protein_coding transcript_biotype:protein_coding gene_symbol:Etf1 description:eukaryotic translation termination factor 1 [Source:RGD Symbol;Acc:1305712]	31	13	13	28	437	49	5.71	1.05204	1.00673	0.997447	1.01432	0.954091	1.02177	0.999072	0.974905	0.993932	Quantified
ENSRNOP00000027704	WD repeat domain 11	Wdr11	pep chromosome:Rnor_6.0:1:202770775:202816334:1 gene:ENSRNOG00000020430.6 transcript:ENSRNOT00000027704.6 gene_biotype:protein_coding transcript_biotype:protein_coding gene_symbol:Wdr11 description:WD repeat domain 11 [Source:RGD Symbol;Acc:1587347]	16	17	17	25	1224	135.7	7.12	1.05119	1.0056	0.972715	0.987719	0.972582	1.05407	1.01785	0.969327	0.983642	Quantified
ENSRNOP00000002111	alkylglycerone phosphate synthase	Agps	pep chromosome:Rnor_6.0:3:62648447:62749153:1 gene:ENSRNOG00000001547.5 transcript:ENSRNOT00000002111.5 gene_biotype:protein_coding transcript_biotype:protein_coding gene_symbol:Agps description:alkylglycerone phosphate synthase [Source:RGD Symbol;Acc:620364]	32	17	17	33	644	71.5	7.65	0.958149	1.02488	0.948127	1.02623	1.01436	1.02867	0.993433	1.01786	1.00485	Quantified
ENSRNOP00000017017	peptidase, mitochondrial processing beta subunit	Pmpcb	pep chromosome:Rnor_6.0:4:9908831:9921610:-1 gene:ENSRNOG00000012693.5 transcript:ENSRNOT00000017018.5 gene_biotype:protein_coding transcript_biotype:protein_coding gene_symbol:Pmpcb description:peptidase, mitochondrial processing beta subunit [Source:RGD Symbol;Acc:621297]	31	12	13	23	489	54.2	6.7	1.00214	1.00445	0.917883	0.971722	1.02238	0.993271	1.03074	1.01449	1.05741	Quantified
ENSRNOP00000024601	glutathione S-transferase pi 1	Gstp1	pep chromosome:Rnor_6.0:1:219291679:219294147:-1 gene:ENSRNOG00000018237.4 transcript:ENSRNOT00000024601.4 gene_biotype:protein_coding transcript_biotype:protein_coding gene_symbol:Gstp1 description:glutathione S-transferase pi 1 [Source:RGD Symbol;Acc:2758]	44	8	8	58	210	23.4	7.36	1.03003	1.12872	0.943782	0.984719	0.953499	0.902117	1.01309	1.02394	1.03238	Quantified
ENSRNOP00000072693	PTPRF interacting protein alpha 1	Ppfia1	pep chromosome:Rnor_6.0:1:217644224:217720414:-1 gene:ENSRNOG00000020857.8 transcript:ENSRNOT00000078810.1 gene_biotype:protein_coding transcript_biotype:protein_coding gene_symbol:Ppfia1 description:PTPRF interacting protein alpha 1 [Source:RGD Symbol;Acc:1309009]	18	23	23	25	1226	137.9	6.37	0.985459	0.981645	0.992718	1.00099	1.01626	1.02807	1.01464	1.01615	0.978834	Quantified
ENSRNOP00000073213	calumenin	Calu	pep chromosome:Rnor_6.0:4:56625606:56653111:1 gene:ENSRNOG00000006197.7 transcript:ENSRNOT00000090808.1 gene_biotype:protein_coding transcript_biotype:protein_coding gene_symbol:Calu description:calumenin [Source:RGD Symbol;Acc:620383]	49	1	12	37	315	37.1	4.6	1.11611	1.05148	1.06387	1.09068	0.959581	0.90597	1.00344	0.901544	0.915555	Quantified
ENSRNOP00000071846	G1 to S phase transition 1	Gspt1	pep chromosome:Rnor_6.0:10:4312863:4446200:1 gene:ENSRNOG00000046271.2 transcript:ENSRNOT00000091610.1 gene_biotype:protein_coding transcript_biotype:protein_coding gene_symbol:Gspt1 description:G1 to S phase transition 1 [Source:RGD Symbol;Acc:2751]	23	5	16	29	636	68.7	5.21	1.0116	1.00002	1.01804	0.995518	0.995719	0.975812	1.00115	0.986641	1.0286	Quantified
ENSRNOP00000016423	collagen, type I, alpha 2	NEWGENE_621351	pep chromosome:Rnor_6.0:4:31534225:31569151:1 gene:ENSRNOG00000011292.6 transcript:ENSRNOT00000016423.6 gene_biotype:protein_coding transcript_biotype:protein_coding gene_symbol:NEWGENE_621351 description:collagen, type I, alpha 2 [Source:RGD Symbol;Acc:9452897]	11	14	14	69	1372	129.6	9.29	0.90401	1.1236	1.05289	1.08553	1.07398	1.10067	0.988204	1.0836	0.60285	Quantified
ENSRNOP00000001822	endoplasmic reticulum protein 29	Erp29	pep chromosome:Rnor_6.0:12:40619377:40625883:1 gene:ENSRNOG00000001348.5 transcript:ENSRNOT00000001822.5 gene_biotype:protein_coding transcript_biotype:protein_coding gene_symbol:Erp29 description:endoplasmic reticulum protein 29 [Source:RGD Symbol;Acc:619781]	46	10	10	37	260	28.6	6.62	1.12928	1.03467	0.946129	1.02577	0.902402	0.984913	0.978796	0.991439	1.02054	Quantified
ENSRNOP00000000134	adenylate kinase 2	Ak2	pep chromosome:Rnor_6.0:5:147185474:147204050:1 gene:ENSRNOG00000000122.4 transcript:ENSRNOT00000000134.4 gene_biotype:protein_coding transcript_biotype:protein_coding gene_symbol:Ak2 description:adenylate kinase 2 [Source:RGD Symbol;Acc:2077]	63	14	14	40	232	25.5	7.46	0.966598	0.988211	1.00886	0.983907	1.03679	1.02737	1.00339	1.00239	0.997166	Quantified
ENSRNOP00000026021	fibrillarin	Fbl	pep chromosome:Rnor_6.0:1:85103519:85112619:1 gene:ENSRNOG00000019229.4 transcript:ENSRNOT00000026021.4 gene_biotype:protein_coding transcript_biotype:protein_coding gene_symbol:Fbl description:fibrillarin [Source:RGD Symbol;Acc:1305542]	46	14	14	50	327	34.2	10.24	1.00392	0.997327	1.0091	1.00072	0.996975	0.954821	1.02	0.983716	1.04604	Quantified
ENSRNOP00000000891	spliceosome associated factor 3, U4/U6 recycling protein	Sart3	pep chromosome:Rnor_6.0:12:48628278:48656096:1 gene:ENSRNOG00000000702.5 transcript:ENSRNOT00000000891.5 gene_biotype:protein_coding transcript_biotype:protein_coding gene_symbol:Sart3 description:spliceosome associated factor 3, U4/U6 recycling protein [Source:RGD Symbol;Acc:1311646]	19	19	19	26	960	109.4	5.43	1.00115	1.03216	0.981914	0.999781	0.991948	0.95428	1.0086	1.04055	1.00298	Quantified
ENSRNOP00000028373	pre-mRNA processing factor 19	Prpf19	pep chromosome:Rnor_6.0:1:226947105:226958144:1 gene:ENSRNOG00000020897.6 transcript:ENSRNOT00000028373.6 gene_biotype:protein_coding transcript_biotype:protein_coding gene_symbol:Prpf19 description:pre-mRNA processing factor 19 [Source:RGD Symbol;Acc:708496]	29	11	11	28	504	55.2	6.61	1.0682	1.00466	1.00564	0.998527	0.9844	0.945047	1.01596	0.993026	0.99568	Quantified
ENSRNOP00000008355	splicing factor 3a, subunit 1	Sf3a1	pep chromosome:Rnor_6.0:14:84393182:84413931:1 gene:ENSRNOG00000005218.5 transcript:ENSRNOT00000008355.5 gene_biotype:protein_coding transcript_biotype:protein_coding gene_symbol:Sf3a1 description:splicing factor 3a, subunit 1 [Source:RGD Symbol;Acc:1311477]	24	17	17	41	791	88.5	5.22	1.01621	1.02104	0.97813	1.01022	1.00862	0.966087	0.998178	0.997884	1.01684	Quantified
ENSRNOP00000013515	acyl-CoA thioesterase 2	Acot2	pep chromosome:Rnor_6.0:6:107460668:107467487:1 gene:ENSRNOG00000010134.5 transcript:ENSRNOT00000013515.5 gene_biotype:protein_coding transcript_biotype:protein_coding gene_symbol:Acot2 description:acyl-CoA thioesterase 2 [Source:RGD Symbol;Acc:621055]	33	8	13	59	453	49.6	8.07	0.95063	1.02864	0.957699	1.00966	1.01667	1.02627	0.991483	0.982966	1.05246	Quantified
ENSRNOP00000005961	adenylosuccinate synthase	Adss	pep chromosome:Rnor_6.0:13:95913426:95943761:-1 gene:ENSRNOG00000004481.5 transcript:ENSRNOT00000005961.5 gene_biotype:protein_coding transcript_biotype:protein_coding gene_symbol:Adss description:adenylosuccinate synthase [Source:RGD Symbol;Acc:1310508]	34	10	12	25	456	50.1	6.38	0.996921	1.01856	1.07062	0.99353	0.996814	1.02701	0.977416	0.959736	0.973232	Quantified
ENSRNOP00000075462	ribosomal protein S9	Rps9	pep chromosome:Rnor_6.0:1:64018398:64021321:-1 gene:ENSRNOG00000058909.1 transcript:ENSRNOT00000090819.1 gene_biotype:protein_coding transcript_biotype:protein_coding gene_symbol:Rps9 description:ribosomal protein S9 [Source:RGD Symbol;Acc:619889]	56	16	16	113	194	22.6	10.65	1.07263	0.963602	0.983166	0.997196	0.956049	1.02079	1.00546	0.985276	1.03004	Quantified
ENSRNOP00000027512	programmed cell death 11	Pdcd11	pep chromosome:Rnor_6.0:1:266866931:266908042:1 gene:ENSRNOG00000020304.5 transcript:ENSRNOT00000027512.3 gene_biotype:protein_coding transcript_biotype:protein_coding gene_symbol:Pdcd11 description:programmed cell death 11 [Source:RGD Symbol;Acc:1304933]	10	20	20	24	1876	209.3	8.9	1.01965	0.996669	0.9956	1.03449	0.984285	1.01131	0.981407	0.991638	0.999724	Quantified
ENSRNOP00000054947	ATPase Na+/K+ transporting subunit alpha 2	Atp1a2	pep chromosome:Rnor_6.0:13:90651686:90676629:-1 gene:ENSRNOG00000007290.6 transcript:ENSRNOT00000058143.2 gene_biotype:protein_coding transcript_biotype:protein_coding gene_symbol:Atp1a2 description:ATPase Na+/K+ transporting subunit alpha 2 [Source:RGD Symbol;Acc:2168]	18	4	17	32	1020	112.1	5.55	0.898139	1.03669	1.02556	1.00462	0.980631	0.987877	1.03174	1.03874	1.01154	Quantified
ENSRNOP00000069913	methyl CpG binding protein 2	Mecp2	pep chromosome:Rnor_6.0:X:156655960:156705233:1 gene:ENSRNOG00000056659.1 transcript:ENSRNOT00000085723.1 gene_biotype:protein_coding transcript_biotype:protein_coding gene_symbol:Mecp2 description:methyl CpG binding protein 2 [Source:RGD Symbol;Acc:3075]	36	17	17	32	492	53	9.96	0.99294	1.00895	1.02751	0.995466	1.04044	0.957395	1.0364	0.959574	0.992486	Quantified
ENSRNOP00000051248	cell division cycle 37	Cdc37	pep chromosome:Rnor_6.0:8:22160922:22173797:-1 gene:ENSRNOG00000033426.4 transcript:ENSRNOT00000042314.3 gene_biotype:protein_coding transcript_biotype:protein_coding gene_symbol:Cdc37 description:cell division cycle 37 [Source:RGD Symbol;Acc:71006]	35	12	12	29	378	44.2	5.57	1.00077	0.970086	1.05495	1.0127	1.02192	1.067	1.00638	0.940974	0.93926	Quantified
ENSRNOP00000055935	asparaginyl-tRNA synthetase 1	Nars1	pep chromosome:Rnor_6.0:18:59986360:60002569:-1 gene:ENSRNOG00000017852.8 transcript:ENSRNOT00000059162.4 gene_biotype:protein_coding transcript_biotype:protein_coding gene_symbol:Nars1 description:asparaginyl-tRNA synthetase 1 [Source:RGD Symbol;Acc:1307238]	26	1	11	25	507	58.3	6.16	0.932632	0.733303	1.2167	0.953352	1.16	0.979829	1.07517	0.877978	1.07912	Quantified
ENSRNOP00000010373	splicing factor 3a, subunit 3	Sf3a3	pep chromosome:Rnor_6.0:5:142702721:142722341:1 gene:ENSRNOG00000007629.7 transcript:ENSRNOT00000010373.5 gene_biotype:protein_coding transcript_biotype:protein_coding gene_symbol:Sf3a3 description:splicing factor 3a, subunit 3 [Source:RGD Symbol;Acc:1308726]	26	14	14	43	501	58.8	5.34	1.00644	0.981892	0.998216	0.993279	1.00991	0.961824	1.01906	1.0176	1.02458	Quantified
ENSRNOP00000058397	annexin A7	Anxa7	pep chromosome:Rnor_6.0:15:4254499:4281287:1 gene:ENSRNOG00000007136.6 transcript:ENSRNOT00000061686.3 gene_biotype:protein_coding transcript_biotype:protein_coding gene_symbol:Anxa7 description:annexin A7 [Source:RGD Symbol;Acc:621173]	35	15	15	29	463	50	6.18	0.982023	1.06212	0.962113	1.00014	1.01704	0.972206	1.0146	1.03213	0.971311	Quantified
ENSRNOP00000027561	syntrophin, beta 2	Sntb2	pep chromosome:Rnor_6.0:19:39126589:39209152:1 gene:ENSRNOG00000020344.6 transcript:ENSRNOT00000027561.6 gene_biotype:protein_coding transcript_biotype:protein_coding gene_symbol:Sntb2 description:syntrophin, beta 2 [Source:RGD Symbol;Acc:1592340]	33	14	16	36	522	56.5	8.69	0.96775	0.989306	0.99013	0.971359	1.00233	1.04961	1.04016	1.01484	0.989949	Quantified
ENSRNOP00000069264	cold shock domain containing E1	Csde1	pep chromosome:Rnor_6.0:2:205525204:205552991:1 gene:ENSRNOG00000061058.1 transcript:ENSRNOT00000091210.1 gene_biotype:protein_coding transcript_biotype:protein_coding gene_symbol:Csde1 description:cold shock domain containing E1 [Source:RGD Symbol;Acc:619726]	24	21	21	37	798	88.8	6.37	1.01664	0.985044	0.951837	0.970483	0.972394	1.07975	0.99684	1.03716	1.00708	Quantified
ENSRNOP00000026662	signal transducer and activator of transcription 5A	Stat5a	pep chromosome:Rnor_6.0:10:88764732:88789057:1 gene:ENSRNOG00000019496.4 transcript:ENSRNOT00000026662.3 gene_biotype:protein_coding transcript_biotype:protein_coding gene_symbol:Stat5a description:signal transducer and activator of transcription 5A [Source:RGD Symbol;Acc:3773]	23	2	18	26	793	90.7	6.33	0.97269	0.995962	1.06391	0.980288	1.00927	0.986041	0.996539	1.02154	0.987048	Quantified
ENSRNOP00000025260	phosphoenolpyruvate carboxykinase 2 (mitochondrial)	Pck2	pep chromosome:Rnor_6.0:15:34216833:34224193:1 gene:ENSRNOG00000018536.7 transcript:ENSRNOT00000025260.7 gene_biotype:protein_coding transcript_biotype:protein_coding gene_symbol:Pck2 description:phosphoenolpyruvate carboxykinase 2 (mitochondrial) [Source:RGD Symbol;Acc:1311112]	24	13	13	25	641	71.2	8.34	0.980272	0.995746	0.994221	1.00908	1.02001	0.960974	1.01051	1.01383	1.02875	Quantified
ENSRNOP00000058448	quiescin sulfhydryl oxidase 2	Qsox2	pep chromosome:Rnor_6.0:3:3662324:3691972:-1 gene:ENSRNOG00000018574.6 transcript:ENSRNOT00000061735.2 gene_biotype:protein_coding transcript_biotype:protein_coding gene_symbol:Qsox2 description:quiescin sulfhydryl oxidase 2 [Source:RGD Symbol;Acc:1584720]	23	15	15	26	708	79.1	8.27	0.998073	0.994344	0.972472	1.08589	1.00407	0.876605	1.01856	1.00604	1.05568	Quantified
ENSRNOP00000013046	DEAD-box helicase 42	Ddx42	pep chromosome:Rnor_6.0:10:94407559:94439052:1 gene:ENSRNOG00000009474.5 transcript:ENSRNOT00000013046.5 gene_biotype:protein_coding transcript_biotype:protein_coding gene_symbol:Ddx42 description:DEAD-box helicase 42 [Source:RGD Symbol;Acc:1304909]	17	14	14	23	929	102	7.03	1.01999	0.983704	1.02292	1.01441	1.01468	1.02352	1.01333	0.981199	0.939445	Quantified
ENSRNOP00000025904	stomatin	Stom	pep chromosome:Rnor_6.0:3:14514868:14538241:-1 gene:ENSRNOG00000019147.7 transcript:ENSRNOT00000025904.6 gene_biotype:protein_coding transcript_biotype:protein_coding gene_symbol:Stom description:stomatin [Source:RGD Symbol;Acc:1305109]	43	10	10	34	284	31.4	7.03	0.979925	0.897138	0.939274	0.938714	1.06719	1.07692	1.00463	1.05659	1.05646	Quantified
[truncated: 6,441 more rows]
